# Supplementary material for: New prenylated coumarins from the stems of Toddalia asiatica
Source: Royal Society of Chemistry journal article supplement (doi:10.1039/c7ra04794k), 2017-01-01

# Electronic Supplementary Information

## **New prenylated coumarins from the stems of *Toddalia asiatica***

Wei Li<sup>a</sup>, Jun-Sheng Zhang<sup>a</sup>, Jia-Luo Huang<sup>a</sup>, Min-Hong Jiang<sup>a</sup>, You-Kai Xu<sup>b</sup>, Abrar Ahmed<sup>a</sup>, Sheng Yin<sup>a</sup>  
and Gui-Hua Tang<sup>\*a</sup>

<sup>a</sup> School of Pharmaceutical Sciences, Sun Yat-sen University, Guangzhou, Guangdong 510006, China

<sup>b</sup> Key Laboratory of Tropical Plant Resource and Sustainable Use, Xishuangbanna Tropical Botanical Garden, Chinese Academy of Sciences, Menglun, Yunnan 666303, China

\*Corresponding author.

*E-mail addresses:* tanggh5@mail.sysu.edu.cn

## Contents:

|             |      |
|-------------|------|
| S1. Figures | p6–7 |
|-------------|------|

**Fig. S1.1.** Known compounds (**8–40**) from the stem of *Toddalia asiatica*

**Fig. S1.2.** Key NOE correlations of compound **2**

|            |       |
|------------|-------|
| S2. Tables | p8–16 |
|------------|-------|

**Table S2.1.**  $^1\text{H}$  NMR spectroscopic data of **8, 9, 11–16, and 18–23** in  $\text{CDCl}_3$  (400 MHz,  $J$  in Hz,  $\delta$  in ppm)

**Table S2.2.**  $^{13}\text{C}$  NMR spectroscopic data of **8, 9, 11–16, and 18–23** in  $\text{CDCl}_3$  (100 MHz,  $\delta$  in ppm)

**Table S2.3.**  $^1\text{H}$  NMR (400 MHz) and  $^{13}\text{C}$  NMR (100 MHz) spectroscopic data of **10, 17, and 21** ( $J$  in Hz,  $\delta$  in ppm)

**Table S2.4.**  $^1\text{H}$  NMR (400 MHz) and  $^{13}\text{C}$  NMR (100 MHz) spectroscopic data of **24** ( $J$  in Hz,  $\delta$  in ppm)

**Table S2.5.**  $^1\text{H}$  NMR (400 MHz) and  $^{13}\text{C}$  NMR (100 MHz) spectroscopic data of **25 and 26** in  $\text{CDCl}_3$  ( $J$  in Hz,  $\delta$  in ppm)

**Table S2.6.**  $^1\text{H}$  NMR (400 MHz) and  $^{13}\text{C}$  NMR (100 MHz) spectroscopic data of **27** in  $\text{CDCl}_3$  ( $J$  in Hz,  $\delta$  in ppm)

**Table S2.7.**  $^1\text{H}$  NMR (400 MHz) and  $^{13}\text{C}$  NMR (100 MHz) spectroscopic data of **28–30** ( $J$  in Hz,  $\delta$  in ppm)

**Table S2.8.**  $^1\text{H}$  NMR (400 MHz) and  $^{13}\text{C}$  NMR (100 MHz) spectroscopic data of **31–33** ( $J$  in Hz,  $\delta$  in ppm)

**Table S2.9.**  $^1\text{H}$  NMR (400 MHz) and  $^{13}\text{C}$  NMR (100 MHz) spectroscopic data of **34–36** ( $J$  in Hz,  $\delta$  in ppm)

**Table S2.10.**  $^1\text{H}$  NMR (400 MHz) and  $^{13}\text{C}$  NMR (100 MHz) spectroscopic data of **37–40** in  $\text{CDCl}_3$  ( $J$  in Hz,  $\delta$  in ppm)

|                                            |        |
|--------------------------------------------|--------|
| S3. Experimental and computational section | p17–26 |
|--------------------------------------------|--------|

**S3.1.** Experimental section      Extraction and isolation

**Scheme S3.1.** Flow chart for the isolation of chemical constituents from *Toddalia asiatica*

**S3.2.** Experimental section      PDE4D inhibitory screening assays

|                                                                                                                                                                  |                                                |
|------------------------------------------------------------------------------------------------------------------------------------------------------------------|------------------------------------------------|
| <b>S3.2.1.</b> Expression and purification of PDE4D2 protein                                                                                                     |                                                |
| <b>S3.2.2.</b> Enzymatic assay                                                                                                                                   |                                                |
| <b>S3.3.</b> Computational section                                                                                                                               | ECD and specific optical rotation calculations |
| <b>S3.3.1.</b> ECD calculations of compounds <b>1a/1b</b> and <b>2a/2b</b>                                                                                       |                                                |
| <b>S3.3.2</b> Specific optical rotation calculation of (1' <i>S</i> ,2' <i>S</i> ,3' <i>R</i> )- <b>1</b> and (1' <i>S</i> ,2' <i>S</i> ,3' <i>R</i> )- <b>2</b> |                                                |

**S4.** 1D and 2D NMR spectra of new compounds **1–7** .....p27–61

|                                                                |                                                                                 |
|----------------------------------------------------------------|---------------------------------------------------------------------------------|
| in CDCl <sub>3</sub>                                           |                                                                                 |
| <b>S4.1.</b> <sup>1</sup> H NMR spectrum of compound <b>1</b>  | <b>S4.2.</b> <sup>13</sup> C NMR and DEPT spectra of compound <b>1</b>          |
| <b>S4.3.</b> HSQC spectrum of compound <b>1</b>                | <b>S4.4.</b> <sup>1</sup> H– <sup>1</sup> H COSY spectrum of compound <b>1</b>  |
| <b>S4.5.</b> HMBC spectrum of compound <b>1</b>                | <b>S4.6.</b> NOESY spectrum of compound <b>1</b>                                |
| in CD <sub>3</sub> OD                                          |                                                                                 |
| <b>S4.7.</b> <sup>1</sup> H NMR spectrum of compound <b>2</b>  | <b>S4.8.</b> <sup>13</sup> C NMR and DEPT spectra of compound <b>2</b>          |
| <b>S4.9.</b> HSQC spectrum of compound <b>2</b>                | <b>S4.10.</b> <sup>1</sup> H– <sup>1</sup> H COSY spectrum of compound <b>2</b> |
| <b>S4.11.</b> HMBC spectrum of compound <b>2</b>               | <b>S4.12.</b> NOESY spectrum of compound <b>2</b>                               |
| in CDCl <sub>3</sub>                                           |                                                                                 |
| <b>S4.13.</b> <sup>1</sup> H NMR spectrum of compound <b>3</b> | <b>S4.14.</b> <sup>13</sup> C NMR and DEPT spectra of compound <b>3</b>         |
| <b>S4.15.</b> HSQC spectrum of compound <b>3</b>               | <b>S4.16.</b> <sup>1</sup> H– <sup>1</sup> H COSY spectrum of compound <b>3</b> |
| <b>S4.17.</b> HMBC spectrum of compound <b>3</b>               | <b>S4.18.</b> NOESY spectrum of compound <b>3</b>                               |
| in CDCl <sub>3</sub>                                           |                                                                                 |
| <b>S4.19.</b> <sup>1</sup> H NMR spectrum of compound <b>4</b> | <b>S4.20.</b> <sup>13</sup> C NMR and DEPT spectra of compound <b>4</b>         |
| <b>S4.21.</b> HSQC spectrum of compound <b>4</b>               | <b>S4.22.</b> HMBC spectrum of compound <b>4</b>                                |
| in CDCl <sub>3</sub>                                           |                                                                                 |
| <b>S4.23.</b> <sup>1</sup> H NMR spectrum of compound <b>5</b> | <b>S3.24.</b> <sup>13</sup> C NMR and DEPT spectra of compound <b>5</b>         |
| <b>S4.25.</b> HSQC spectrum of compound <b>5</b>               | <b>S4.26.</b> HMBC spectrum of compound <b>5</b>                                |
| in CDCl <sub>3</sub>                                           |                                                                                 |
| <b>S4.27.</b> <sup>1</sup> H NMR spectrum of compound <b>6</b> | <b>S4.28.</b> <sup>13</sup> C NMR and DEPT spectra of compound <b>6</b>         |
| <b>S4.29.</b> HSQC spectrum of compound <b>6</b>               | <b>S4.30.</b> HMBC spectrum of compound <b>6</b>                                |
| in CD <sub>3</sub> OD                                          |                                                                                 |
| <b>S4.31.</b> <sup>1</sup> H NMR spectrum of compound <b>7</b> | <b>S4.32.</b> <sup>13</sup> C NMR and DEPT spectra of compound <b>7</b>         |
| <b>S4.33.</b> HSQC spectrum of compound <b>7</b>               | <b>S4.34.</b> HMBC spectrum of compound <b>7</b>                                |
| <b>S4.35.</b> NOESY spectrum of compound <b>7</b>              |                                                                                 |

**S5. MS, HRMS, and IR spectra of new compounds 1–7** .....p62–75

|                                                    |                                                    |
|----------------------------------------------------|----------------------------------------------------|
| <b>S5.1.</b> ESIMS data of compound 1              | <b>S5.2.</b> HRESIMS data of compound 1            |
| <b>S5.3.</b> ESIMS data of compound 2              | <b>S5.4.</b> HRESIMS data of compound 2            |
| <b>S5.5.</b> ESIMS data of compound 3              | <b>S5.6.</b> HRESIMS data of compound 3            |
| <b>S5.7.</b> ESIMS data of compound 4              | <b>S5.8.</b> HRESIMS data of compound 4            |
| <b>S5.9.</b> ESIMS data of compound 5              | <b>S5.10.</b> HRESIMS data of compound 5           |
| <b>S5.11.</b> ESIMS data of compound 6             | <b>S5.12.</b> HRESIMS data of compound 6           |
| <b>S5.13.</b> ESIMS data of compound 7             | <b>S5.14.</b> HRESIMS data of compound 7           |
|                                                    |                                                    |
| <b>S5.15.</b> IR (KBr disc) spectrum of compound 1 | <b>S5.16.</b> IR (KBr disc) spectrum of compound 2 |
| <b>S5.17.</b> IR (KBr disc) spectrum of compound 3 | <b>S5.18.</b> IR (KBr disc) spectrum of compound 4 |
| <b>S5.19.</b> IR (KBr disc) spectrum of compound 5 | <b>S5.20.</b> IR (KBr disc) spectrum of compound 6 |
| <b>S5.21.</b> IR (KBr disc) spectrum of compound 7 |                                                    |

**S6. 1D NMR spectra of known compounds 8–40** .....p76–145

|                                                          |                                                                           |
|----------------------------------------------------------|---------------------------------------------------------------------------|
| in CDCl <sub>3</sub>                                     |                                                                           |
| <b>S6.1.</b> <sup>1</sup> H NMR spectrum of compound 8   | <b>S6.2.</b> <sup>13</sup> C NMR and DEPT spectra of compound 8           |
| <b>S6.3.</b> <sup>1</sup> H NMR spectrum of compound 9   | <b>S6.4.</b> <sup>13</sup> C NMR spectrum of compound 9                   |
| <b>S6.5.</b> <sup>1</sup> H NMR spectrum of compound 10  | <b>S6.6.</b> <sup>13</sup> C NMR and DEPT spectra of compound 10          |
| <b>S6.7.</b> <sup>1</sup> H NMR spectrum of compound 11  | <b>S6.8.</b> <sup>13</sup> C NMR spectrum of compound 11                  |
| <b>S6.9.</b> <sup>1</sup> H NMR spectrum of compound 12  | <b>S6.10.</b> <sup>13</sup> C NMR and DEPT spectra of compound 12         |
| <b>S6.11.</b> <sup>1</sup> H NMR spectrum of compound 13 | <b>S6.12.</b> <sup>13</sup> C NMR spectrum of compound 13                 |
| <b>S6.13.</b> <sup>1</sup> H NMR spectrum of compound 14 | <b>S6.14.</b> <sup>13</sup> C NMR and DEPT spectra of compound 14         |
| <b>S6.15.</b> <sup>1</sup> H NMR spectrum of compound 15 | <b>S6.16.</b> <sup>13</sup> C NMR and DEPT spectra of compound 15         |
| <b>S6.17.</b> <sup>1</sup> H NMR spectrum of compound 16 | <b>S6.18.</b> <sup>13</sup> C NMR and DEPT spectra of compound 16         |
| in CD <sub>3</sub> OD                                    |                                                                           |
| <b>S6.19.</b> <sup>1</sup> H NMR spectrum of compound 17 | <b>S6.20.</b> <sup>13</sup> C NMR and DEPT spectra of compound 17         |
| in CDCl <sub>3</sub>                                     |                                                                           |
| <b>S6.21.</b> <sup>1</sup> H NMR spectrum of compound 18 | <b>S6.22.</b> <sup>13</sup> C NMR and DEPT spectra of compound 18         |
| <b>S6.23.</b> <sup>1</sup> H NMR spectrum of compound 19 | <b>S6.24.</b> <sup>13</sup> C NMR and DEPT spectra of compound 19         |
| <b>S6.25.</b> <sup>1</sup> H NMR spectrum of compound 20 | <b>S6.26.</b> <sup>13</sup> C NMR and DEPT spectra of compound 20         |
| <b>S6.27.</b> HSQC spectrum of compound 20               | <b>S6.28.</b> <sup>1</sup> H– <sup>1</sup> H COSY spectrum of compound 20 |

|                                                               |                                                                          |
|---------------------------------------------------------------|--------------------------------------------------------------------------|
| <b>S6.29.</b> HMBC spectrum of compound <b>20</b>             |                                                                          |
| <b>S6.30.</b> $^1\text{H}$ NMR spectrum of compound <b>21</b> | <b>S6.31.</b> $^{13}\text{C}$ NMR and DEPT spectra of compound <b>21</b> |
| <b>S6.32.</b> $^1\text{H}$ NMR spectrum of compound <b>22</b> | <b>S6.33.</b> $^{13}\text{C}$ NMR and DEPT spectra of compound <b>22</b> |
| <b>S6.34.</b> $^1\text{H}$ NMR spectrum of compound <b>23</b> | <b>S6.35.</b> $^{13}\text{C}$ NMR and DEPT spectra of compound <b>23</b> |
| <b>S6.36.</b> $^1\text{H}$ NMR spectrum of compound <b>24</b> | <b>S6.37.</b> $^{13}\text{C}$ NMR and DEPT spectra of compound <b>24</b> |
| in $\text{CD}_3\text{OD}$                                     |                                                                          |
| <b>S6.38.</b> $^1\text{H}$ NMR spectrum of compound <b>24</b> | <b>S6.39.</b> $^{13}\text{C}$ NMR and DEPT spectra of compound <b>24</b> |
| in $\text{CDCl}_3$                                            |                                                                          |
| <b>S6.40.</b> $^1\text{H}$ NMR spectrum of compound <b>25</b> | <b>S6.41.</b> $^{13}\text{C}$ NMR and DEPT spectra of compound <b>25</b> |
| <b>S6.42.</b> $^1\text{H}$ NMR spectrum of compound <b>26</b> | <b>S6.43.</b> $^{13}\text{C}$ NMR and DEPT spectra of compound <b>26</b> |
| <b>S6.44.</b> $^1\text{H}$ NMR spectrum of compound <b>27</b> | <b>S6.45.</b> $^{13}\text{C}$ NMR and DEPT spectra of compound <b>27</b> |
| in $\text{CD}_3\text{OD}$                                     |                                                                          |
| <b>S6.46.</b> $^1\text{H}$ NMR spectrum of compound <b>28</b> | <b>S6.47.</b> $^{13}\text{C}$ NMR and DEPT spectra of compound <b>28</b> |
| in $\text{CDCl}_3$                                            |                                                                          |
| <b>S6.48.</b> $^1\text{H}$ NMR spectrum of compound <b>29</b> | <b>S6.49.</b> $^{13}\text{C}$ NMR and DEPT spectra of compound <b>29</b> |
| in $\text{CD}_3\text{OD}$                                     |                                                                          |
| <b>S6.50.</b> $^1\text{H}$ NMR spectrum of compound <b>30</b> | <b>S6.51.</b> $^{13}\text{C}$ NMR and DEPT spectra of compound <b>30</b> |
| <b>S6.52.</b> $^1\text{H}$ NMR spectrum of compound <b>31</b> | <b>S6.53.</b> $^{13}\text{C}$ NMR and DEPT spectra of compound <b>31</b> |
| <b>S6.54.</b> $^1\text{H}$ NMR spectrum of compound <b>32</b> |                                                                          |
| in $\text{CDCl}_3$                                            |                                                                          |
| <b>S6.55.</b> $^1\text{H}$ NMR spectrum of compound <b>33</b> | <b>S6.56.</b> $^{13}\text{C}$ NMR and DEPT spectra of compound <b>33</b> |
| <b>S6.57.</b> $^1\text{H}$ NMR spectrum of compound <b>34</b> | <b>S6.58.</b> $^{13}\text{C}$ NMR spectrum of compound <b>34</b>         |
| <b>S6.59.</b> $^1\text{H}$ NMR spectrum of compound <b>35</b> | <b>S6.60.</b> $^{13}\text{C}$ NMR and DEPT spectra of compound <b>35</b> |
| in pyridine- $d_5$                                            |                                                                          |
| <b>S6.61.</b> $^1\text{H}$ NMR spectrum of compound <b>36</b> | <b>S6.62.</b> $^{13}\text{C}$ NMR and DEPT spectra of compound <b>36</b> |
| in $\text{CDCl}_3$                                            |                                                                          |
| <b>S6.63.</b> $^1\text{H}$ NMR spectrum of compound <b>37</b> | <b>S6.64.</b> $^{13}\text{C}$ NMR and DEPT spectra of compound <b>37</b> |
| <b>S6.65.</b> $^1\text{H}$ NMR spectrum of compound <b>38</b> | <b>S6.66.</b> $^{13}\text{C}$ NMR and DEPT spectra of compound <b>38</b> |
| <b>S6.67.</b> $^1\text{H}$ NMR spectrum of compound <b>39</b> | <b>S6.68.</b> $^{13}\text{C}$ NMR spectrum of compound <b>39</b>         |
| <b>S6.9.</b> $^1\text{H}$ NMR spectrum of compound <b>40</b>  | <b>S6.70.</b> $^{13}\text{C}$ NMR spectrum of compound <b>40</b>         |

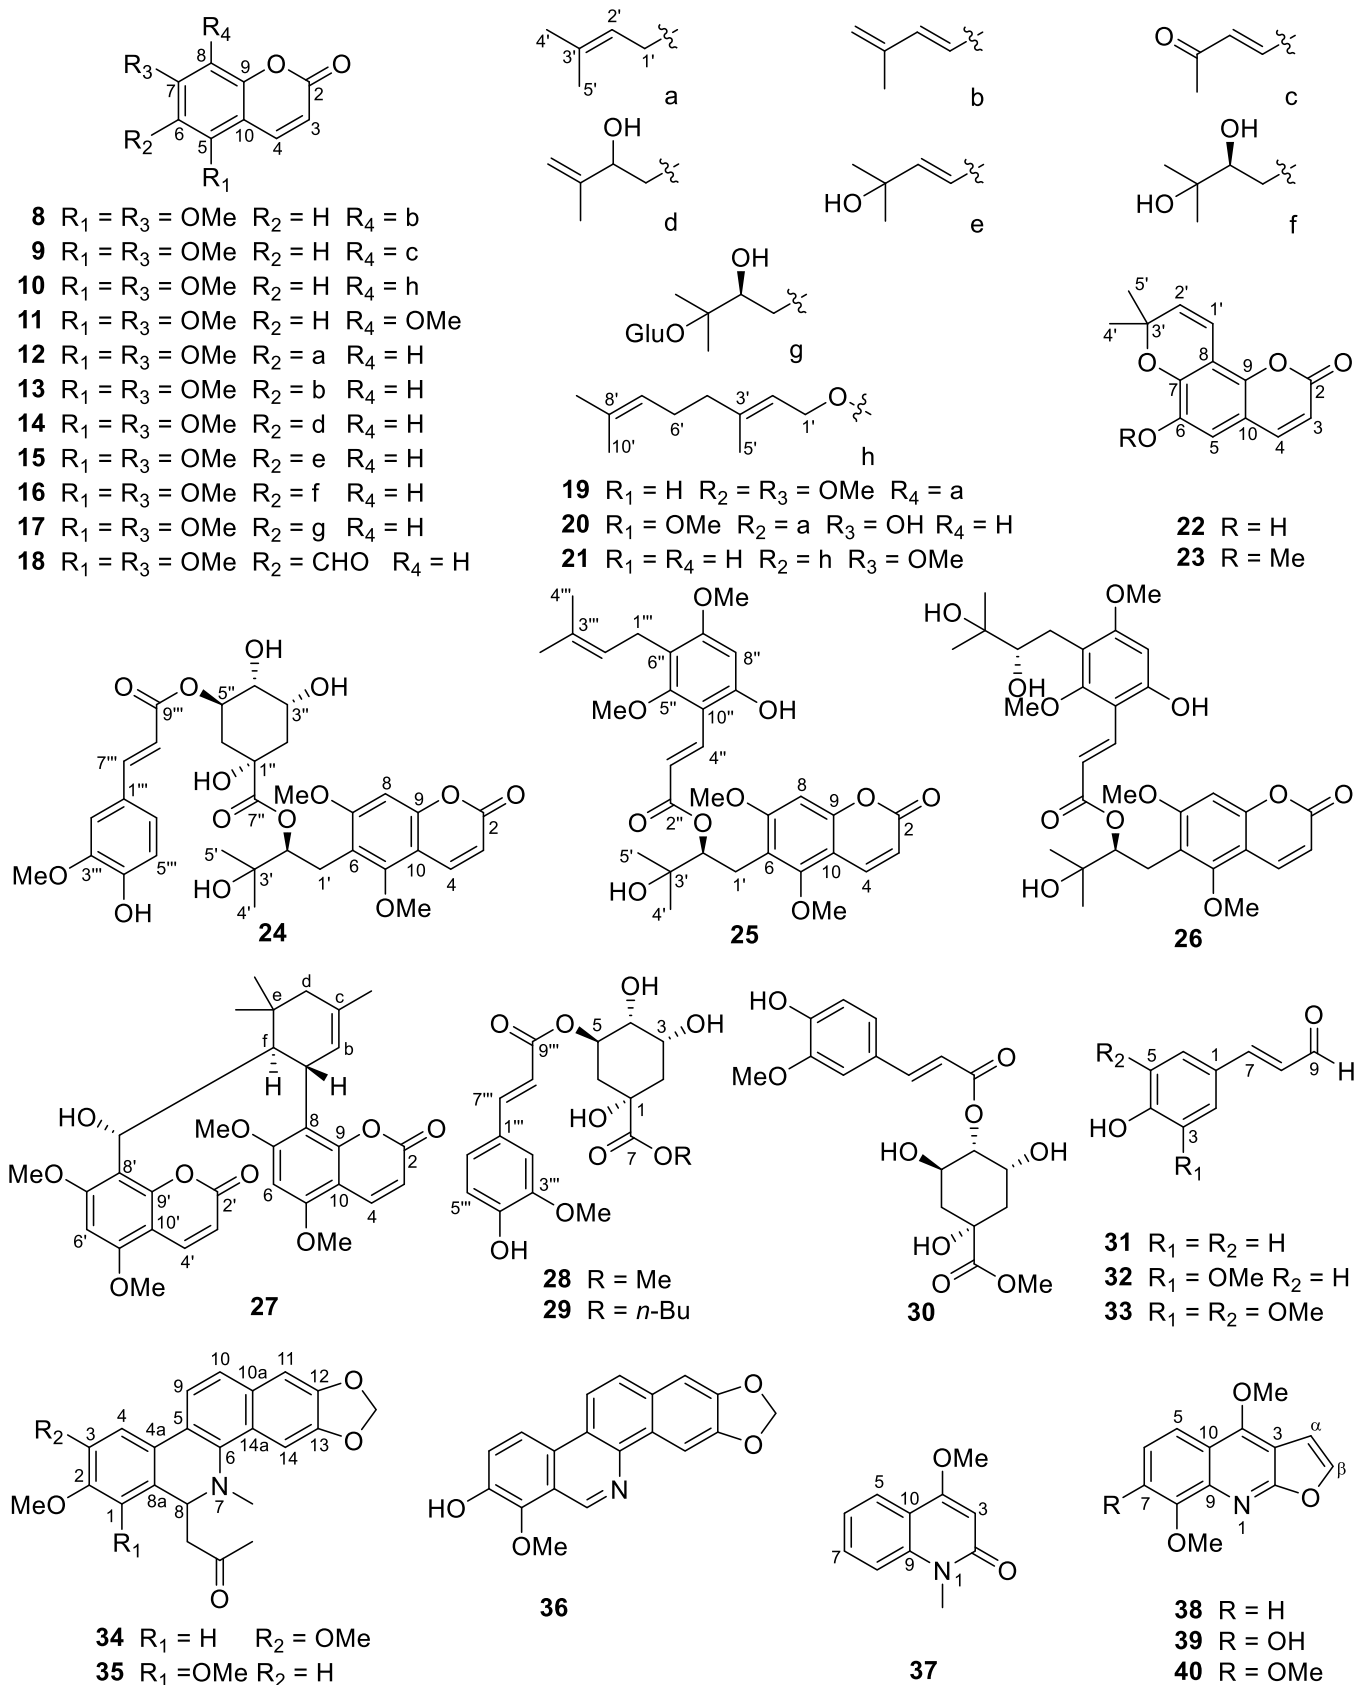

**Fig. S1.1.** Known compounds (**8–40**) from the stem of *Toddalia asiatica*

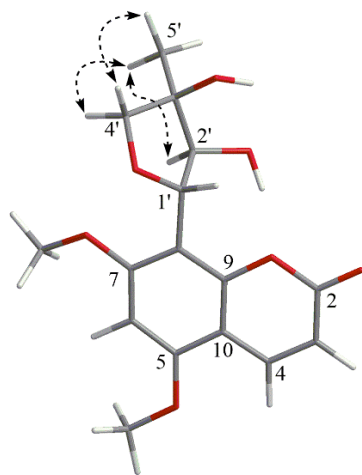

**Fig. S1.2.** Key NOE correlations of compound **2**

**Table S2.1.** <sup>1</sup>H NMR spectroscopic data of **8**, **9**, **11–16**, and **18–23** in CDCl<sub>3</sub> (400 MHz, *J* in Hz,  $\delta$  in ppm)

| position | <b>8</b>                 | <b>9</b>          | <b>11</b>        | <b>12</b>        | <b>13</b>          | <b>14</b>               | <b>15</b>         | <b>16</b>                                        | <b>18</b>        | <b>19</b>                                 | <b>20</b>        | <b>22</b>         | <b>23</b>         |
|----------|--------------------------|-------------------|------------------|------------------|--------------------|-------------------------|-------------------|--------------------------------------------------|------------------|-------------------------------------------|------------------|-------------------|-------------------|
| 3        | 6.14, d<br>(9.6)         | 6.18, d<br>(9.7)  | 6.16, d<br>(9.7) | 6.21, d<br>(9.6) | 6.25, d<br>(9.7)   | 6.18, d (9.6)           | 6.25, d<br>(9.7)  | 6.23, d (9.6)                                    | 6.30, d<br>(9.7) | 6.28, d<br>(9.5)                          | 6.22, d<br>(9.6) | 6.22, d<br>(9.4)  | 6.24, d<br>(9.4)  |
| 4        | 7.96, d<br>(9.6)         | 7.97, d<br>(9.7)  | 7.98, d<br>(9.7) | 7.86, d<br>(9.6) | 7.92, d<br>(9.7)   | 7.81, d (9.6)           | 7.91, d<br>(9.7)  | 7.83, d (9.6)                                    | 7.96, d<br>(9.7) | 7.58, d<br>(9.5)                          | 7.90, d<br>(9.6) | 7.53, d<br>(9.4)  | 7.57, d<br>(9.4)  |
| 5        |                          |                   |                  |                  |                    |                         |                   |                                                  |                  | 6.77, s                                   |                  | 6.83, s           | 6.76, s           |
| 6        | 6.30, s                  | 6.32, s           | 6.34, s          |                  |                    |                         |                   |                                                  |                  |                                           |                  |                   |                   |
| 8        |                          |                   |                  | 6.60, s          | 6.63, s            | 6.58, s                 | 6.62, s           | 6.63, s                                          | 6.66, s          |                                           | 6.81, s          |                   |                   |
| 1'       | 7.36, d<br>(16.6)        | 7.92, d<br>(16.6) |                  | 3.34, d<br>(6.9) | 6.65, d<br>(16.5)  | 2.91, dd (13.6,<br>4.2) | 6.75, d<br>(16.5) | 2.90, dd (13.7, 2.4)<br>2.74, dd (13.7,<br>10.3) | 10.42, s         | 3.53, d<br>(7.3)                          | 3.42, d<br>(6.8) | 6.79, d<br>(10.1) | 6.87, d<br>(10.0) |
| 2'       | 6.79, d<br>(16.6)        | 7.23, d<br>(16.6) |                  | 5.12, t<br>(6.9) | 7.25, d<br>(16.5)  | 4.25, dd (8.6,<br>4.2)  | 6.69, d<br>(16.5) | 3.59, ddd (10.3, 4.6,<br>2.4)                    |                  | 5.20, t<br>(7.2)                          | 5.22, t<br>(6.8) | 5.68, d<br>(10.1) | 5.74, d<br>(10.0) |
| 4'       | 5.13, br.s<br>5.06, br.s | 2.40, s           |                  | 1.67, s          | 5.12, s<br>5.11, s | 4.88, s<br>4.76, s      | 1.44, s           | 1.29, s                                          |                  | 1.64, s                                   | 1.73, s          | 1.45, s           | 1.51, s           |
| 5'       | 2.01, s                  |                   |                  | 1.76, s          | 2.00, s            | 1.79, s                 | 1.44, s           | 1.27, s                                          |                  | 1.82, s                                   | 1.82, s          | 1.45, s           | 1.51, s           |
| 5-OMe    | 3.95, s                  | 3.99, s           | 3.91, s          | 3.81, s          | 3.79, s            | 3.83, s                 | 3.78, s           | 3.86, s                                          | 3.97, s          |                                           | 3.83, s          |                   |                   |
| 6-OMe    |                          |                   |                  |                  |                    |                         |                   |                                                  |                  | 3.87, s                                   |                  |                   | 3.88, s           |
| 7-OMe    | 3.93, s                  | 3.98, s           | 3.96, s          | 3.87, s          | 3.92, s            | 3.85, s                 | 3.90, s           | 3.88, s                                          | 3.98, s          | 3.87, s                                   |                  |                   |                   |
| 8-OMe    |                          |                   | 3.91, s          |                  |                    |                         |                   |                                                  |                  | 2'-OH, 2.63, d (4.6)<br>4'-OH, 2.38, br.s |                  |                   |                   |



**Table S2.2.**  $^{13}\text{C}$  NMR spectroscopic data of **8**, **9**, **11–16**, and **18–23** in  $\text{CDCl}_3$  (100 MHz,  $\delta$  in ppm)

| position | <b>8</b>               | <b>9</b>               | <b>11</b>             | <b>12</b>             | <b>13</b>              | <b>14</b>              | <b>15</b>             | <b>16</b>             | <b>18</b>             | <b>19</b>             | <b>20</b>             | <b>22</b>             | <b>23</b>             |
|----------|------------------------|------------------------|-----------------------|-----------------------|------------------------|------------------------|-----------------------|-----------------------|-----------------------|-----------------------|-----------------------|-----------------------|-----------------------|
| 2        | 161.1, C               | 160.5, C               | 161.0, C              | 161.4, C              | 161.2, C               | 161.0, C               | 161.2, C              | 161.1, C              | 160.4, C              | 161.3, C              | 162.3, C              | 161.6, C              | 161.4, C              |
| 3        | 110.8, CH              | 111.4, CH              | 111.4, CH             | 112.3, CH             | 112.8, CH              | 112.5, CH              | 112.9, CH             | 112.8, CH             | 113.7, CH             | 114.8, CH             | 111.8, CH             | 115.2, CH             | 115.3, CH             |
| 4        | 138.7, CH              | 138.7, CH              | 138.9, CH             | 139.1, CH             | 139.0, CH              | 138.9, CH              | 139.0, CH             | 138.9, CH             | 138.5, CH             | 143.5, CH             | 139.8, CH             | 144.1, CH             | 143.9, CH             |
| 5        | 155.6, C               | 158.4, C               | 156.2, C              | 155.3, C              | 155.7, C               | 156.1, C               | 155.7, C              | 156.1, C              | 159.7, C              | 107.1, CH             | 155.8, C              | 111.5, CH             | 108.6, CH             |
| 6        | 90.4, CH               | 90.3, CH               | 91.5, CH              | 120.4, C              | 116.7, C               | 117.5, C               | 116.2, C              | 118.0, C              | 115.4, C              | 147.5, C              | 118.7, C              | 143.9, C              | 146.6, C              |
| 7        | 161.2, C               | 163.2, C               | 148.8, C              | 161.8, C              | 161.7, C               | 161.7, C               | 161.6, C              | 161.6, C              | 160.0, C              | 149.9, C              | 160.0, C              | 141.9, C              | 145.8, C              |
| 8        | 107.2, C               | 104.7, C               | 130.2, C              | 95.5, CH              | 95.7, CH               | 95.5, CH               | 95.6, CH              | 95.8, CH              | 96.0, CH              | 124.5, C              | 100.0, CH             | 109.5, C              | 110.4, C              |
| 9        | 153.4, C               | 155.0, C               | 152.5, C              | 154.8, C              | 154.9, C               | 155.0, C               | 155.0, C              | 155.1, C              | 165.1, C              | 150.7, C              | 154.4, C              | 143.4, C              | 145.0, C              |
| 10       | 103.8, C               | 103.9, C               | 104.1, C              | 107.2, C              | 107.7, C               | 107.1, C               | 107.7, C              | 107.3, C              | 108.1, C              | 114.6, C              | 107.2, C              | 112.1, C              | 111.5, C              |
| 1'       | 135.6, CH              | 131.9, CH              |                       | 22.8, CH <sub>2</sub> | 118.3, CH              | 30.2, CH <sub>2</sub>  | 115.5, CH             | 26.2, CH <sub>2</sub> | 187.6, CH             | 22.8, CH <sub>2</sub> | 23.0, CH <sub>2</sub> | 113.3, CH             | 113.3, CH             |
| 2'       | 117.1, CH              | 129.9, CH              |                       | 122.3, CH             | 137.0, CH              | 75.1, CH               | 143.1, CH             | 78.1, CH              |                       | 121.4, CH             | 121.6, CH             | 130.7, CH             | 131.0, CH             |
| 3'       | 143.3, C               | 200.1, C               |                       | 132.1, C              | 143.1, C               | 147.5, C               | 71.6, C               | 73.0, C               |                       | 132.7, C              | 134.6, C              | 78.8, C               | 78.1, C               |
| 4'       | 117.0, CH <sub>2</sub> | 27.7, CH <sub>3</sub>  |                       | 25.8, CH <sub>3</sub> | 117.9, CH <sub>2</sub> | 110.4, CH <sub>2</sub> | 30.0, CH <sub>3</sub> | 26.3, CH <sub>3</sub> |                       | 25.8, CH <sub>3</sub> | 25.9, CH <sub>3</sub> | 28.1, CH <sub>3</sub> | 28.1, CH <sub>3</sub> |
| 5'       | 18.4, CH <sub>3</sub>  |                        |                       | 18.0, CH <sub>3</sub> | 18.4, CH <sub>3</sub>  | 17.9, CH <sub>3</sub>  | 30.0, CH <sub>3</sub> | 23.7, CH <sub>3</sub> |                       | 18.0, CH <sub>3</sub> | 18.1, CH <sub>3</sub> | 28.1, CH <sub>3</sub> | 28.1, CH <sub>3</sub> |
| 5-OMe    | 55.9, CH <sub>3</sub>  | 56.27, CH <sub>3</sub> | 61.8, CH <sub>3</sub> | 63.2, CH <sub>3</sub> | 62.1, CH <sub>3</sub>  | 63.2, CH <sub>3</sub>  | 61.9, CH <sub>3</sub> | 63.3, CH <sub>3</sub> | 64.8, CH <sub>3</sub> |                       | 63.4, CH <sub>3</sub> |                       |                       |
| 6-OMe    |                        |                        |                       |                       |                        |                        |                       |                       |                       | 56.1, CH <sub>3</sub> |                       |                       | 56.6, CH <sub>3</sub> |
| 7-OMe    | 56.0, CH <sub>3</sub>  | 56.34, CH <sub>3</sub> | 56.6, CH <sub>3</sub> | 56.2, CH <sub>3</sub> | 56.3, CH <sub>3</sub>  | 56.1, CH <sub>3</sub>  | 56.3, CH <sub>3</sub> | 56.4, CH <sub>3</sub> | 56.8, CH <sub>3</sub> | 61.1, CH <sub>3</sub> |                       |                       |                       |
| 8-OMe    |                        |                        | 56.2, CH <sub>3</sub> |                       |                        |                        |                       |                       |                       |                       |                       |                       |                       |

**Table S2.3.**  $^1\text{H}$  NMR (400 MHz) and  $^{13}\text{C}$  NMR (100 MHz) spectroscopic data of **10**, **17**, and **21** ( $J$  in Hz,  $\delta$  in ppm)

| position | <b>10<sup>a</sup></b>                     |                            | <b>17<sup>b</sup></b>                     |                            | <b>21<sup>a</sup></b>                     |                            | position | <b>10<sup>a</sup></b>                     |                            | <b>17<sup>b</sup></b>                         |                            | <b>21<sup>a</sup></b>                     |                            |
|----------|-------------------------------------------|----------------------------|-------------------------------------------|----------------------------|-------------------------------------------|----------------------------|----------|-------------------------------------------|----------------------------|-----------------------------------------------|----------------------------|-------------------------------------------|----------------------------|
|          | $\delta_{\text{H}}$ , multi. ( $J$ in Hz) | $\delta_{\text{C}}$ , type | $\delta_{\text{H}}$ , multi. ( $J$ in Hz) | $\delta_{\text{C}}$ , type | $\delta_{\text{H}}$ , multi. ( $J$ in Hz) | $\delta_{\text{C}}$ , type |          | $\delta_{\text{H}}$ , multi. ( $J$ in Hz) | $\delta_{\text{C}}$ , type | $\delta_{\text{H}}$ , multi. ( $J$ in Hz)     | $\delta_{\text{C}}$ , type | $\delta_{\text{H}}$ , multi. ( $J$ in Hz) | $\delta_{\text{C}}$ , type |
| 2        |                                           | 160.9, C                   |                                           | 163.3, C                   |                                           | 161.5, C                   | 1'       | 4.59, d (7.2)                             | 70.0, CH <sub>2</sub>      | 2.90, dd (13.6, 10.1)<br>2.76, dd (13.6, 2.6) | 27.1, CH <sub>2</sub>      | 4.65, d (6.3)                             | 66.3, CH <sub>2</sub>      |
| 3        | 6.12, d (9.7)                             | 111.2, CH                  | 6.22, d (9.6)                             | 112.5, CH                  | 6.21, d (9.4)                             | 113.3, CH                  | 2'       | 5.57, br.t (7.5)                          | 119.9, CH                  | 3.83, dd (13.6, 2.6)                          | 77.4, CH                   | 5.44, br.t (5.7)                          | 118.5, CH                  |
| 4        | 7.94, d (9.7)                             | 138.8, CH                  | 8.00, d (9.6)                             | 141.2, CH                  | 7.58, d (9.4)                             | 143.4, CH                  | 3'       |                                           | 142.5, C                   |                                               | 81.9, C                    |                                           | 142.0, C                   |
| 5        |                                           | 152.4, C                   |                                           | 157.6, C                   | 6.77, s                                   | 108.2, CH                  | 4'       | 1.65, s                                   | 16.5, CH <sub>3</sub>      | 1.37, s                                       | 21.8, CH <sub>3</sub>      | 1.72, s                                   | 16.8, CH <sub>3</sub>      |
| 6        | 6.31, s                                   | 91.5, CH                   |                                           | 120.2, C                   |                                           | 146.7, C                   | 5'       | 2.01, m                                   | 39.7, CH <sub>2</sub>      | 1.37, s                                       | 23.9, CH <sub>3</sub>      | 2.05, m                                   | 39.5, CH <sub>2</sub>      |
| 7        |                                           | 156.7, C                   |                                           | 163.6, C                   |                                           | 149.9, C                   | 6'/1''   | 2.01, m                                   | 26.6, CH <sub>2</sub>      | 4.59, d (7.7)                                 | 98.6, CH                   | 2.05, m                                   | 26.2, CH <sub>2</sub>      |
| 8        |                                           | 128.9, C                   | 6.72, s                                   | 96.3, CH                   | 6.82, s                                   | 101.2, CH                  | 7'/2''   | 5.03, br.t (6.8)                          | 124.0, CH                  | 3.23, dd (9.2, 7.7)                           | 75.1, CH                   | 5.02, br.t (6.9)                          | 123.7, CH                  |
| 9        |                                           | 149.3, C                   |                                           | 156.1, C                   |                                           | 152.2, C                   | 8'/3''   |                                           | 131.7, C                   | 3.41, m                                       | 78.0, CH                   |                                           | 131.9, C                   |
| 10       |                                           | 104.0, C                   |                                           | 108.3, C                   |                                           | 111.3, C                   | 9'/4''   | 1.65, s                                   | 25.8, CH <sub>3</sub>      | 3.31, m                                       | 71.6, CH                   | 1.60, s                                   | 25.6, CH <sub>3</sub>      |
| 5-OMe    | 3.89, s                                   | 56.1, CH <sub>3</sub>      | 3.91, s                                   | 63.9, CH <sub>3</sub>      |                                           |                            | 10'/5''  | 1.57, s                                   | 17.8, CH <sub>3</sub>      | 3.33, m                                       | 77.8, CH                   | 1.55, s                                   | 17.7, CH <sub>3</sub>      |
| 7-OMe    | 3.94, s                                   | 56.6, CH <sub>3</sub>      | 3.91, s                                   | 56.7, CH <sub>3</sub>      | 3.86, s                                   | 56.4, CH <sub>3</sub>      | 6''      |                                           |                            | 3.82, m<br>3.66, m                            | 62.6, CH <sub>2</sub>      |                                           |                            |

<sup>a</sup> In CDCl<sub>3</sub>; <sup>b</sup> In CD<sub>3</sub>OD.

**Table S2.4.**  $^1\text{H}$  NMR (400 MHz) and  $^{13}\text{C}$  NMR (100 MHz) spectroscopic data of **24** ( $J$  in Hz,  $\delta$  in ppm)

| position | <b>24<sup>a</sup></b>            |                            | <b>24<sup>b</sup></b>            |                            |
|----------|----------------------------------|----------------------------|----------------------------------|----------------------------|
|          | $\delta_{\text{H}}$ ( $J$ in Hz) | $\delta_{\text{C}}$ , type | $\delta_{\text{H}}$ ( $J$ in Hz) | $\delta_{\text{C}}$ , type |
| 2        |                                  | 163.0, C                   |                                  | 161.1, C                   |
| 3        | 6.10, d (9.5)                    | 112.9, CH                  | 6.22, d (9.6)                    | 112.9, CH                  |
| 4        | 7.86, d (9.5)                    | 140.7, CH                  | 7.71, d (9.6)                    | 138.7, CH                  |
| 5        |                                  | 157.6, C                   |                                  | 156.0, C                   |
| 6        |                                  | 117.9, C                   |                                  | 116.3, C                   |
| 7        |                                  | 163.6, C                   |                                  | 162.0, C                   |
| 8        | 6.61, s                          | 96.4, CH                   | 6.54, s                          | 95.7, CH                   |
| 9        |                                  | 156.4, C                   |                                  | 155.2, C                   |
| 10       |                                  | 108.2, C                   |                                  | 107.0, C                   |
| 1'a      | 3.19, t (12.3)                   | 24.4, CH <sub>2</sub>      | 3.17, dd (13.4 11.0)             | 23.5, CH <sub>2</sub>      |
| 1'b      | 2.90, d (13.6)                   |                            | 2.90, dd (13.4, 2.4)             |                            |
| 2'       | 5.27, d (11.1)                   | 80.1, CH                   | 5.20, dd (11.0, 2.4)             | 79.6, CH                   |
| 3'       |                                  | 72.9, C                    |                                  | 72.2, C                    |
| 4'       | 1.30, s                          | 25.9, CH <sub>3</sub>      | 1.35, s                          | 25.3, CH <sub>3</sub>      |
| 5'       | 1.24, s                          | 26.4, CH <sub>3</sub>      | 1.26, s                          | 27.0, CH <sub>3</sub>      |
| 1''      |                                  | 76.9, C                    |                                  | 76.3, C                    |
| 2''a     | 1.78, d (14.2)                   | 37.9, CH <sub>2</sub>      | 1.95, m                          | 36.6, CH <sub>2</sub>      |
| 2''b     | 1.95, d (14.2)                   |                            | 1.95, m                          |                            |
| 3''      | 4.06, br. s                      | 71.5, CH                   | 4.15, br. s                      | 70.7, CH                   |
| 4''      | 3.58, d (9.3)                    | 73.8, CH                   | 3.57, d (9.5)                    | 73.6, CH                   |
| 5''      | 5.22, m                          | 71.6, CH                   | 5.26, ddd (11.3, 9.5, 4.4)       | 70.6, CH                   |
| 6''a     | 2.00, m                          | 39.5, CH <sub>2</sub>      | 1.95, m                          | 38.7, CH <sub>2</sub>      |
| 6''b     | 1.46, t (12.0)                   |                            | 1.95, m                          |                            |
| 7''      |                                  | 174.2, C                   |                                  | 172.6, C                   |
| 1'''     |                                  | 127.6, C                   |                                  | 126.7, C                   |
| 2'''     | 7.18, s                          | 111.7, CH                  | 7.05, d (1.8)                    | 109.7, CH                  |
| 3'''     |                                  | 149.3, C                   |                                  | 146.1, C                   |
| 4'''     |                                  | 150.7, C                   |                                  | 148.5, C                   |
| 5'''     | 6.81, d (8.0)                    | 116.5, CH                  | 6.87, d (8.2)                    | 114.9, CH                  |
| 6'''     | 7.05, d (8.0)                    | 124.2, CH                  | 7.01, dd (8.2, 1.8)              | 123.6, CH                  |
| 7'''     | 7.56, d (15.9)                   | 146.9, CH                  | 7.57, d (15.8)                   | 147.1, CH                  |
| 8'''     | 6.25, d (15.9)                   | 115.5, CH                  | 6.22, d (15.8)                   | 114.8, CH                  |
| 9'''     |                                  | 168.5, C                   |                                  | 167.6, C                   |
| 5-OMe    | 3.85, s                          | 63.7, CH <sub>3</sub>      | 3.86, s                          | 63.4, CH <sub>3</sub>      |
| 7-OMe    | 3.85, s                          | 56.8, CH <sub>3</sub>      | 3.81, s                          | 56.4, CH <sub>3</sub>      |
| 3'''-OMe | 3.90, s                          | 56.5, CH <sub>3</sub>      | 3.90, s                          | 56.1, CH <sub>3</sub>      |

<sup>a</sup> In CD<sub>3</sub>OD; <sup>b</sup> In CDCl<sub>3</sub>.

**Table S2.5.**  $^1\text{H}$  NMR (400 MHz) and  $^{13}\text{C}$  NMR (100 MHz) spectroscopic data of **25** and **26** in  $\text{CDCl}_3$  ( $J$  in Hz,  $\delta$  in ppm)

| position | <b>25</b>                        |                            | <b>26</b>                        |                            |
|----------|----------------------------------|----------------------------|----------------------------------|----------------------------|
|          | $\delta_{\text{H}}$ ( $J$ in Hz) | $\delta_{\text{C}}$ , type | $\delta_{\text{H}}$ ( $J$ in Hz) | $\delta_{\text{C}}$ , type |
| 2        |                                  | 161.6, C                   |                                  | 161.6, C                   |
| 3        | 6.13, d (9.6)                    | 112.3, CH                  | 6.09, d (9.6)                    | 112.1, CH                  |
| 4        | 7.75, d (9.6)                    | 139.1, CH                  | 7.74, d (9.6)                    | 139.3, CH                  |
| 5        |                                  | 156.2, C                   |                                  | 156.3, C                   |
| 6        |                                  | 117.0, C                   |                                  | 117.1, C                   |
| 7        |                                  | 162.2, C                   |                                  | 162.3, C                   |
| 8        | 6.53, s                          | 95.6, CH                   | 6.49, s                          | 95.5, CH                   |
| 9        |                                  | 155.3, C                   |                                  | 155.2, C                   |
| 10       |                                  | 107.1, C                   |                                  | 107.1, C                   |
| 1'a      | 2.95, dd (13.6, 2.5)             | 24.1, $\text{CH}_2$        | 2.93, dd (13.3)                  | 24.2, $\text{CH}_2$        |
| 1'b      | 3.17, dd (13.6, 10.2)            |                            | 3.14, t (13.3)                   |                            |
| 2'       | 5.29, dd (10.2, 2.5)             | 78.3, CH                   | 5.29, d (10.0)                   | 78.5, CH                   |
| 3'       |                                  | 73.0, C                    |                                  | 72.9, C                    |
| 4'       | 1.38, s                          | 25.3, $\text{CH}_3$        | 1.37, s                          | 25.3, $\text{CH}_3$        |
| 5'       | 1.34, s                          | 26.9, $\text{CH}_3$        | 1.33, s                          | 26.8, $\text{CH}_3$        |
| 2''      |                                  | 168.6, C                   |                                  | 168.7, C                   |
| 3''      | 6.60, d (16.2)                   | 117.0, CH                  | 6.59, d (16.1)                   | 117.9, CH                  |
| 4''      | 7.75, d (16.2)                   | 137.3, CH                  | 7.66, d (16.0)                   | 137.1, CH                  |
| 5''      |                                  | 159.4, C                   |                                  | 159.8, C                   |
| 6''      |                                  | 116.2, C                   |                                  | 112.8, C                   |
| 7''      |                                  | 160.7, C                   |                                  | 160.4, C                   |
| 8''      | 6.19, s                          | 95.9, CH                   | 6.15, s                          | 96.2, CH                   |
| 9''      |                                  | 156.5, C                   |                                  | 157.7, C                   |
| 10''     |                                  | 108.4, C                   |                                  | 108.5, C                   |
| 1'''a    | 3.22, d (6.7)                    | 22.6, $\text{CH}_2$        | 2.57, q (11.6)                   | 25.8, $\text{CH}_2$        |
| 1'''b    |                                  |                            | 2.78, t (11.6)                   |                            |
| 2'''     | 5.10, t (6.4)                    | 123.4, CH                  | 3.50, m                          | 78.8, CH                   |
| 3'''     |                                  | 131.3, C                   |                                  | 73.2, C                    |
| 4'''     | 1.65, s                          | 25.9, $\text{CH}_3$        | 1.26, s                          | 26.1, $\text{CH}_3$        |
| 5'''     | 1.74, s                          | 17.9, $\text{CH}_3$        | 1.25 s                           | 23.9, $\text{CH}_3$        |
| 5-OMe    | 3.86, s                          | 63.5, $\text{CH}_3$        | 3.84, s                          | 63.4, $\text{CH}_3$        |
| 7-OMe    | 3.84, s                          | 56.4, $\text{CH}_3$        | 3.81, s                          | 56.4, $\text{CH}_3$        |
| 5''-OMe  | 3.59, s                          | 61.7, $\text{CH}_3$        | 3.59, s                          | 61.7, $\text{CH}_3$        |
| 7''-OMe  | 3.76, s                          | 55.7, $\text{CH}_3$        | 3.65, s                          | 55.8, $\text{CH}_3$        |

**Table S2.6.**  $^1\text{H}$  NMR (400 MHz) and  $^{13}\text{C}$  NMR (100 MHz) spectroscopic data of **27** in  $\text{CDCl}_3$  ( $J$  in Hz,  $\delta$  in ppm)

| position        | <b>27</b>                                 |  | position        | <b>27</b>                                 |  |
|-----------------|-------------------------------------------|--|-----------------|-------------------------------------------|--|
|                 | $\delta_{\text{H}}$ , multi. ( $J$ in Hz) |  |                 | $\delta_{\text{C}}$ , type                |  |
| 3               | 5.88, d (9.5)                             |  | 2/2'            | 160.8 and 160.8, C                        |  |
| 4               | 7.70, d (9.5)                             |  | 3/3'            | 108.8 and 109.1, CH                       |  |
| 6               | 6.07, s                                   |  | 4/4'            | 138.7 and 138.7, CH                       |  |
| 3'              | 5.74, d (9.6)                             |  | 5/5'            | 161.7 and 162.1, C                        |  |
| 4'              | 7.56, d (9.6)                             |  | 6/6'            | 89.7 and 90.6, CH                         |  |
| 6'              | 6.06, s                                   |  | 7/7'            | 155.4 and 152.6, C                        |  |
| a               | 3.54, d (10.3)                            |  | 8/8'            | 111.8 and 113.0, C                        |  |
| b               | 4.76, br. s                               |  | 9/9'            | 154.7 and 154.9, C                        |  |
| d               | 2.26, d (16.6)                            |  | 10/10'          | 102.9 and 102.7, C                        |  |
|                 | 1.58, d (16.6)                            |  |                 |                                           |  |
| f               | 3.13, dd (10.3, 8.3)                      |  | a               | 50.5, CH                                  |  |
| g               | 5.35, d (8.3)                             |  | b               | 122.0, CH                                 |  |
| c-Me            | 1.59, s                                   |  | c               | 131.5, C                                  |  |
| e-Me $\times$ 2 | 1.35 and 1.13, each s                     |  | d               | 47.5, $\text{CH}_2$                       |  |
| 5/7/5'/7'-OMe   | 4.03, 3.93, 3.78, and 3.76, each s        |  | e               | 35.1, C                                   |  |
|                 |                                           |  | f               | 33.0, CH                                  |  |
|                 |                                           |  | g               | 67.6, CH                                  |  |
|                 |                                           |  | c-Me            | 20.8, $\text{CH}_3$                       |  |
|                 |                                           |  | e-Me $\times$ 2 | 23.7 and 31.9, $\text{CH}_3$              |  |
|                 |                                           |  | 5/7/5'/7'-OMe   | 56.2, 55.8, 55.7, and 55.5, $\text{CH}_3$ |  |

**Table S2.7.**  $^1\text{H}$  NMR (400 MHz) and  $^{13}\text{C}$  NMR (100 MHz) spectroscopic data of **28–30** ( $J$  in Hz,  $\delta$  in ppm)

| position        | <b>28<sup>a</sup></b>                        |                            | <b>29<sup>b</sup></b>                        |                            | <b>30<sup>a</sup></b>                     |                            |
|-----------------|----------------------------------------------|----------------------------|----------------------------------------------|----------------------------|-------------------------------------------|----------------------------|
|                 | $\delta_{\text{H}}$ , multi. ( $J$ in Hz)    | $\delta_{\text{C}}$ , type | $\delta_{\text{H}}$ , multi. ( $J$ in Hz)    | $\delta_{\text{C}}$ , type | $\delta_{\text{H}}$ , multi. ( $J$ in Hz) | $\delta_{\text{C}}$ , type |
| 1               |                                              | 75.9, C                    |                                              | 75.8, C                    |                                           | 76.4, C                    |
| 2               | 2.15, dd (13.4, 8.6)<br>2.04, dd (13.4, 6.4) | 37.95, CH <sub>2</sub>     | 2.21, dd (14.7, 2.3)<br>2.08, dd (14.7, 92.) | 37.2, CH <sub>2</sub>      | 2.10–2.19, m                              | 42.1, CH <sub>2</sub>      |
| 3               | 4.17, m                                      | 70.5, CH                   | 4.20, m                                      | 70.8, CH                   | 4.21, dd (9.1, 4.3)                       | 65.7, CH                   |
| 4               | 3.76, dd (7.8, 3.1)                          | 72.7, CH                   | 3.69, dd (9.8, 2.9)                          | 74.1, CH                   | 4.79, dd (8.7, 3.1)                       | 78.5, CH                   |
| 5               | 5.39, ddd (9.5, 7.8, 3.1)                    | 72.1, CH                   | 5.39, ddd (12.3, 9.8, 4.1)                   | 70.9, CH                   | 4.30, m                                   | 69.0, CH                   |
| 6               | 2.23, dd (9.5, 3.8)                          | 38.04, CH <sub>2</sub>     | 2.31, dd (12.3, 4.1)<br>1.92, t (12.3)       | 38.9, CH <sub>2</sub>      | 1.98–2.03, m                              | 38.4, CH <sub>2</sub>      |
| 7               |                                              | 175.4, C                   |                                              | 174.3, C                   |                                           | 175.7, C                   |
| 1'              |                                              | 168.3, C                   |                                              | 167.6, C                   |                                           | 168.9, C                   |
| 2'              | 6.33, d (15.9)                               | 116.5, CH                  | 6.30, d (15.9)                               | 115.2, CH                  | 6.41, d (15.9)                            | 116.5, CH                  |
| 3'              | 7.61, d (15.9)                               | 147.0, CH                  | 7.63, d (15.9)                               | 145.9, CH                  | 7.65, d (15.9)                            | 147.0, CH                  |
| 4'              |                                              | 127.6, C                   |                                              | 127.0, C                   |                                           | 127.8, C                   |
| 5'              | 7.19, s                                      | 111.7, CH                  | 7.01, s                                      | 109.6, CH                  | 7.16, d (1.9)                             | 111.7, CH                  |
| 6'              |                                              | 149.4, C                   |                                              | 147.0, C                   |                                           | 149.4, C                   |
| 7'              |                                              | 150.7, C                   |                                              | 148.3, C                   |                                           | 150.6, C                   |
| 8'              | 6.83, d (8.1)                                | 115.4, CH                  | 6.90, d (8.1)                                | 114.9, CH                  | 6.77, d (8.2)                             | 115.6, CH                  |
| 9'              | 7.08, d (8.1)                                | 124.1, CH                  | 7.04, dd (8.1)                               | 123.4, CH                  | 7.05, dd (8.2, 1.9)                       | 124.1, CH                  |
| 7-              | 3.72, s                                      | 53.0, CH <sub>3</sub>      | 4.18, m                                      | 66.5, CH <sub>2</sub>      | 3.71, s                                   | 53.0, CH <sub>3</sub>      |
| OMe/-           |                                              |                            | 1.65, m                                      | 30.6, CH <sub>2</sub>      |                                           |                            |
| O- <i>n</i> -Bu |                                              |                            | 1.37, m                                      | 19.1, CH <sub>2</sub>      |                                           |                            |
|                 |                                              |                            | 0.94, t (7.2)                                | 13.8, CH <sub>3</sub>      |                                           |                            |
| 6'-OMe          | 3.90, s                                      | 56.5, CH <sub>3</sub>      | 3.90, s                                      | 56.1, CH <sub>3</sub>      | 3.85, s                                   | 56.4, CH <sub>3</sub>      |

<sup>a</sup> In CD<sub>3</sub>OD; <sup>b</sup> In CDCl<sub>3</sub>.**Table S2.8.**  $^1\text{H}$  NMR (400 MHz) and  $^{13}\text{C}$  NMR (100 MHz) spectroscopic data of **31–33** ( $J$  in Hz,  $\delta$  in ppm)

| position | <b>31<sup>a</sup></b>                     |                            | <b>32<sup>a</sup></b>                     |                            | <b>33<sup>b</sup></b>                     |                            |
|----------|-------------------------------------------|----------------------------|-------------------------------------------|----------------------------|-------------------------------------------|----------------------------|
|          | $\delta_{\text{H}}$ , multi. ( $J$ in Hz) | $\delta_{\text{C}}$ , type | $\delta_{\text{H}}$ , multi. ( $J$ in Hz) | $\delta_{\text{C}}$ , type | $\delta_{\text{H}}$ , multi. ( $J$ in Hz) | $\delta_{\text{C}}$ , type |
| 1        |                                           | 127.0, C                   |                                           |                            |                                           | 125.7, C                   |
| 2        | 7.55, d (8.2)                             | 132.0, CH                  | 7.26, s                                   |                            | 6.81, s                                   | 105.7, CH                  |
| 3        | 6.86, d (8.2)                             | 117.1, CH                  |                                           |                            |                                           | 147.5, C                   |
| 4        |                                           | 162.5, C                   |                                           |                            |                                           | 138.1, C                   |
| 5        | 6.86, d (8.2)                             | 117.1, CH                  | 6.85, d (8.2)                             |                            |                                           | 147.5, C                   |
| 6        | 7.55, d (8.2)                             | 132.0, CH                  | 7.18, d (8.2)                             |                            | 6.81, s                                   | 105.7, CH                  |
| 7        | 7.60, d (15.9)                            | 156.0, CH                  | 7.60, d (15.6)                            |                            | 7.38, d (15.7)                            | 153.4, CH                  |
| 8        | 6.63, dd (15.9, 7.9)                      | 126.4, CH                  | 6.65, dd (15.6, 7.8)                      |                            | 6.61, dd (15.7, 7.7)                      | 126.9, CH                  |
| 9        | 9.58, d (7.9)                             | 196.2, CH                  | 9.57, d (7.8)                             |                            | 9.66, d (7.7)                             | 193.6, C                   |
| 3/5-OMe  |                                           |                            |                                           |                            | 3.94, s                                   | 56.5, CH <sub>3</sub>      |
| 4-OMe    |                                           |                            | 3.92, s                                   |                            |                                           |                            |

<sup>a</sup> In CD<sub>3</sub>OD; <sup>b</sup> In CDCl<sub>3</sub>.

**Table S2.9.**  $^1\text{H}$  NMR (400 MHz) and  $^{13}\text{C}$  NMR (100 MHz) spectroscopic data of **34–36** ( $J$  in Hz,  $\delta$  in ppm)

| position             | <b>34<sup>a</sup></b>                      |                                                            | <b>35<sup>a</sup></b>                       |                                                            | <b>36<sup>b</sup></b>                     |                            |
|----------------------|--------------------------------------------|------------------------------------------------------------|---------------------------------------------|------------------------------------------------------------|-------------------------------------------|----------------------------|
|                      | $\delta_{\text{H}}$ , multi. ( $J$ in Hz)  | $\delta_{\text{C}}$ , type                                 | $\delta_{\text{H}}$ , multi. ( $J$ in Hz)   | $\delta_{\text{C}}$ , type                                 | $\delta_{\text{H}}$ , multi. ( $J$ in Hz) | $\delta_{\text{C}}$ , type |
| 1                    | 6.86, s                                    | 100.5, CH                                                  |                                             | 145.7, C                                                   |                                           | 143.9, C                   |
| 2                    |                                            | 148.3, C                                                   |                                             | 152.3, C                                                   |                                           | 149.1, C                   |
| 3                    |                                            | 147.6, C                                                   | 6.96, d (8.5)                               | 100.8, CH                                                  | 8.49, d (8.9)                             | 124.8, CH                  |
| 4                    | 7.31, s                                    | 106.3, CH                                                  | 7.54, d (8.5)                               | 118.9, CH                                                  | 7.85, d (8.9)                             | 119.7, CH                  |
| 4a                   |                                            | 123.5, C                                                   |                                             | 139.5, C                                                   |                                           | 128.0, C                   |
| 5                    |                                            | 126.9, C                                                   |                                             | 128.4, C                                                   |                                           | 121.5, C                   |
| 6                    |                                            | 131.0, C                                                   |                                             | 131.2, C                                                   |                                           | 140.6, C                   |
| 8                    | 4.55, dd (8.7, 5.8)                        | 60.1, CH                                                   | 5.05, dd (11.5, 3.4)                        | 61.1, CH                                                   | 9.19, s                                   | 146.9, CH                  |
| 8a                   |                                            | 123.5, C                                                   |                                             | 123.4, C                                                   |                                           | 123.1, C                   |
| 9                    | 7.70, d (8.5)                              | 119.6, CH                                                  | 7.71, d (8.5)                               | 119.9, CH                                                  | 8.57, d (8.9)                             | 119.5, CH                  |
| 10                   | 7.50, d (8.5)                              | 124.0, CH                                                  | 7.48, d (8.5)                               | 124.0, CH                                                  | 7.99, d (8.9)                             | 124.0, CH                  |
| 10a                  |                                            | 127.2, C                                                   |                                             | 127.5, C                                                   |                                           | 130.3, C                   |
| 11                   | 7.10, s                                    | 104.4, CH                                                  | 7.10, s                                     | 104.5, CH                                                  | 7.47, s                                   | 105.4, CH                  |
| 12                   |                                            | 149.0, C                                                   |                                             | 148.3, C                                                   |                                           | 149.4, C                   |
| 13                   |                                            | 148.7, C                                                   |                                             | 147.7, C                                                   |                                           | 149.4, C                   |
| 14                   | 7.57, s                                    | 110.4, CH                                                  | 7.51, s                                     | 111.7, CH                                                  | 7.58, s                                   | 102.9, CH                  |
| 14a                  |                                            | 123.3, C                                                   |                                             | 123.4, C                                                   |                                           | 130.2, C                   |
| 8-acetyl             | 2.70, dd (15.8, 8.7); 2.32, dd (15.8, 5.8) | 48.4, CH <sub>2</sub><br>208.1, C<br>31.6, CH <sub>3</sub> | 2.57, dd (14.5, 11.5); 2.26, dd (14.5, 3.4) | 47.0, CH <sub>2</sub><br>207.7, C<br>31.2, CH <sub>3</sub> |                                           |                            |
|                      | 1.97, s                                    |                                                            | 2.06, s                                     |                                                            |                                           |                            |
| 1-OMe                |                                            |                                                            | 3.96, s                                     | 55.1, CH <sub>3</sub>                                      | 4.12, s                                   | 62.0, CH <sub>3</sub>      |
| 2-OMe                | 3.93, s                                    | 56.1, CH <sub>3</sub>                                      | 3.92, s                                     | 56.0, CH <sub>3</sub>                                      |                                           |                            |
| 3-OMe                | 3.98, s                                    | 56.1, CH <sub>3</sub>                                      |                                             |                                                            |                                           |                            |
| -OCH <sub>2</sub> O- | 6.03, d (1.3); 6.02, d (1.3)               | 101.1, CH <sub>2</sub>                                     | 6.04, s                                     | 101.2, CH <sub>2</sub>                                     | 6.14, s                                   | 102.3, CH <sub>2</sub>     |
| -NMe                 | 2.67, s                                    | 42.5, CH <sub>3</sub>                                      | 2.64, s                                     | 43.0, CH <sub>3</sub>                                      |                                           |                            |

<sup>a</sup> In CDCl<sub>3</sub>; <sup>b</sup> In pyridine-*d*<sub>6</sub>.

**Table S2.10.**  $^1\text{H}$  NMR (400 MHz) and  $^{13}\text{C}$  NMR (100 MHz) spectroscopic data of **37–40** in  $\text{CDCl}_3$  ( $J$  in Hz,  $\delta$  in ppm)

| position     | <b>37</b>                                 |                            | <b>38</b>                                 |                            | <b>39</b>                                 |                            | <b>40</b>                                 |                            |
|--------------|-------------------------------------------|----------------------------|-------------------------------------------|----------------------------|-------------------------------------------|----------------------------|-------------------------------------------|----------------------------|
|              | $\delta_{\text{H}}$ , multi. ( $J$ in Hz) | $\delta_{\text{C}}$ , type | $\delta_{\text{H}}$ , multi. ( $J$ in Hz) | $\delta_{\text{C}}$ , type | $\delta_{\text{H}}$ , multi. ( $J$ in Hz) | $\delta_{\text{C}}$ , type | $\delta_{\text{H}}$ , multi. ( $J$ in Hz) | $\delta_{\text{C}}$ , type |
| 2            |                                           | 164.0, C                   |                                           | 163.3, C                   |                                           | 164.2, C                   |                                           | 164.2, C                   |
| 3            | 6.03, s                                   | 96.6, CH                   |                                           | 119.8, C                   |                                           | 114.5, C                   |                                           | 114.8, C                   |
| 4            |                                           | 162.8, C                   |                                           | 157.0, C                   |                                           | 157.6, C                   |                                           | 157.6, C                   |
| 5            | 7.33, d (8.5)                             | 131.3, CH                  | 7.83, dd (8.6, 1.2)                       | 114.2, CH                  | 7.96, d (9.2)                             | 118.9, CH                  | 7.96, d (9.3)                             | 118.3, CH                  |
| 6            | 7.57, t (7.8)                             | 121.8, CH                  | 7.34, dd (8.6, 7.6)                       | 123.5, CH                  | 7.17, d (9.2)                             | 114.7, CH                  | 7.20, d (9.3)                             | 112.1, CH                  |
| 7            | 7.22, t (7.6)                             | 123.5, CH                  | 7.04, dd (7.6, 1.2)                       | 107.8, CH                  |                                           | 138.7, C                   |                                           | 141.8, C                   |
| 8            | 7.96, d (7.9)                             | 114.2, CH                  |                                           | 154.7, C                   |                                           | 140.7, C                   |                                           | 141.0, C                   |
| 9            |                                           | 139.8, C                   |                                           | 137.6, C                   |                                           | 149.2, C                   |                                           | 152.4, C                   |
| 10           |                                           | 116.6, C                   |                                           | 104.0, C                   |                                           | 101.8, C                   |                                           | 102.1, C                   |
| $\alpha$     |                                           |                            | 7.62, d (2.8)                             | 144.0, CH                  | 7.57, d (2.8)                             | 142.8, CH                  | 7.54, d (2.9)                             | 143.1, CH                  |
| $\beta$      |                                           |                            | 7.05, d (2.8)                             | 104.6, CH                  | 7.05, d (2.8)                             | 104.9, CH                  | 7.01, d (2.9)                             | 104.8, CH                  |
| 4-OMe        | 3.94, s                                   | 55.9, $\text{CH}_3$        | 4.42, s                                   | 59.1, $\text{CH}_3$        | 4.42, s                                   | 59.1, $\text{CH}_3$        | 4.40, s                                   | 59.2, $\text{CH}_3$        |
| 7-OMe        |                                           |                            |                                           |                            |                                           |                            | 4.00, s                                   | 56.8, $\text{CH}_3$        |
| 8-OMe        |                                           |                            | 4.07, s                                   | 56.1, $\text{CH}_3$        | 4.20, s                                   | 62.1, $\text{CH}_3$        | 4.09, s                                   | 61.8, $\text{CH}_3$        |
| <i>N</i> -Me | 3.66, s                                   | 29.0, $\text{CH}_3$        |                                           |                            |                                           |                            |                                           |                            |



### S3. Experimental and computational section

#### S3.1. Experimental section      Extraction and isolation

See Scheme S3.1.

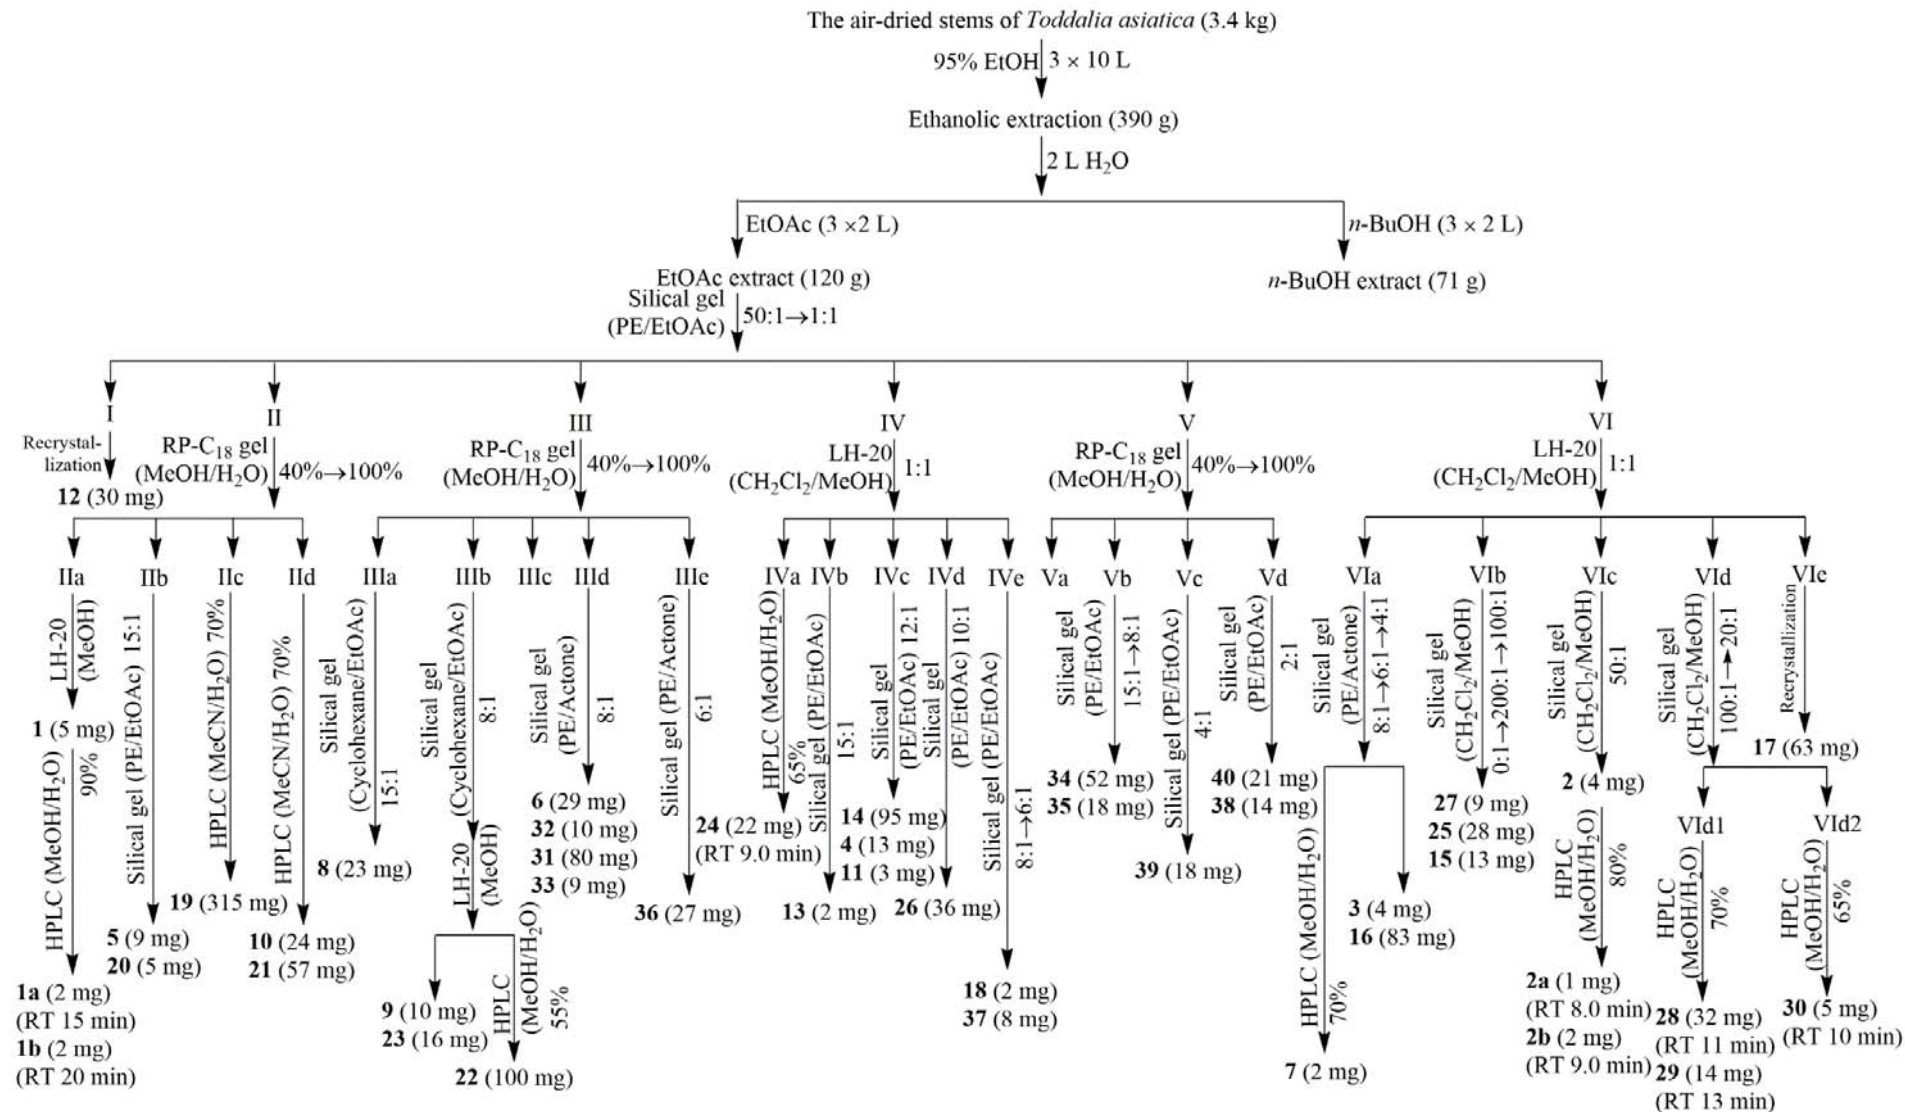

Scheme S3.1. Flow chart for the isolation of chemical constituents from *Toddalia asiatica*

## S3.2. Experimental section PDE4D inhibitory screening assays

### S3.2.1. Expression and purification of PDE4D2 protein

The cDNAs for expression of human PDE4D2 (catalytic domain, residues 86–413) were subcloned into the expression vector pET15b. All these resultant plasmids were transformed into *E. coli* strain BL21 (Codonplus) for over expression. The *E. coli* cells carrying these plasmids were grown in LB medium at 37 °C to  $OD_{600} = 0.7$ , and then 0.1 mM isopropyl  $\beta$ -D-thiogalactopyranoside was added for further growth at 16 °C for 20–40 h. The recombinant protein was purified by Ni-NTA column (Qiagen). The purity of PDE4D2 protein was greater than 95% as shown by SDS-PAGE. A typical batch of purification yielded over 50 mg of PDE4D2 (catalytic domain) from 1 L cell culture.

### S3.2.2. Enzymatic assay.

The enzymatic activities of PDE4D catalytic domain and the inhibition of PDE4D by extracted compounds were assayed by using  $^3\text{H}$ -cAMP as substrates (20000–30000 cpm/assay) and the reactions were occurred in mixture containing 50 mM Tris/HCl (pH 7.5), 10 mM  $\text{MgCl}_2$ , 0.5 mM DTT at room temperature (25 °C) for 15 min. The reactions were terminated by addition of 0.2 M  $\text{ZnSO}_4$  and  $\text{Ba}(\text{OH})_2$ . The reaction product  $^3\text{H}$ -AMP was precipitated out, while unreacted  $^3\text{H}$ -cAMP remained in the supernatant. The mechanism was illustrated as shown below (Scheme S3.2). Radioactivity in the supernatant was measured in 2.5 mL Ultima Gold liquid scintillation cocktails (PerkinElmer) by a PerkinElmer 2910 liquid scintillation counter. Each measurement was repeated at least three times. The  $\text{IC}_{50}$  values were calculated by nonlinear regression. As a reference compound, rolipram purchased from Sigma was measured its  $\text{IC}_{50}$  value before other assays.

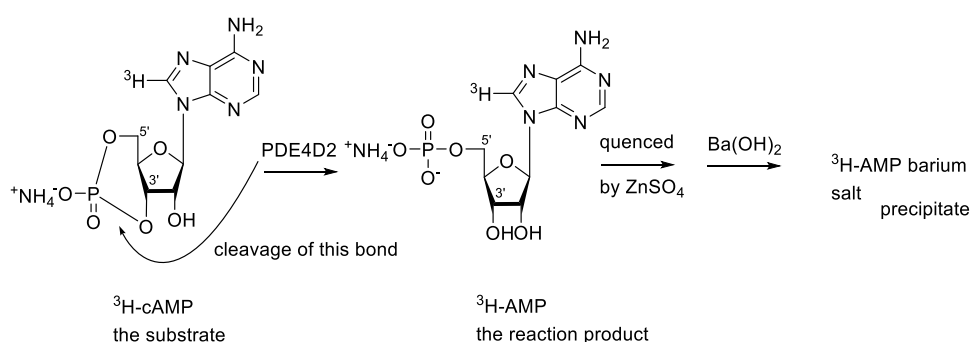

**Scheme S3.2.** The mechanism of enzymatic assay

## S3.3. Computational section ECD and specific optical rotation calculations

### S3.3.1. ECD calculations of compounds 1a/1b and 2a/2b.

The absolute configurations of the two enantiomer pairs **1a/1b** and **2a/2b** were determined by quantum chemical TDDFT calculations of their theoretical ECD spectra. Firstly, geometry of (1'*S*,2'*S*,3'*R*)-**1** was

extracted from the single crystal X-ray data and directly used for further ECD calculation. For (1'S,2'S,3'R)-**2**, conformational analysis was carried out via Monte Carlo searching using molecular mechanism with MMFF94 force field in the Spartan 08 program.<sup>1</sup> In a relative energy window of 0–2 Kcal/mol, the results showed 10 lowest energy conformers (Fig. S4.1). The conformers were then reoptimized using DFT at the B3LYP/6-31+G(d) level in vacuum in the Gaussian 09 program.<sup>2</sup> The B3LYP/6-31+G(d) harmonic vibrational frequencies were further calculated to confirm their stability. In the Gaussian 09 software, the energies, oscillator strengths, and rotational strengths of the first 60 electronic excitations were then calculated using the TDDFT methodology at the B3LYP/6-311++G(2d,2p) level in vacuum. The ECD spectra were simulated by the overlapping Gaussian function ( $\sigma = 0.35$  eV for (1'S,2'S,3'R)-**1**, 0.20 eV for (1'S,2'S,3'R)-**2**),<sup>3</sup> in which velocity rotatory strengths of the first 24 excited states for (1'S,2'S,3'R)-**1** and the first 8 excited states for (1'S,2'S,3'R)-**2** were adopted. Theoretical ECD spectra for the corresponding enantiomers were obtained by directly reverse the calculated ones.

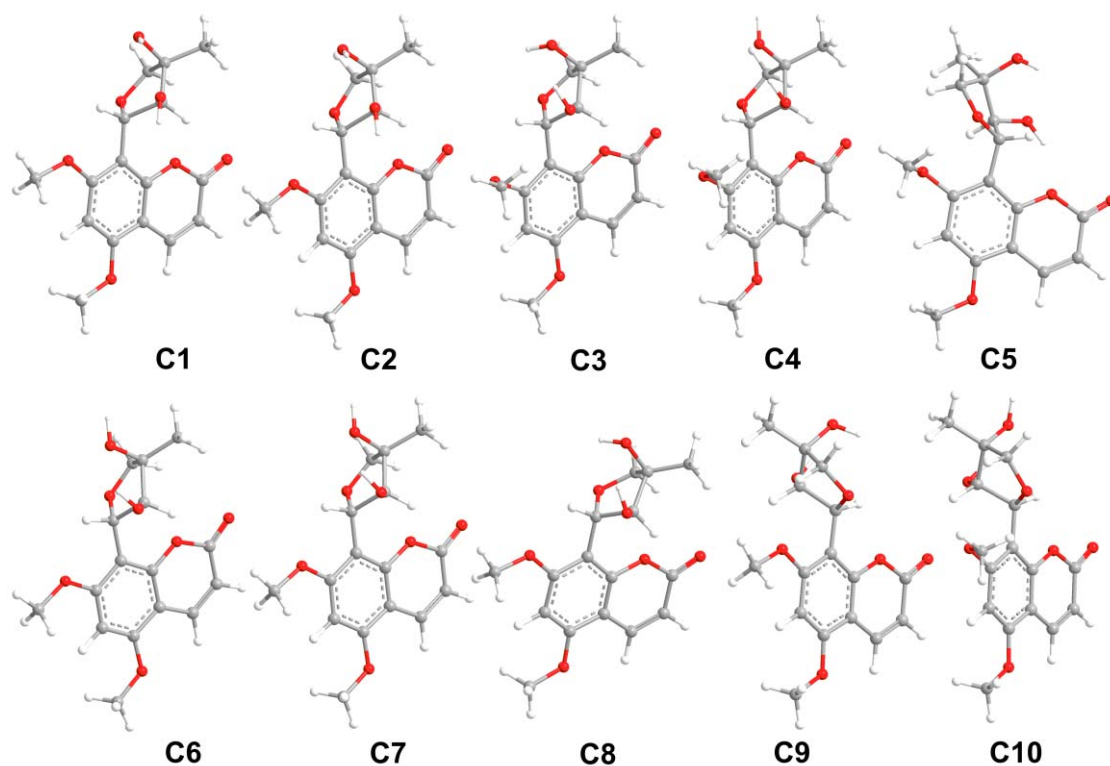

**Fig. S4.1.** B3LYP/6-311+G(d) optimized lowest energy 3D conformers of (1'S,2'S,3'R)-**2**.

#### References:

1. *Spartan 04*; Wavefunction Inc.:Irvine, CA.
2. *Gaussian 09*, Revision A.1, Frisch, M. J.; Trucks, G. W.; Schlegel, H. B.; Scuseria, G. E.; Robb, M. A.; Cheeseman, J. R.; Scalmani, G.; Barone, V.; Mennucci, B.; Petersson, G. A.; Nakatsuji, H.; Caricato, M.; Li, X.; Hratchian, H. P.; Izmaylov, A. F.; Bloino, J.; Zheng, G.; Sonnenberg, J. L.; Hada, M.; Ehara, M.; Toyota, K.; Fukuda, R.; Hasegawa, J.; Ishida, M.; Nakajima, T.; Honda, Y.; Kitao, O.; Nakai, H.; Vreven, T.; Montgomery, Jr., J. A.; Peralta, J. E.; Ogliaro, F.; Bearpark, M.; Heyd, J. J.; Brothers, E.; Kudin, K. N.; Staroverov, V. N.; Kobayashi, R.; Normand, J.; Raghavachari, K.; Rendell, A.; Burant, J. C.; Iyengar, S. S.; Tomasi, J.; Cossi, M.; Rega, N.; Millam, J. M.; Klene, M.; Knox, J. E.;

Cross, J. B.; Bakken, V.; Adamo, C.; Jaramillo, J.; Gomperts, R.; Stratmann, R. E.; Yazyev, O.; Austin, A. J.; Cammi, R.; Pomelli, C.; Ochterski, J. W.; Martin, R. L.; Morokuma, K.; Zakrzewski, V. G.; Voth, G. A.; Salvador, P.; Dannenberg, J. J.; Dapprich, S.; Daniels, A. D.; Farkas, Ö.; Foresman, J. B.; Ortiz, J. V.; Cioslowski, J.; Fox, D. J. Gaussian, Inc., Wallingford CT, 2009.

3. Stephens, P. J.; Harada, N. ECD cotton effect approximated by the Gaussian curve and other methods. *Chirality* **2010**, *22*, 229–233.

### S3.3.1.1. ECD simulation:

ECD spectrum of each conformation is simulated according to the overlapping Gaussian functions expressed as:

$$\Delta\varepsilon(E) = \frac{1}{2.296 \times 10^{-39} \sqrt{\pi} \sigma} \sum_i^A \Delta E_i R_i e^{[-(E - \Delta E_i)^2 / \sigma^2]}$$

Where  $\sigma$  is half the bandwidth at 1/e peak height and expressed in energy units. The parameters  $\Delta E_i$  and  $R_i$  are the excitation energies and rotational strengths for the transition  $i$ , respectively.

The above function is converted to  $\Delta\varepsilon$ ,  $\lambda$  (wavelength) correlations as:

$$\Delta\varepsilon(\lambda) = \frac{1}{2.296 \times 10^{-39} \sqrt{\pi} \sigma} \sum_i^A \Delta E_i R_i e^{[-(1240/\lambda - \Delta E_i)^2 / \sigma^2]}$$

and then simulation was accomplished by using the Excel 2003 and the Origin 7.0 software.

To get the final spectra, all the simulated spectra of conformations of each compound were averaged according to their energy and the Boltzmann distribution theory expressed as:

$$\frac{N_i^*}{N} = \frac{g_i e^{-\varepsilon_i / k_B T}}{\sum g_i e^{-\varepsilon_i / k_B T}}$$

### S3.3.1.2. Energy analysis for (1'S,2'S,3'R)-2:

| conf.     | Gibbs free energy (298.15 K) |                       |                        | conf.      | Gibbs free energy (298.15 K) |                       |                        |
|-----------|------------------------------|-----------------------|------------------------|------------|------------------------------|-----------------------|------------------------|
|           | G (Hartree)                  | $\Delta G$ (Kcal/mol) | Boltzmann Distribution |            | G (Hartree)                  | $\Delta G$ (Kcal/mol) | Boltzmann Distribution |
| <b>C1</b> | -1146.832558                 | 0.606802              | 0.104                  | <b>C6</b>  | -1146.833198                 | 0.205196              | 0.205                  |
| <b>C2</b> | -1146.832557                 | 0.60743               | 0.104                  | <b>C7</b>  | -1146.833194                 | 0.207706              | 0.204                  |
| <b>C3</b> | -1146.831399                 | 1.334086              | 0.030                  | <b>C8</b>  | -1146.833525                 | 0                     | 0.289                  |
| <b>C4</b> | -1146.83088                  | 1.659764              | 0.018                  | <b>C9</b>  | -1146.831593                 | 1.212349              | 0.037                  |
| <b>C5</b> | -1146.82963                  | 2.444151              | 0.005                  | <b>C10</b> | -1146.829691                 | 2.405873              | 0.005                  |

### S3.3.1.3. Calculated ECD data for (1'S,2'S,3'R)-1 X-ray structure:

| No | Excitation energies(eV) | Rotatory Strengths* | No | Excitation energies(eV) | Rotatory Strengths* | No | Excitation energies(eV) | Rotatory Strengths* |
|----|-------------------------|---------------------|----|-------------------------|---------------------|----|-------------------------|---------------------|
| 1  | 3.7067                  | 2.5637              | 21 | 6.0479                  | 11.6477             | 41 | 6.6213                  | 1.3237              |
| 2  | 4.1742                  | 19.9063             | 22 | 6.0541                  | -13.9444            | 42 | 6.676                   | 3.7782              |

|    |        |          |    |        |          |    |        |          |
|----|--------|----------|----|--------|----------|----|--------|----------|
| 3  | 4.3714 | -3.5691  | 23 | 6.0769 | 4.7948   | 43 | 6.7172 | 2.3166   |
| 4  | 4.5105 | -2.0817  | 24 | 6.0924 | 0.2614   | 44 | 6.7247 | 0.4681   |
| 5  | 4.5318 | -1.9576  | 25 | 6.1234 | -33.8698 | 45 | 6.7478 | -2.479   |
| 6  | 4.8536 | 3.3484   | 26 | 6.1515 | -2.7032  | 46 | 6.7702 | 6.194    |
| 7  | 5.0315 | 0.4589   | 27 | 6.258  | 2.4915   | 47 | 6.7768 | -3.1458  |
| 8  | 5.2128 | 6.0406   | 28 | 6.2992 | -3.4222  | 48 | 6.7937 | 0.2315   |
| 9  | 5.292  | 0.0208   | 29 | 6.315  | 6.4559   | 49 | 6.8227 | -21.5017 |
| 10 | 5.4211 | -5.6085  | 30 | 6.3722 | 4.5226   | 50 | 6.8445 | -16.6135 |
| 11 | 5.4772 | 14.6515  | 31 | 6.3961 | -3.1884  | 51 | 6.8522 | 34.1974  |
| 12 | 5.4985 | -0.3638  | 32 | 6.4048 | 0.4349   | 52 | 6.872  | 0.0005   |
| 13 | 5.5535 | -10.2574 | 33 | 6.4395 | -2.3141  | 53 | 6.9003 | -0.3028  |
| 14 | 5.6163 | -0.3068  | 34 | 6.4554 | -0.2532  | 54 | 6.9282 | 0.0833   |
| 15 | 5.6725 | 2.8844   | 35 | 6.4686 | -2.9328  | 55 | 6.938  | -1.698   |
| 16 | 5.775  | -6.0008  | 36 | 6.4988 | -0.9568  | 56 | 6.949  | -2.4052  |
| 17 | 5.8806 | -1.0049  | 37 | 6.5377 | 8.5687   | 57 | 6.9553 | -2.0742  |
| 18 | 5.9075 | 1.1876   | 38 | 6.5524 | 1.0871   | 58 | 6.983  | 1.7599   |
| 19 | 5.9344 | -1.276   | 39 | 6.5943 | 0.2364   | 59 | 7.0021 | -2.7786  |
| 20 | 6.0086 | 40.5267  | 40 | 6.6055 | -1.8271  | 60 | 7.0261 | -4.8095  |

\* R(velocity) 10\*\*-40 erg-esu-cm

### S3.3.1.4. Calculated ECD data for (1'S,2'S,3'R)-2 structure:

| State | C1                      |                     | C2                      |                     | C3                      |                     |
|-------|-------------------------|---------------------|-------------------------|---------------------|-------------------------|---------------------|
|       | Excitation energies(eV) | Rotatory Strengths* | Excitation energies(eV) | Rotatory Strengths* | Excitation energies(eV) | Rotatory Strengths* |
| 1     | 3.7078                  | 4.394               | 3.7079                  | 4.3681              | 3.7336                  | -3.7381             |
| 2     | 4.0721                  | 0.816               | 4.0722                  | 0.8137              | 4.1248                  | -38.6348            |
| 3     | 4.241                   | -0.0746             | 4.2411                  | -0.0776             | 4.323                   | 2.1085              |
| 4     | 4.5491                  | -1.4434             | 4.5491                  | -1.4394             | 4.5517                  | 3.6832              |
| 5     | 4.796                   | -16.6292            | 4.7962                  | -16.581             | 4.8607                  | 0.3209              |
| 6     | 4.8675                  | 7.4354              | 4.8676                  | 7.4209              | 5.0422                  | -8.2073             |
| 7     | 4.9303                  | -0.5061             | 4.9302                  | -0.5134             | 5.1819                  | 5.6209              |
| 8     | 5.1051                  | -3.918              | 5.1051                  | -3.8952             | 5.3076                  | -1.611              |
| 9     | 5.1704                  | 2.7825              | 5.1709                  | 2.7677              | 5.4394                  | -9.8737             |
| 10    | 5.2019                  | -1.0395             | 5.2022                  | -1.0984             | 5.5855                  | -1.5293             |
| 11    | 5.307                   | -4.8133             | 5.3071                  | -4.7905             | 5.6003                  | -0.2631             |
| 12    | 5.3891                  | 19.3662             | 5.3891                  | 19.4315             | 5.6658                  | -25.6994            |
| 13    | 5.4801                  | -5.52               | 5.4803                  | -5.6054             | 5.6756                  | 6.0741              |
| 14    | 5.5445                  | -15.4188            | 5.5445                  | -15.4213            | 5.6916                  | -3.0596             |
| 15    | 5.6081                  | 14.7973             | 5.6083                  | 14.759              | 5.7284                  | -6.5104             |
| 16    | 5.6682                  | -11.4741            | 5.6685                  | -11.4095            | 5.7787                  | 19.6138             |
| 17    | 5.6975                  | 7.5719              | 5.6976                  | 7.4651              | 5.9435                  | -0.5224             |
| 18    | 5.737                   | -16.8969            | 5.7373                  | -16.8024            | 5.9699                  | 2.3561              |
| 19    | 5.8455                  | 1.7923              | 5.8442                  | 1.7824              | 6.0155                  | 4.7493              |
| 20    | 5.8601                  | -4.9011             | 5.8602                  | -4.9689             | 6.0359                  | 1.3252              |
| 21    | 5.9191                  | -36.4767            | 5.9193                  | -36.195             | 6.0491                  | -15.8535            |
| 22    | 5.9285                  | 6.0534              | 5.9285                  | 5.811               | 6.0776                  | 8.9783              |

|    |        |          |        |          |        |          |
|----|--------|----------|--------|----------|--------|----------|
| 23 | 5.9515 | 14.4251  | 5.9517 | 14.4367  | 6.089  | 4.0268   |
| 24 | 5.9726 | -7.3544  | 5.973  | -7.2674  | 6.2083 | 3.402    |
| 25 | 6.0361 | -0.6015  | 6.0361 | -0.5959  | 6.2374 | -9.1388  |
| 26 | 6.0577 | 12.6017  | 6.0575 | 12.3405  | 6.2497 | 2.1771   |
| 27 | 6.0744 | 10.1564  | 6.0743 | 10.3517  | 6.2799 | 14.5538  |
| 28 | 6.1263 | -20.0248 | 6.1264 | -19.9978 | 6.2948 | -2.5113  |
| 29 | 6.1758 | 3.6438   | 6.1761 | 3.6844   | 6.3127 | 11.5758  |
| 30 | 6.2171 | 12.3233  | 6.2176 | 12.4982  | 6.3357 | -2.5014  |
| 31 | 6.2241 | -3.0485  | 6.2244 | -3.1998  | 6.4514 | -12.5162 |
| 32 | 6.2347 | 0.3466   | 6.2347 | 0.3406   | 6.4635 | 7.2236   |
| 33 | 6.26   | 20.7578  | 6.2601 | 20.4356  | 6.4819 | 1.0341   |
| 34 | 6.2722 | -5.2625  | 6.2723 | -5.1587  | 6.4891 | -13.8615 |
| 35 | 6.3632 | 3.0738   | 6.3633 | 3.1158   | 6.5037 | 6.7488   |
| 36 | 6.4035 | 7.7916   | 6.4036 | 7.7186   | 6.536  | 0.8232   |
| 37 | 6.4367 | -1.2104  | 6.4369 | -1.1968  | 6.5591 | 5.5103   |
| 38 | 6.4507 | 15.1876  | 6.4509 | 15.0887  | 6.5712 | -6.1086  |
| 39 | 6.4732 | 0.5946   | 6.4735 | 0.6901   | 6.5891 | 6.9782   |
| 40 | 6.4835 | 3.9205   | 6.4837 | 3.913    | 6.6087 | -2.2937  |
| 41 | 6.4967 | -2.0078  | 6.497  | -2.0534  | 6.6441 | 18.0535  |
| 42 | 6.5134 | -3.2344  | 6.5135 | -3.2422  | 6.6659 | 0.2479   |
| 43 | 6.5728 | 5.8997   | 6.5732 | 5.9291   | 6.68   | 23.3526  |
| 44 | 6.5981 | -0.2783  | 6.5981 | -0.2924  | 6.7183 | 4.5225   |
| 45 | 6.6228 | 6.4836   | 6.6229 | 6.3049   | 6.7365 | -6.9888  |
| 46 | 6.6465 | 26.5772  | 6.6466 | 26.6468  | 6.7644 | 10.2845  |
| 47 | 6.6742 | 2.5702   | 6.6744 | 3.643    | 6.782  | -4.1049  |
| 48 | 6.6794 | -33.9351 | 6.6795 | -36.8024 | 6.7892 | -2.9083  |
| 49 | 6.6809 | 15.6216  | 6.681  | 18.4612  | 6.8167 | 4.6995   |
| 50 | 6.6944 | 11.5258  | 6.6944 | 11.0755  | 6.8526 | 11.9254  |
| 51 | 6.7042 | -5.1946  | 6.7042 | -5.4948  | 6.865  | 3.7756   |
| 52 | 6.7306 | -7.5448  | 6.7306 | -7.5173  | 6.8684 | -3.5595  |
| 53 | 6.7563 | -8.0985  | 6.7565 | -8.268   | 6.9307 | -3.5026  |
| 54 | 6.7739 | -13.5214 | 6.7741 | -13.3926 | 6.9468 | -9.0557  |
| 55 | 6.7961 | -9.2939  | 6.7962 | -9.3263  | 6.9698 | -5.7051  |
| 56 | 6.8041 | 1.7911   | 6.8042 | 1.914    | 6.9885 | 3.5014   |
| 57 | 6.8054 | -5.2389  | 6.8054 | -5.3037  | 6.9915 | -1.0122  |
| 58 | 6.8267 | -1.2532  | 6.8267 | -1.2662  | 7.0302 | 3.7536   |
| 59 | 6.8391 | 6.3465   | 6.8393 | 6.3029   | 7.045  | 3.5283   |
| 60 | 6.8875 | 1.6126   | 6.888  | 1.5841   | 7.0703 | -1.3416  |

\* R(velocity) 10\*\*-40 erg-esu-cm

| State | C4                      |                     | C5                      |                     | C6                      |                     |
|-------|-------------------------|---------------------|-------------------------|---------------------|-------------------------|---------------------|
|       | Excitation energies(eV) | Rotatory Strengths* | Excitation energies(eV) | Rotatory Strengths* | Excitation energies(eV) | Rotatory Strengths* |
| 1     | 3.7085                  | -3.514              | 3.651                   | 2.4267              | 3.6742                  | 1.33                |
| 2     | 4.119                   | -32.9258            | 4.0673                  | -37.446             | 4.0915                  | -1.8159             |
| 3     | 4.2306                  | -1.7278             | 4.267                   | 7.6891              | 4.3142                  | -0.9275             |

|    |        |          |        |          |        |          |
|----|--------|----------|--------|----------|--------|----------|
| 4  | 4.5404 | 3.2231   | 4.5629 | 11.233   | 4.5762 | -0.7898  |
| 5  | 4.8802 | -7.0961  | 4.7512 | 2.4781   | 4.7904 | -10.5902 |
| 6  | 5.0315 | 5.6521   | 4.9747 | 12.2661  | 4.8576 | -0.0359  |
| 7  | 5.1473 | 0.785    | 5.0807 | -6.2038  | 4.9376 | 5.8627   |
| 8  | 5.2672 | -7.6002  | 5.1273 | -0.1227  | 5.2256 | -10.701  |
| 9  | 5.3474 | 3.8388   | 5.274  | 3.5851   | 5.3108 | 15.8048  |
| 10 | 5.4711 | 3.2639   | 5.3716 | 3.2415   | 5.3437 | -3.6773  |
| 11 | 5.5486 | -4.1242  | 5.5452 | -4.5514  | 5.3564 | 1.934    |
| 12 | 5.555  | 0.0619   | 5.5538 | 17.8064  | 5.4646 | 1.1741   |
| 13 | 5.5607 | -4.2763  | 5.604  | -8.6202  | 5.5394 | 2.2238   |
| 14 | 5.6636 | -20.4122 | 5.6333 | 29.0246  | 5.5544 | 9.2564   |
| 15 | 5.6764 | 2.8055   | 5.7023 | -36.4165 | 5.5708 | -15.2823 |
| 16 | 5.7363 | 29.9101  | 5.7938 | -2.5371  | 5.6919 | 17.747   |
| 17 | 5.7684 | -3.8714  | 5.8408 | 14.2133  | 5.7432 | -0.9154  |
| 18 | 5.8616 | -33.9866 | 5.9329 | -8.2211  | 5.7932 | -5.5338  |
| 19 | 5.8999 | 0.1087   | 5.9697 | -3.7557  | 5.8214 | -6.0716  |
| 20 | 5.9327 | -9.4468  | 6.0464 | 1.911    | 5.8322 | 3.6219   |
| 21 | 5.9615 | 15.9279  | 6.0741 | -0.0558  | 5.8888 | -10.749  |
| 22 | 6.0688 | 15.8947  | 6.1006 | 25.8871  | 5.8995 | -38.6668 |
| 23 | 6.0743 | 17.2106  | 6.129  | 12.976   | 5.9385 | 5.5336   |
| 24 | 6.0889 | -19.7726 | 6.1573 | -3.581   | 5.9564 | -18.562  |
| 25 | 6.1586 | 2.4086   | 6.1926 | 1.3399   | 6.0639 | -11.3635 |
| 26 | 6.1988 | -0.0495  | 6.236  | -5.2848  | 6.0871 | 35.0178  |
| 27 | 6.2278 | -5.0773  | 6.2636 | -1.2257  | 6.127  | 7.4273   |
| 28 | 6.2446 | -0.1346  | 6.3241 | -1.7726  | 6.1405 | -3.327   |
| 29 | 6.3036 | -27.817  | 6.3466 | -4.178   | 6.166  | -9.3266  |
| 30 | 6.3152 | 0.2213   | 6.3963 | 6.5885   | 6.2213 | -6.7139  |
| 31 | 6.3512 | 3.6166   | 6.4057 | -18.3005 | 6.2605 | -4.3412  |
| 32 | 6.4135 | -1.8313  | 6.4246 | 4.7365   | 6.269  | 15.2972  |
| 33 | 6.4235 | -7.7322  | 6.4639 | 1.2077   | 6.2948 | -11.1205 |
| 34 | 6.4478 | 13.9014  | 6.4899 | -5.4674  | 6.3017 | 0.253    |
| 35 | 6.4557 | 5.1389   | 6.5068 | -5.8346  | 6.3261 | 4.1266   |
| 36 | 6.4798 | 0.8625   | 6.5259 | -11.1897 | 6.3872 | 2.8931   |
| 37 | 6.5029 | -1.2888  | 6.55   | -7.0257  | 6.3913 | 10.6113  |
| 38 | 6.5189 | 2.3526   | 6.57   | -7.6863  | 6.4185 | -2.6096  |
| 39 | 6.5377 | 0.1776   | 6.6006 | -6.9598  | 6.4453 | -1.7223  |
| 40 | 6.5919 | 1.8561   | 6.6335 | -0.8938  | 6.4752 | 1.5474   |
| 41 | 6.5956 | 5.7283   | 6.65   | 1.8051   | 6.5693 | -1.3428  |
| 42 | 6.5996 | -4.1     | 6.6556 | 14.7775  | 6.5988 | 8.2449   |
| 43 | 6.6473 | 0.58     | 6.6866 | -7.3623  | 6.6072 | 6.4936   |
| 44 | 6.6519 | 30.6208  | 6.6956 | 17.0798  | 6.6148 | -2.992   |
| 45 | 6.6708 | 17.3161  | 6.7219 | 18.3212  | 6.6238 | -2.757   |
| 46 | 6.6908 | 12.2862  | 6.7258 | 17.3413  | 6.6405 | 3.6799   |
| 47 | 6.7016 | -20.3669 | 6.7458 | 7.6969   | 6.6669 | 7.7919   |
| 48 | 6.7256 | 2.2887   | 6.7777 | 8.9954   | 6.6837 | 2.7743   |
| 49 | 6.7417 | 20.4269  | 6.7947 | -4.0492  | 6.6889 | -28.2587 |

|    |        |         |        |          |        |         |
|----|--------|---------|--------|----------|--------|---------|
| 50 | 6.7802 | 3.6266  | 6.826  | 1.117    | 6.7066 | 12.957  |
| 51 | 6.7957 | -2.0403 | 6.8567 | -0.5831  | 6.7327 | -0.3001 |
| 52 | 6.8205 | -1.1446 | 6.8758 | 2.2734   | 6.7413 | 10.8422 |
| 53 | 6.8444 | -0.3642 | 6.8937 | -7.7457  | 6.7556 | -9.6125 |
| 54 | 6.877  | -3.6255 | 6.9016 | -13.0431 | 6.7696 | 1.1753  |
| 55 | 6.8808 | 0.1507  | 6.9317 | -3.5005  | 6.7862 | -0.9209 |
| 56 | 6.8872 | 2.2675  | 6.9378 | 6.1446   | 6.7914 | 3.2843  |
| 57 | 6.8949 | 3.0842  | 6.961  | -5.6298  | 6.8131 | 4.176   |
| 58 | 6.9037 | -1.7329 | 6.9742 | -4.776   | 6.8162 | -3.7466 |
| 59 | 6.9403 | -1.0293 | 6.9769 | -4.8891  | 6.8419 | -0.7496 |
| 60 | 6.9443 | -8.9045 | 6.9838 | -0.0441  | 6.8704 | 0.36    |

\* R(velocity)  $10^{**}$ -40 erg-esu-cm

| State | C7                      |                     | C8                      |                     | C9                      |                     |
|-------|-------------------------|---------------------|-------------------------|---------------------|-------------------------|---------------------|
|       | Excitation energies(eV) | Rotatory Strengths* | Excitation energies(eV) | Rotatory Strengths* | Excitation energies(eV) | Rotatory Strengths* |
| 1     | 3.674                   | 1.2733              | 3.6968                  | -0.0046             | 3.7835                  | -5.0144             |
| 2     | 4.0915                  | -1.7938             | 4.1101                  | -2.1346             | 4.1429                  | 7.419               |
| 3     | 4.3139                  | -0.9437             | 4.3779                  | -1.3072             | 4.5053                  | 3.5508              |
| 4     | 4.5763                  | -0.7933             | 4.5854                  | 0.1539              | 4.6152                  | -1.4061             |
| 5     | 4.7902                  | -10.5854            | 4.7756                  | -8.4816             | 4.8531                  | 1.0048              |
| 6     | 4.8577                  | -0.0371             | 4.9022                  | -0.1311             | 4.8722                  | -0.2378             |
| 7     | 4.9376                  | 5.8782              | 4.9551                  | 2.4261              | 5.047                   | -2.3826             |
| 8     | 5.2259                  | -10.7481            | 5.3467                  | -2.3555             | 5.2974                  | -11.7288            |
| 9     | 5.3107                  | 15.8878             | 5.3649                  | -0.4509             | 5.3344                  | 6.3912              |
| 10    | 5.3438                  | -3.6692             | 5.4067                  | -1.7689             | 5.3433                  | 7.7194              |
| 11    | 5.3566                  | 1.9346              | 5.4292                  | 2.324               | 5.3693                  | -5.4594             |
| 12    | 5.4646                  | 1.1993              | 5.5053                  | 9.9094              | 5.5726                  | 5.6256              |
| 13    | 5.5391                  | 2.1428              | 5.5576                  | -11.5183            | 5.745                   | -5.2635             |
| 14    | 5.5543                  | 9.4913              | 5.6641                  | -0.3129             | 5.7573                  | -6.5827             |
| 15    | 5.5706                  | -15.4471            | 5.7452                  | 1.0206              | 5.7763                  | 22.1753             |
| 16    | 5.6922                  | 17.7148             | 5.7516                  | -3.4459             | 5.8078                  | 12.0983             |
| 17    | 5.7432                  | -0.8789             | 5.8561                  | -1.4755             | 5.8251                  | 3.8935              |
| 18    | 5.7932                  | -5.5453             | 5.8643                  | -7.4749             | 5.8438                  | -17.763             |
| 19    | 5.8214                  | -6.0596             | 5.8865                  | 1.1675              | 5.8595                  | -3.0495             |
| 20    | 5.8323                  | 3.6155              | 5.9221                  | 14.4445             | 5.8777                  | -1.3401             |
| 21    | 5.8888                  | -10.9846            | 5.9348                  | -25.5283            | 5.8815                  | -3.0902             |
| 22    | 5.8994                  | -38.4529            | 5.9598                  | -1.4342             | 5.9557                  | -12.3327            |
| 23    | 5.9386                  | 5.5182              | 5.9897                  | -1.9213             | 5.9615                  | -4.8421             |
| 24    | 5.9563                  | -18.4333            | 6.0614                  | 2.8907              | 6.0916                  | -12.9527            |
| 25    | 6.0641                  | -11.2654            | 6.09                    | -3.4974             | 6.1383                  | -8.575              |
| 26    | 6.0869                  | 34.5643             | 6.1415                  | 7.191               | 6.1505                  | 8.3401              |
| 27    | 6.1272                  | 7.4332              | 6.2107                  | -4.935              | 6.1845                  | 7.6998              |
| 28    | 6.1408                  | -3.1144             | 6.2442                  | -1.8069             | 6.2281                  | 3.1352              |
| 29    | 6.1661                  | -9.326              | 6.2631                  | 3.4389              | 6.2414                  | -0.0488             |
| 30    | 6.2214                  | -6.5228             | 6.2755                  | 9.7057              | 6.2528                  | 10.7459             |
| 31    | 6.2601                  | -4.6921             | 6.2803                  | -0.1994             | 6.2965                  | -5.2493             |



|    |        |          |        |          |        |          |
|----|--------|----------|--------|----------|--------|----------|
| 32 | 6.269  | 15.5603  | 6.3034 | 3.452    | 6.3119 | 2.9344   |
| 33 | 6.2949 | -11.1101 | 6.3715 | 0.9883   | 6.3313 | -12.2065 |
| 34 | 6.3016 | 0.2517   | 6.3875 | -0.32    | 6.3678 | 19.1166  |
| 35 | 6.3263 | 4.1125   | 6.4403 | 4.7041   | 6.4172 | -3.3785  |
| 36 | 6.3874 | 3.0171   | 6.4522 | -1.0608  | 6.4498 | -2.2225  |
| 37 | 6.3917 | 10.4052  | 6.4568 | 0.5514   | 6.4618 | -4.6214  |
| 38 | 6.4187 | -2.6794  | 6.4762 | -2.8899  | 6.5033 | -6.5416  |
| 39 | 6.4452 | -1.728   | 6.5341 | 5.4368   | 6.5406 | 3.6696   |
| 40 | 6.4752 | 1.5431   | 6.5892 | 3.3239   | 6.5472 | 1.7679   |
| 41 | 6.5697 | -1.3475  | 6.6095 | -0.7132  | 6.5604 | 2.8413   |
| 42 | 6.5987 | 8.1979   | 6.6228 | 0.3253   | 6.5879 | -2.0421  |
| 43 | 6.6073 | 6.5149   | 6.6561 | 11.5181  | 6.5989 | -9.4611  |
| 44 | 6.6149 | -3.0353  | 6.6689 | -5.3599  | 6.6474 | 2.2881   |
| 45 | 6.6237 | -2.6655  | 6.6868 | 5.8695   | 6.6648 | 6.1744   |
| 46 | 6.6406 | 3.6234   | 6.7056 | -11.9277 | 6.6847 | 16.3658  |
| 47 | 6.6672 | 7.8865   | 6.7143 | 3.0825   | 6.6996 | 5.6125   |
| 48 | 6.6839 | 2.8098   | 6.7182 | -2.3973  | 6.7412 | -4.1255  |
| 49 | 6.689  | -28.4353 | 6.7228 | -5.0768  | 6.749  | -1.4578  |
| 50 | 6.7067 | 13.1062  | 6.742  | 8.7366   | 6.7577 | 0.5078   |
| 51 | 6.7328 | -0.2248  | 6.7684 | -7.9434  | 6.7641 | -2.9181  |
| 52 | 6.7412 | 10.6731  | 6.8017 | -6.2782  | 6.779  | -3.7721  |
| 53 | 6.7557 | -9.6453  | 6.8157 | 2.0868   | 6.799  | -26.2174 |
| 54 | 6.7697 | 1.1427   | 6.834  | -2.882   | 6.8057 | 0.7117   |
| 55 | 6.7863 | -0.8998  | 6.8683 | 4.1985   | 6.8167 | 14.4147  |
| 56 | 6.7914 | 3.2116   | 6.8859 | 0.4595   | 6.8279 | -1.1104  |
| 57 | 6.8132 | 4.2172   | 6.913  | 3.498    | 6.8392 | 0.6053   |
| 58 | 6.8161 | -3.7476  | 6.9238 | -2.6751  | 6.9325 | 1.0631   |
| 59 | 6.8416 | -0.7531  | 6.9388 | -1.885   | 6.9522 | -0.8896  |
| 60 | 6.8703 | 0.3371   | 6.9424 | 2.387    | 6.9538 | -4.3608  |

\* R(velocity)  $10^{*-40}$  erg-esu-cm

| State | C10                     |                     | State | C10                     |                     | State | C10                     |                     |
|-------|-------------------------|---------------------|-------|-------------------------|---------------------|-------|-------------------------|---------------------|
|       | Excitation energies(eV) | Rotatory Strengths* |       | Excitation energies(eV) | Rotatory Strengths* |       | Excitation energies(eV) | Rotatory Strengths* |
| 1     | 3.7832                  | -6.6279             | 21    | 5.9954                  | -6.8559             | 41    | 6.5353                  | 1.6353              |
| 2     | 4.1065                  | -32.2884            | 22    | 6.0152                  | 2.937               | 42    | 6.5455                  | -17.8715            |
| 3     | 4.4515                  | 8.439               | 23    | 6.049                   | -0.5421             | 43    | 6.5575                  | -21.3085            |
| 4     | 4.5448                  | -1.5183             | 24    | 6.0699                  | -2.5362             | 44    | 6.5736                  | 17.1805             |
| 5     | 4.8947                  | 11.8693             | 25    | 6.114                   | -8.5292             | 45    | 6.6098                  | 3.8193              |
| 6     | 5.033                   | -5.646              | 26    | 6.1372                  | -15.0706            | 46    | 6.653                   | 10.9954             |
| 7     | 5.1451                  | 8.5075              | 27    | 6.1734                  | 19.5254             | 47    | 6.6643                  | 13.3092             |
| 8     | 5.2599                  | -7.4555             | 28    | 6.2019                  | 1.1148              | 48    | 6.675                   | -5.3773             |
| 9     | 5.3097                  | 2.744               | 29    | 6.2357                  | 34.5311             | 49    | 6.6824                  | -5.9971             |
| 10    | 5.4246                  | 4.1922              | 30    | 6.2567                  | 11.0613             | 50    | 6.7194                  | 5.6066              |
| 11    | 5.4583                  | 27.3623             | 31    | 6.2825                  | -0.2045             | 51    | 6.7328                  | 12.4773             |
| 12    | 5.5353                  | 1.0681              | 32    | 6.3267                  | -6.9227             | 52    | 6.7697                  | -2.2747             |
| 13    | 5.5763                  | -9.1966             | 33    | 6.3492                  | 34.654              | 53    | 6.7882                  | 3.0537              |

|    |        |          |    |        |          |    |        |          |
|----|--------|----------|----|--------|----------|----|--------|----------|
| 14 | 5.6753 | 1.268    | 34 | 6.4326 | 13.8592  | 54 | 6.7951 | 0.4872   |
| 15 | 5.6896 | -0.1374  | 35 | 6.4497 | -4.9857  | 55 | 6.8268 | -22.6842 |
| 16 | 5.7285 | -15.1158 | 36 | 6.4623 | 6.8797   | 56 | 6.8361 | 2.92     |
| 17 | 5.7722 | 8.7631   | 37 | 6.4746 | 0.4383   | 57 | 6.855  | -1.3648  |
| 18 | 5.8483 | -37.4964 | 38 | 6.4849 | 1.4234   | 58 | 6.8947 | -6.7773  |
| 19 | 5.8707 | -6.4321  | 39 | 6.5019 | -2.0376  | 59 | 6.904  | -2.821   |
| 20 | 5.9093 | -5.483   | 40 | 6.5251 | -12.3264 | 60 | 6.9075 | 9.4004   |

\* R(velocity) 10\*\*<sup>-40</sup> erg-esu-cm

### S3.3.2 Specific optical rotation calculation.

Specific optical rotation for (1'S,2'S,3'R)-**1** was calculated on B3LYP/aug-cc-pVDZ level based on the X-ray geometry. Specific optical rotation for (1'S,2'S,3'R)-**2** was calculated on B3LYP/aug-cc-pVDZ//B3LYP/6-31+G(d) level.

| Compound                | Specific optical rotation value | Compound                | Specific optical rotation value |
|-------------------------|---------------------------------|-------------------------|---------------------------------|
| (1'S,2'S,3'R)- <b>1</b> | +95                             | (1'S,2'S,3'R)- <b>2</b> | -117                            |
| <b>1a</b>               | +61                             | <b>2a</b>               | +116                            |
| <b>1b</b>               | -61                             | <b>2b</b>               | -116                            |

#### S3.3.2.1 Specific optical rotation values of conformers of (1'S,2'S,3'R)-**2**

| Conf.      | Boltzmann Distribution | Specific optical rotation | Conformationally averaged |
|------------|------------------------|---------------------------|---------------------------|
| <b>C1</b>  | 0.104                  | -42.15                    | -116.975                  |
| <b>C2</b>  | 0.104                  | -42.46                    |                           |
| <b>C3</b>  | 0.030                  | -255.87                   |                           |
| <b>C4</b>  | 0.018                  | -251.54                   |                           |
| <b>C5</b>  | 0.005                  | -5.18                     |                           |
| <b>C6</b>  | 0.205                  | -131.37                   |                           |
| <b>C7</b>  | 0.204                  | -131.71                   |                           |
| <b>C8</b>  | 0.289                  | -134.88                   |                           |
| <b>C9</b>  | 0.037                  | -67.71                    |                           |
| <b>C10</b> | 0.005                  | -132.05                   |                           |

### S4.1. <sup>1</sup>H NMR spectrum of compound 1

7.9566  
7.9323

7.2597

6.2864  
6.1224  
6.0982

5.6808

5.2766

4.1870  
4.1637  
3.9268  
3.9211  
3.9060

3.5755

1.7481

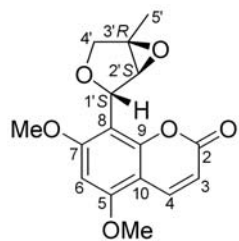

**1a**

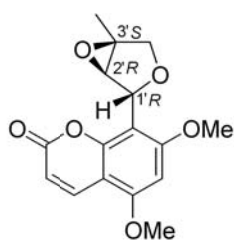

**1b**

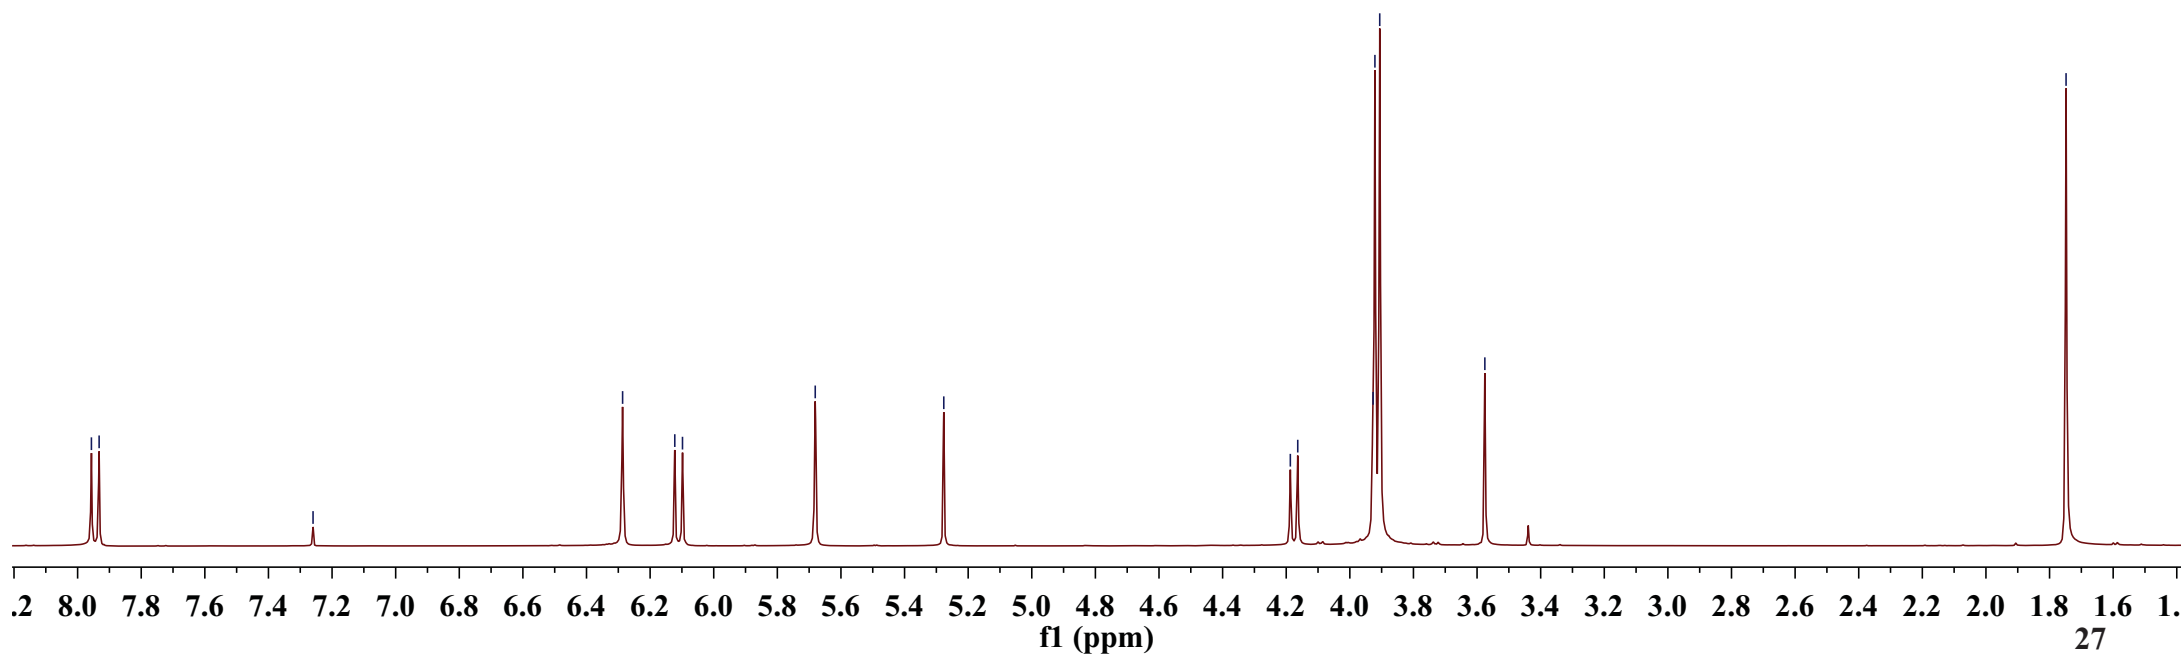

S4.2.  $^{13}\text{C}$ NMR and DEPT spectra of compound 1

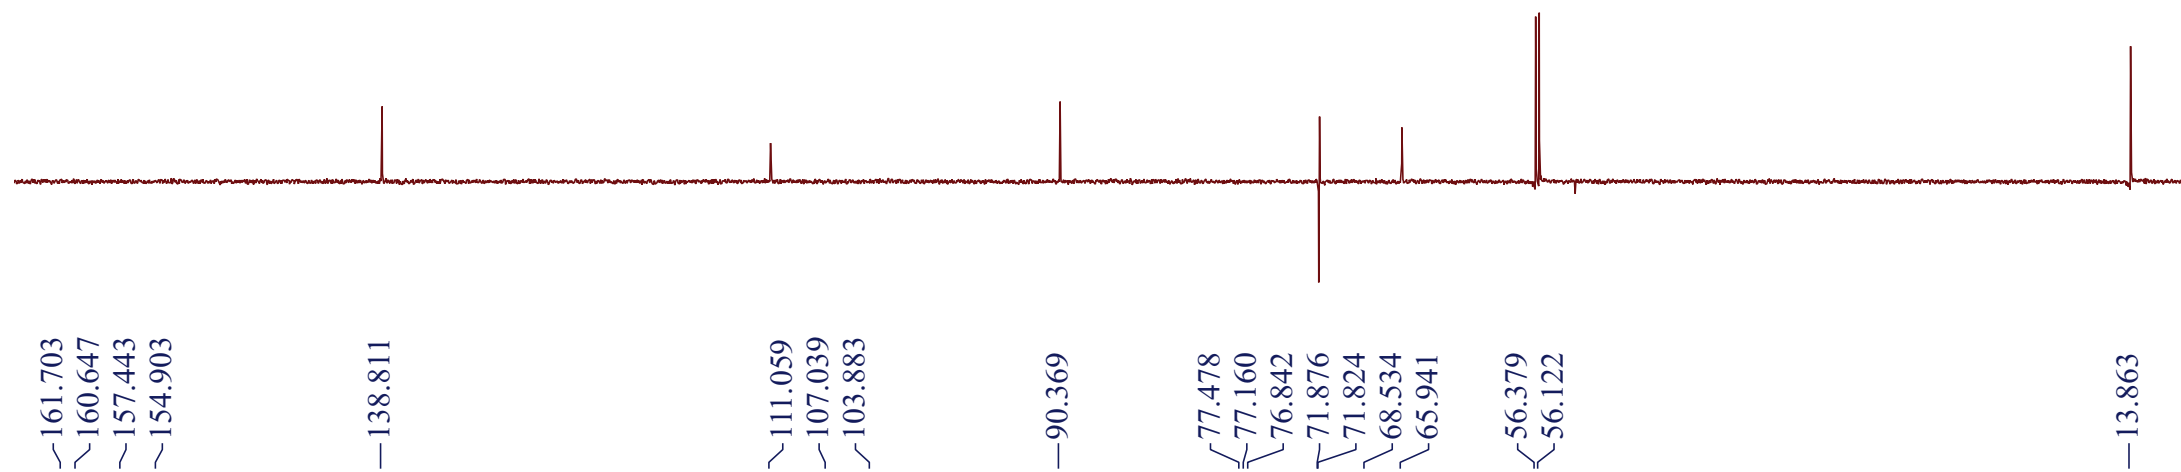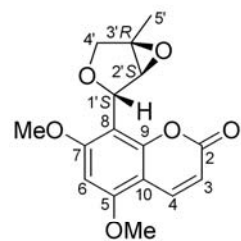

1a

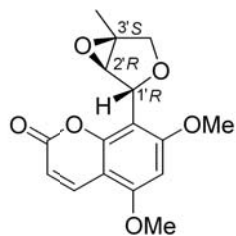

1b

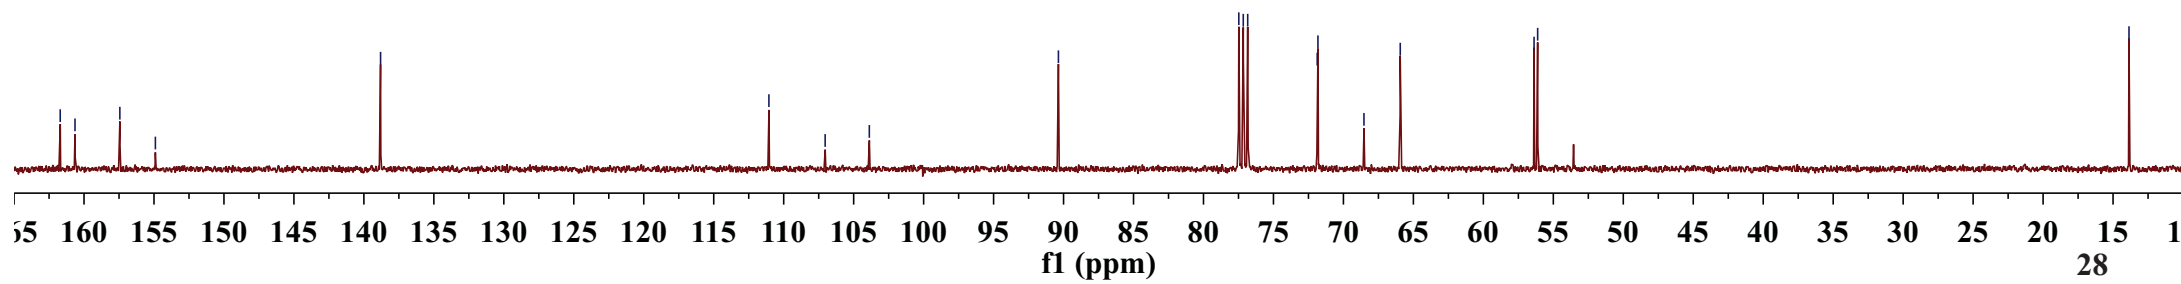

### S4.3. HSQC spectrum of compound 1

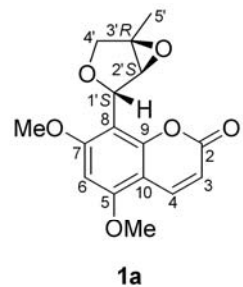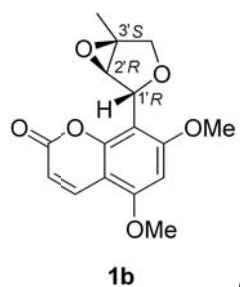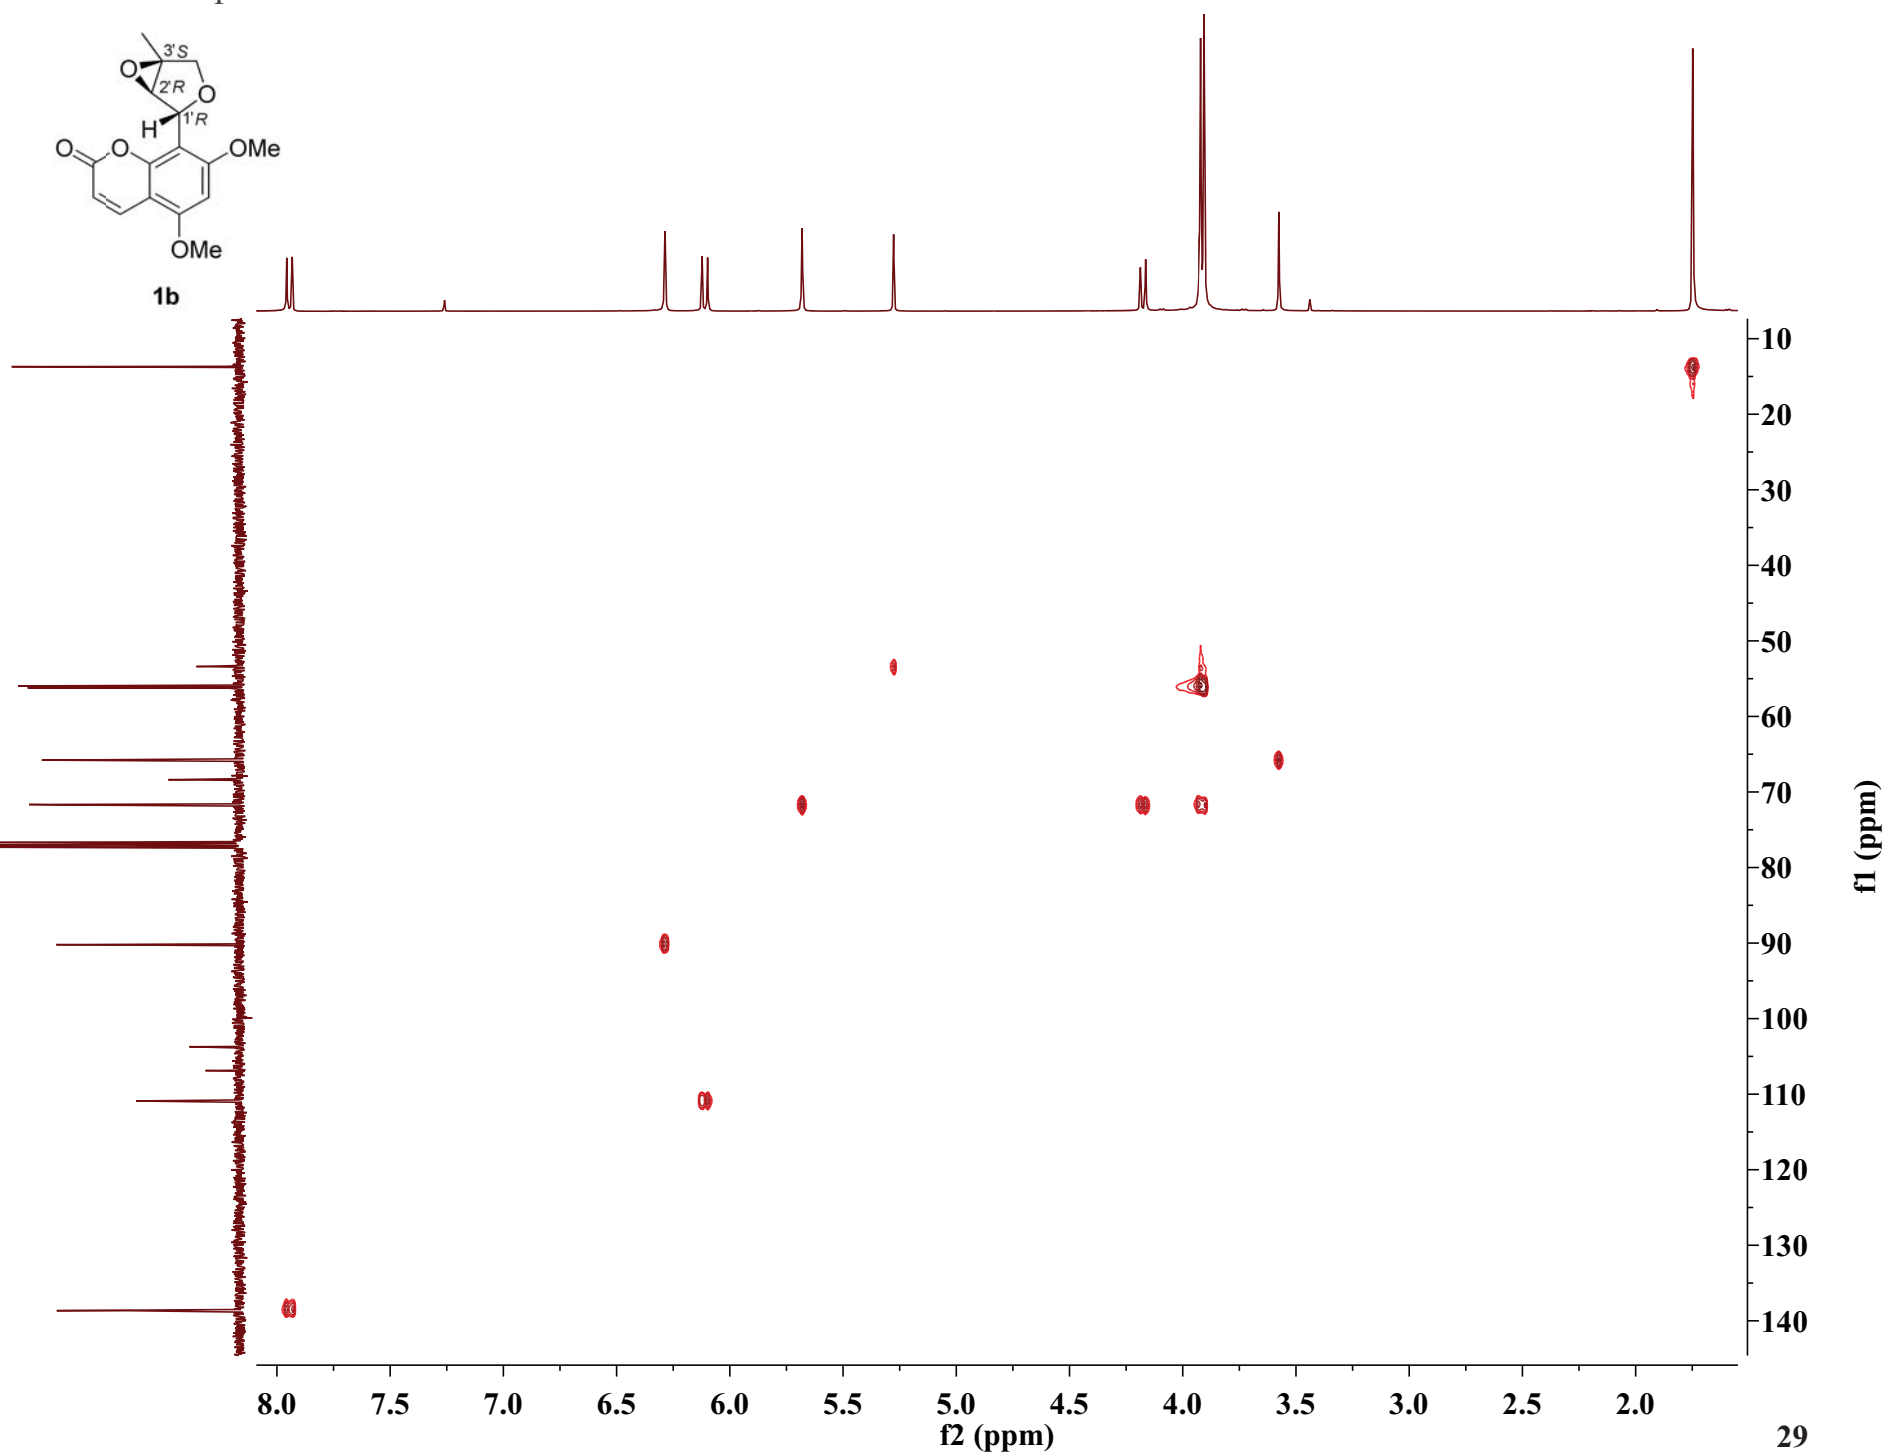

### S4.4. $^1\text{H}$ - $^1\text{H}$ COSY spectrum of compound 1

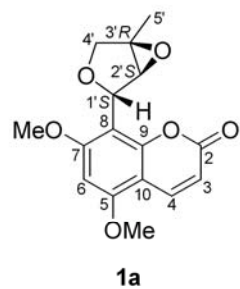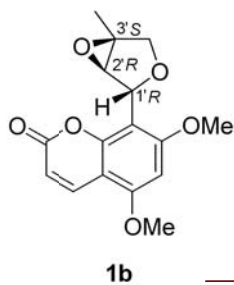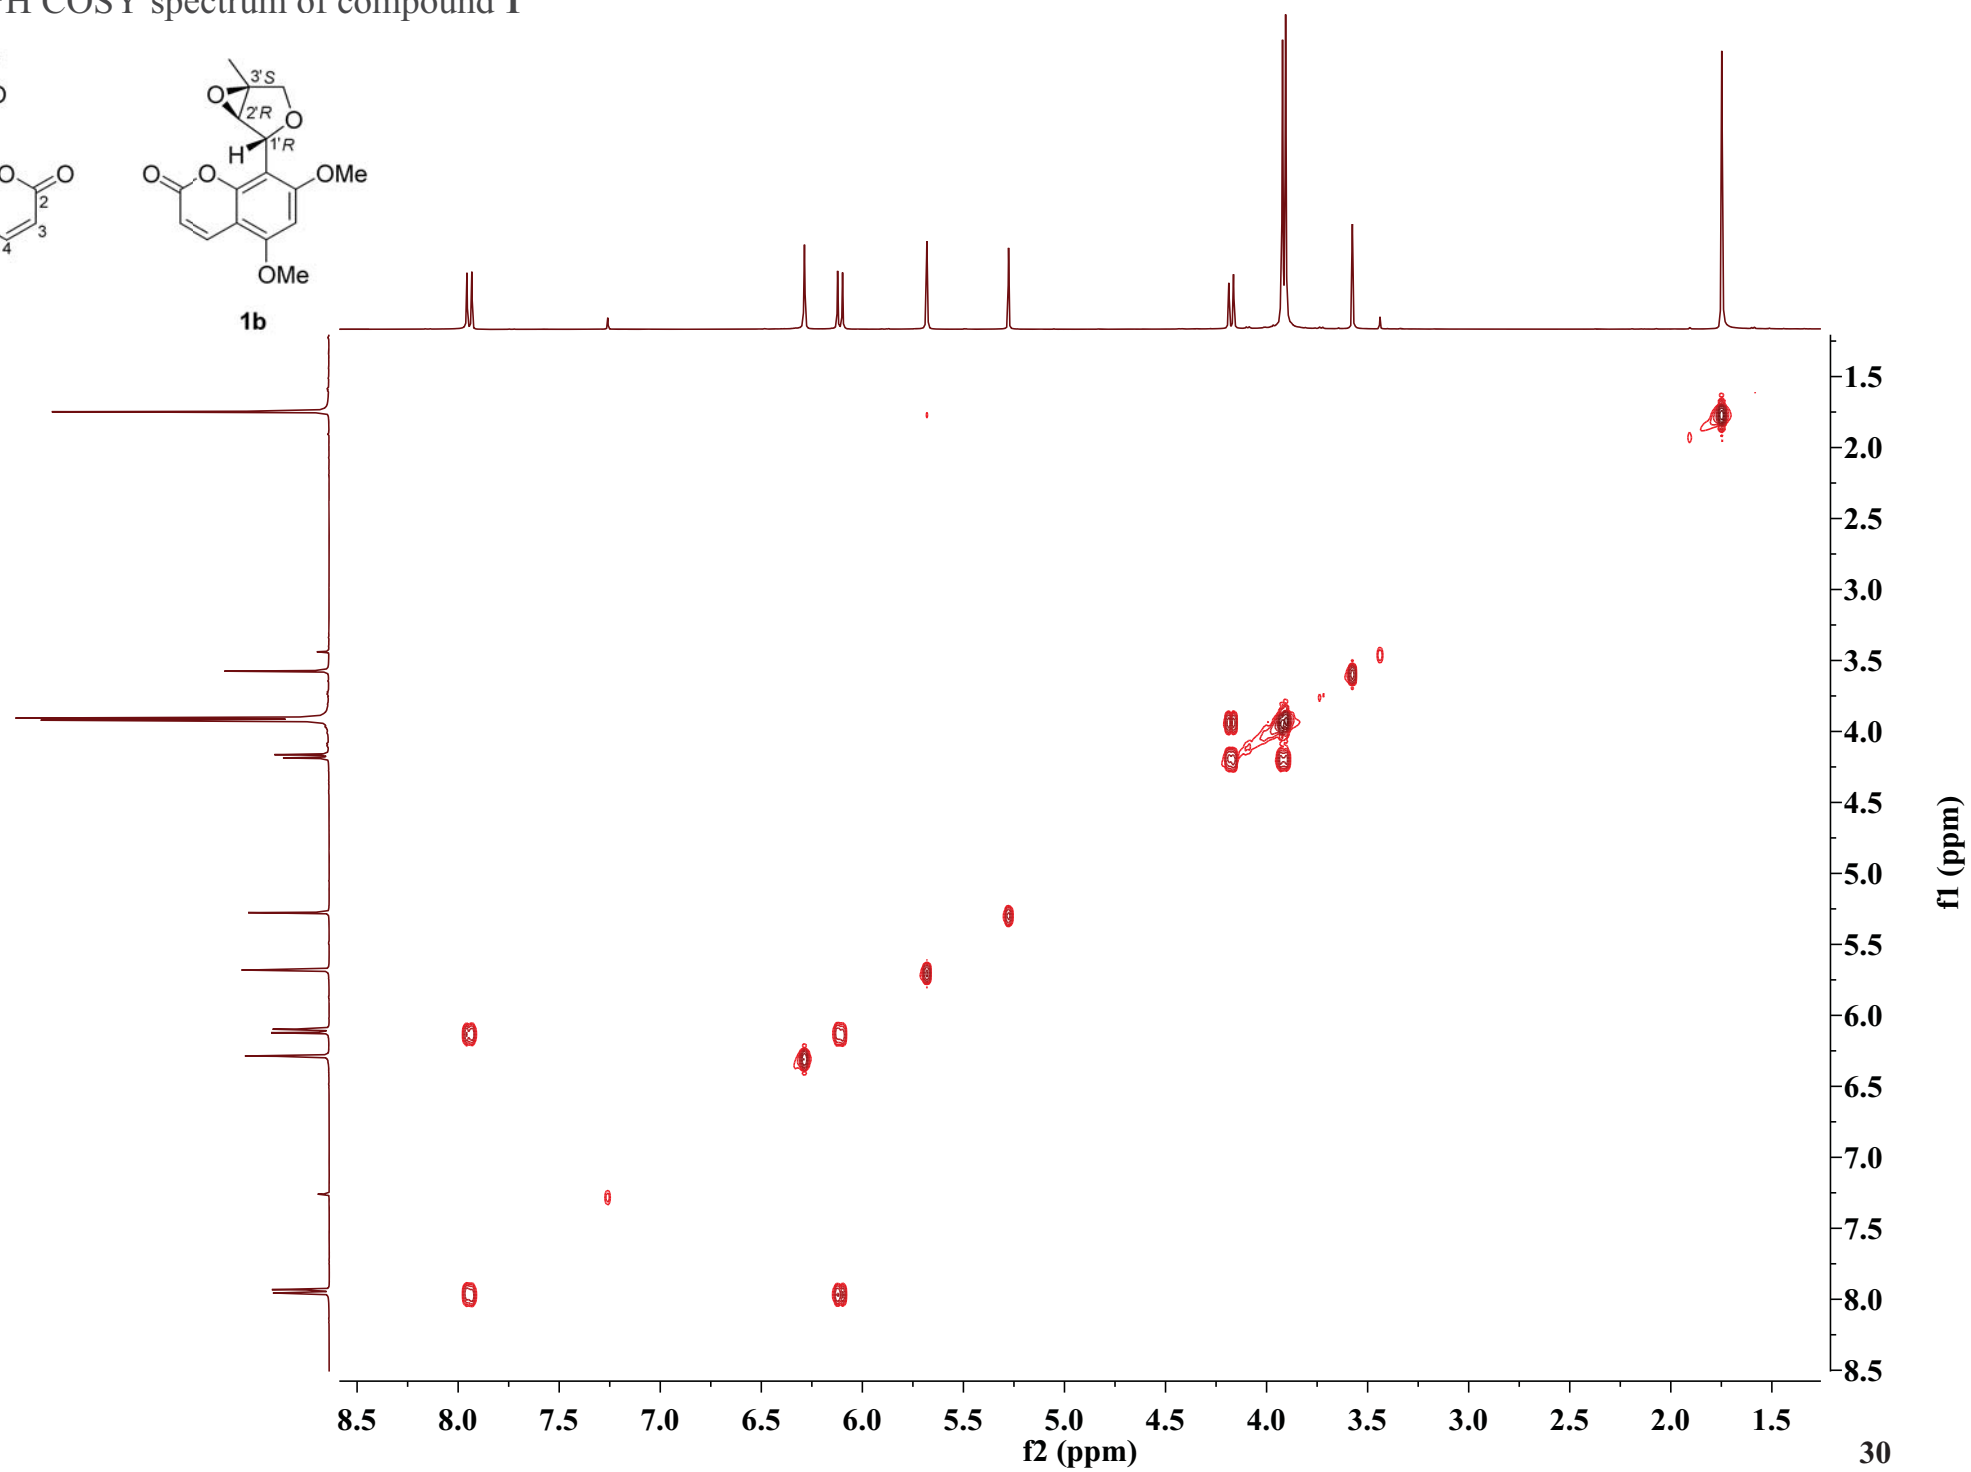

### S4.5. HMBC spectrum of compound 1

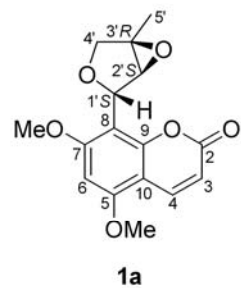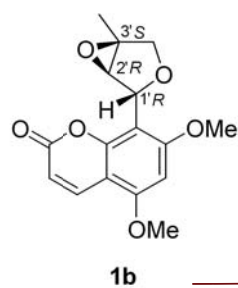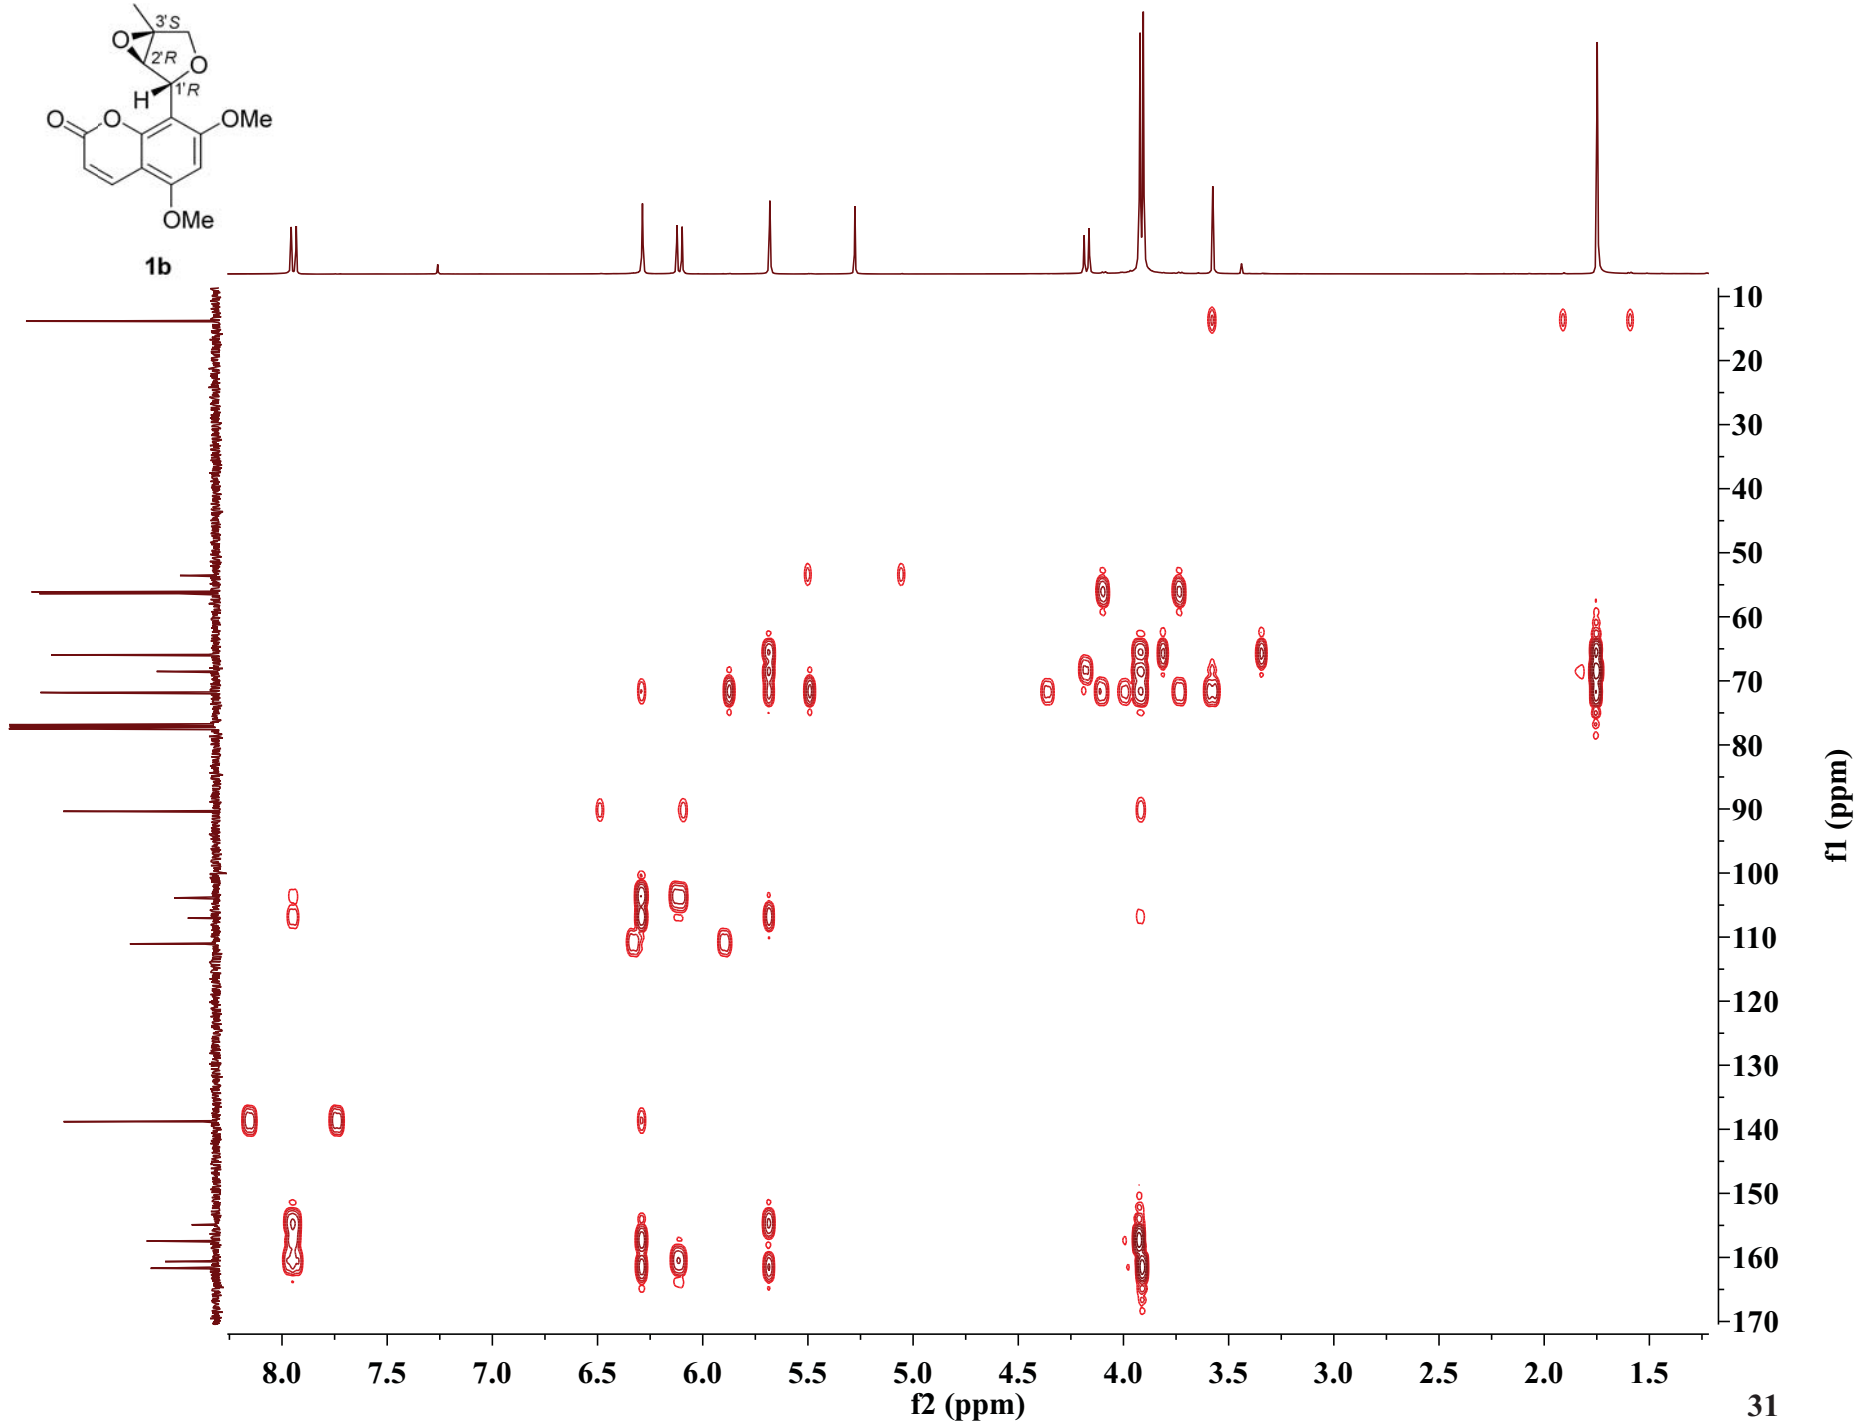

### S4.6. NOESY spectrum of compound 1

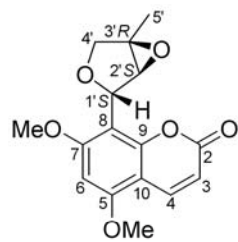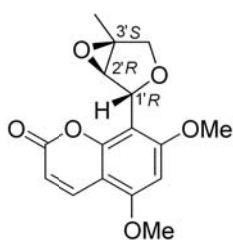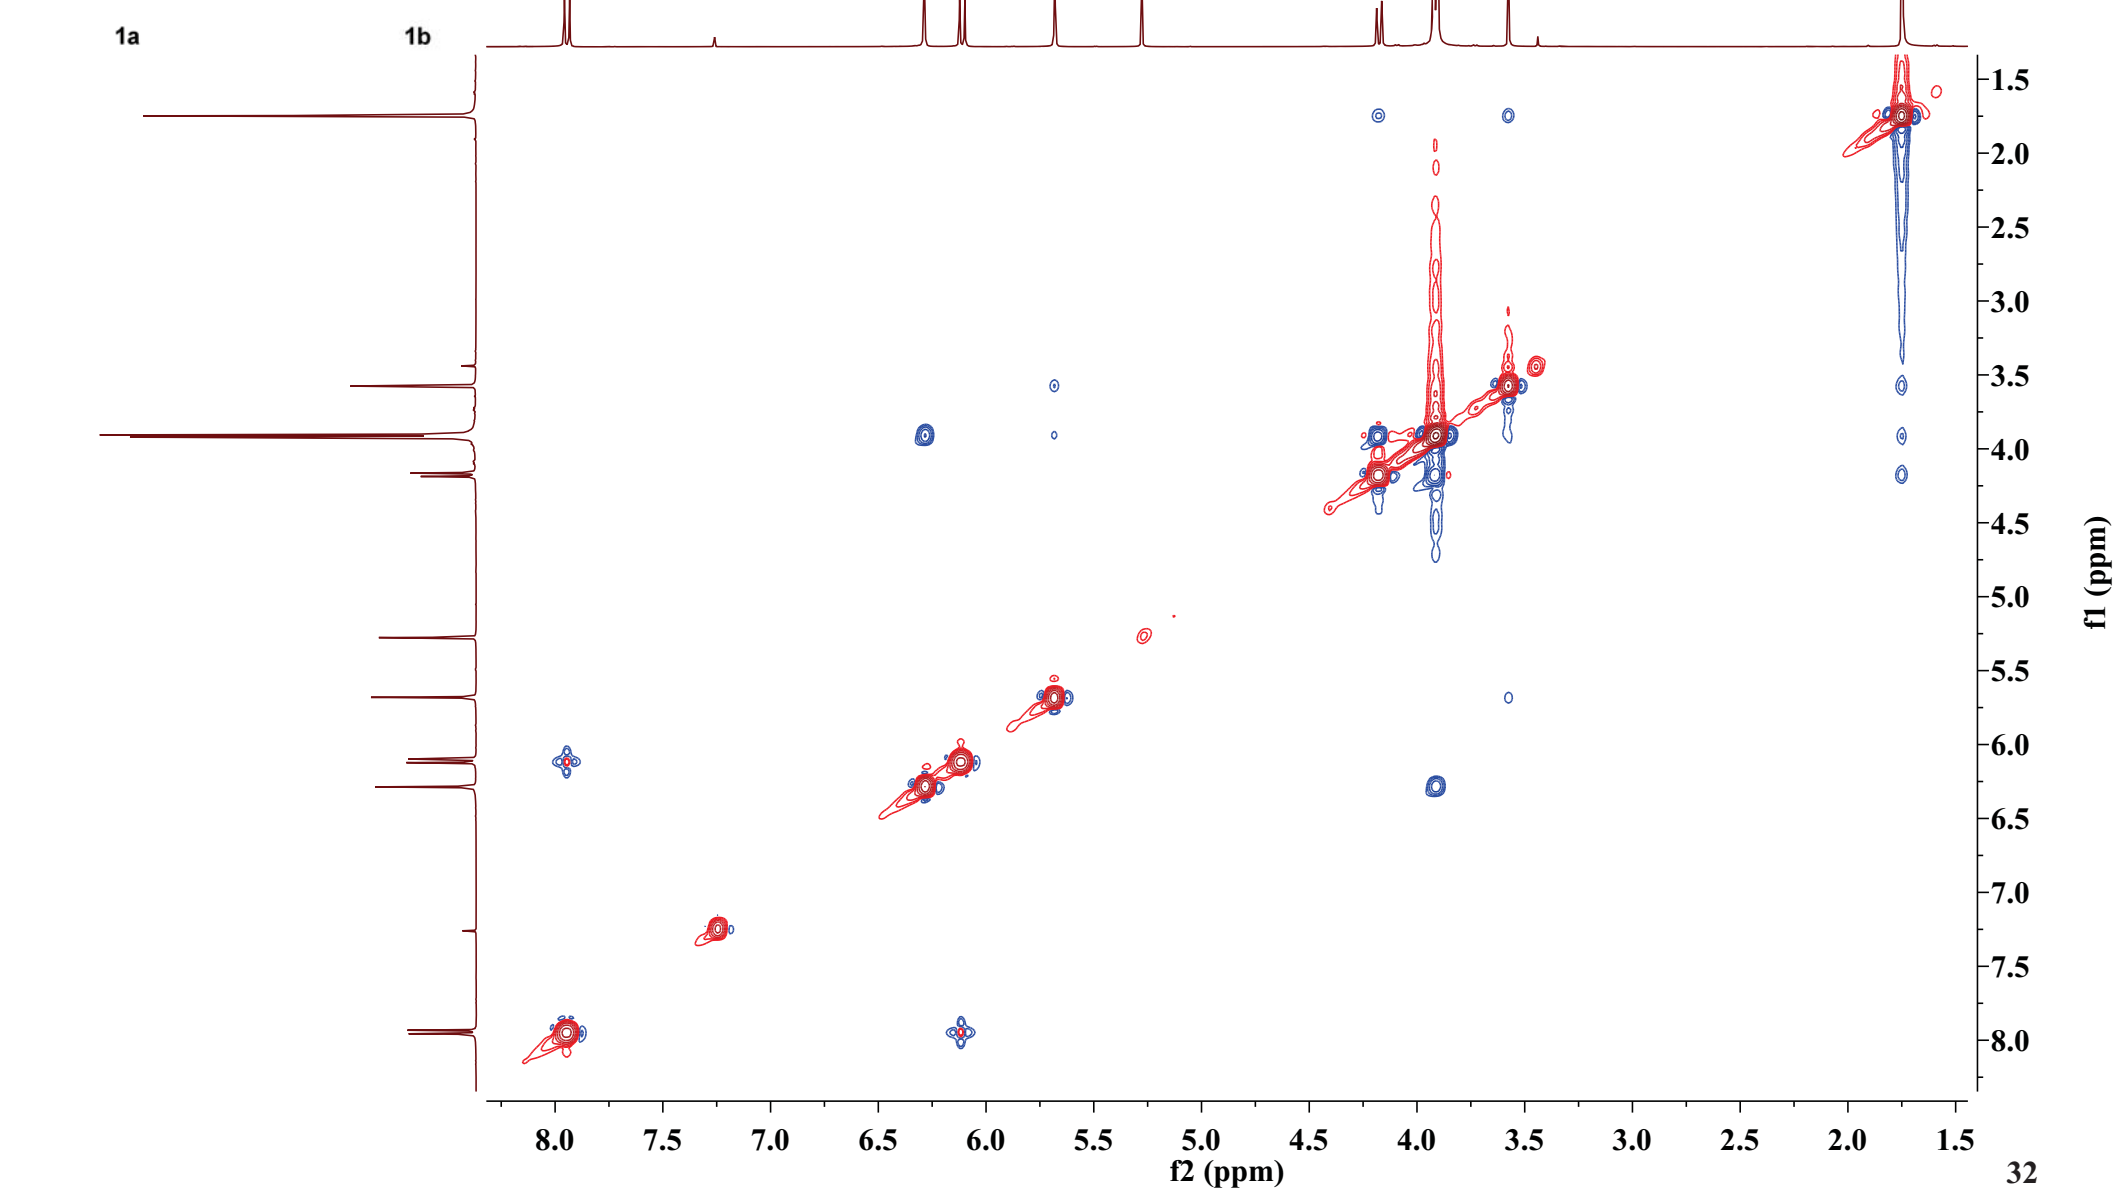



### S4.7. <sup>1</sup>H NMR spectrum of compound 2

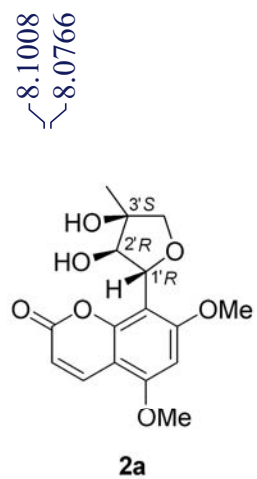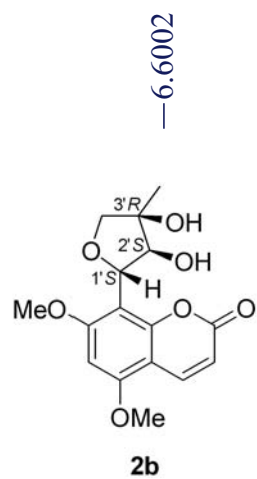

8.1008  
8.0766

6.6002

6.1543  
6.1301

5.4837  
5.4625

4.8477

4.4604  
4.4391

4.2118  
4.1888

3.9859  
3.9663

3.8800  
3.8571

3.3490  
3.3183

3.3143  
3.3102

3.3061  
3.3020

1.3754

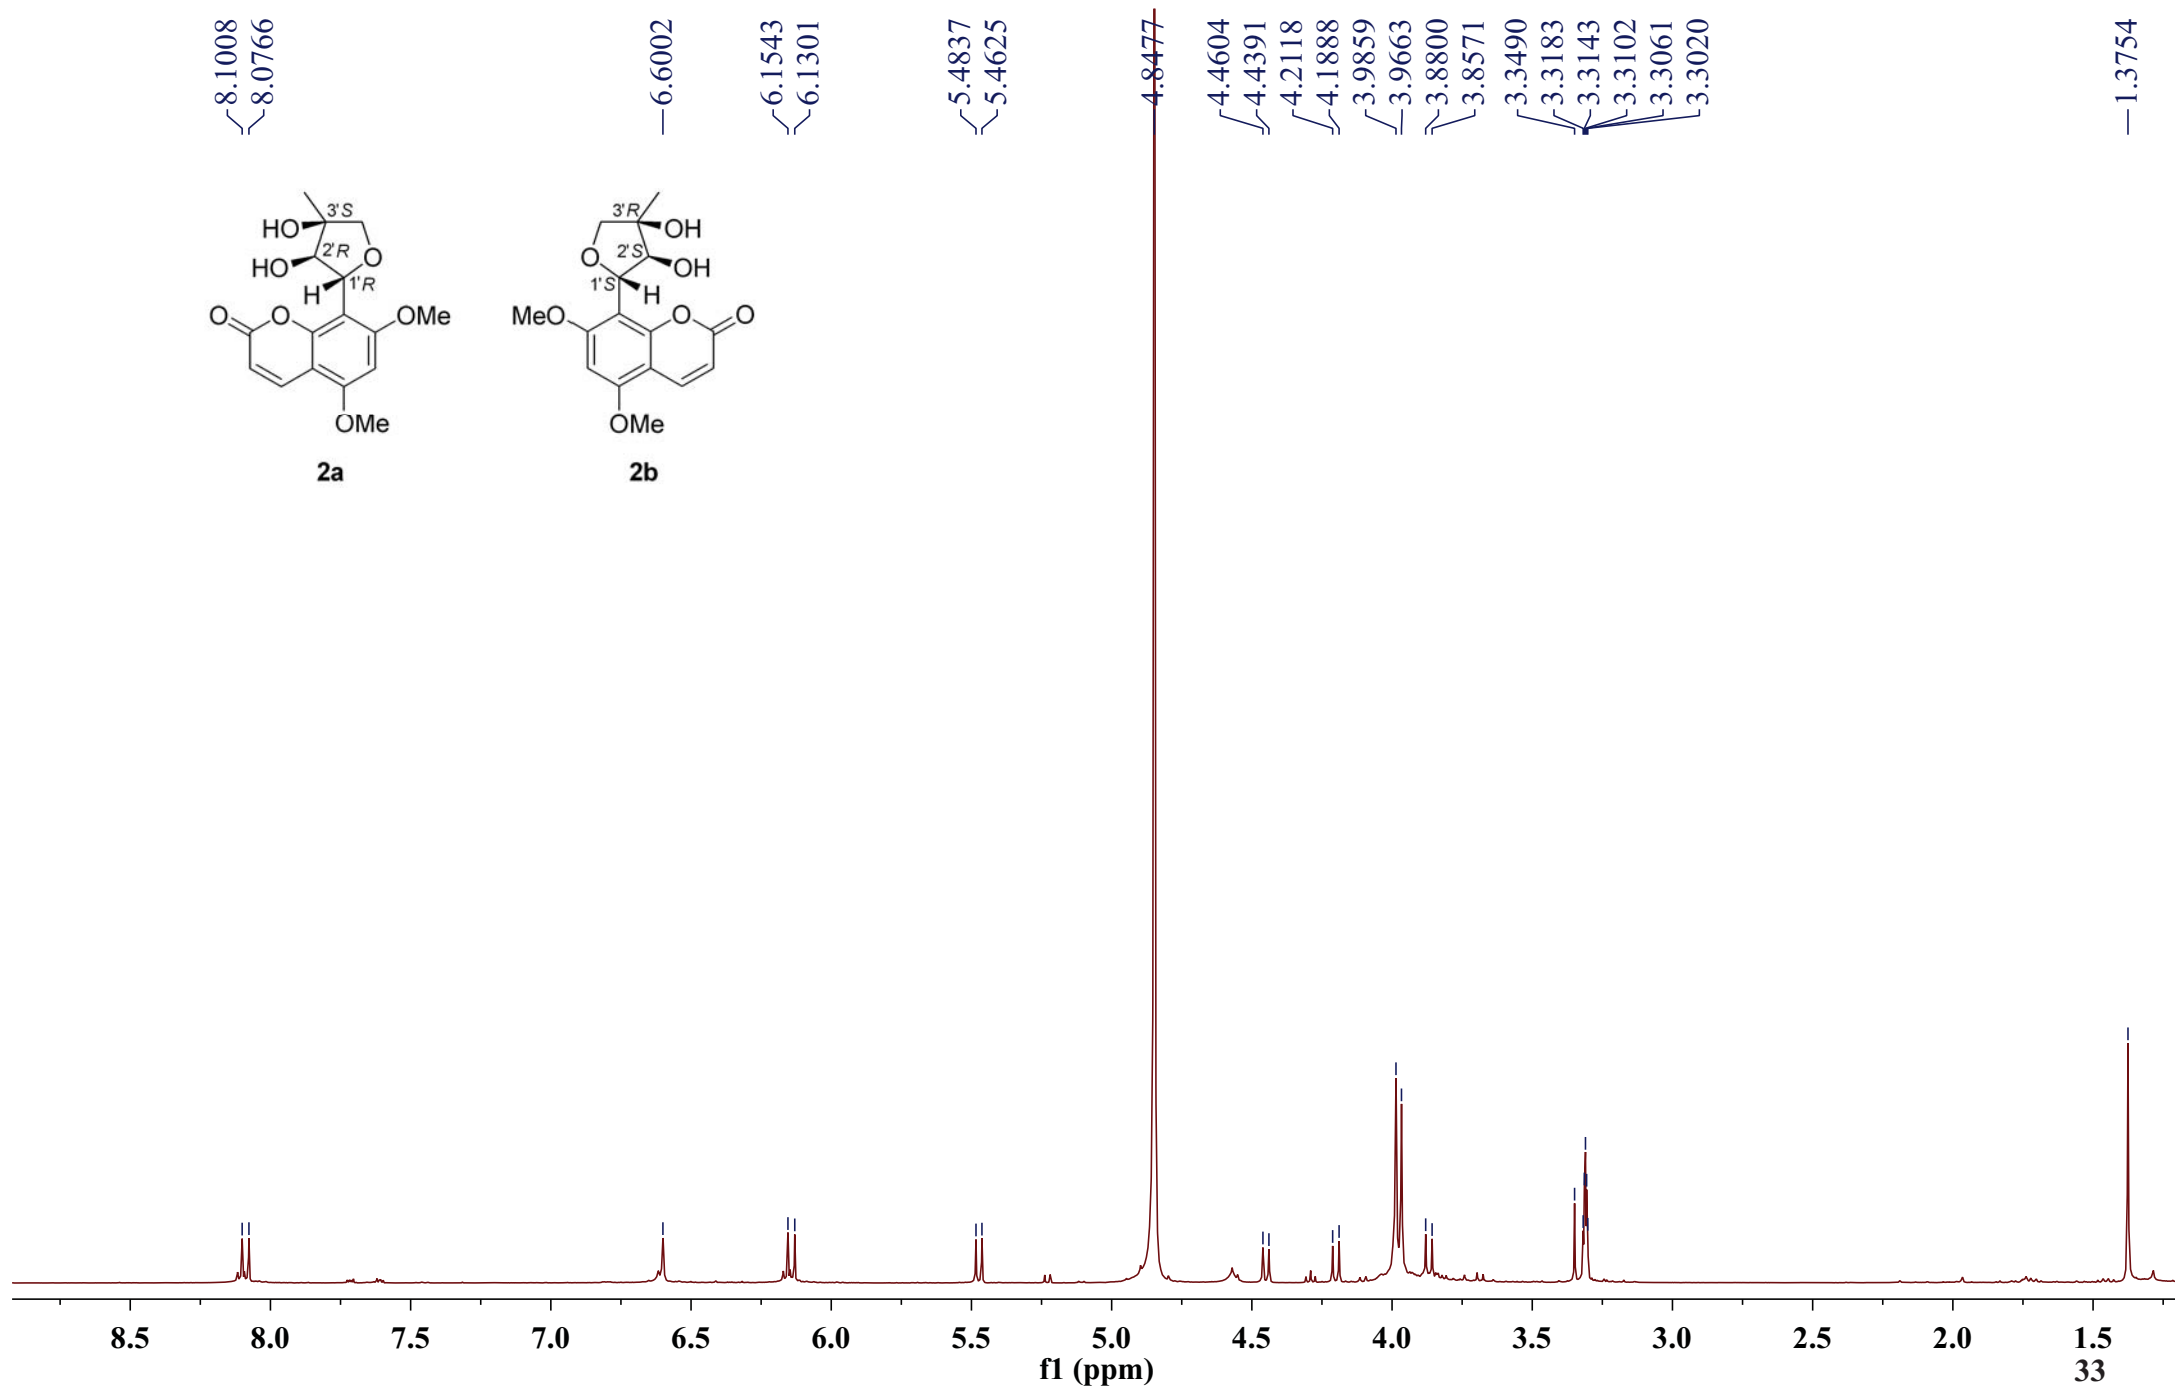

### S4.8. $^{13}\text{C}$ NMR and DEPT spectra of compound 2

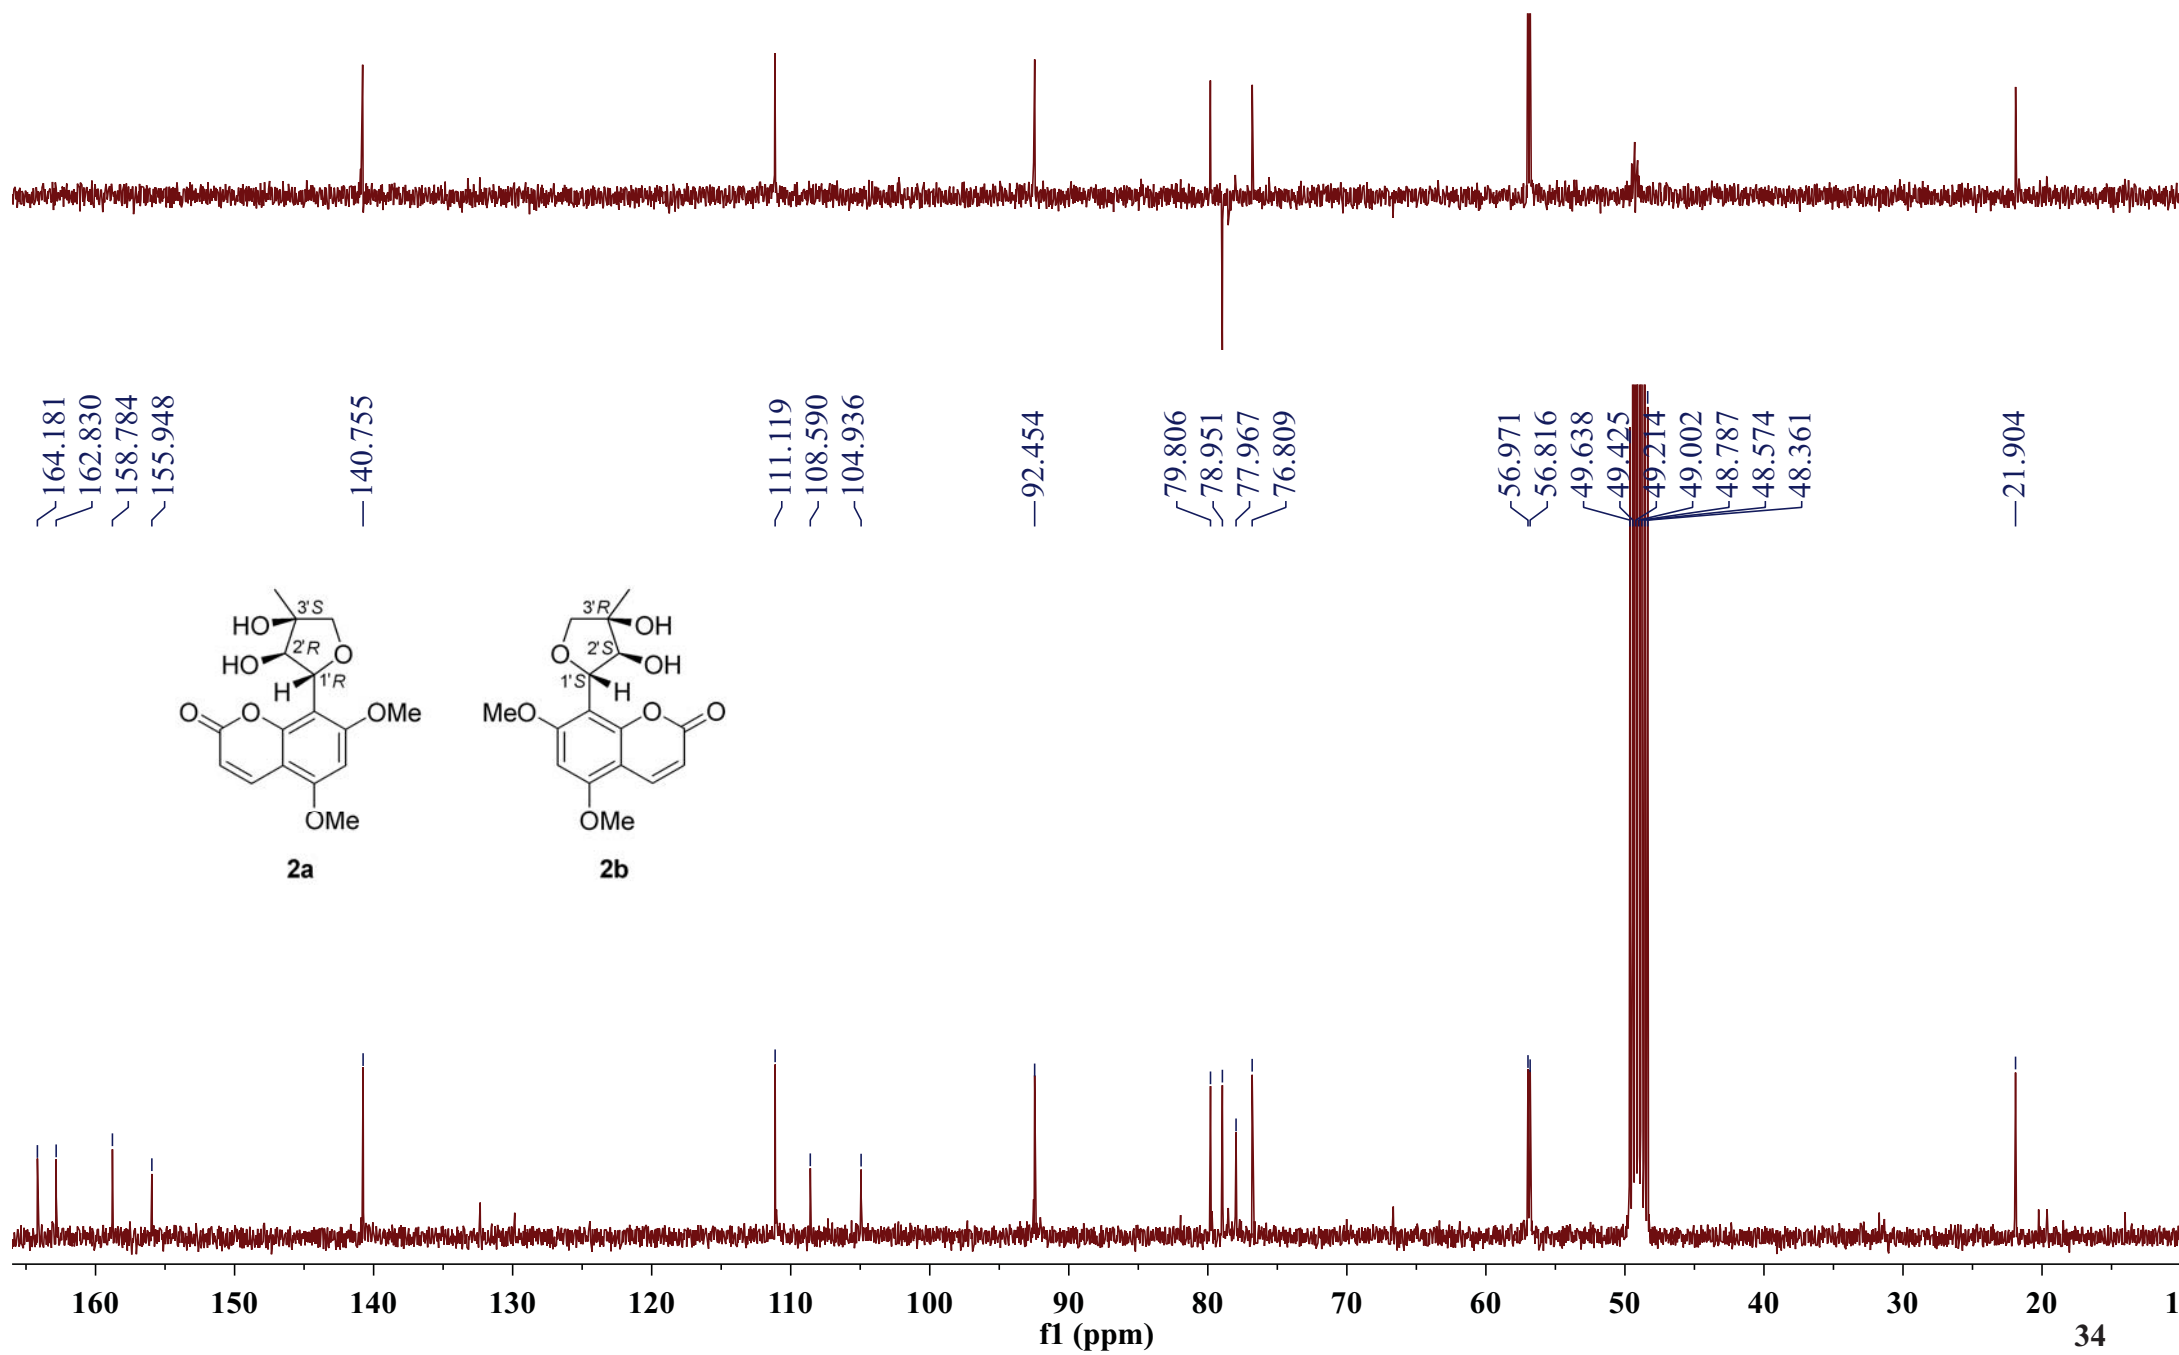

### S4.9. HSQC spectrum of compound 2

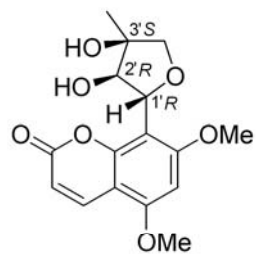

2a

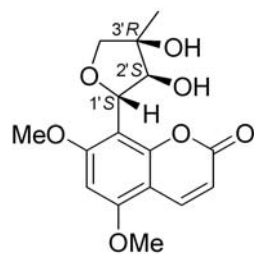

2b

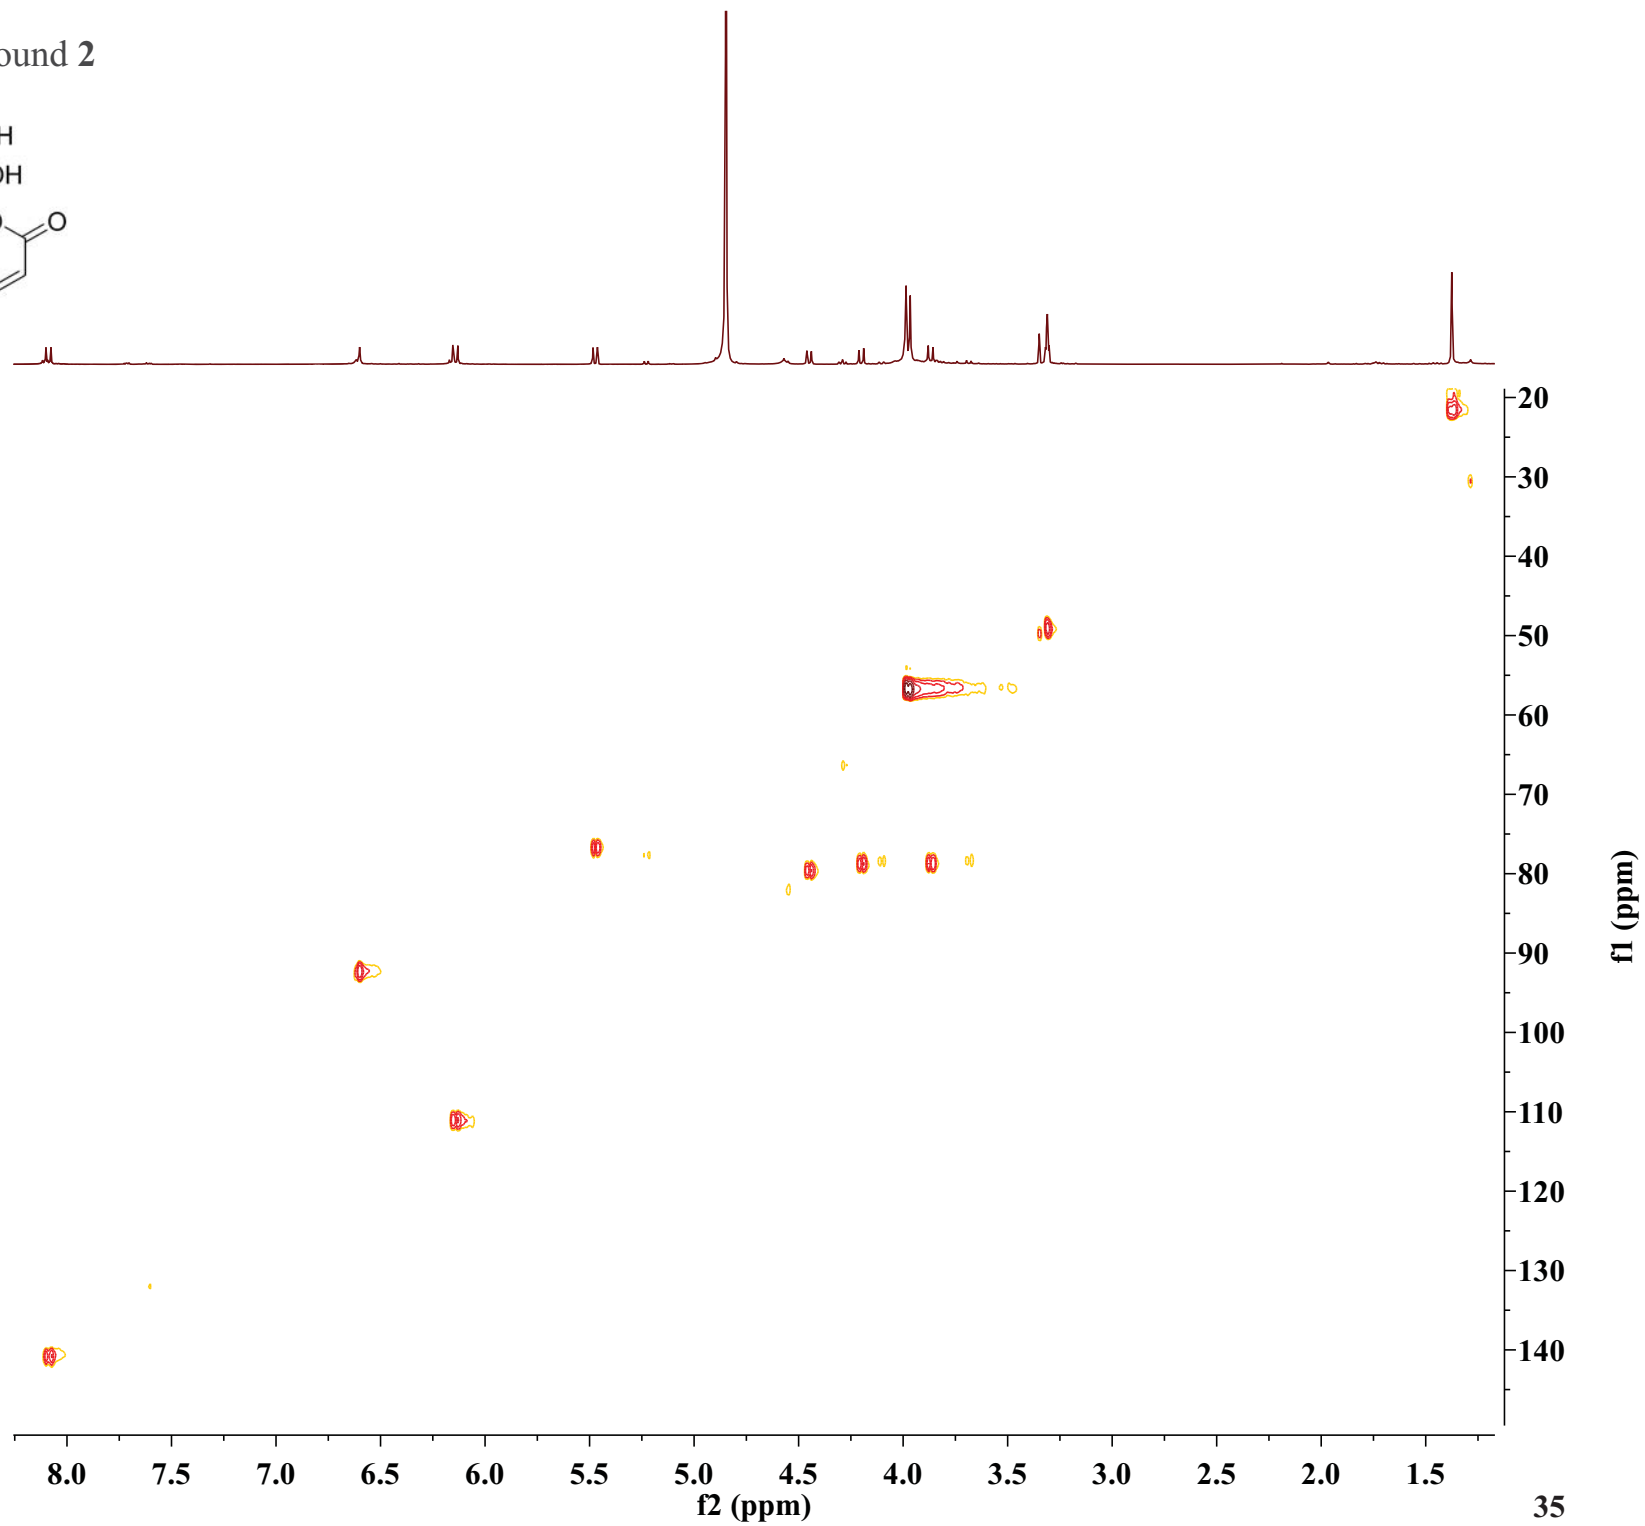

S4.10.  $^1\text{H}$ - $^1\text{H}$  COSY spectrum of compound 2

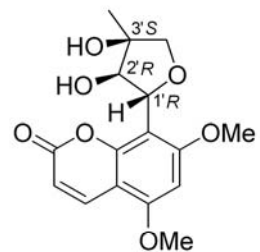

2a

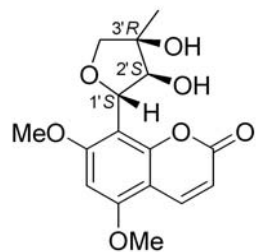

2b

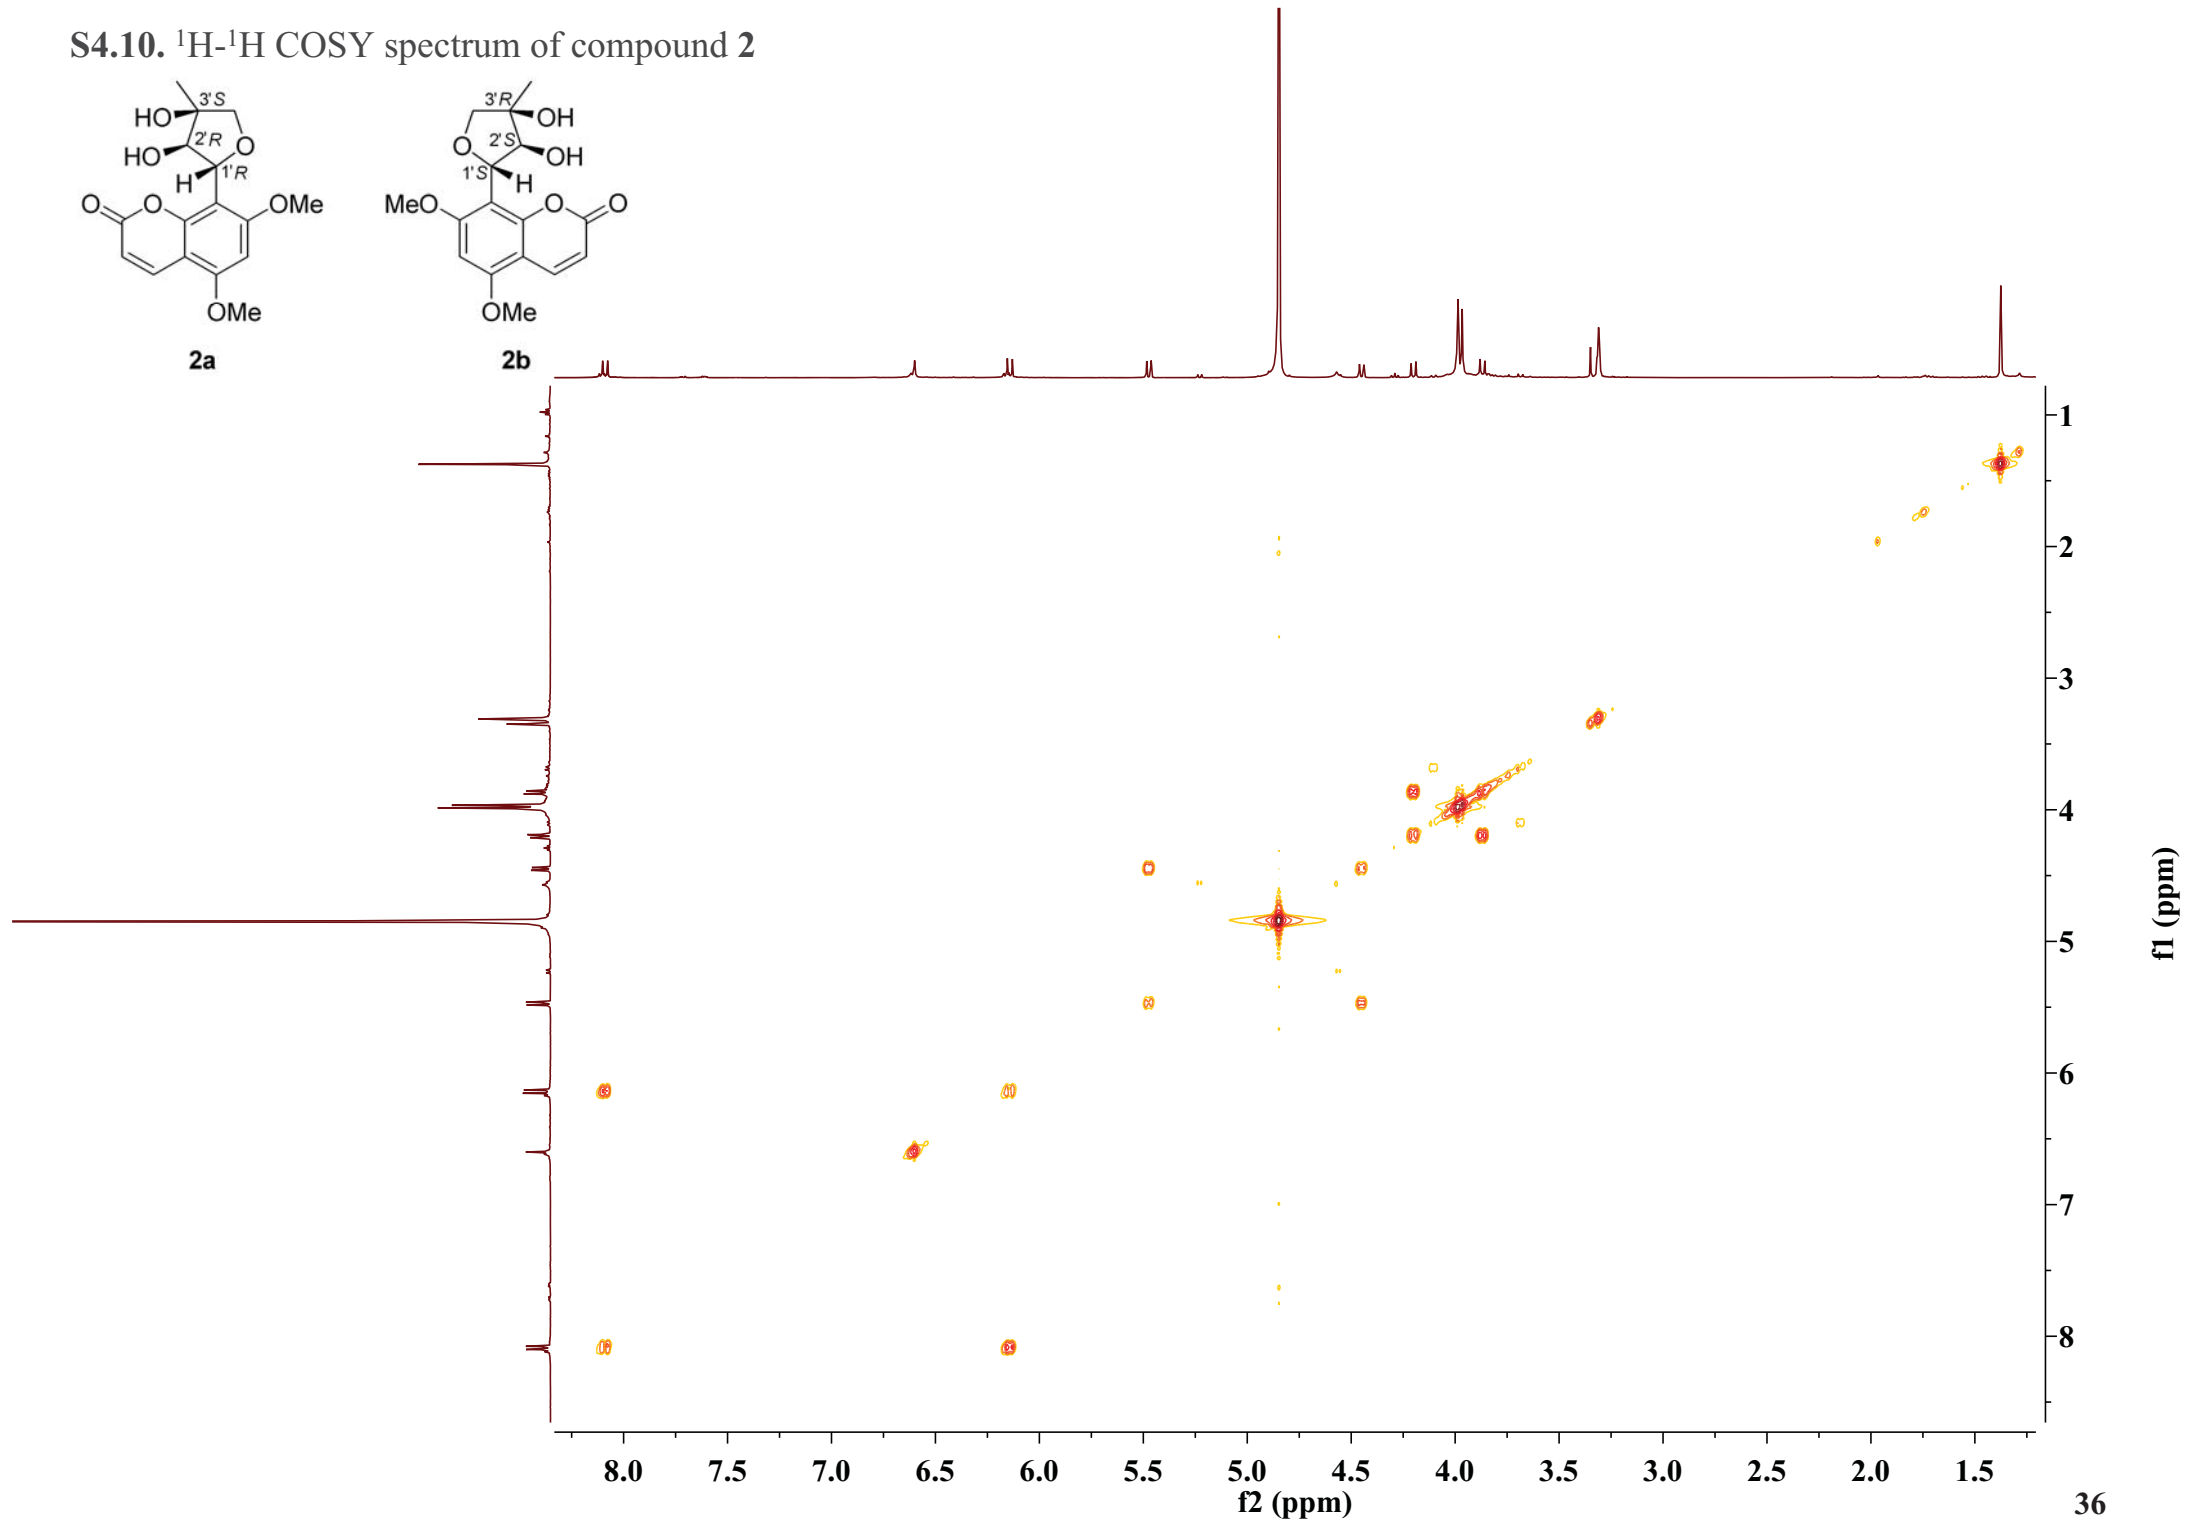

### S4.11. HMBC spectrum of compound 2

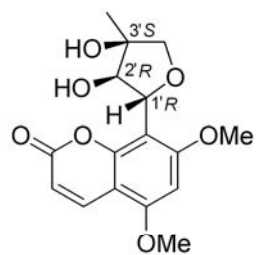

2a

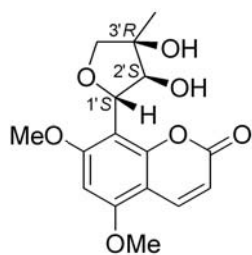

2b

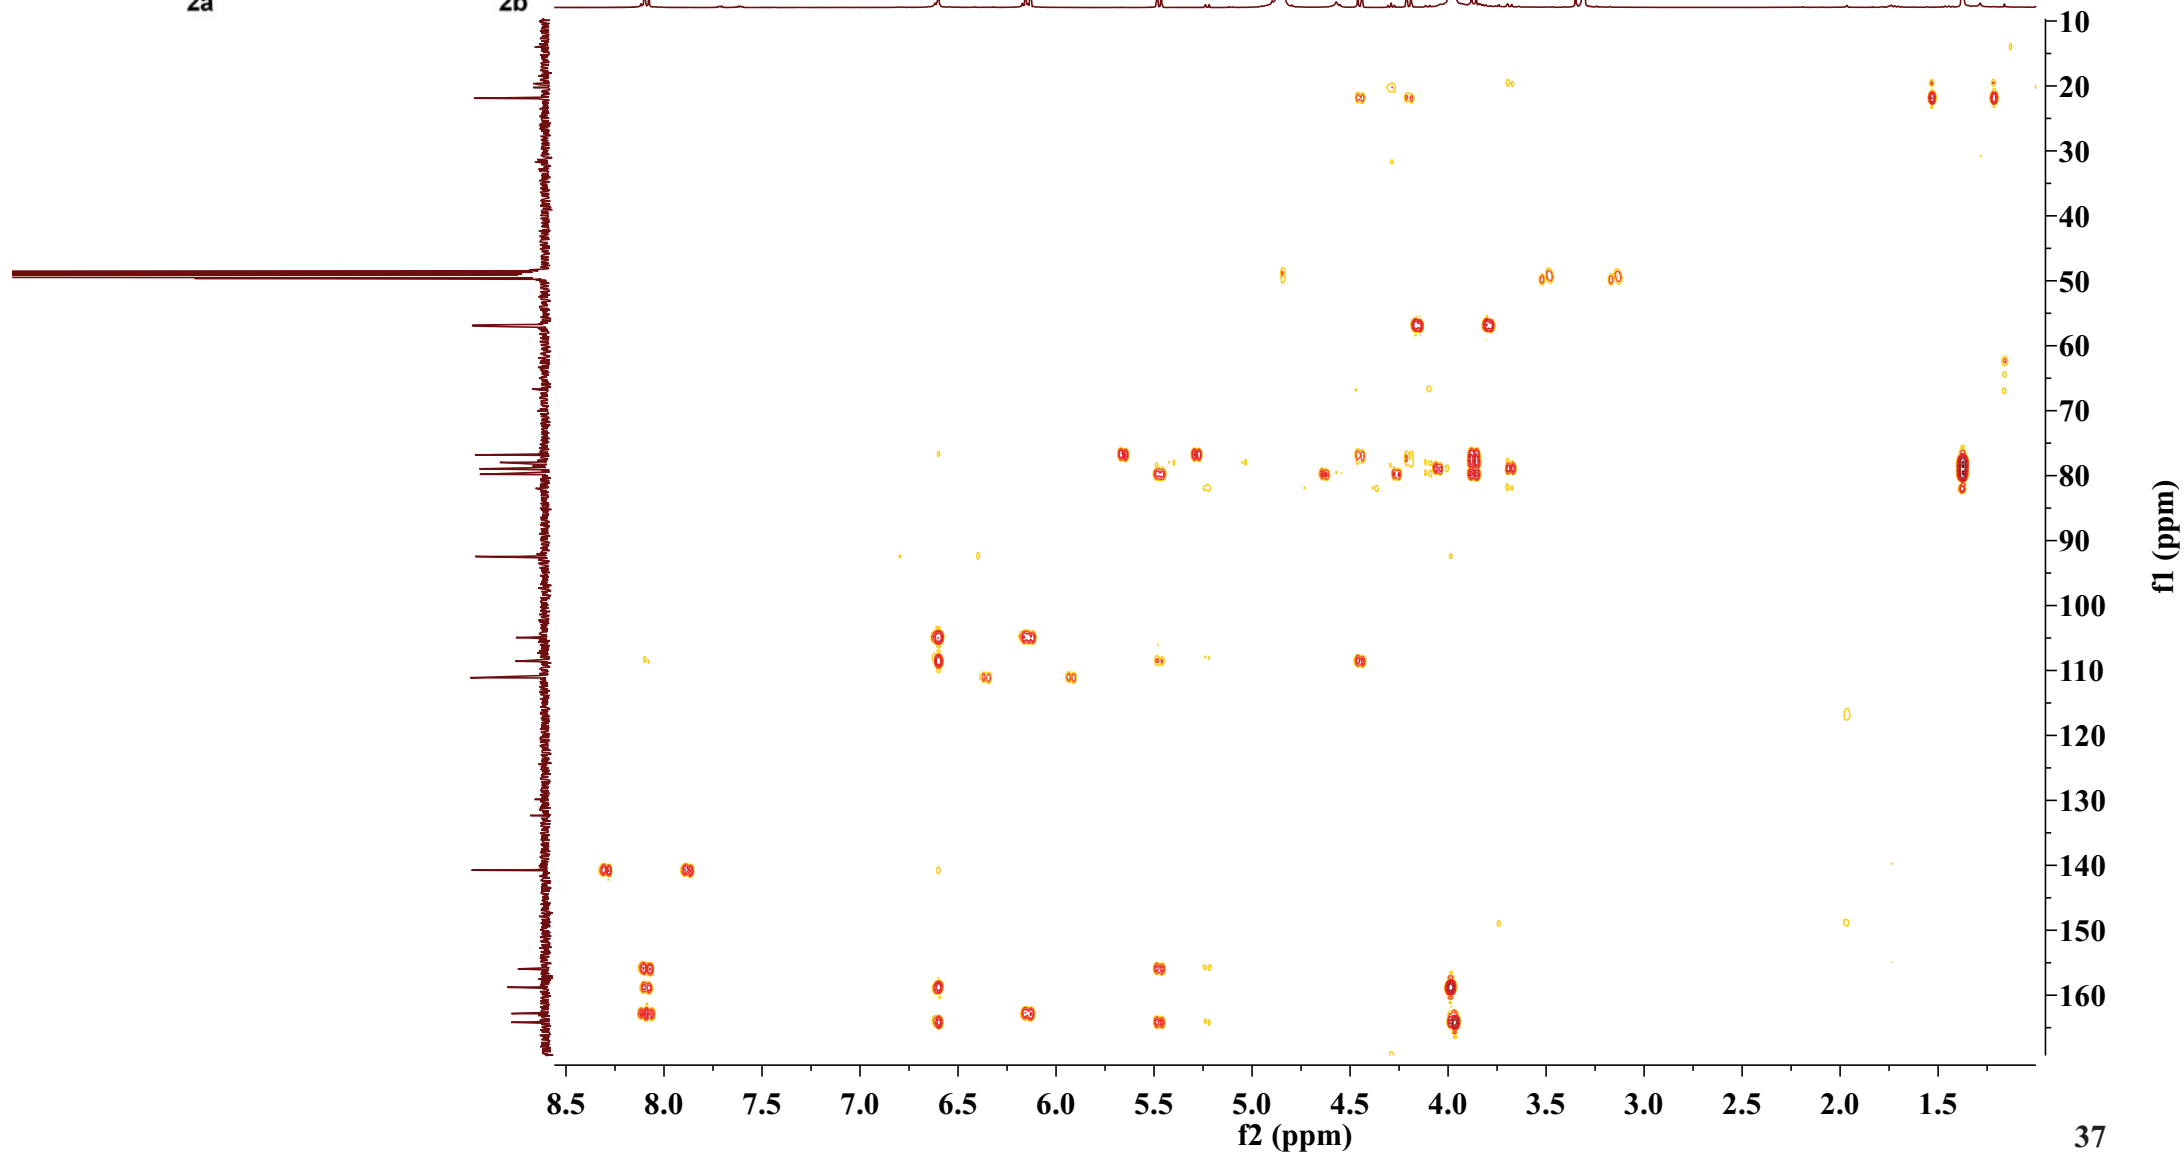

### S4.12. NOESY spectrum of compound 2

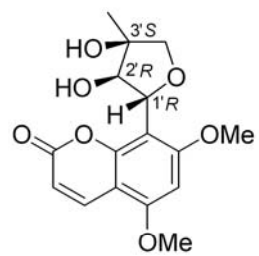

2a

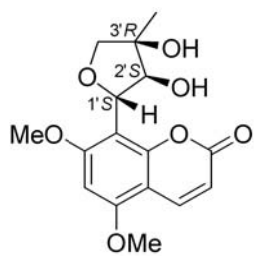

2b

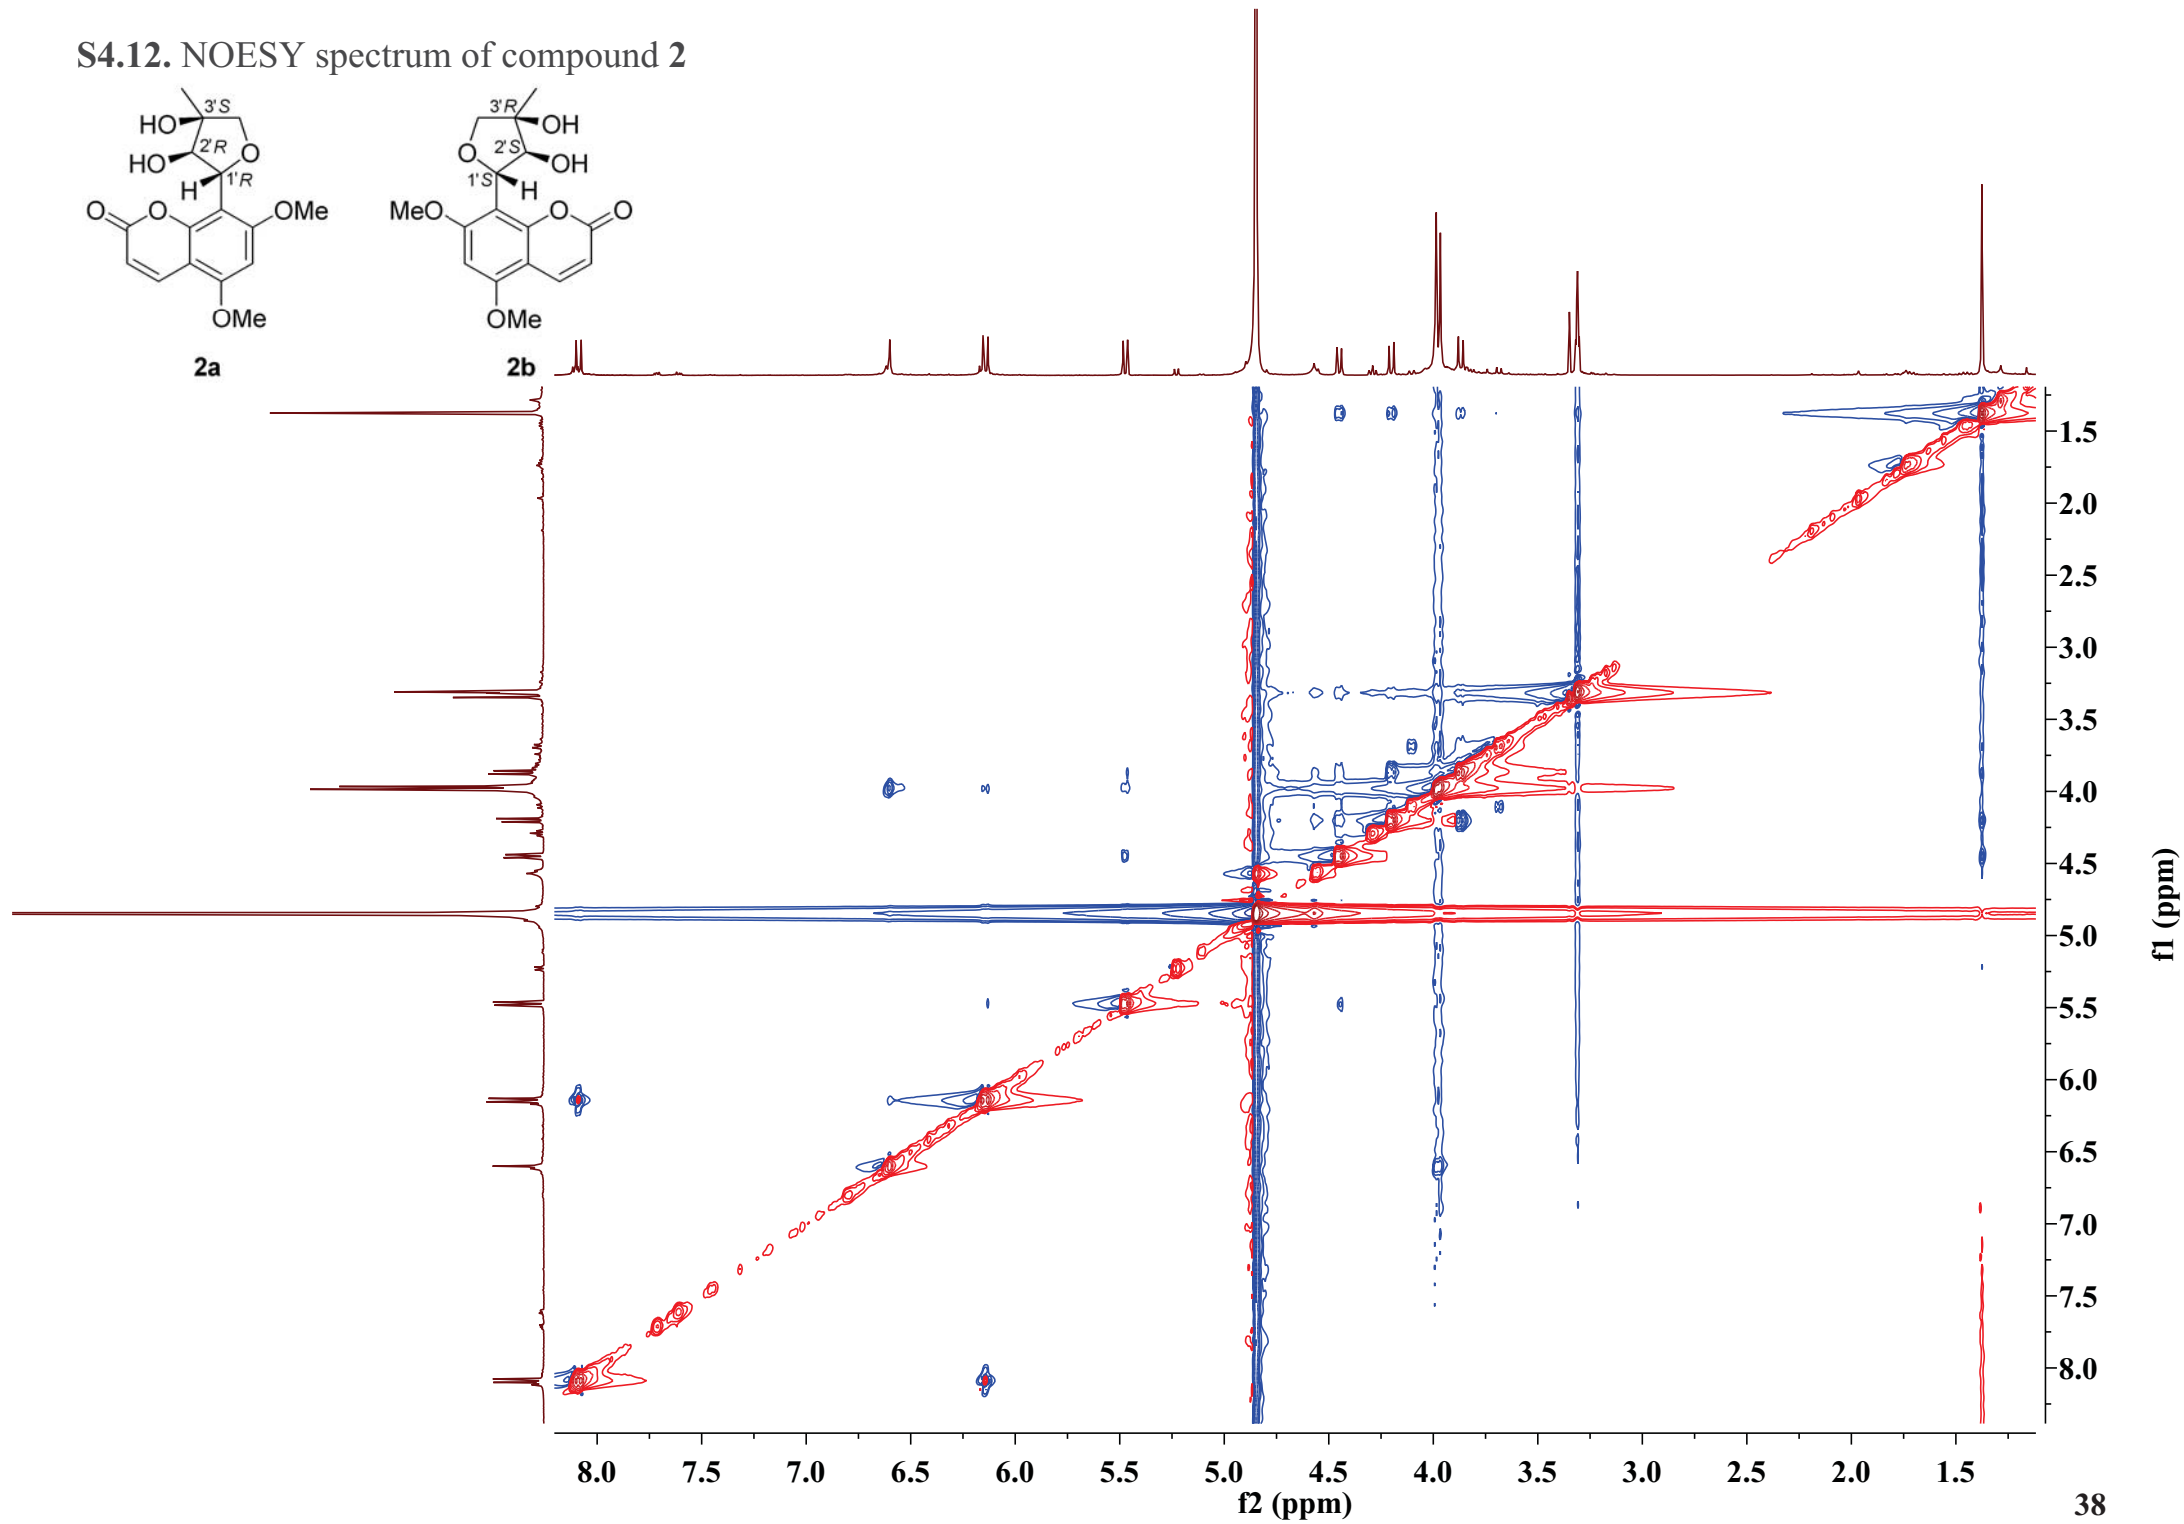

S4.13. <sup>1</sup>H NMR spectrum of compound 3

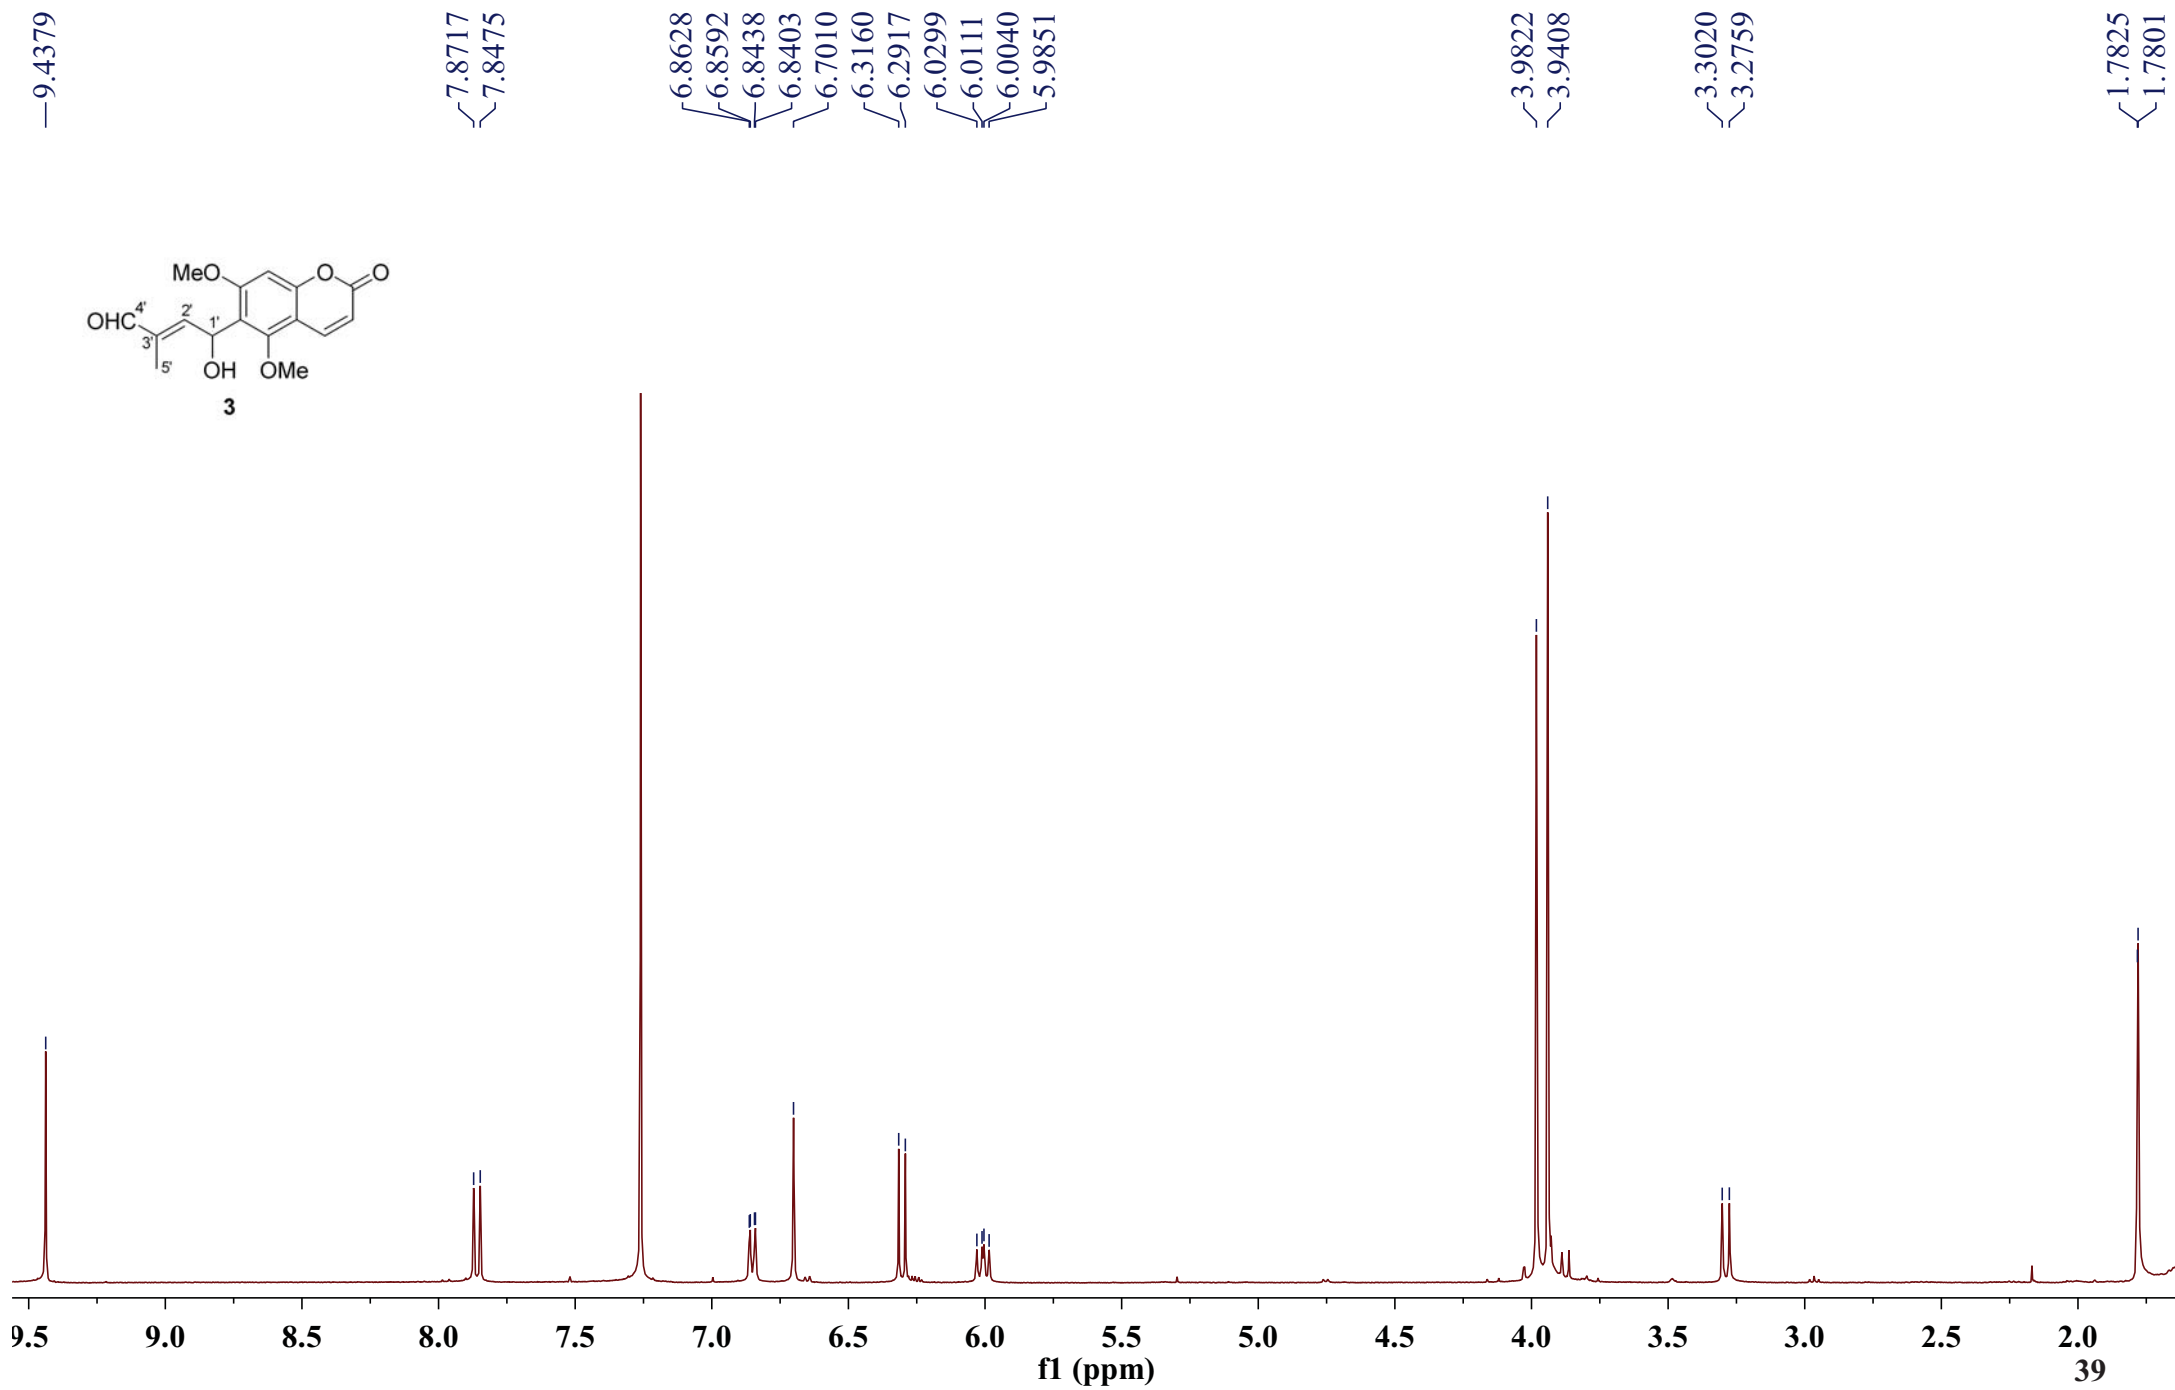

### S4.14. <sup>13</sup>C NMR and DEPT spectra of compound 3

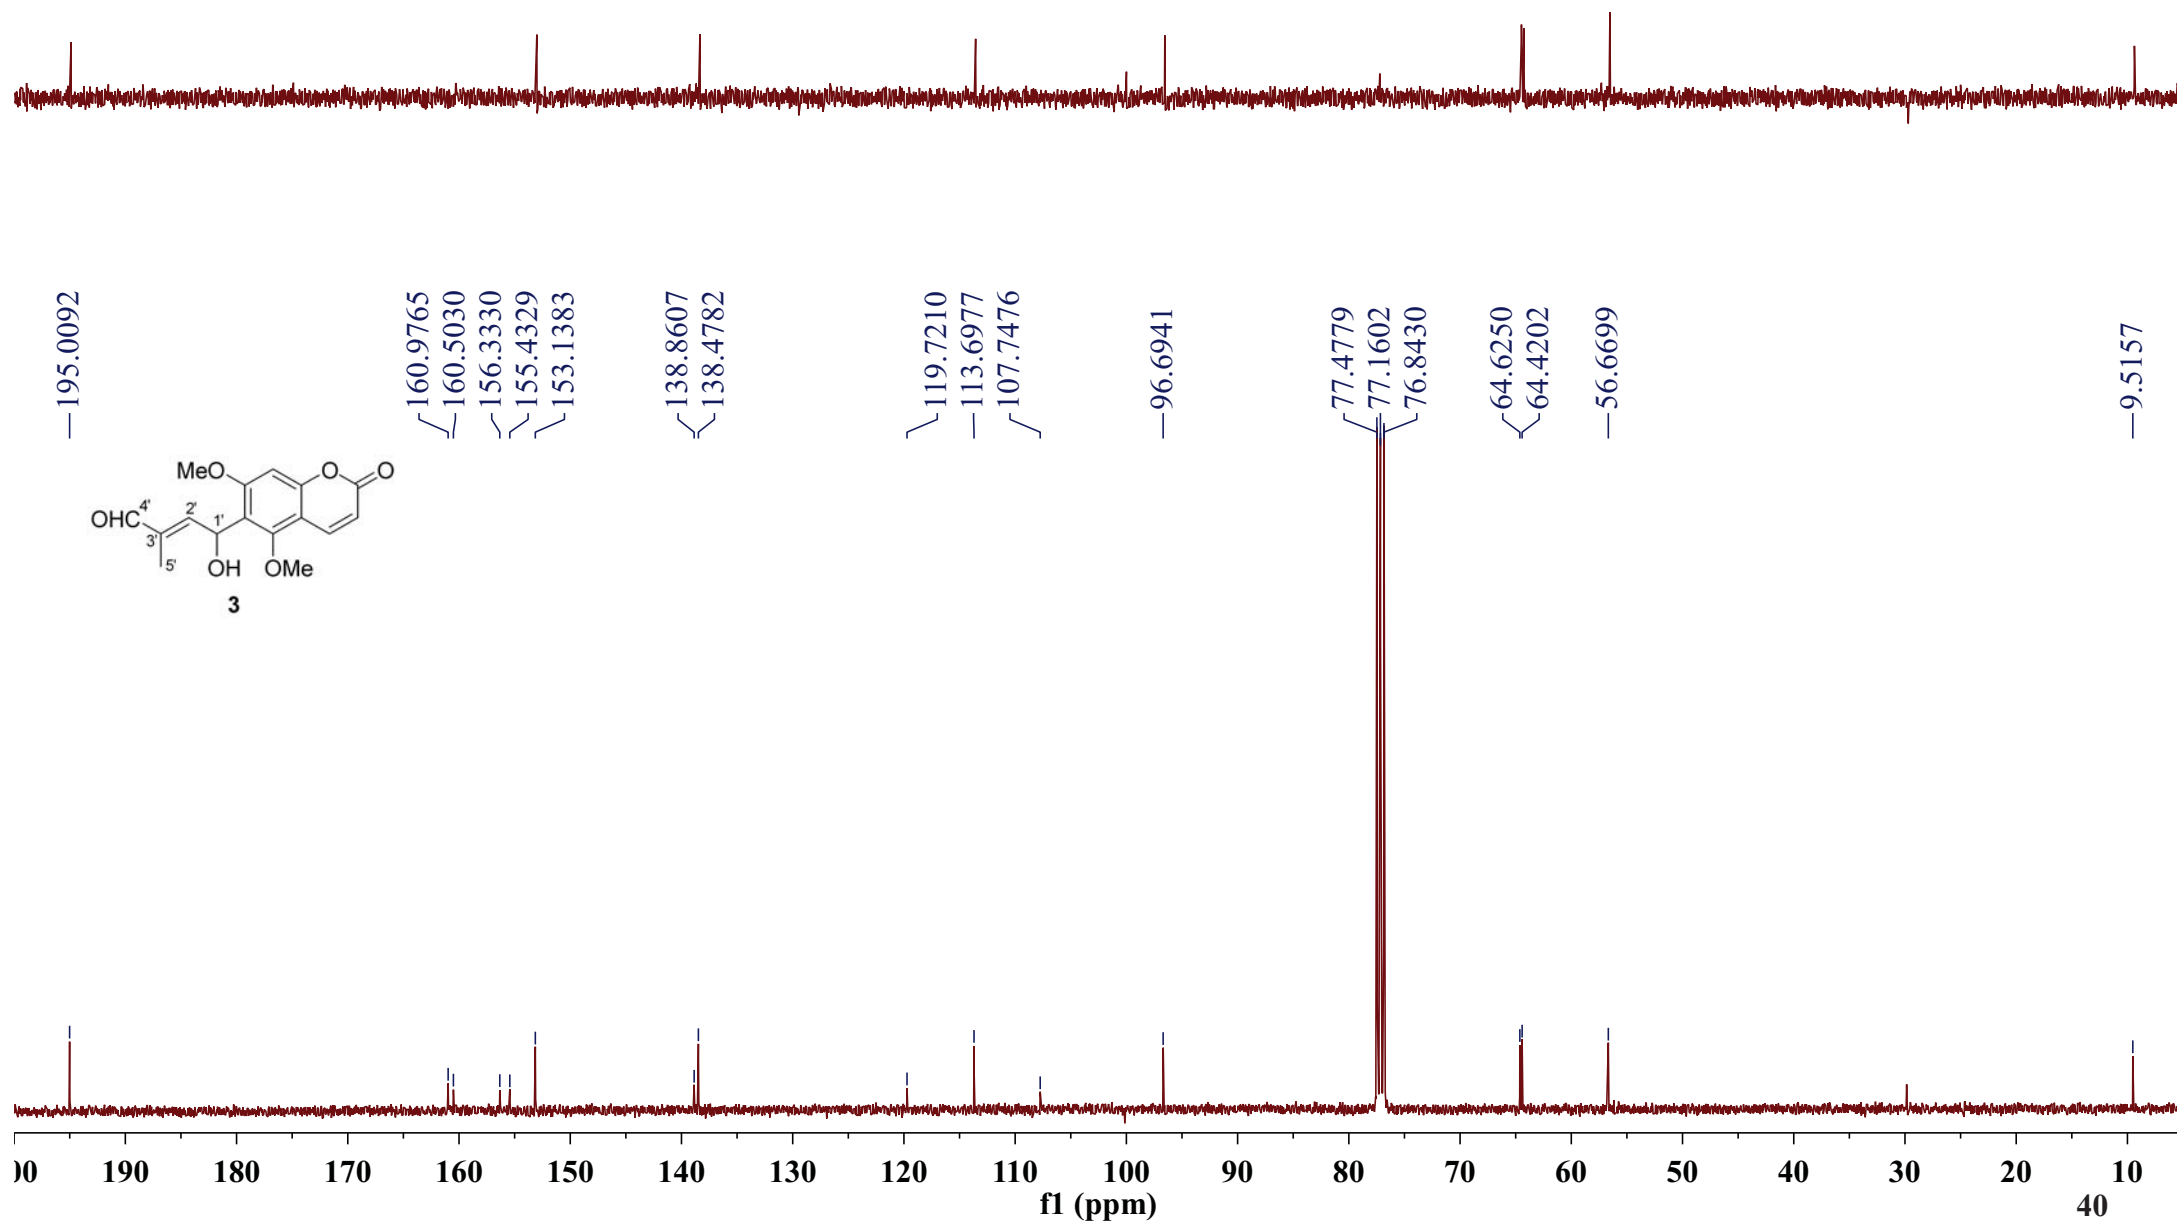



### S4.15. HSQC spectrum of compound 3

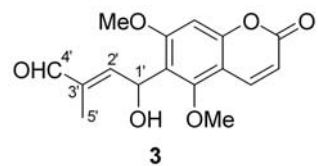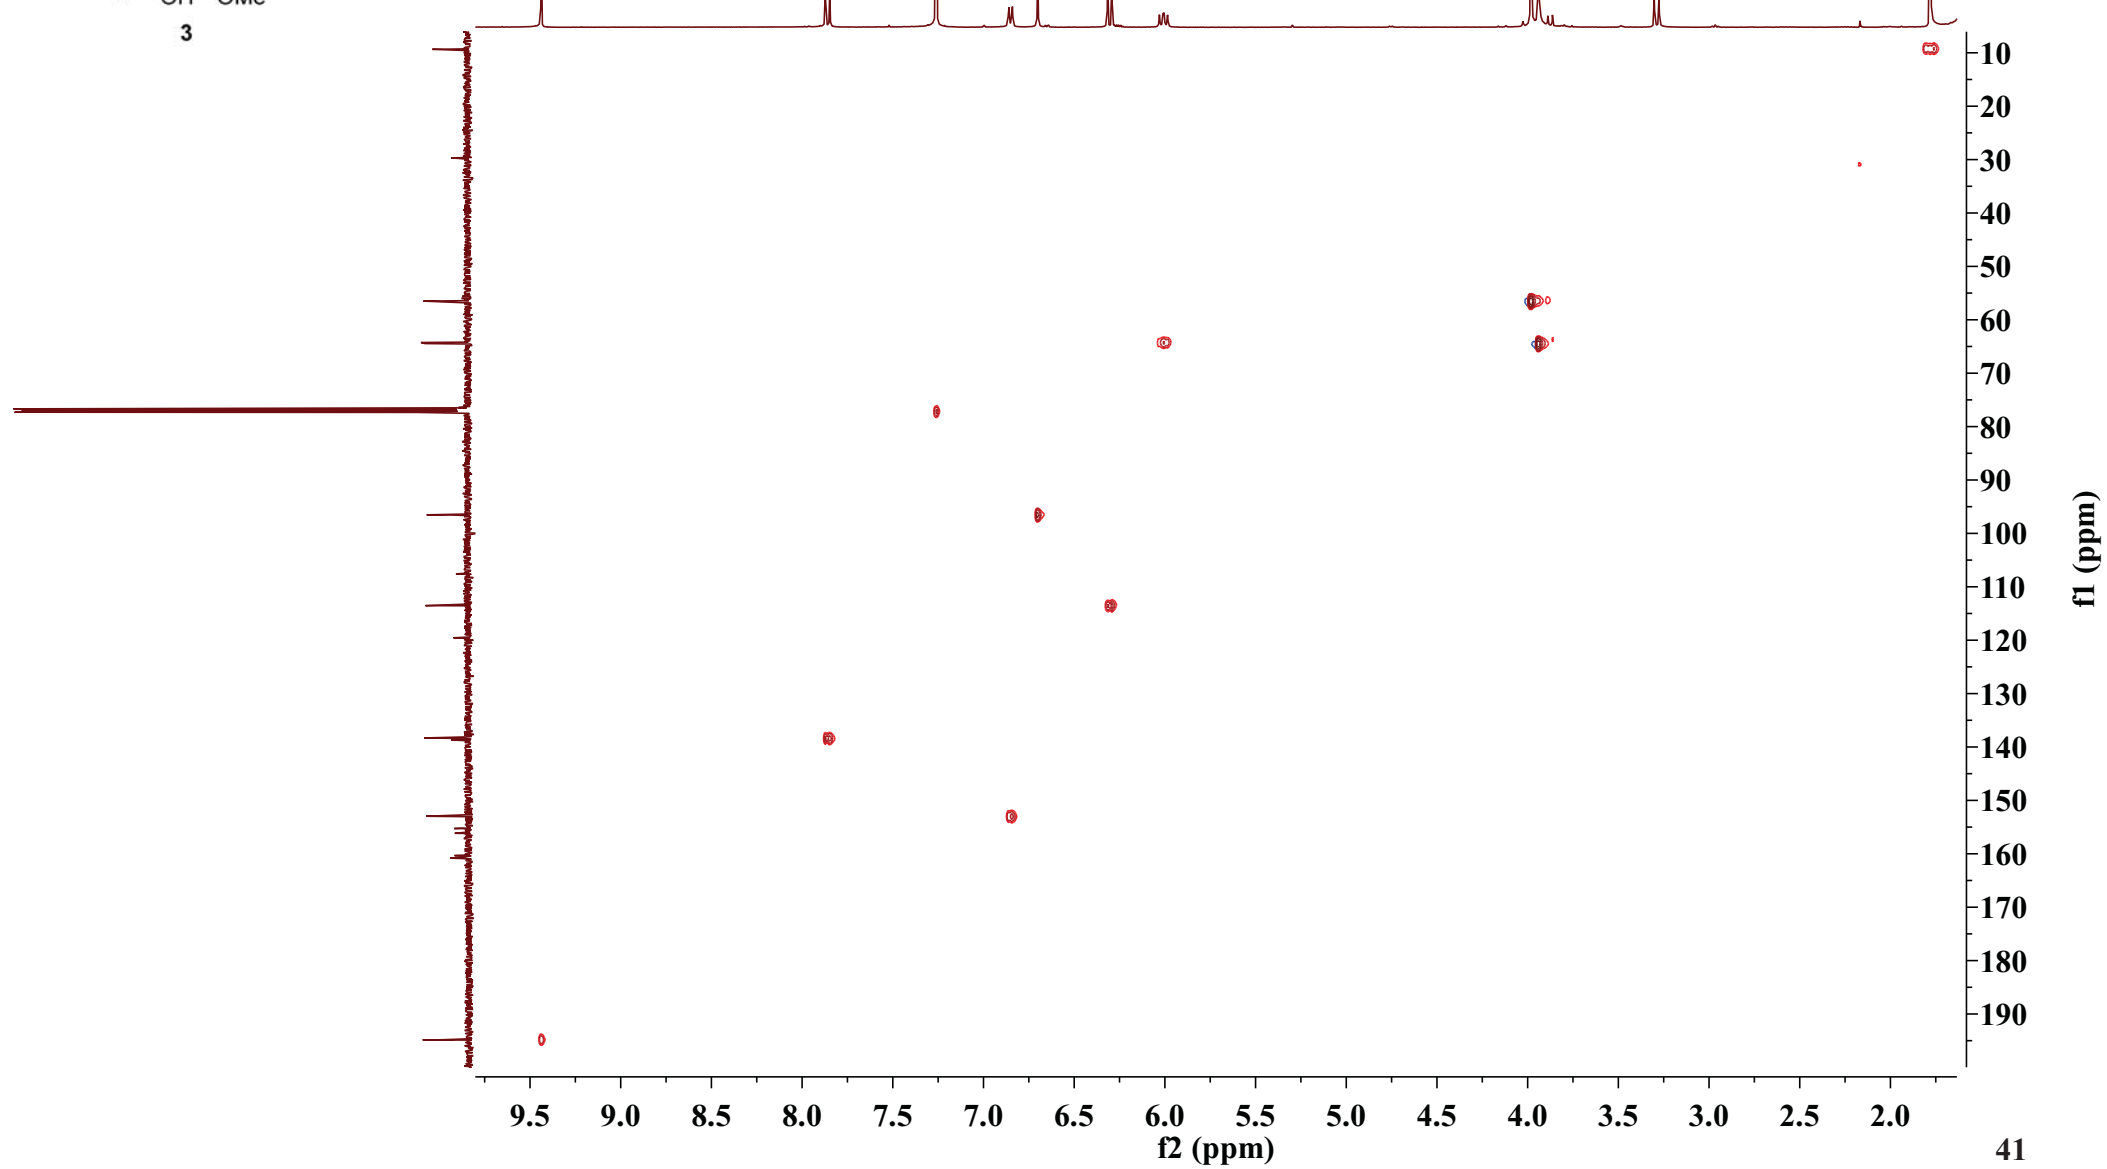

S4.16.  $^1\text{H}$ - $^1\text{H}$  COSY spectrum of compound 3

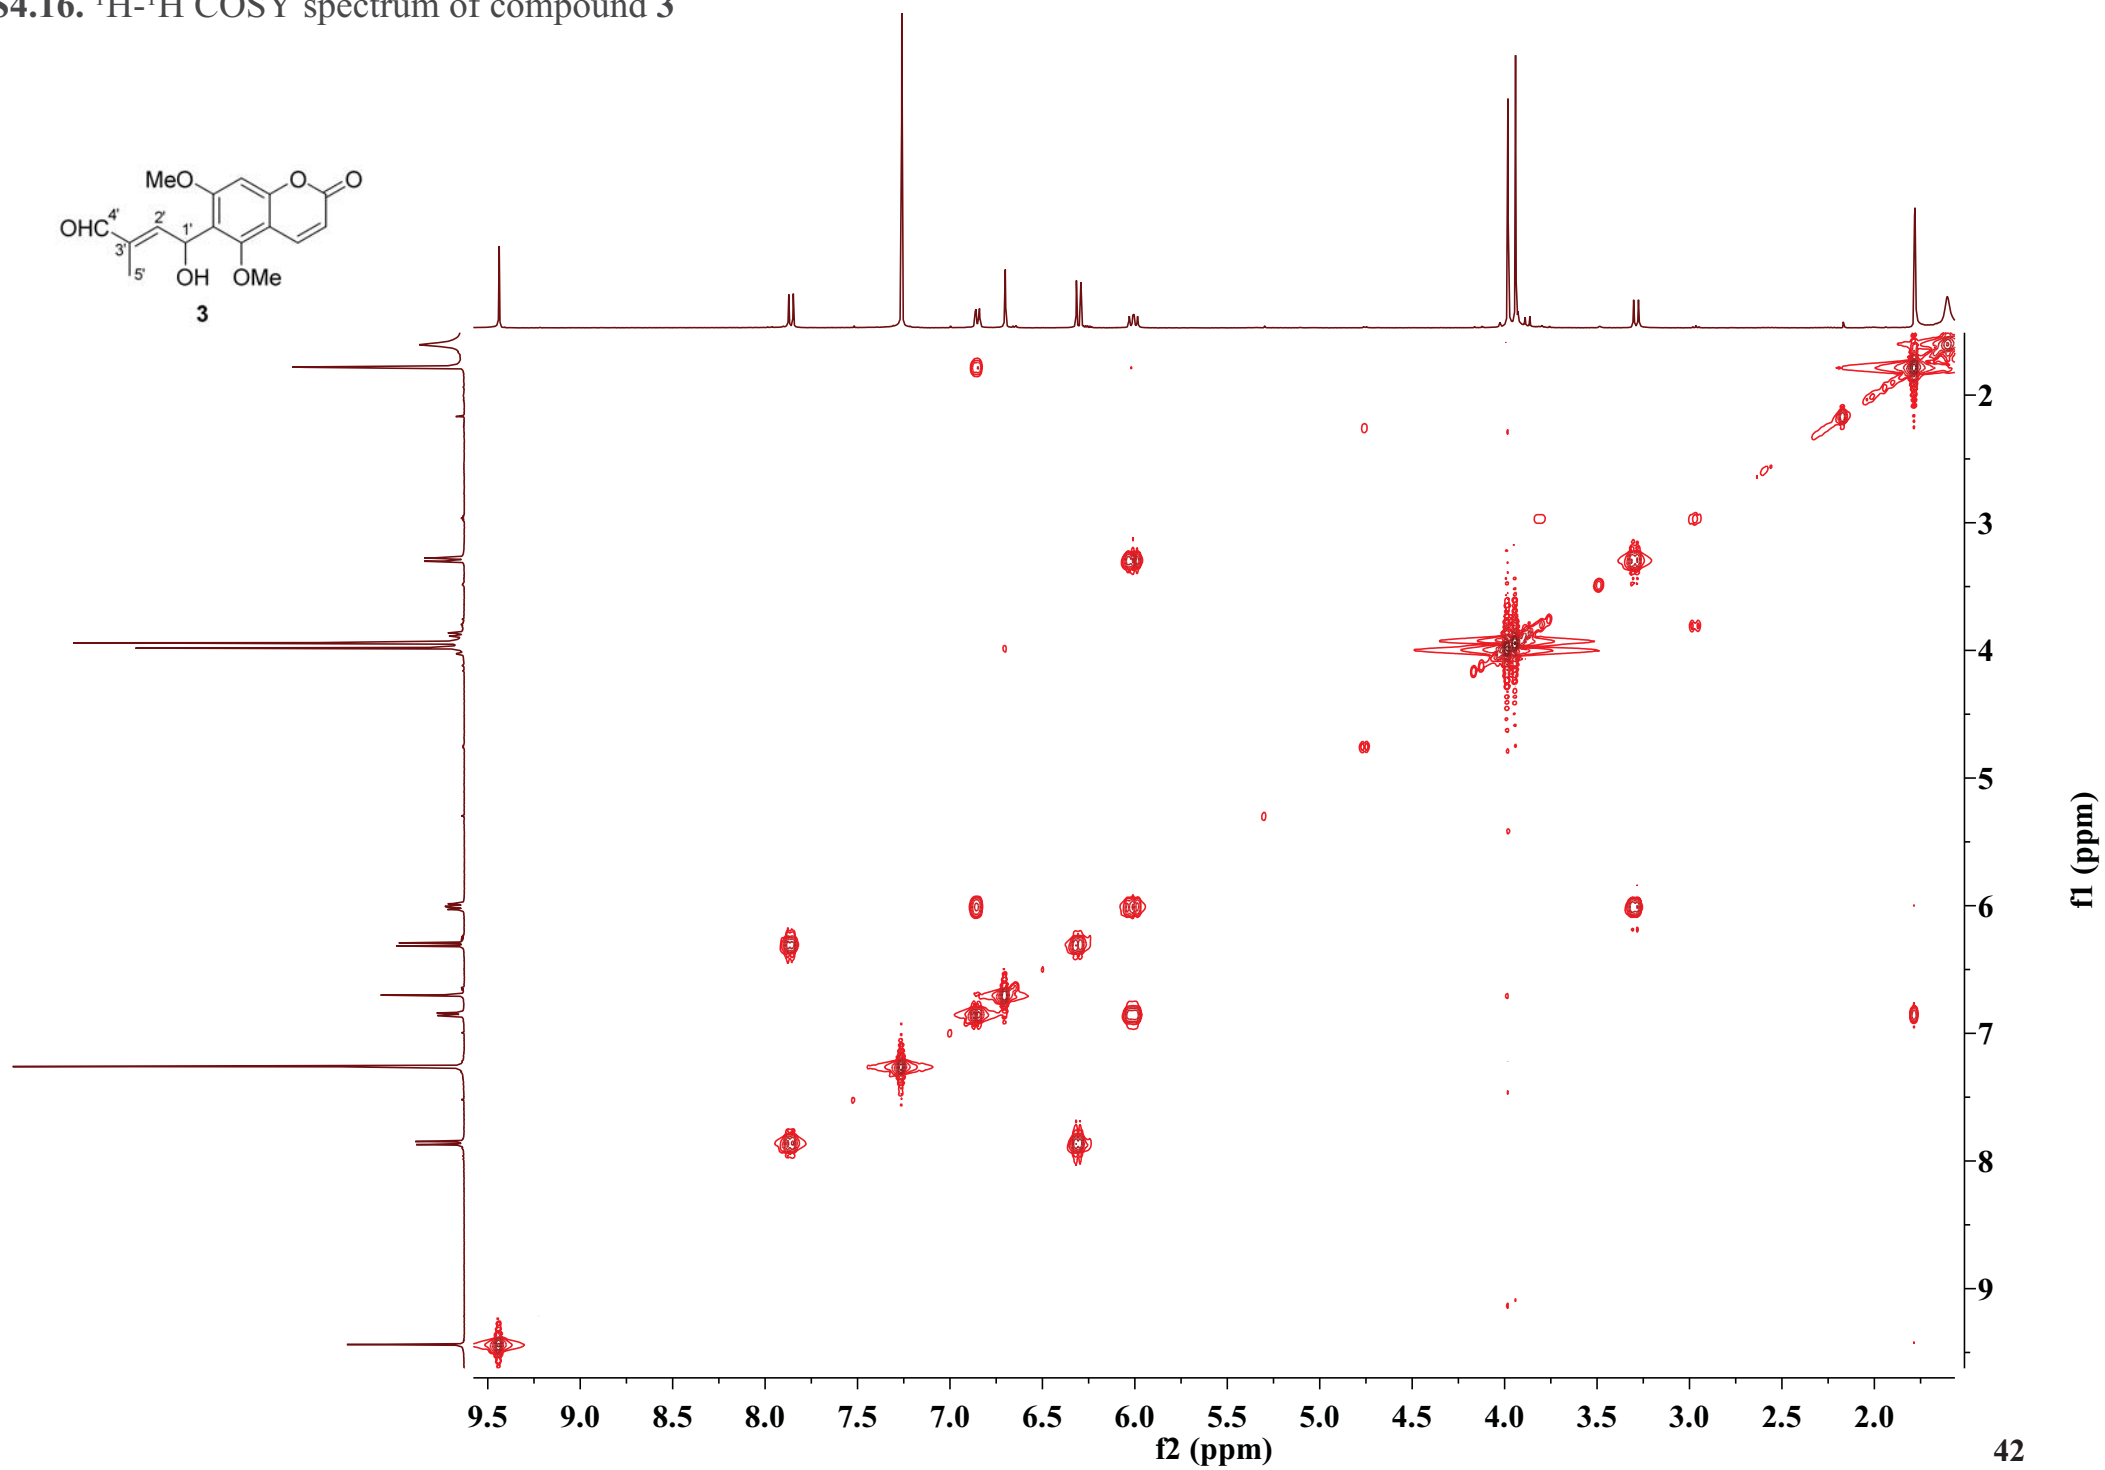

S4.17. HMBC spectrum of compound 3

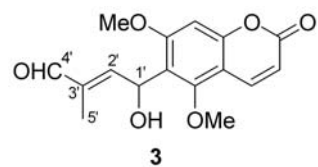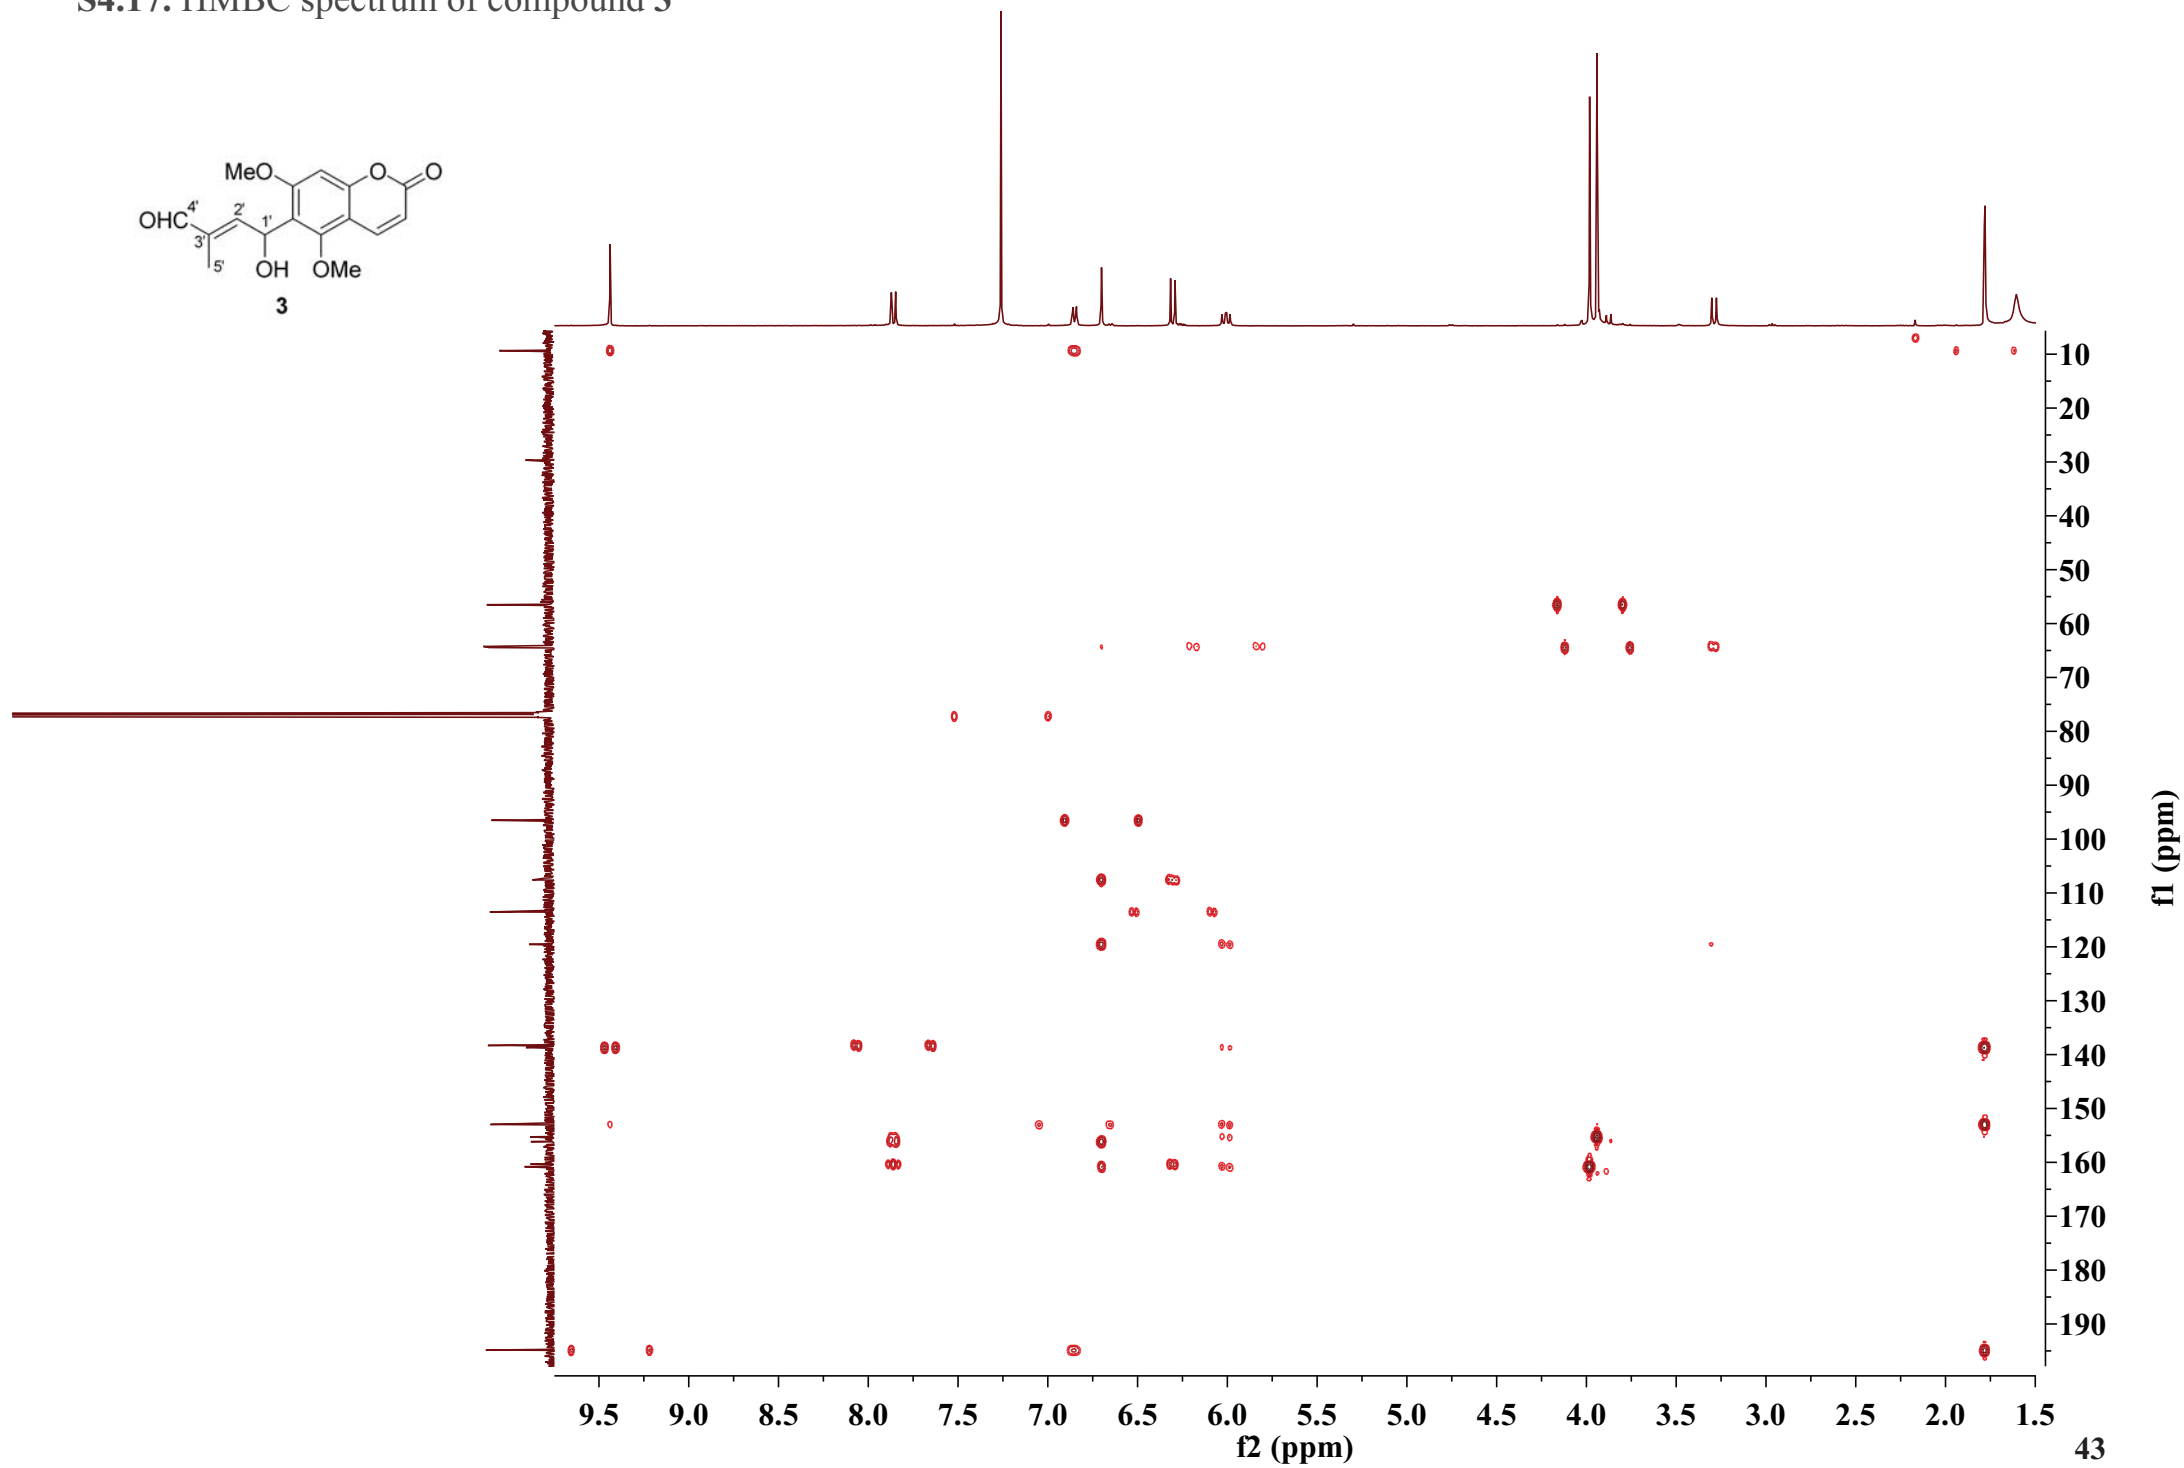

### S4.18. NOESY spectrum of compound 3

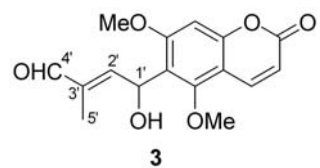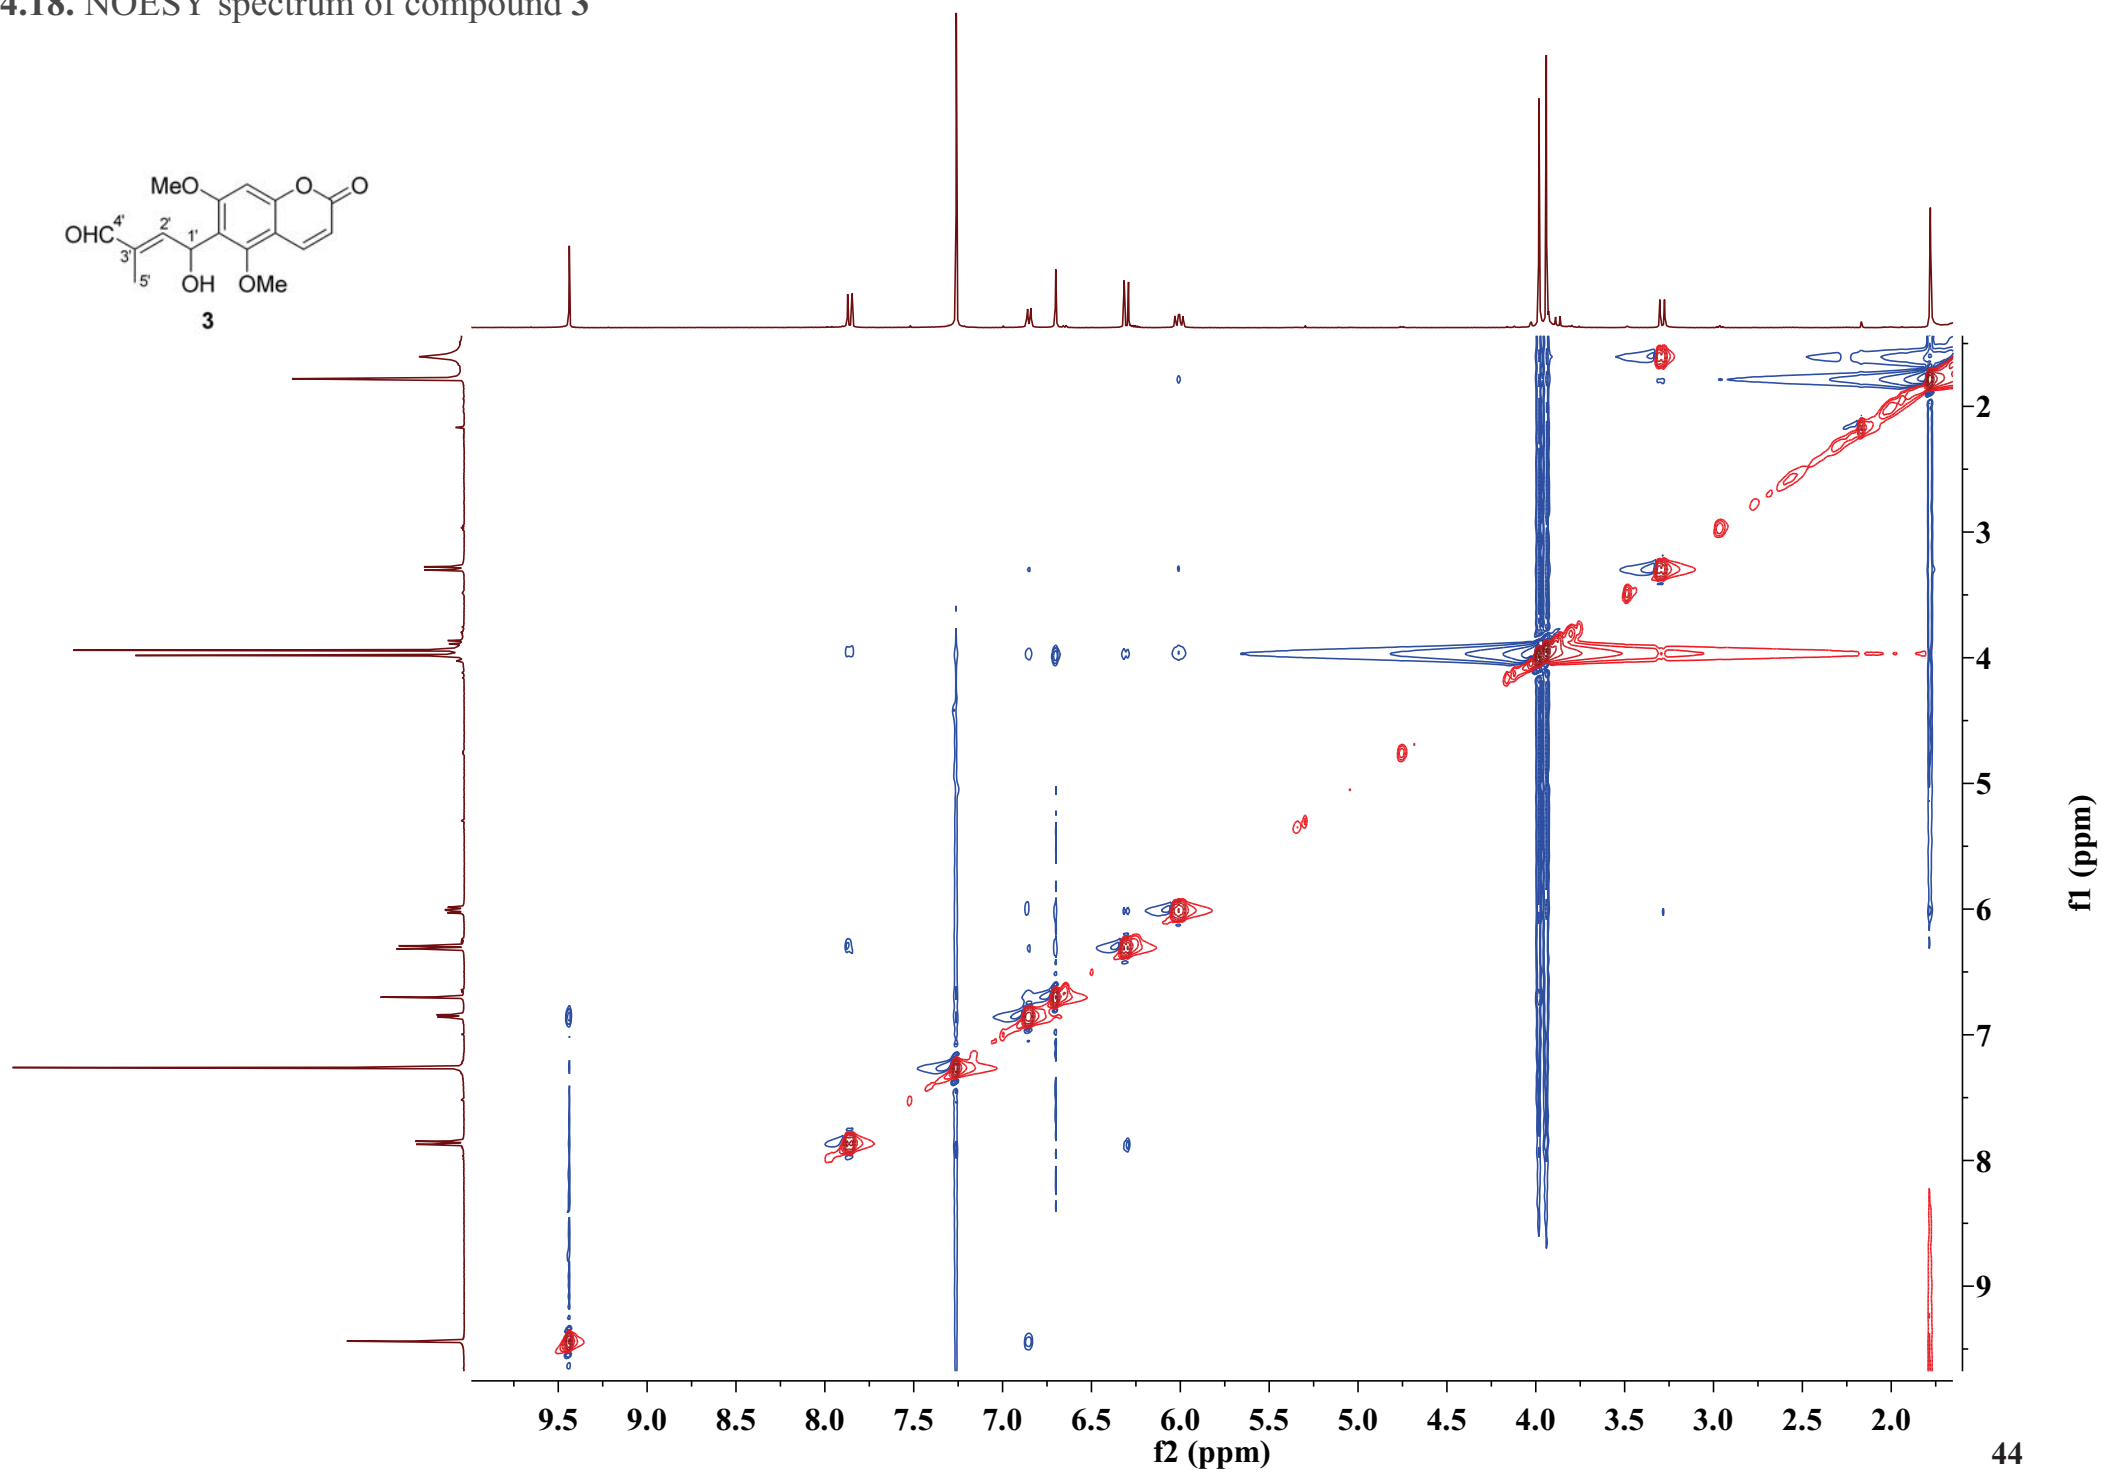

S4.19. <sup>1</sup>H NMR spectrum of compound 4

7.9150  
7.8910

6.6218  
6.5657

6.2524  
6.2283

3.8937  
3.7750

3.2407

1.3820

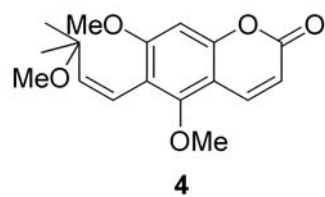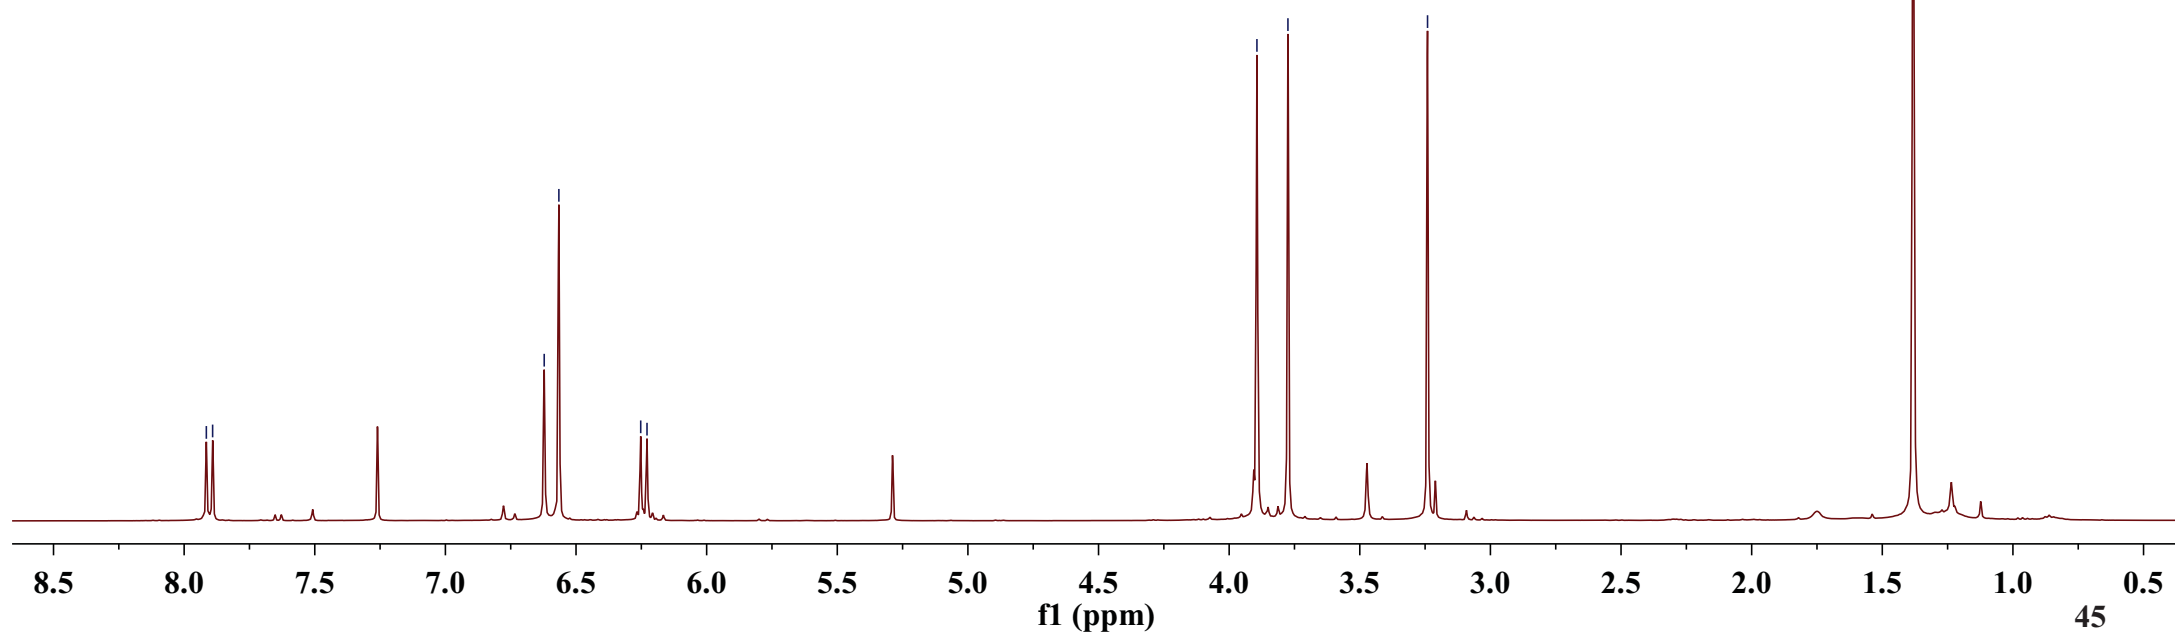

S4.20.  $^{13}\text{C}$  NMR and DEPT spectra of compound 4

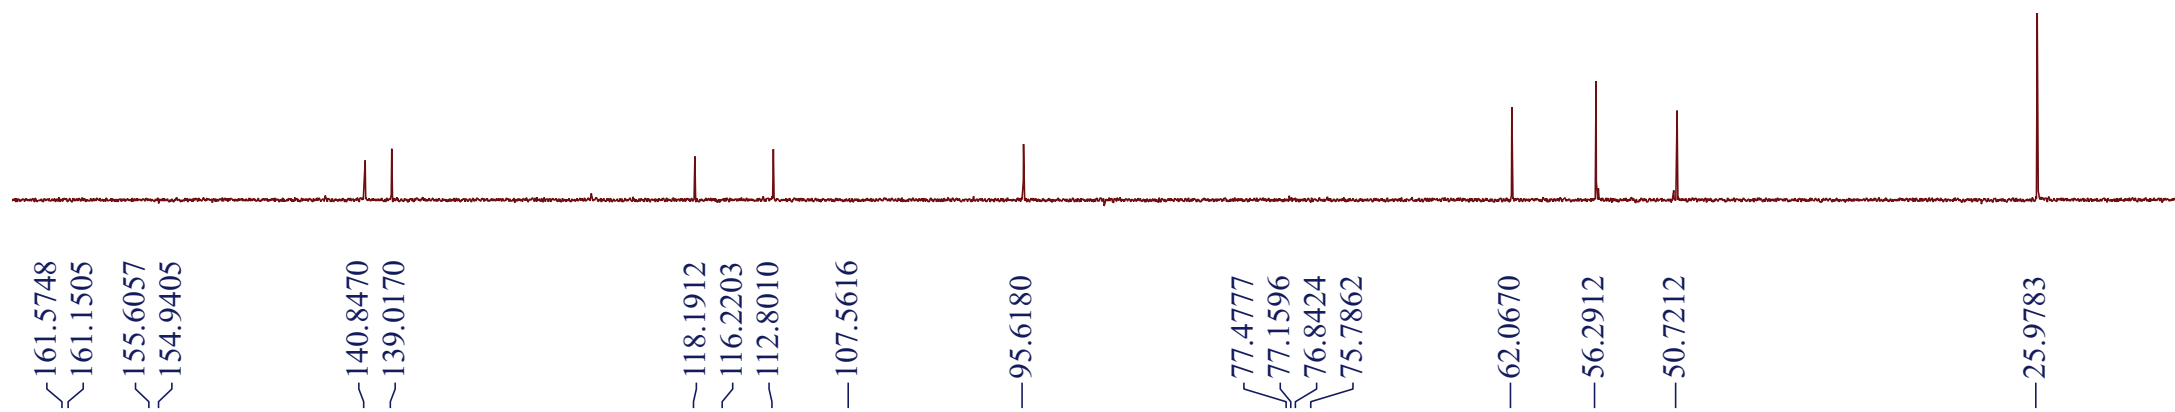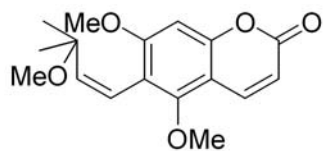

4

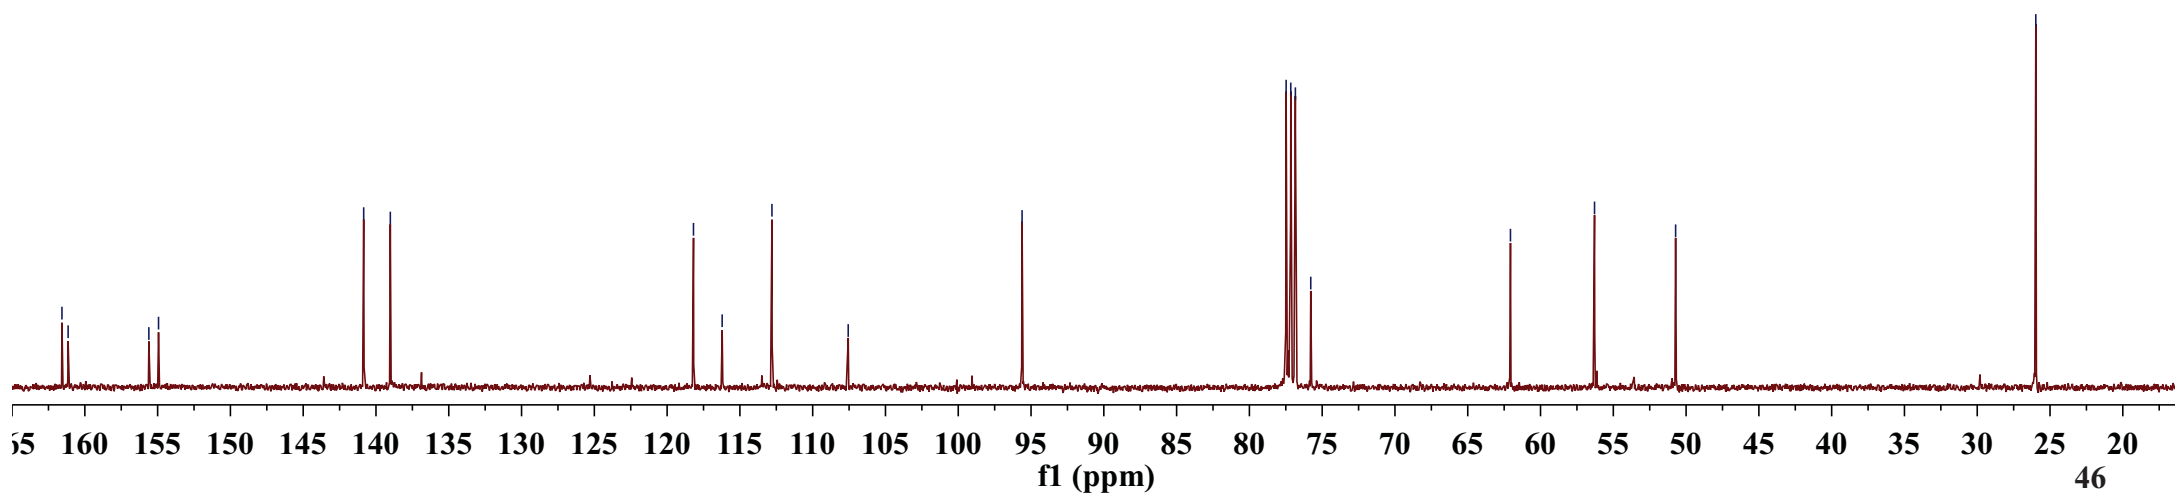

S4.21. HSQC spectrum of compound 4

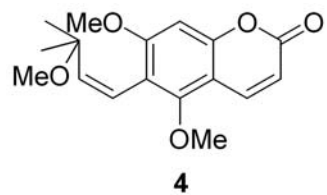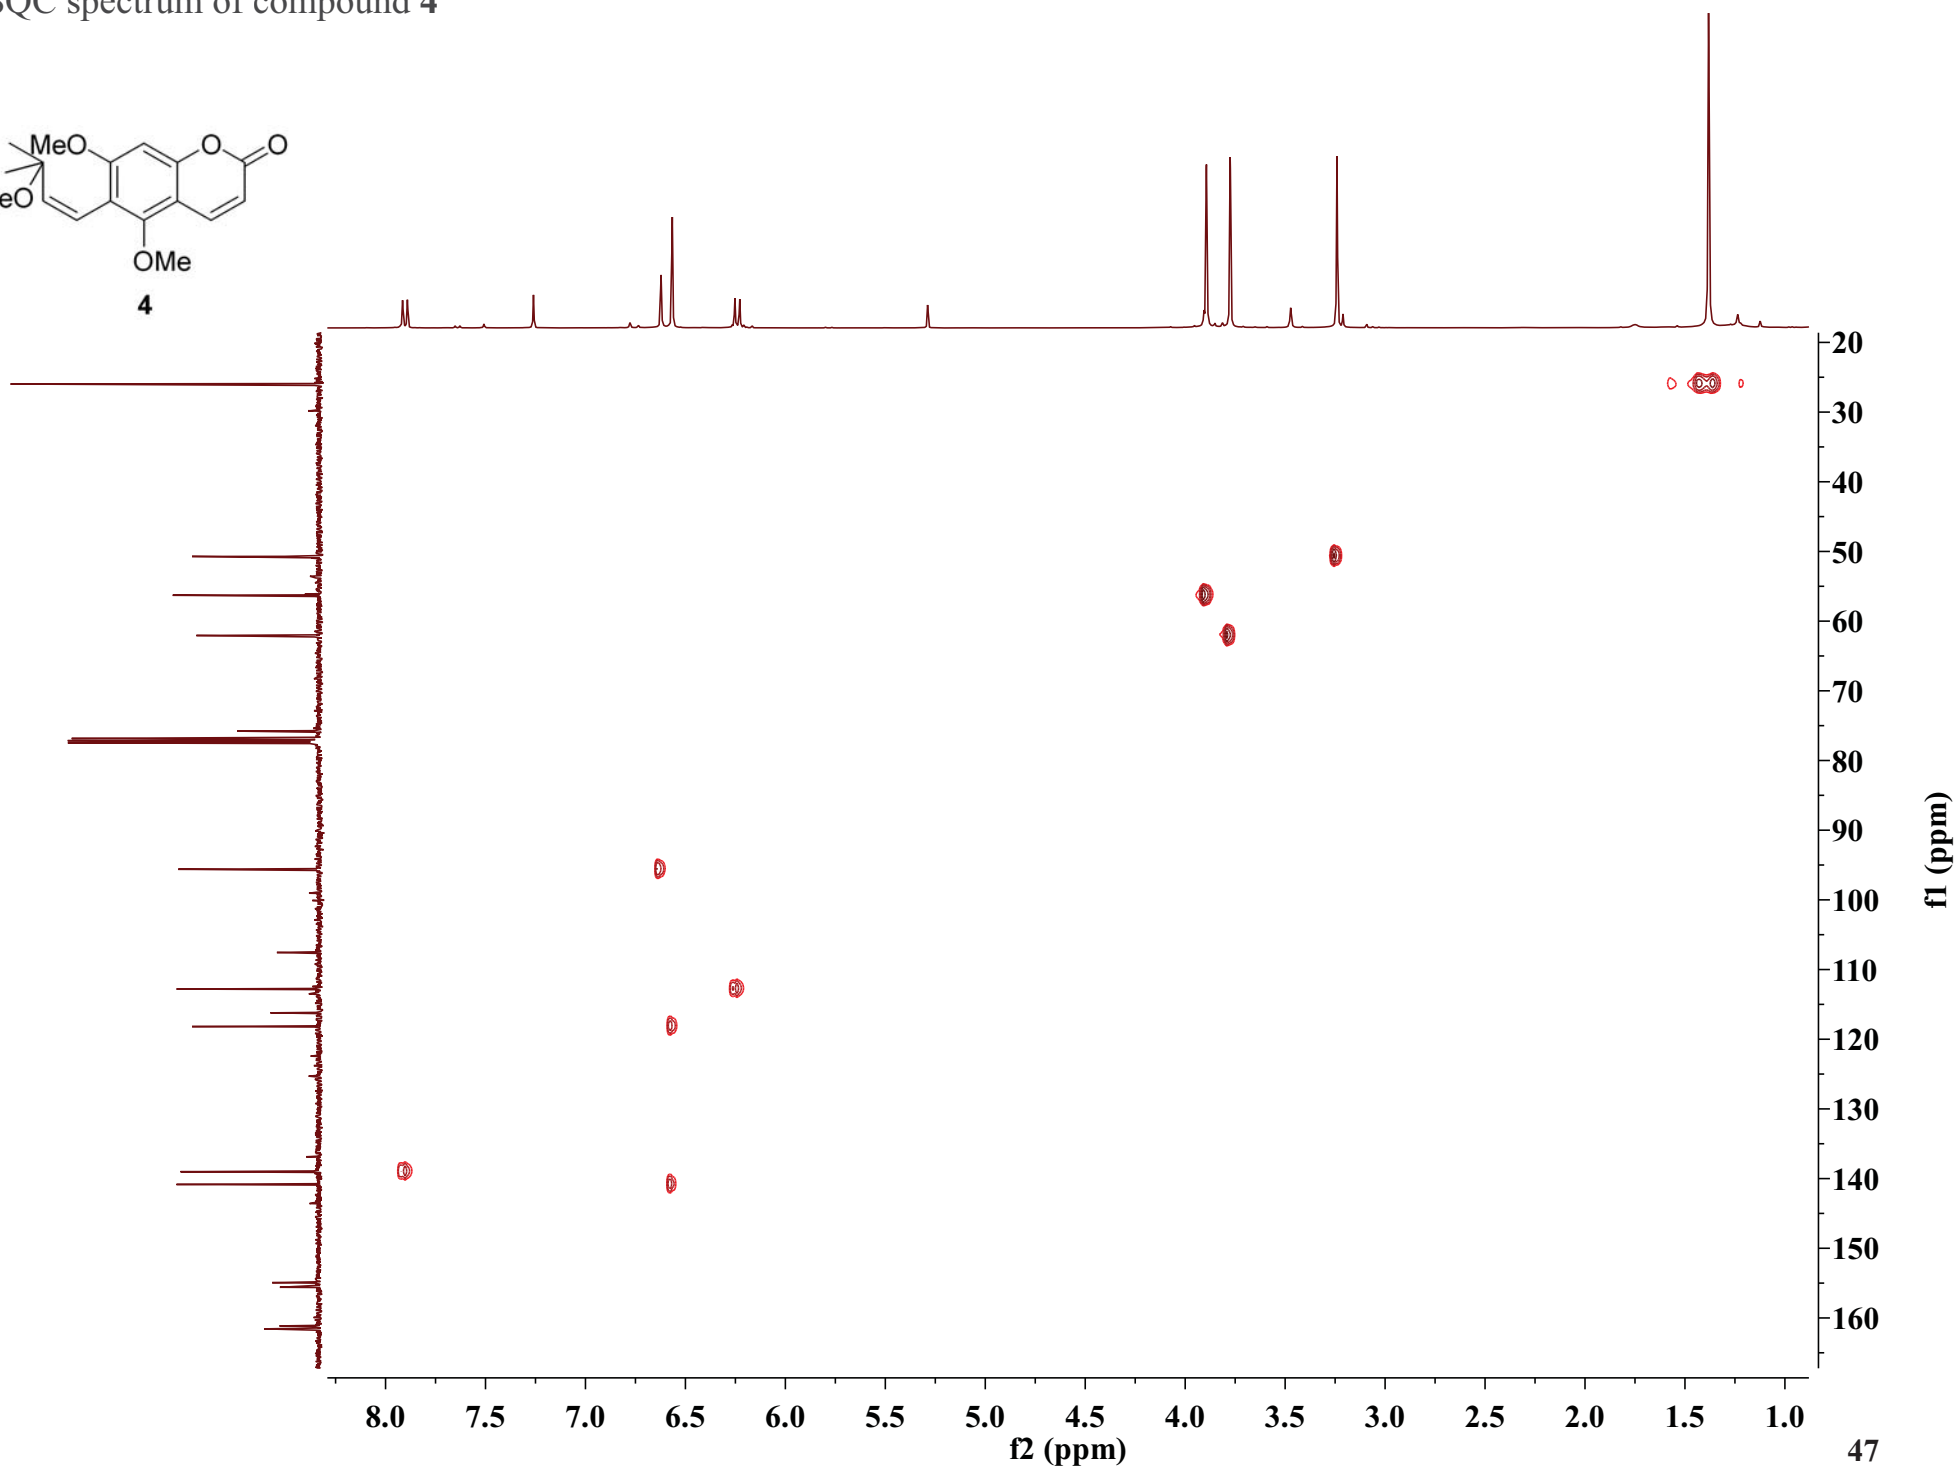





S4.23. <sup>1</sup>H NMR spectrum of compound 5

8.0264  
8.0021

7.2601

6.4065  
6.3058  
6.1745  
6.1504

5.4542  
5.4371  
5.4200  
5.0889  
5.0743  
5.0573

4.5546  
4.5381

3.5077

2.1115  
2.0910  
2.0747

1.7339  
1.6640  
1.5956

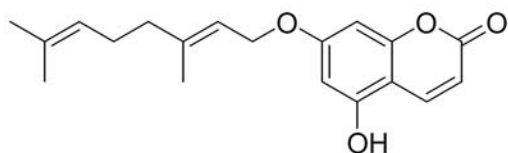

5

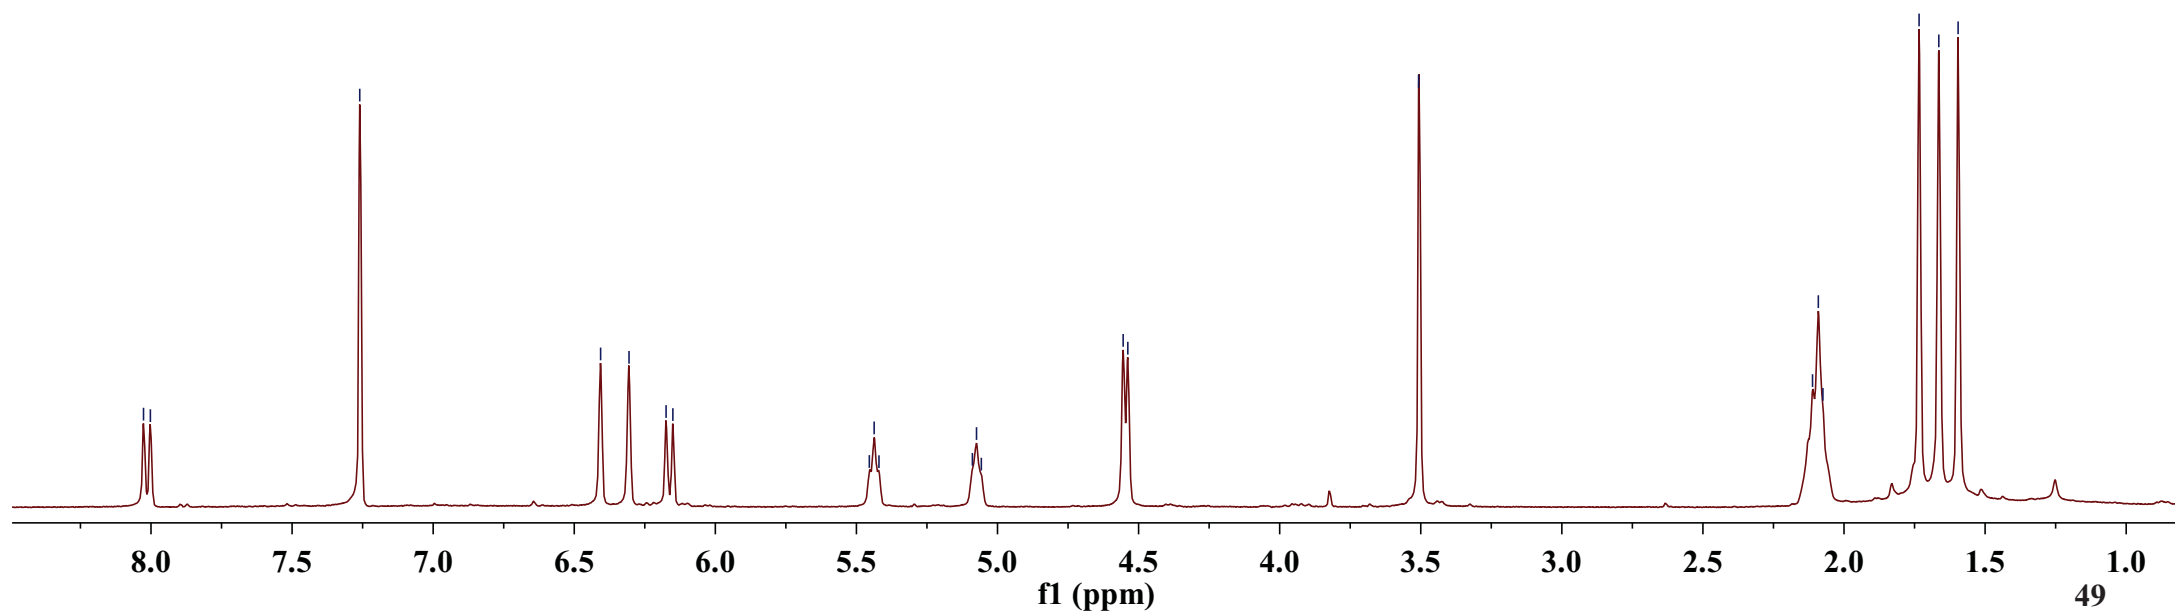

S4.24. <sup>13</sup>C NMR and DEPT spectra of compound 5

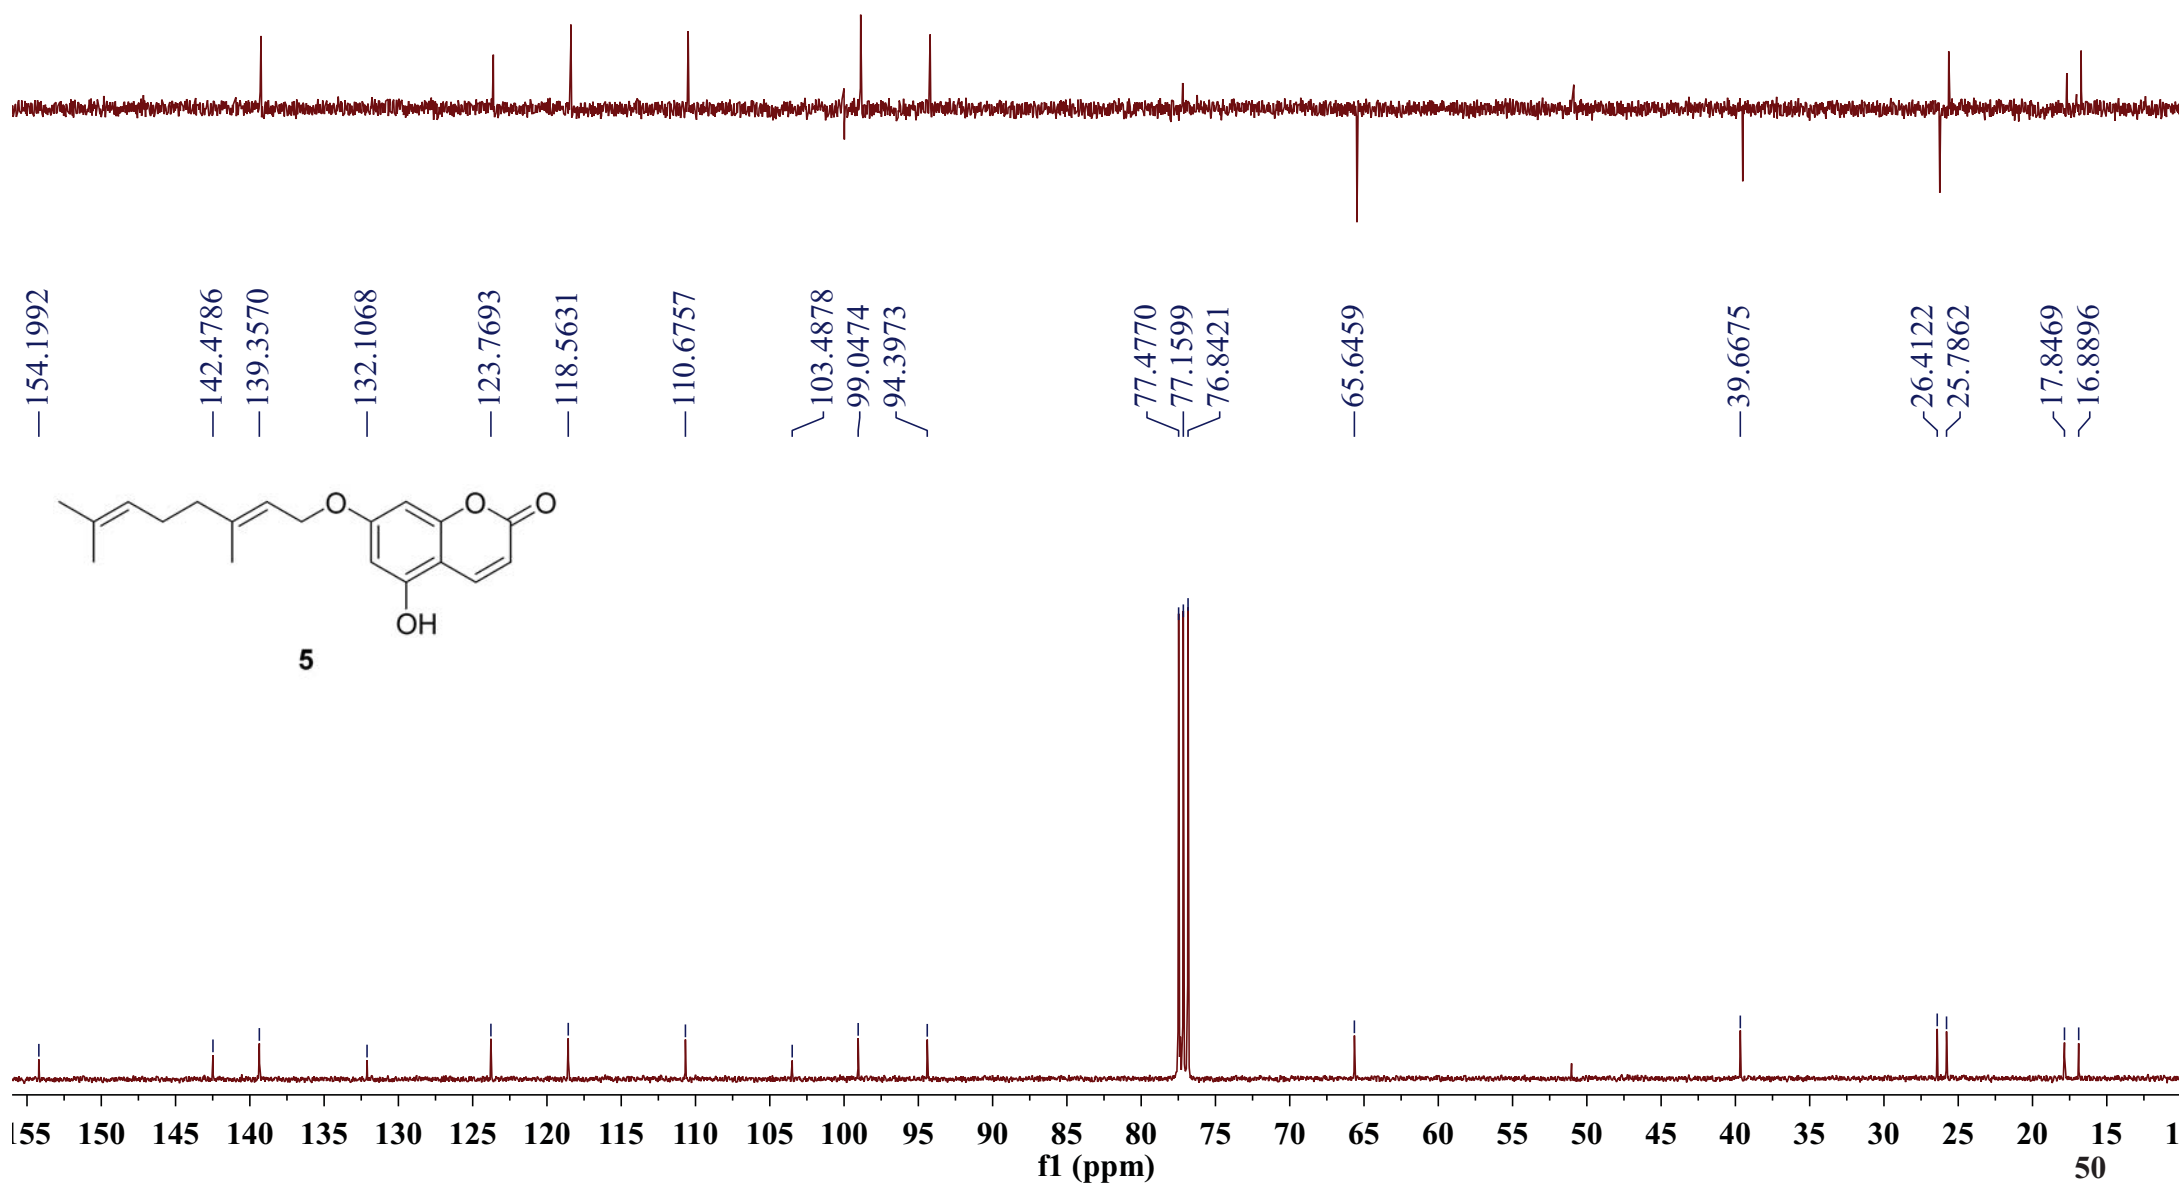

S4.25. HSQC spectrum of compound 5

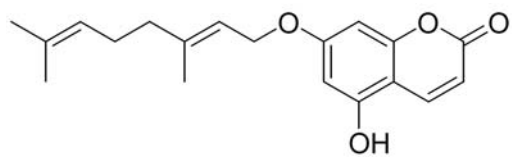

5

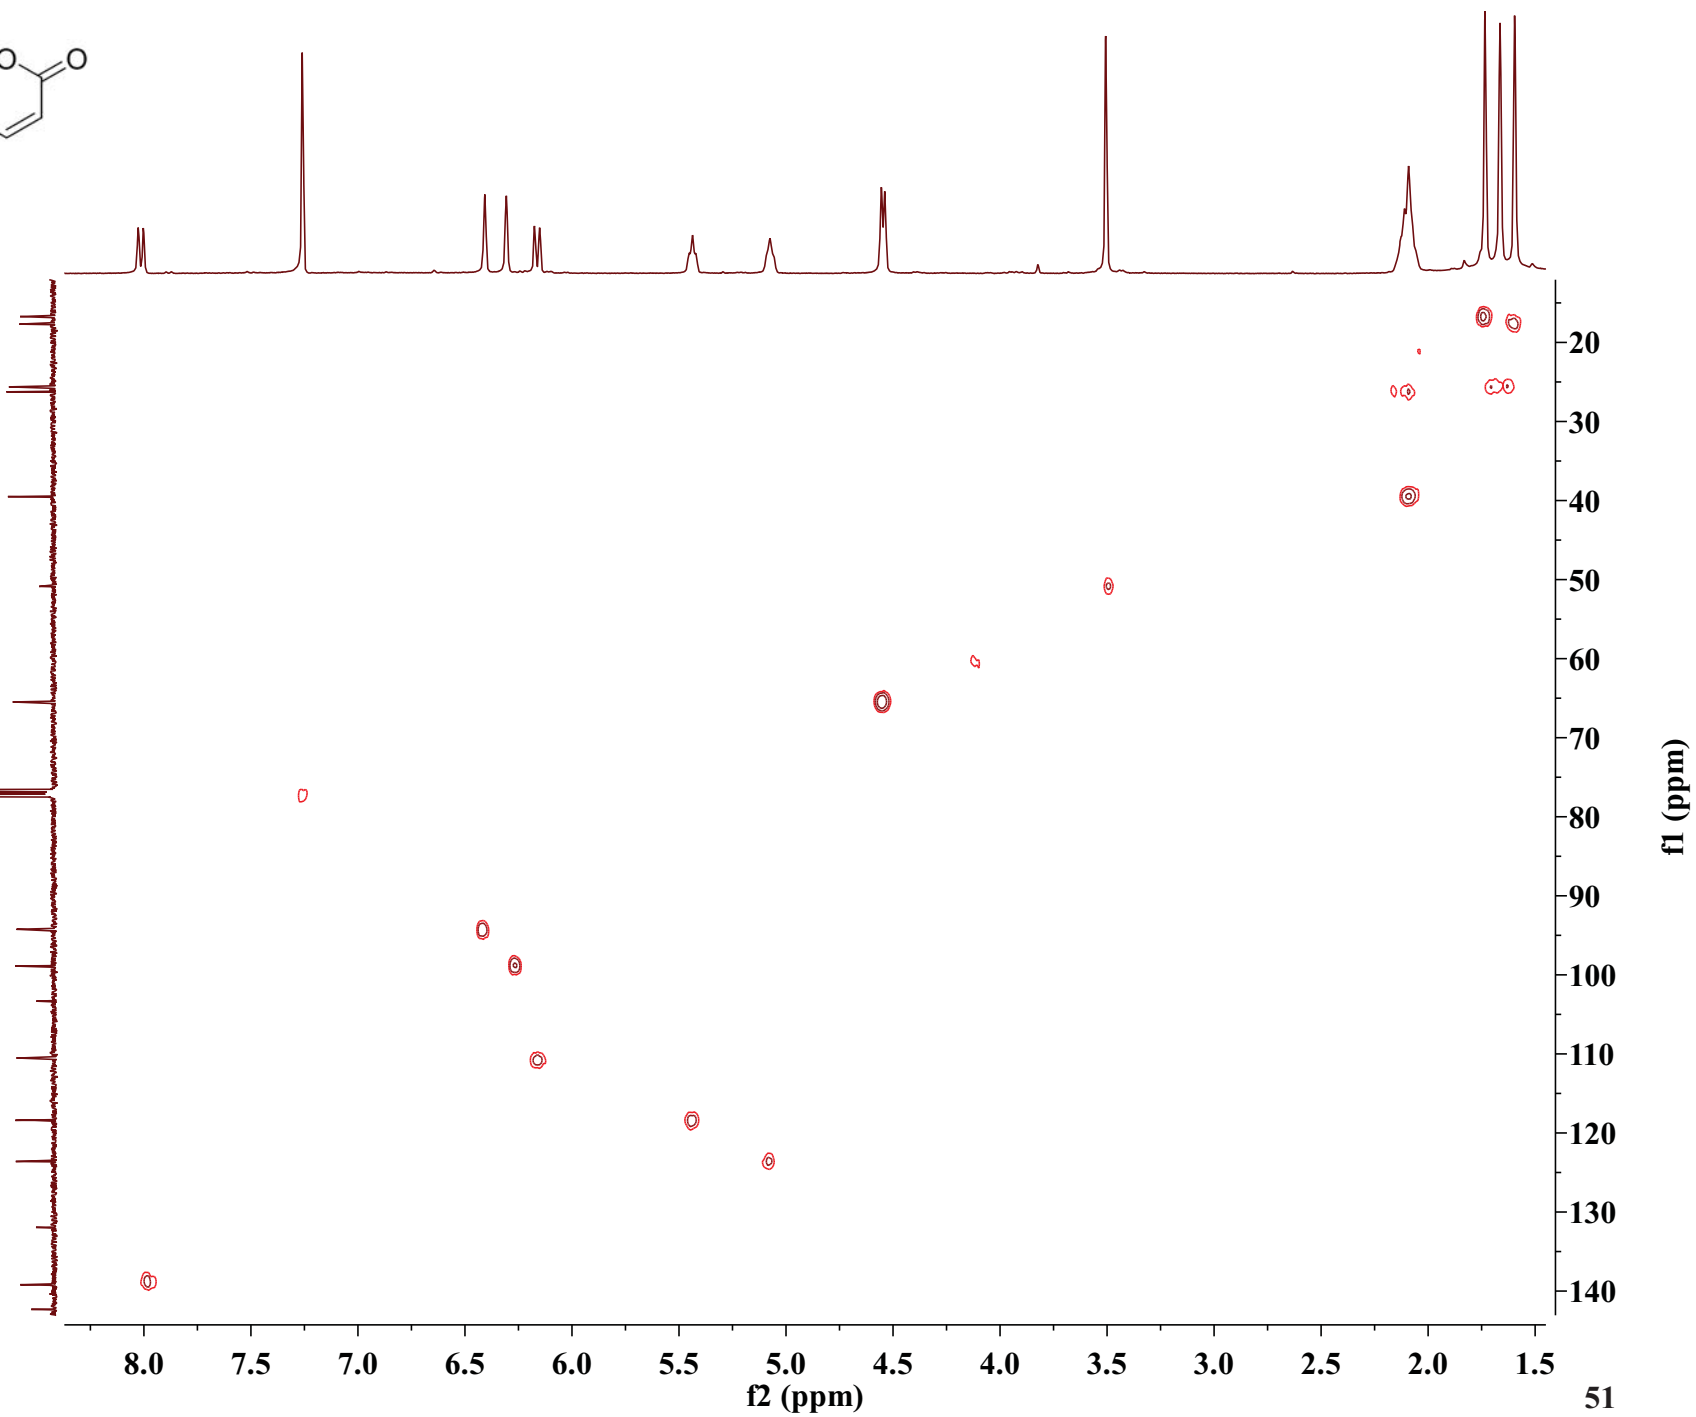

S4.26. HMBC spectrum of compound 5

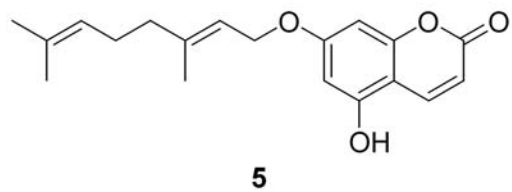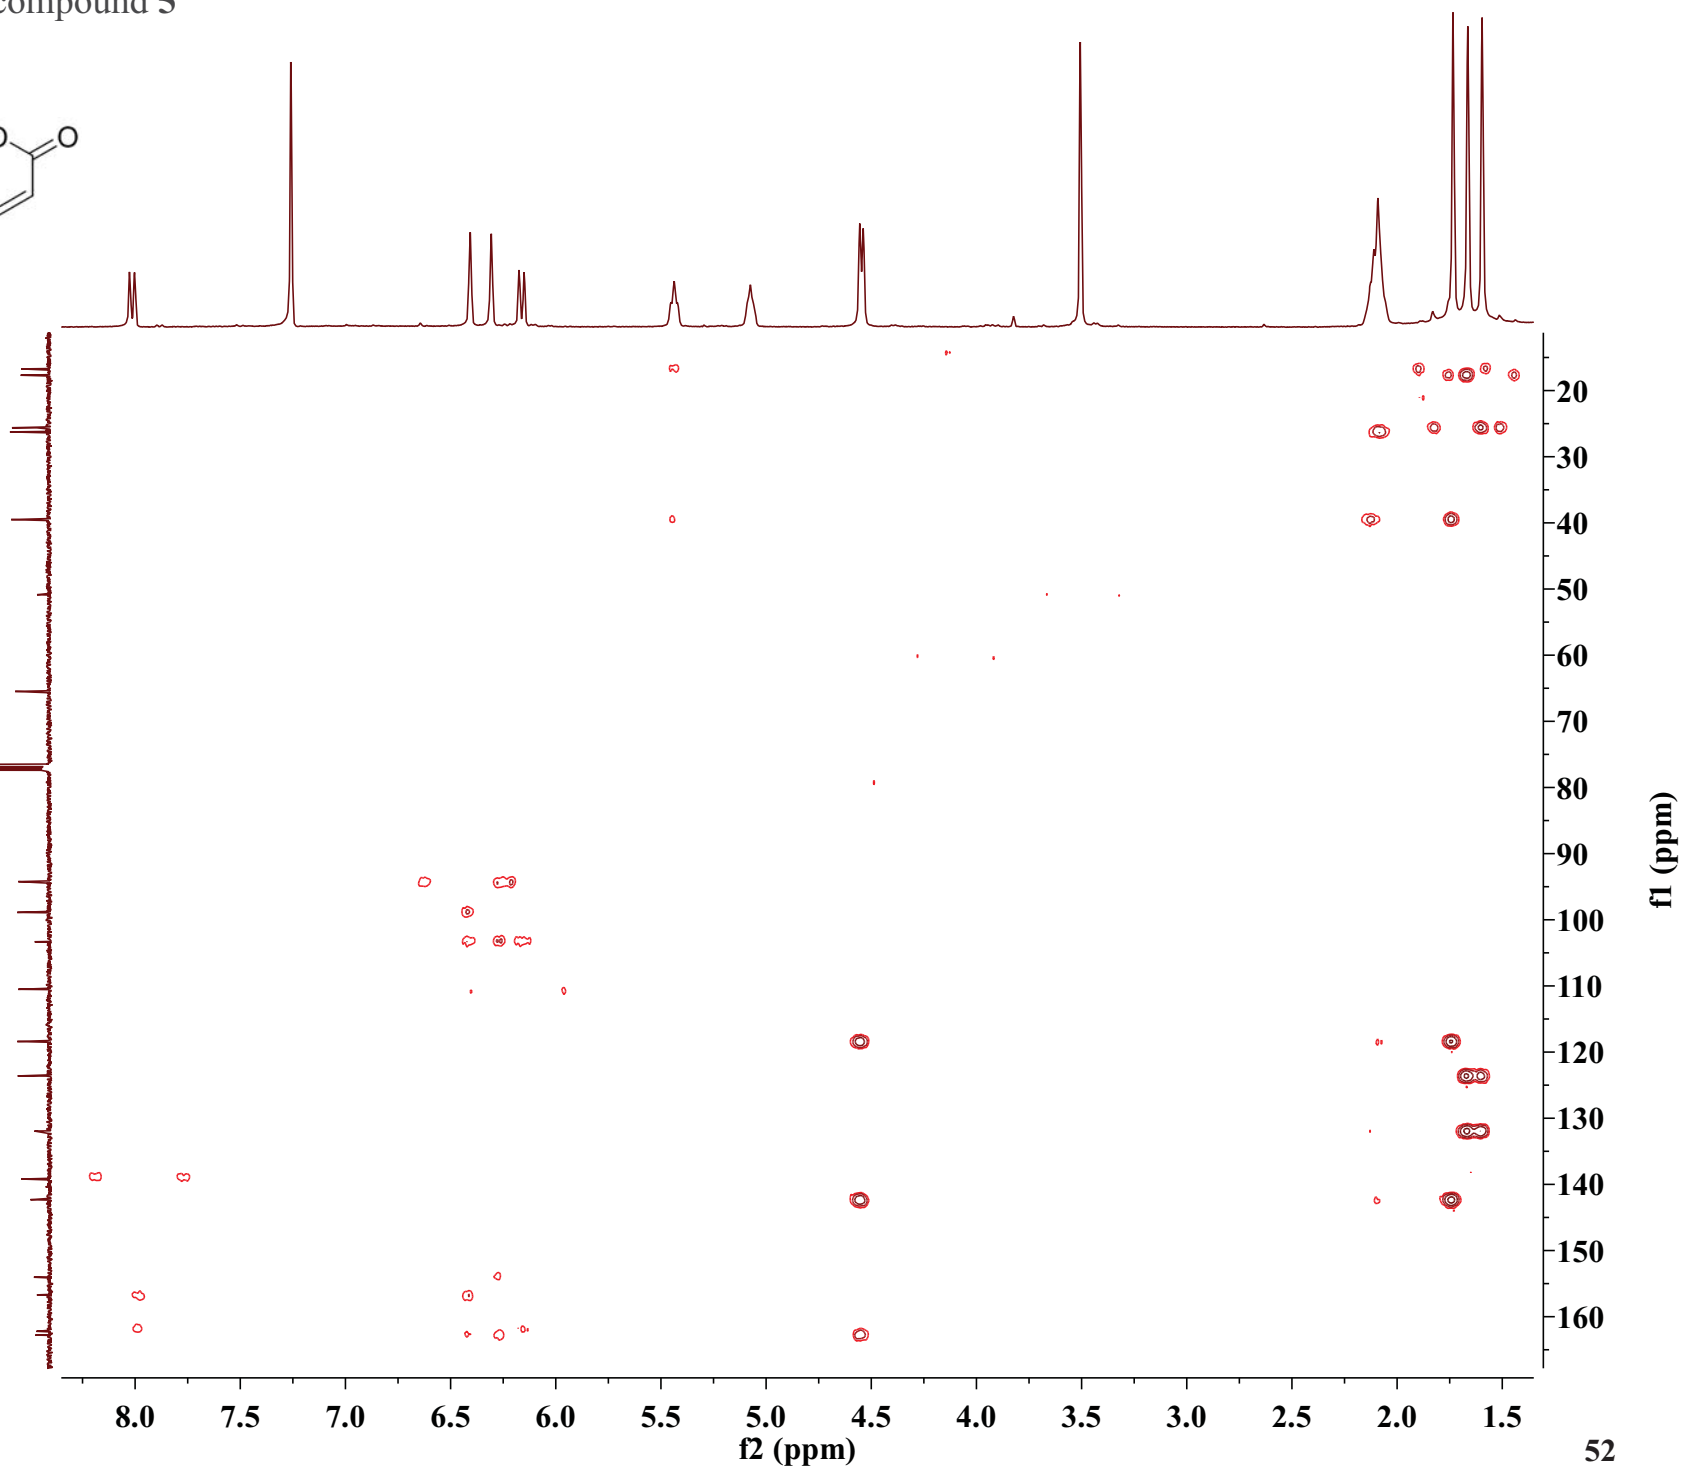

S4.27. <sup>1</sup>H NMR spectrum of compound **6**

7.8347  
7.8107  
7.2599  
6.5889  
6.2413  
6.2172  
5.3823  
5.3606  
5.3419  
5.3270  
5.3071  
5.2141  
5.2061  
5.1885  
5.1811  
5.1745  
3.8940  
3.8471  
3.0841  
3.0781  
3.0557  
2.9172  
2.9090  
2.8830  
2.8755  
2.7722  
2.7560  
2.7400  
2.1247  
2.1062  
2.1010  
2.0874  
2.0656  
2.0598  
2.0478  
2.0407  
2.0245  
2.0069  
2.0016  
1.9895  
1.9829  
1.9109  
1.3657  
1.3487  
1.3301  
1.3114  
1.3059  
1.2922  
1.2843  
1.2765  
1.2642  
1.2583  
1.1977  
1.1927  
1.1802  
1.1631  
0.8803  
0.8749  
0.8624

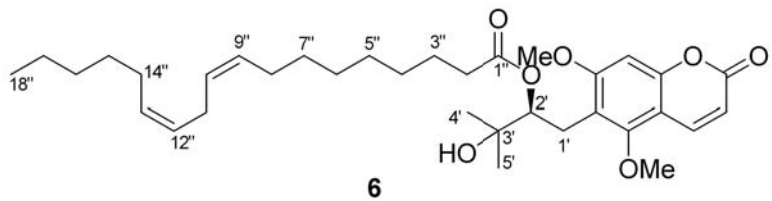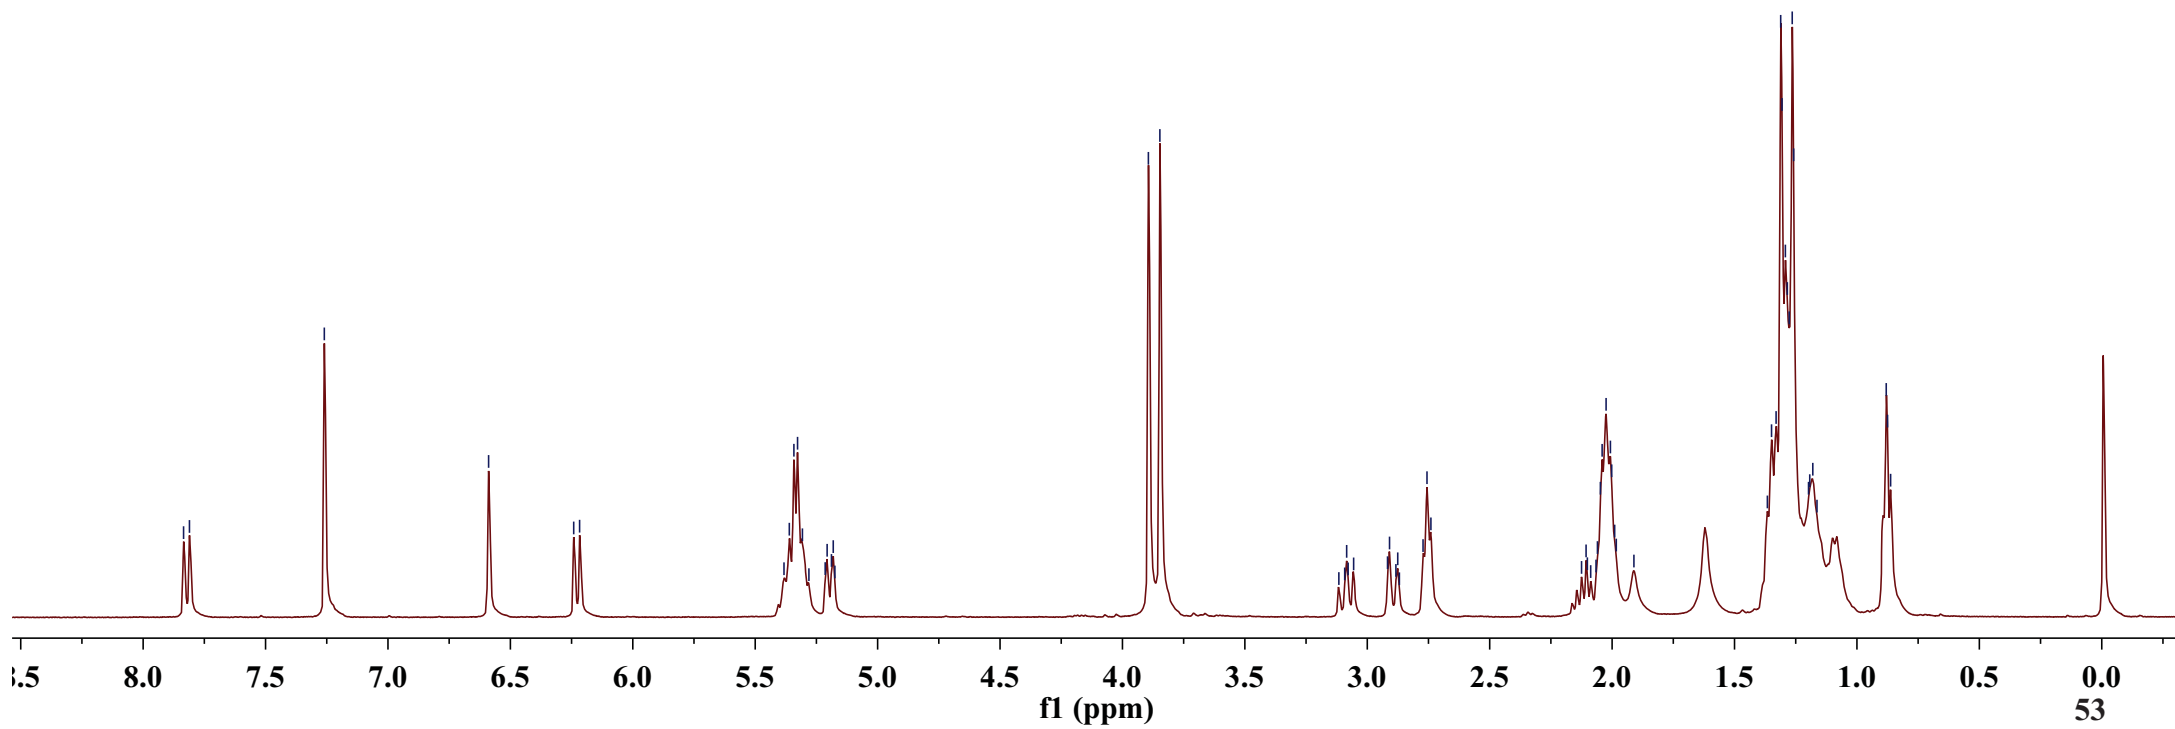

S4.28.  $^{13}\text{C}$  NMR and DEPT spectra of compound **6**

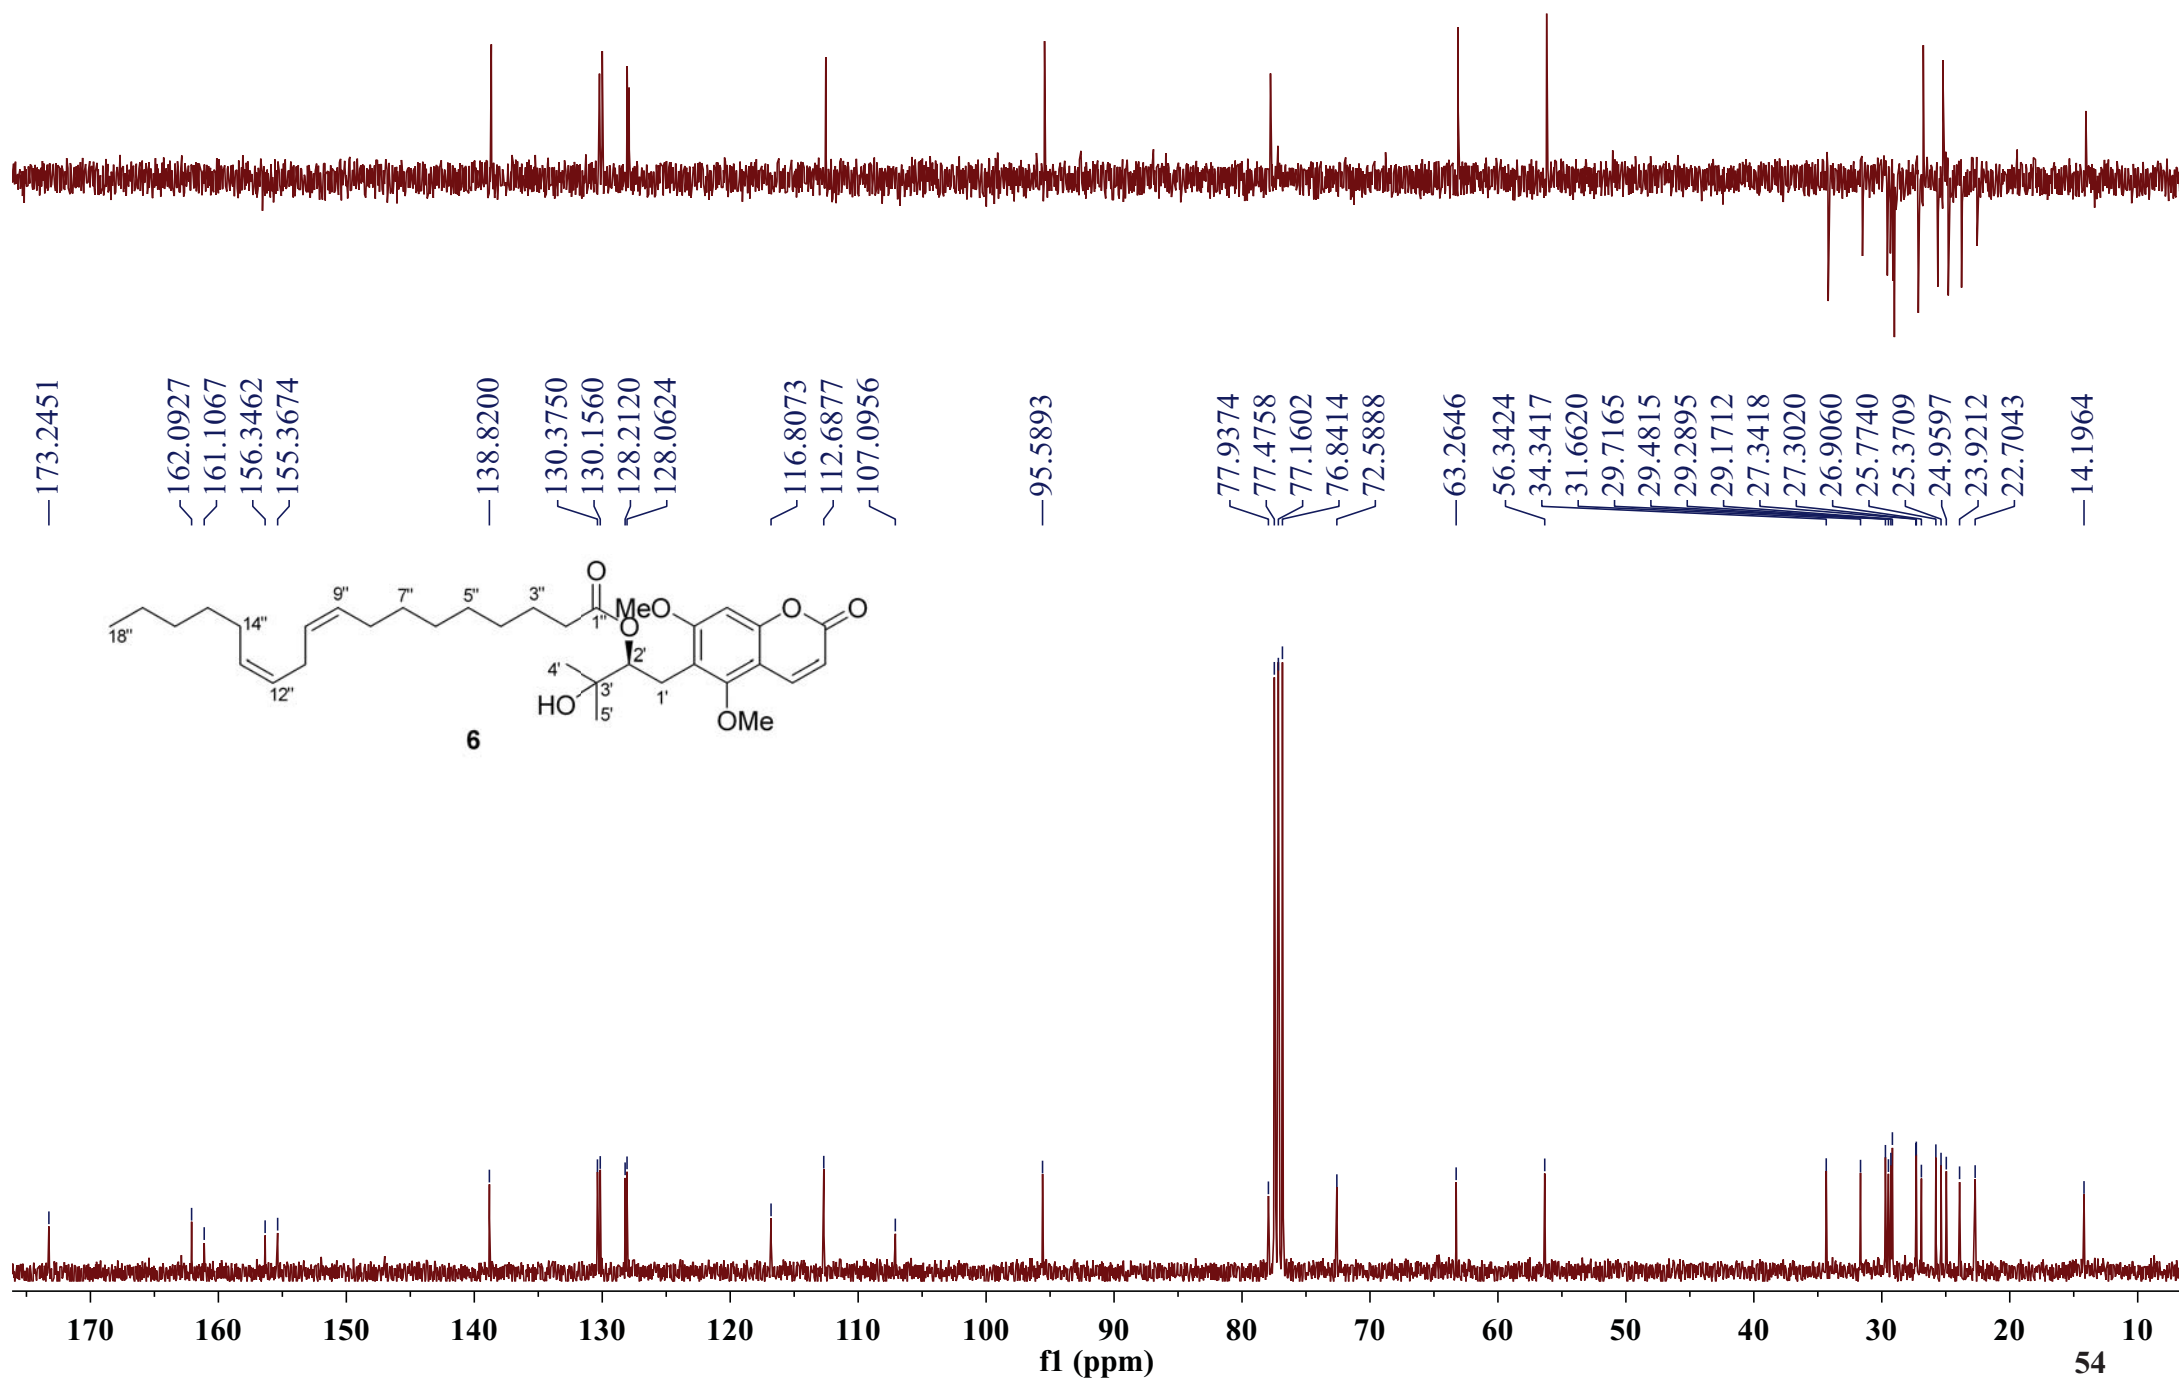

### S4.29. HSQC spectrum of compound 6

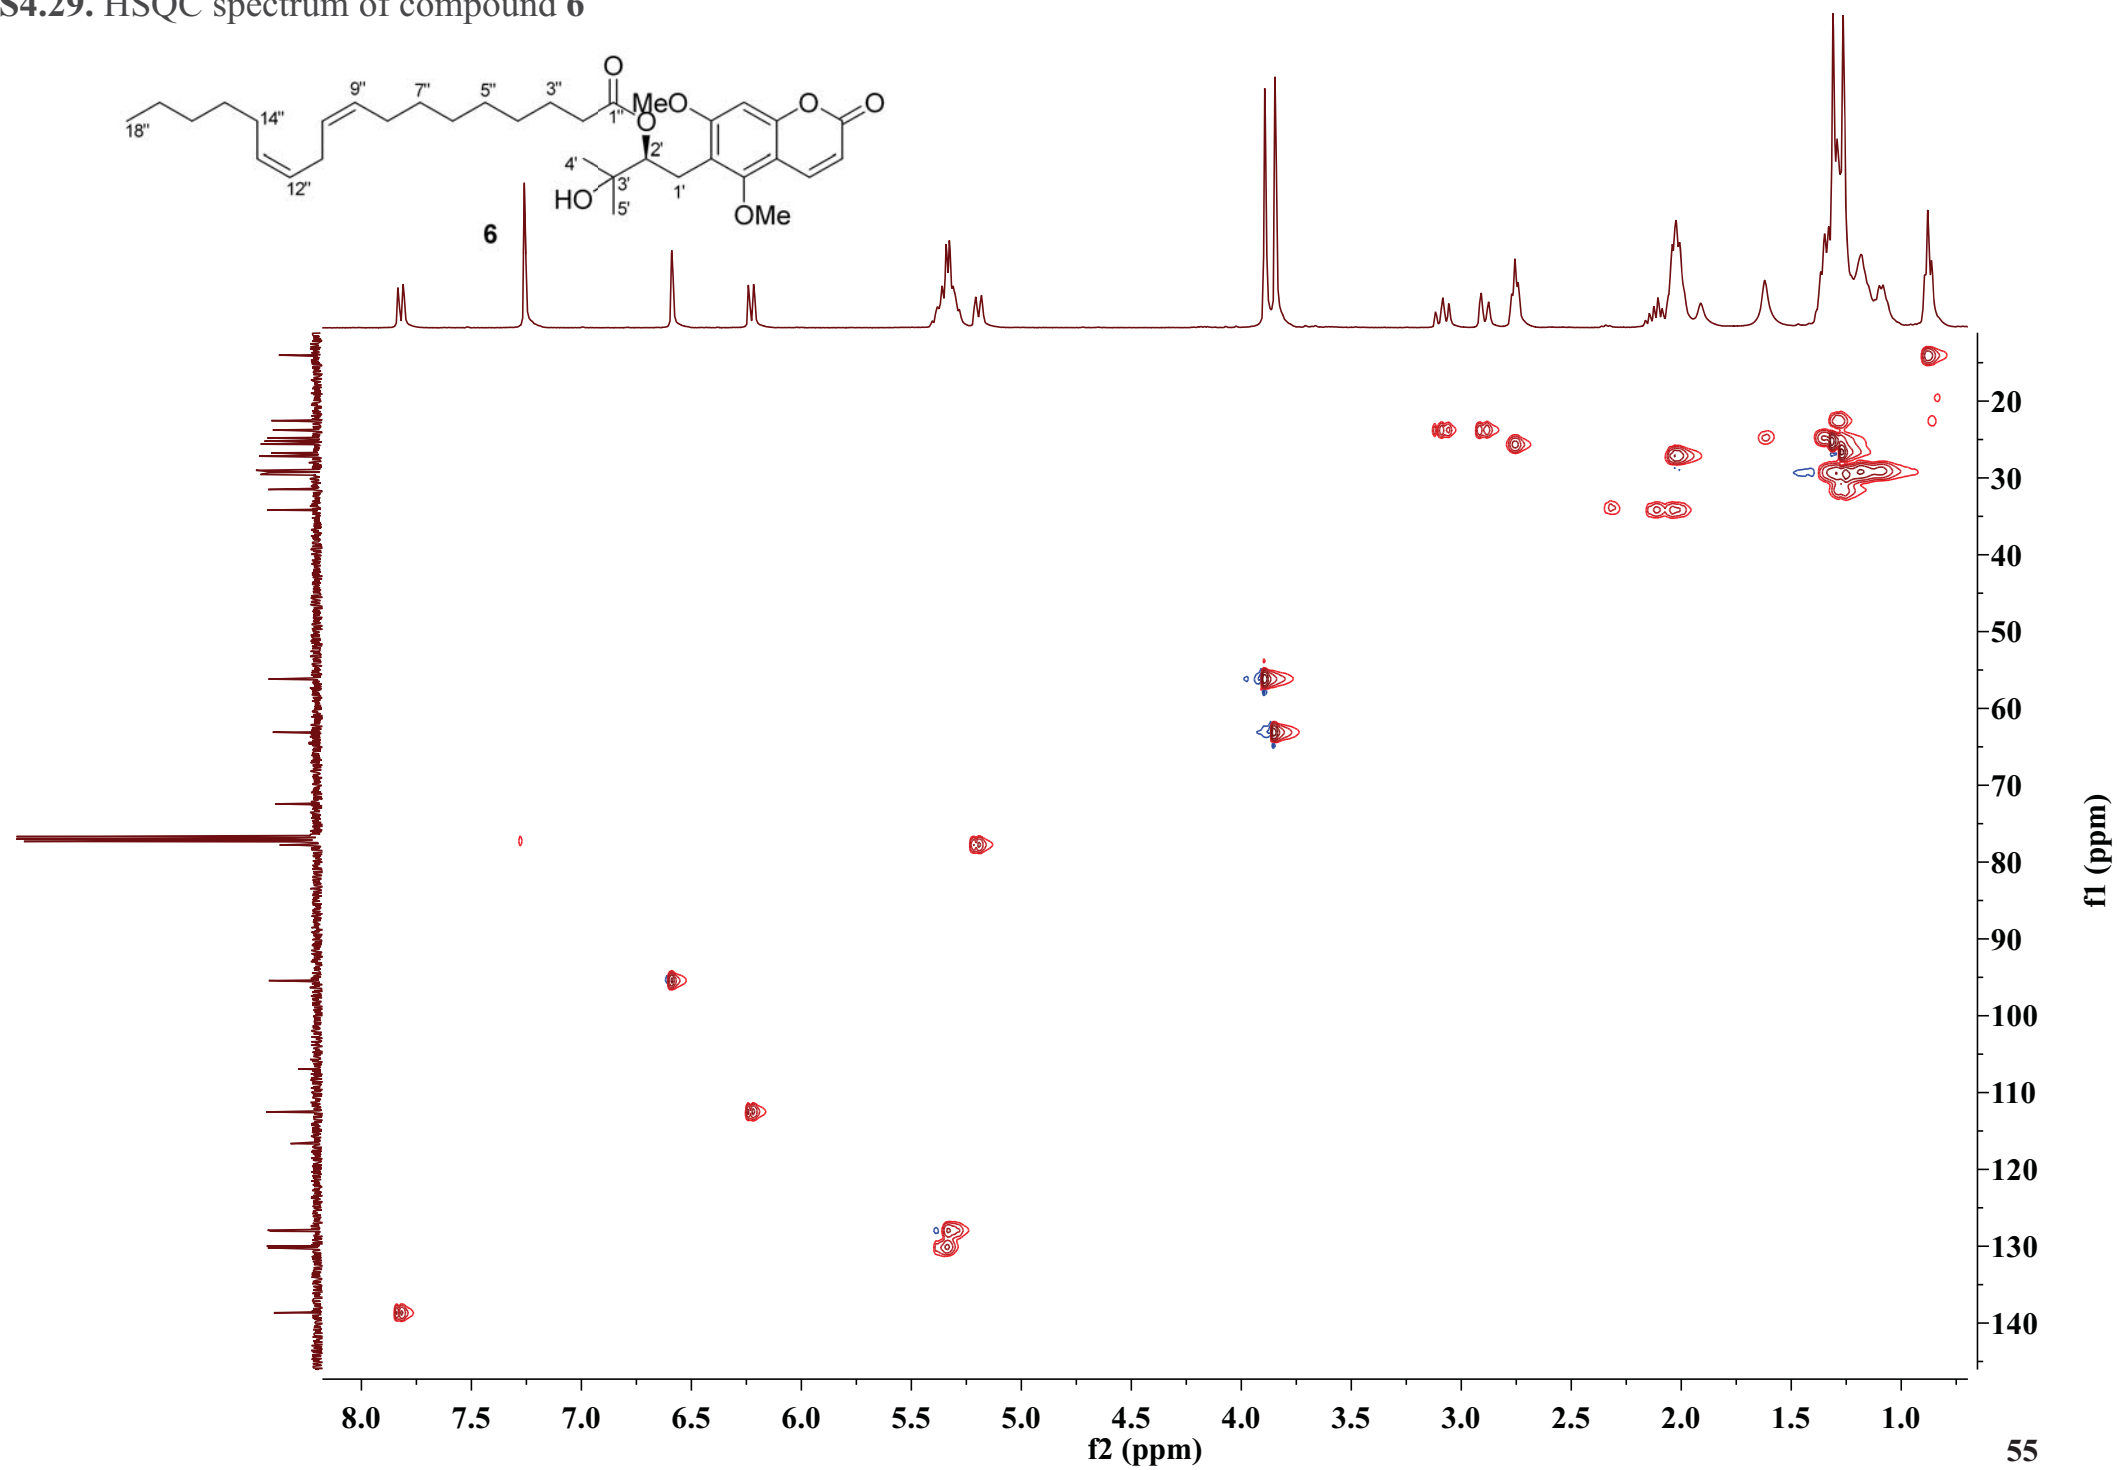

### S4.30. HMBC spectrum of compound 6

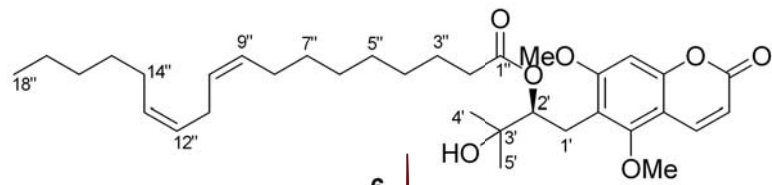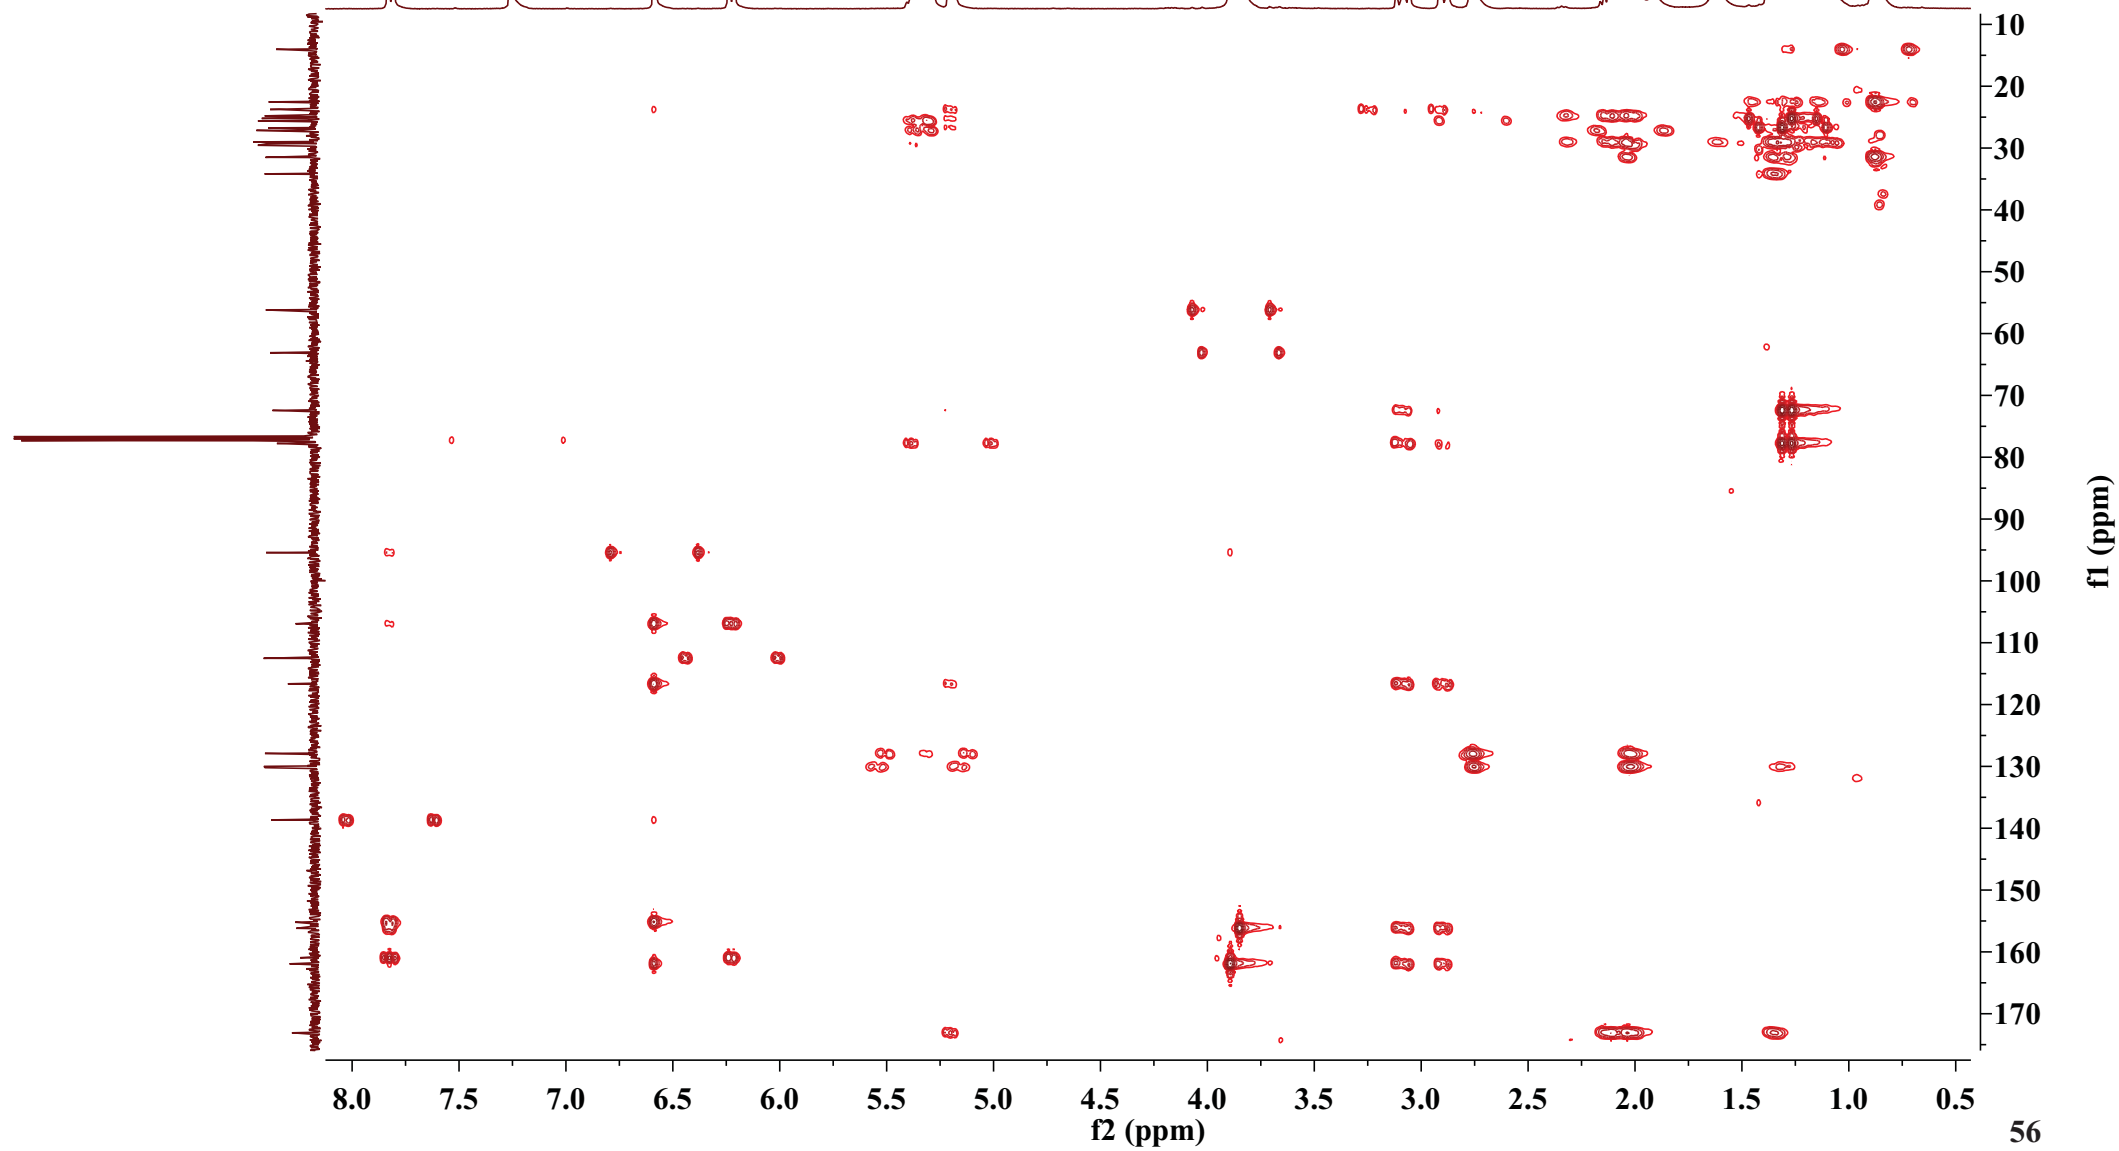



S4.31. <sup>1</sup>H NMR spectrum of compound 7

7.9859  
7.9640

7.5128  
7.4908  
7.4827

6.8833  
6.8623  
6.8411

4.8681

3.9066

3.3186  
3.3145  
3.3104  
3.3063  
3.3021

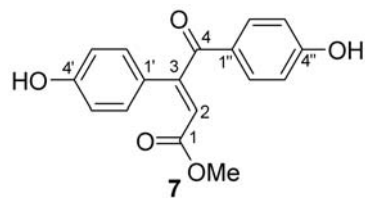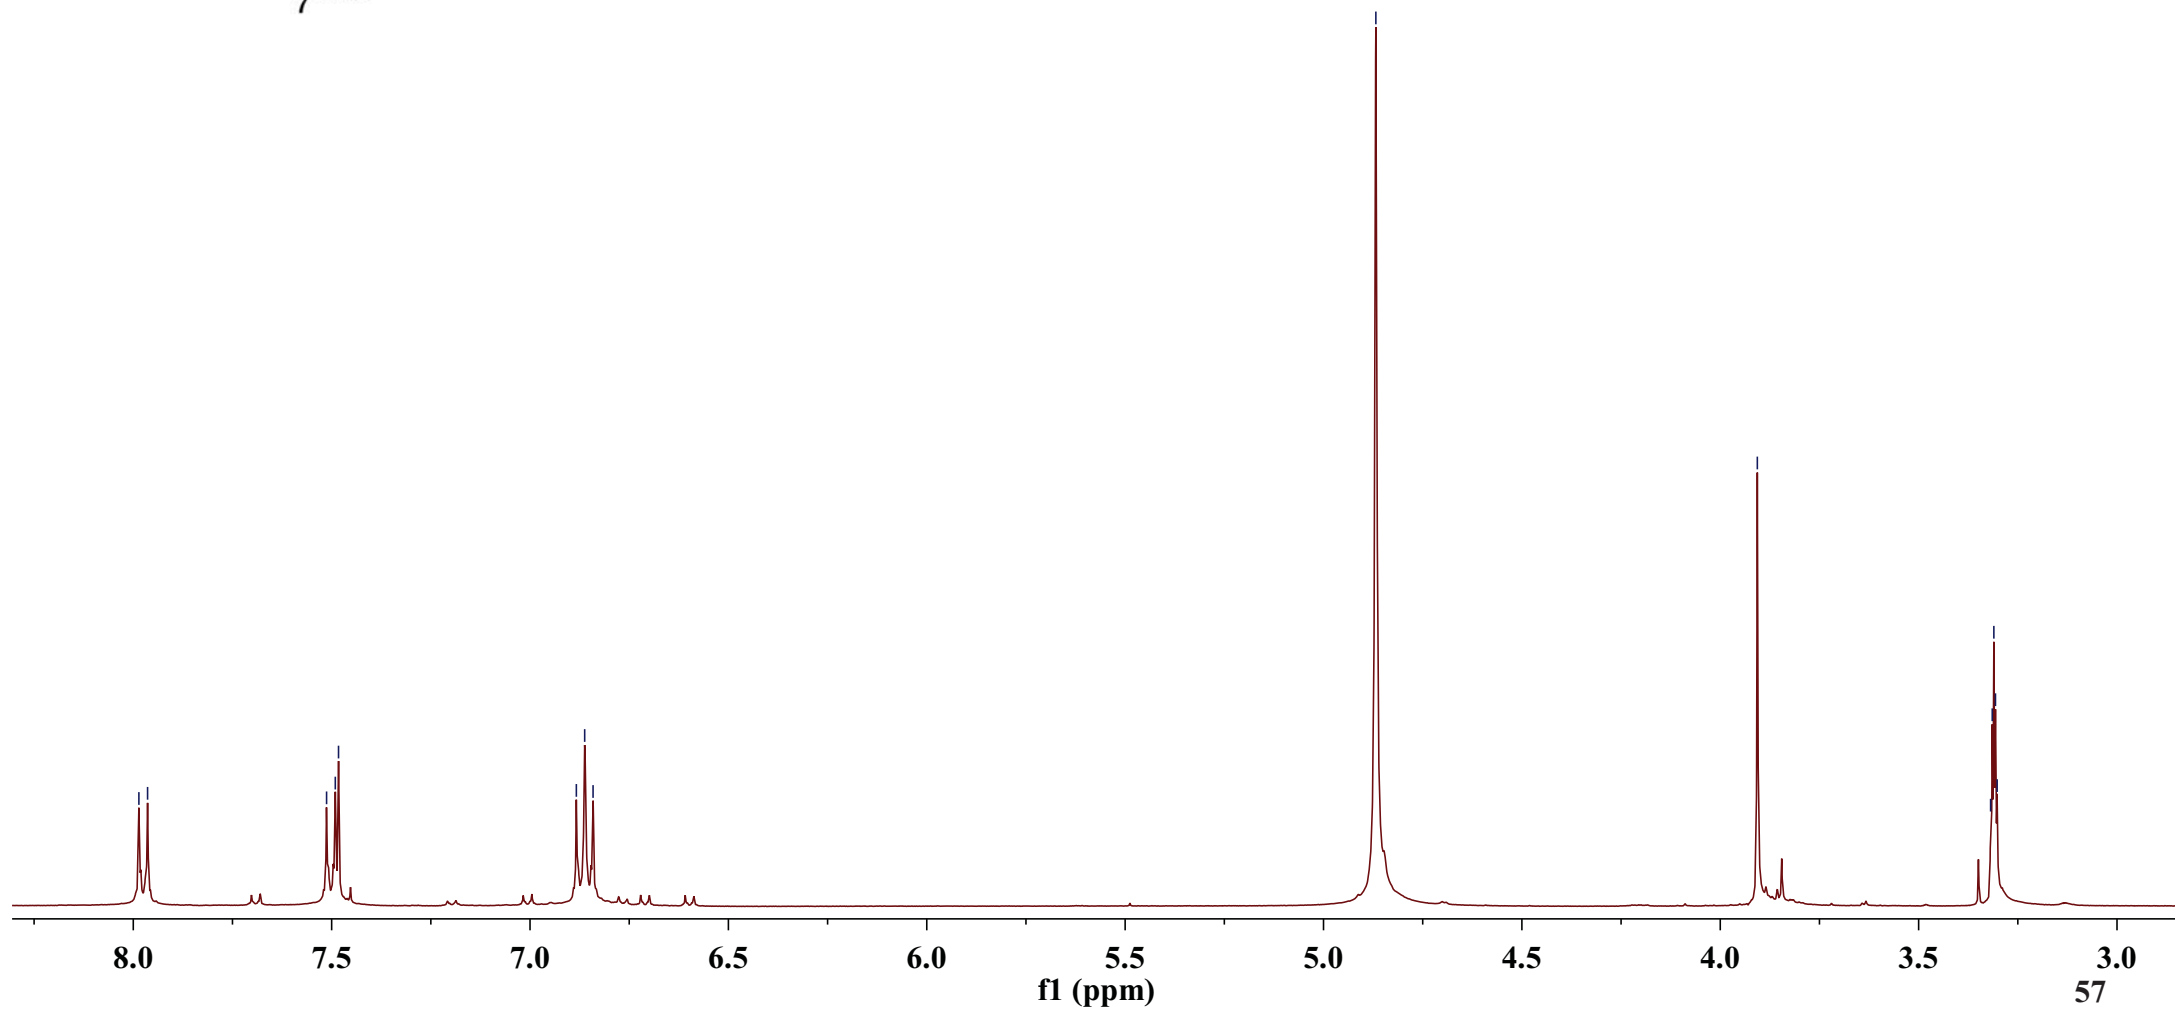

S4.32.  $^{13}\text{C}$  NMR and DEPT spectra of compound 7

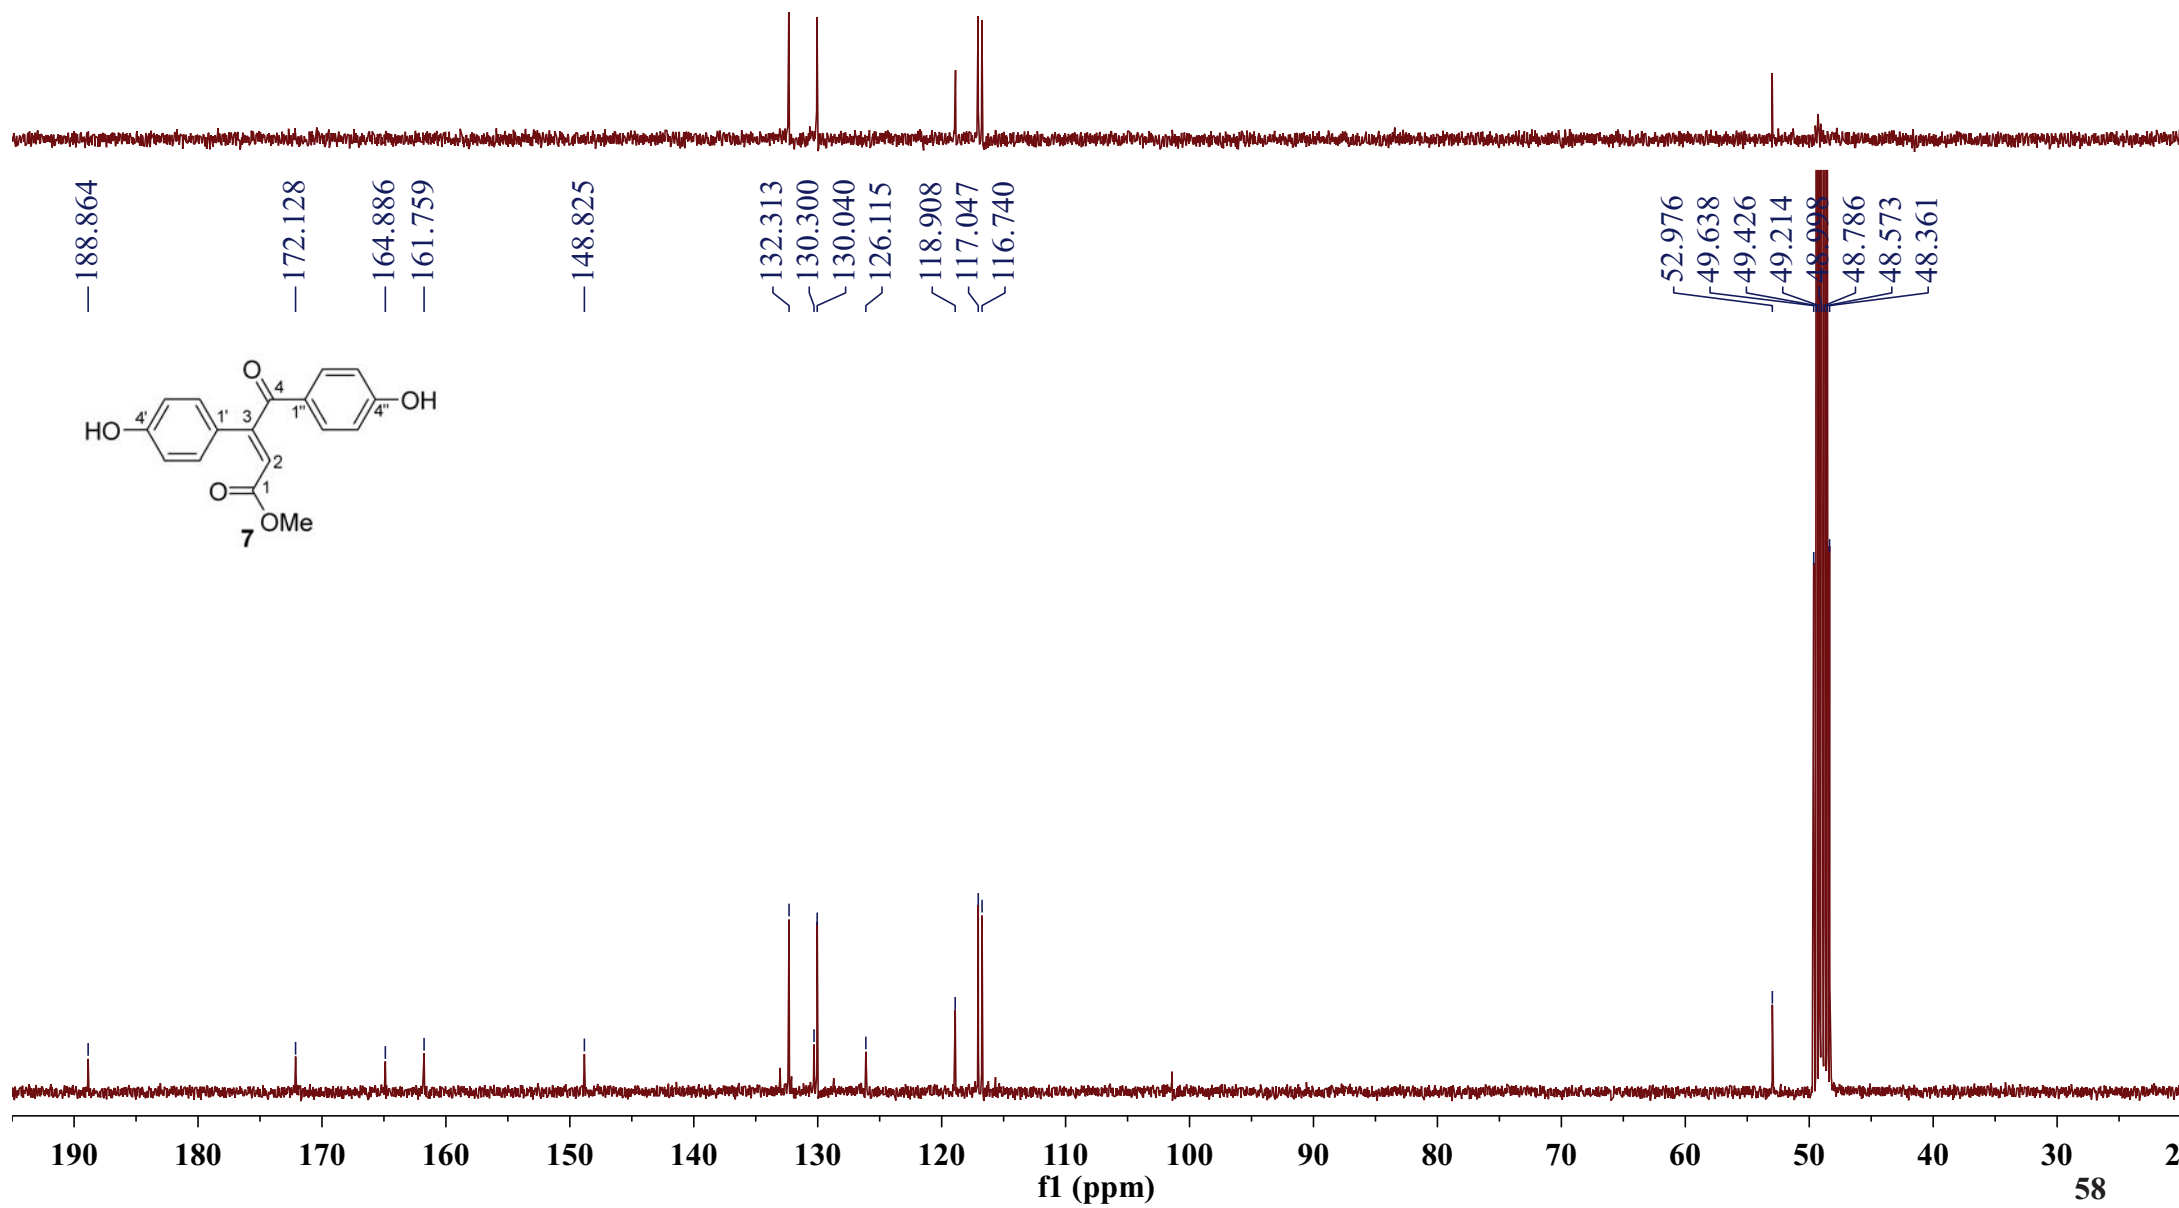

S4.33. HSQC spectrum of compound 7

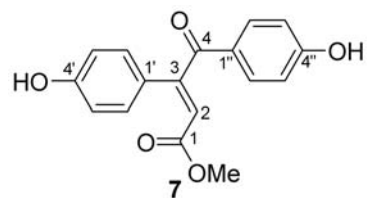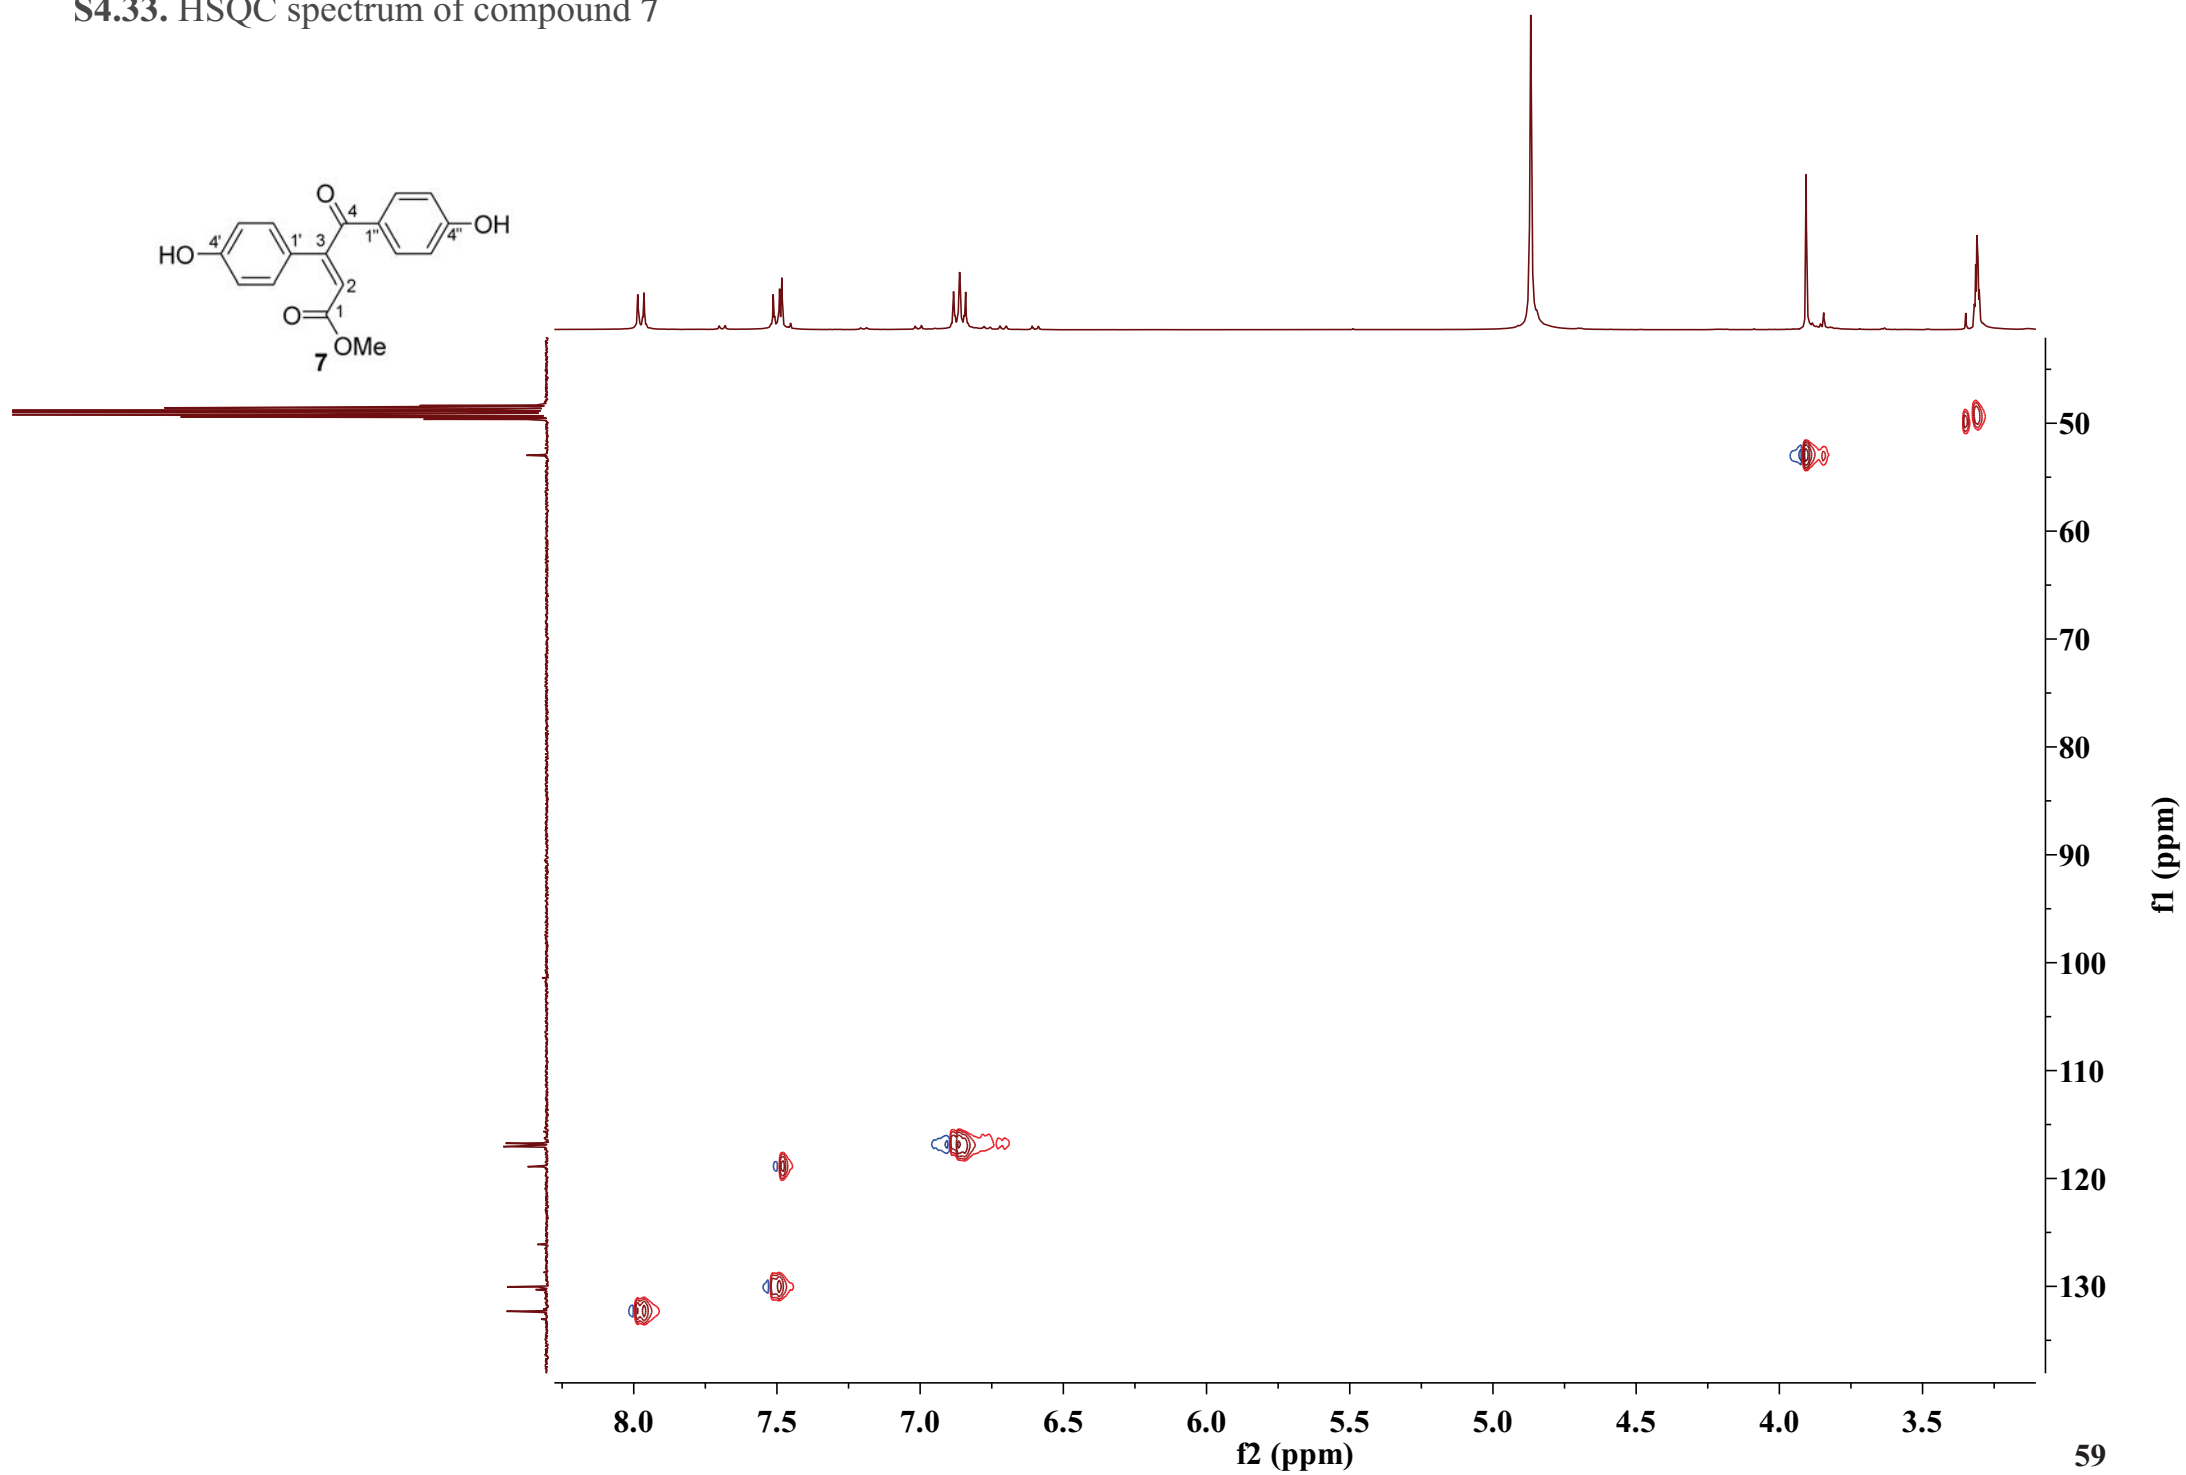

S4.34. HMBC spectrum of compound 7

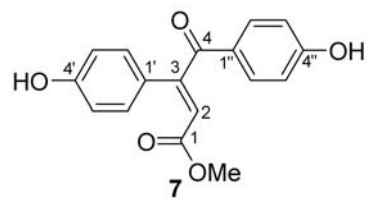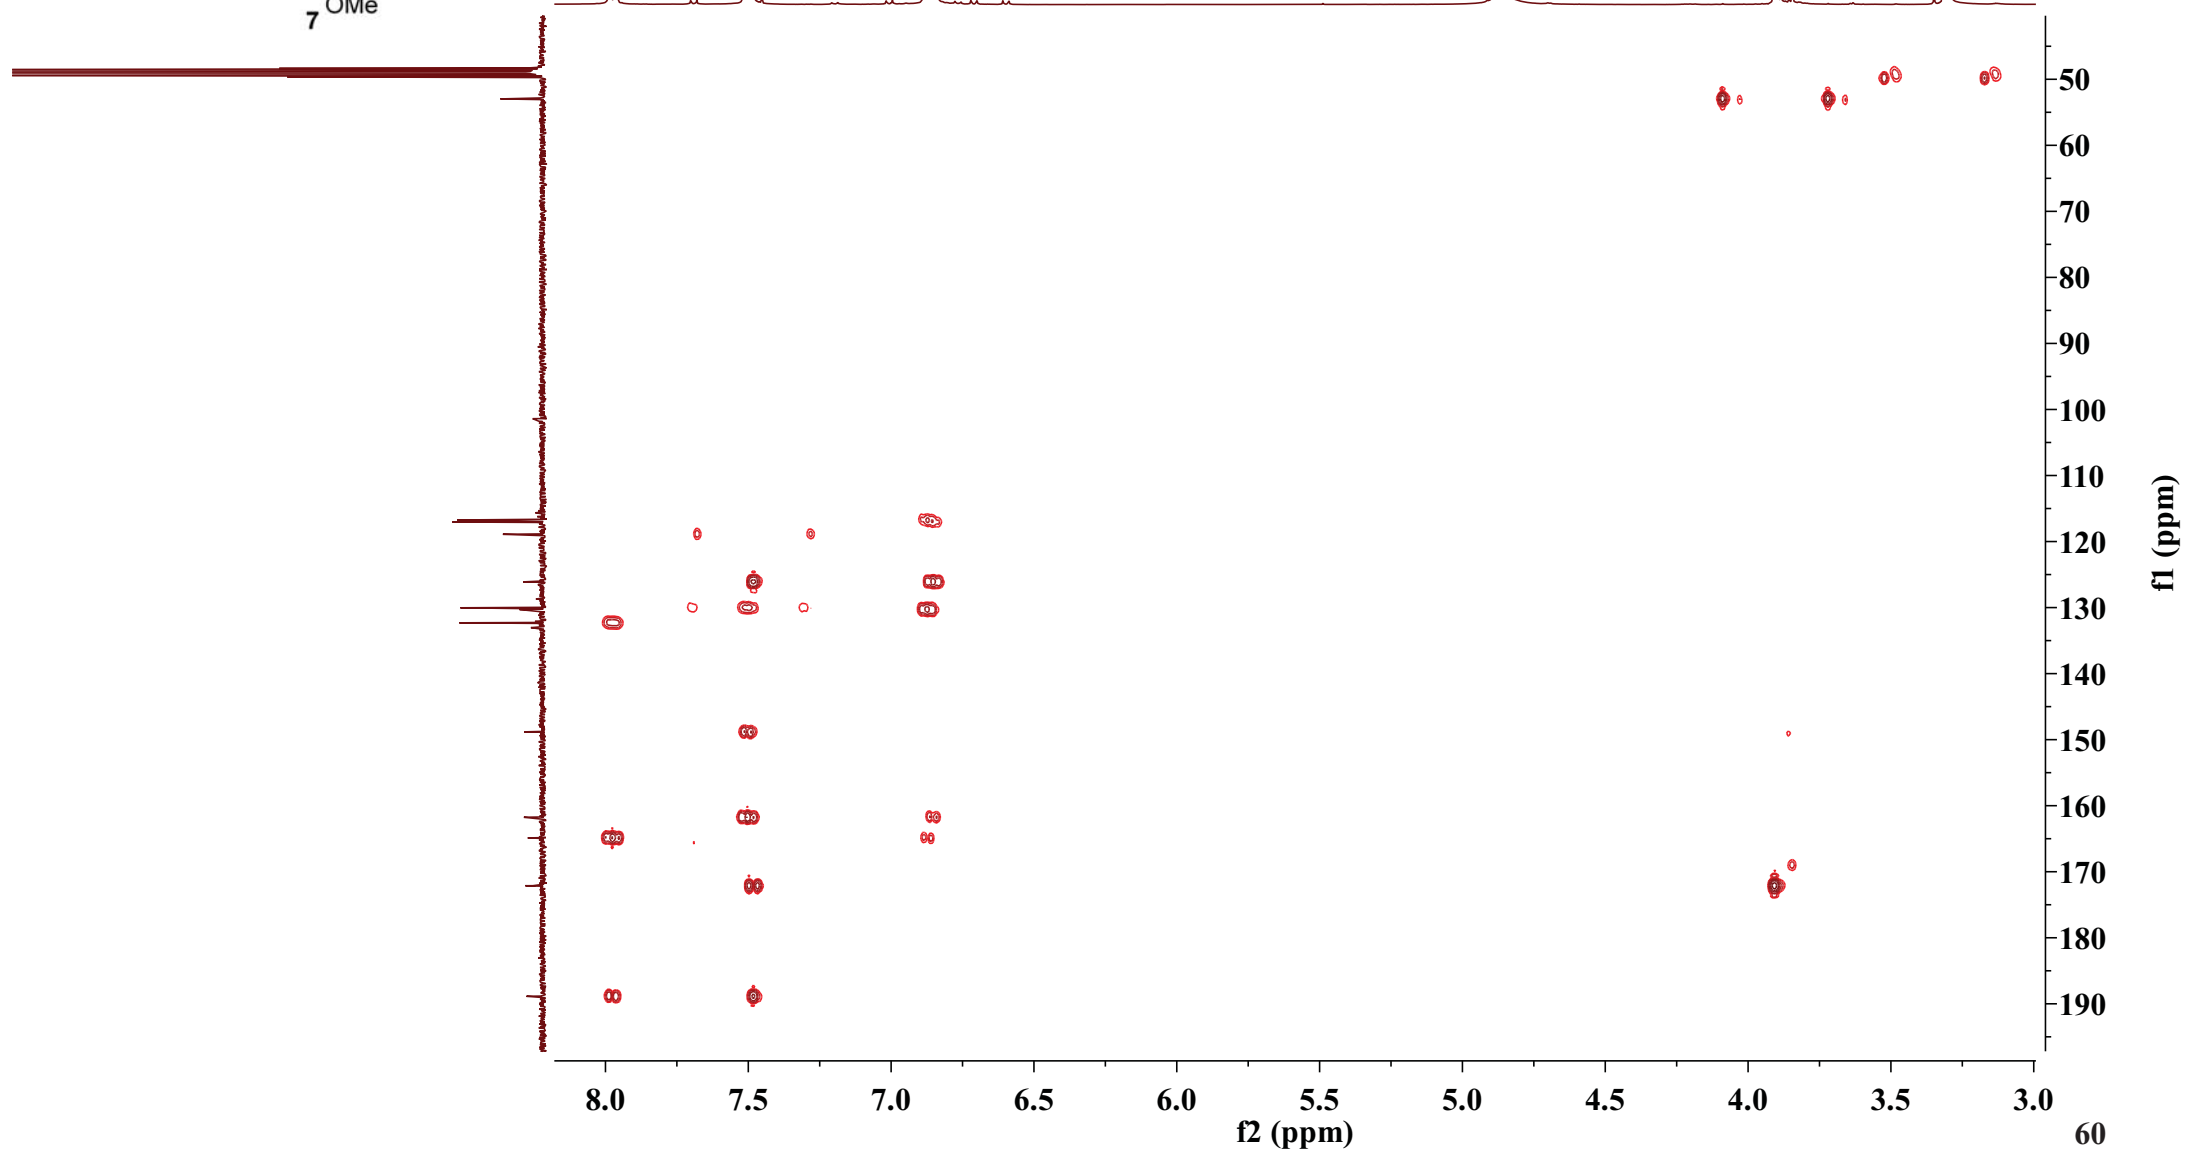

S4.35. NOESY spectrum of compound 7

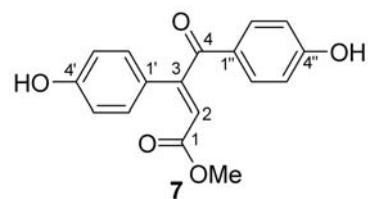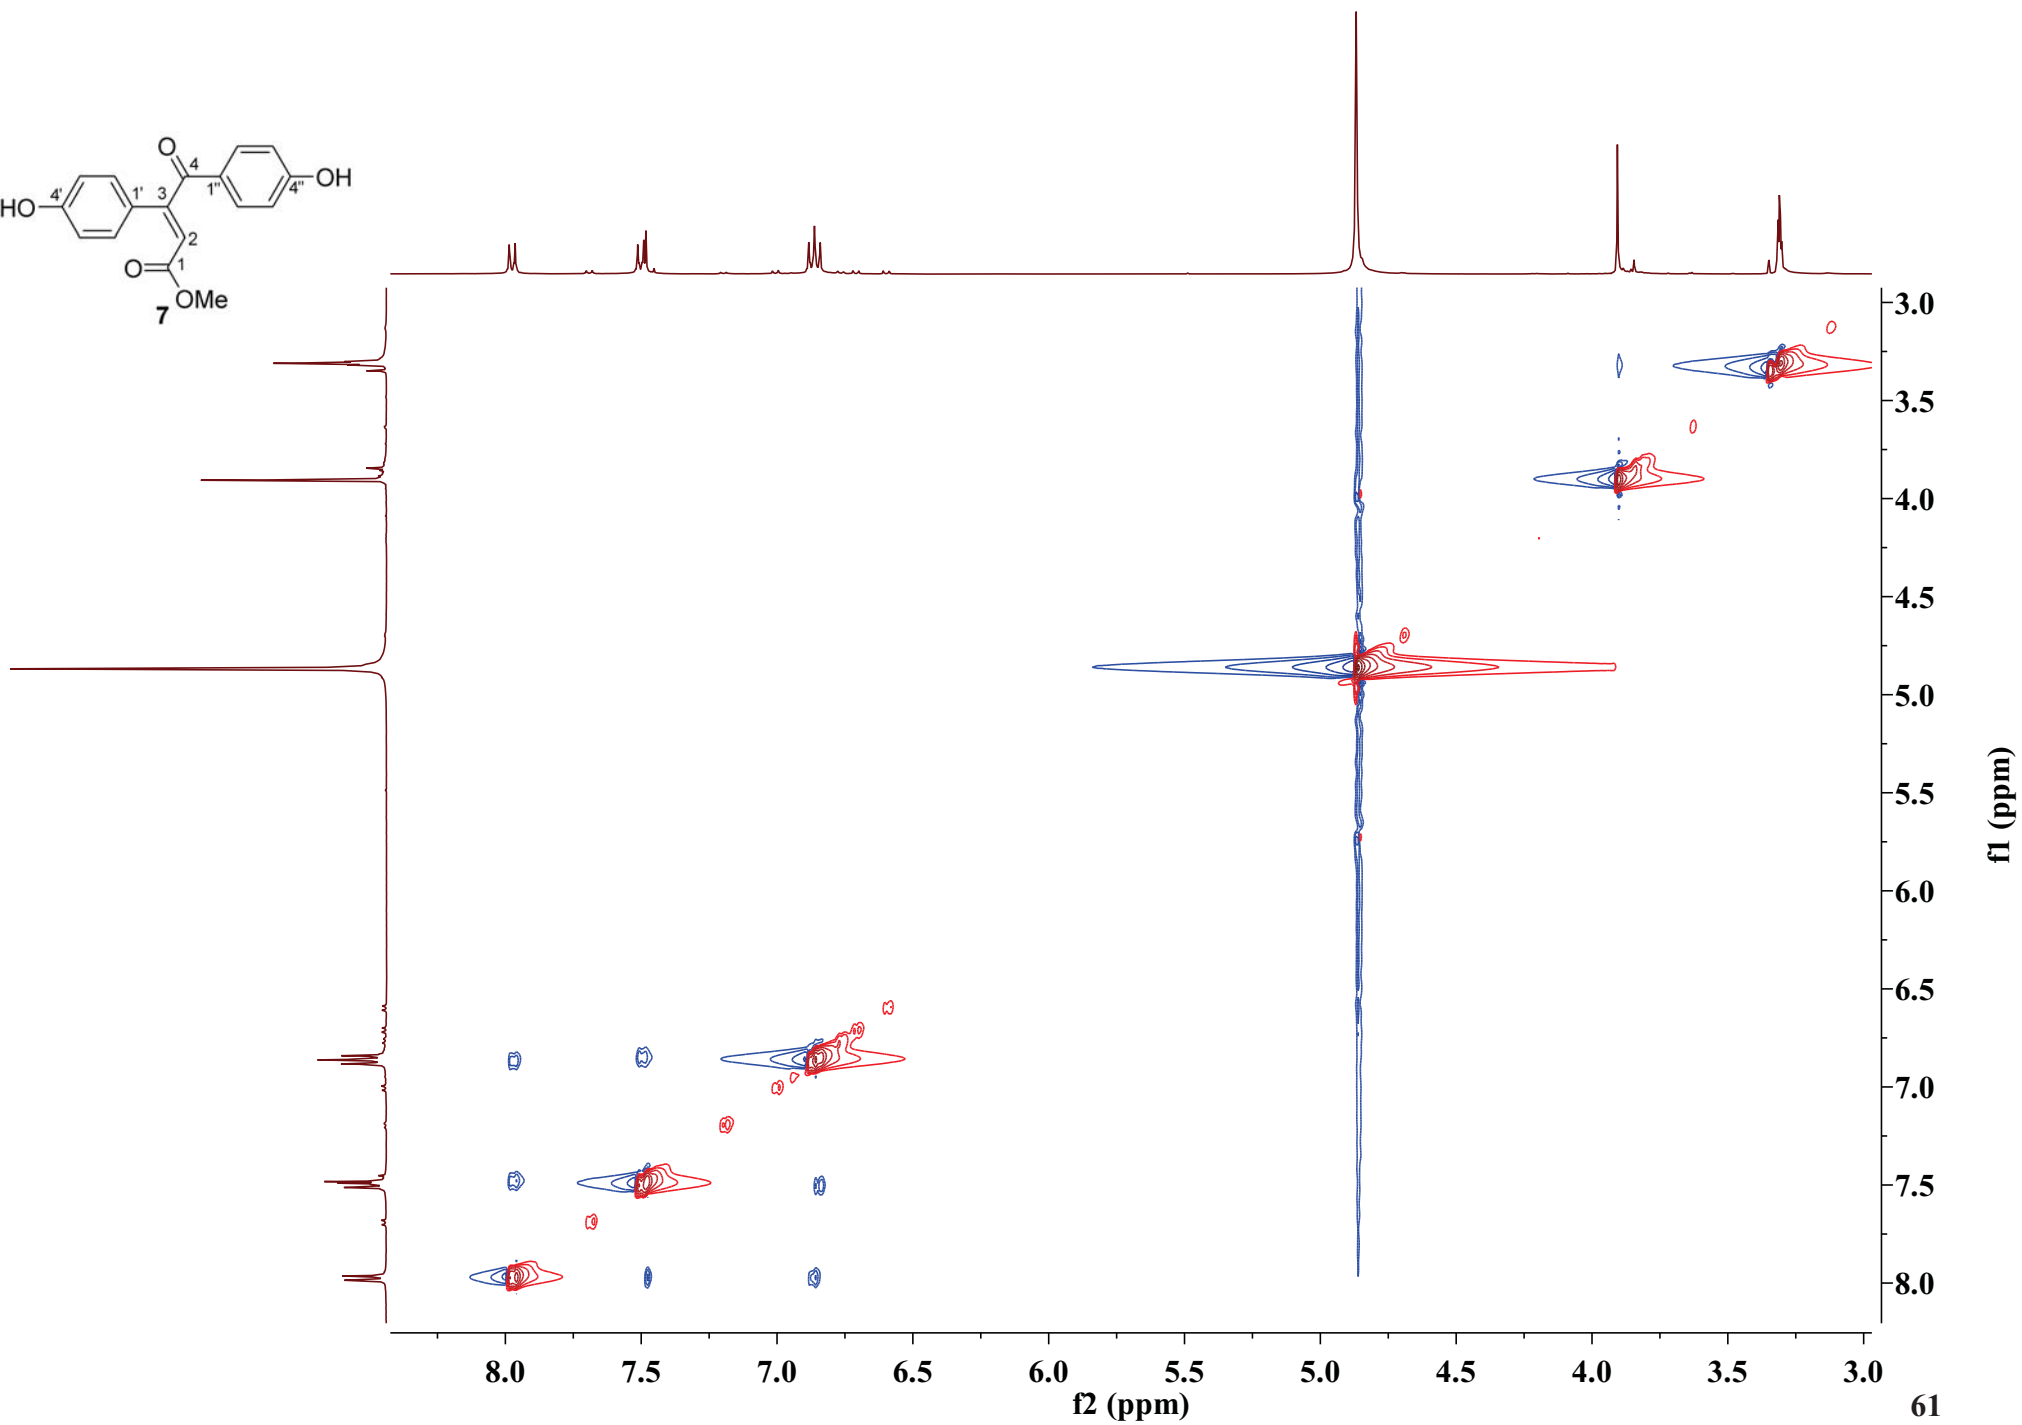

## S5.1. ESIMS data of compound 1

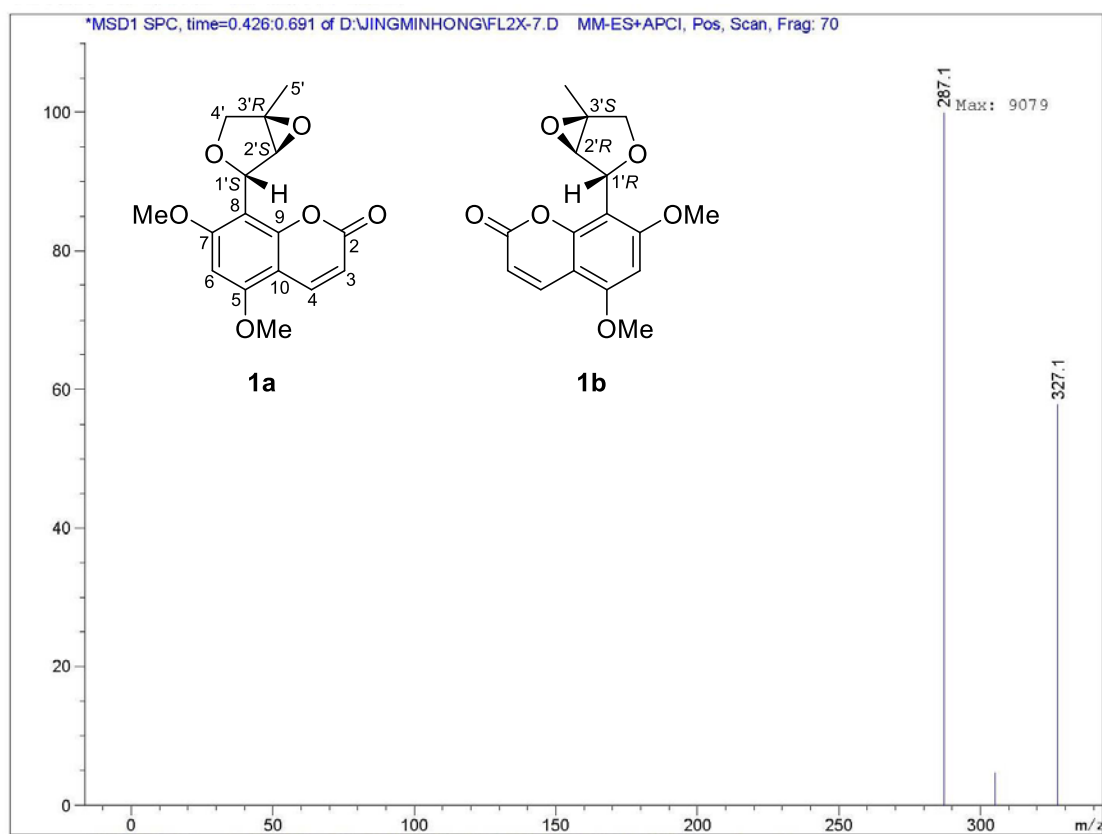

## S5.2. HRESIMS data of compound 1

yflzx-7 #160-187 RT: 1.51-1.77 AV: 28 NL: 4.57E3  
F: FTMS - p ESI Full ms [200.00-800.00]

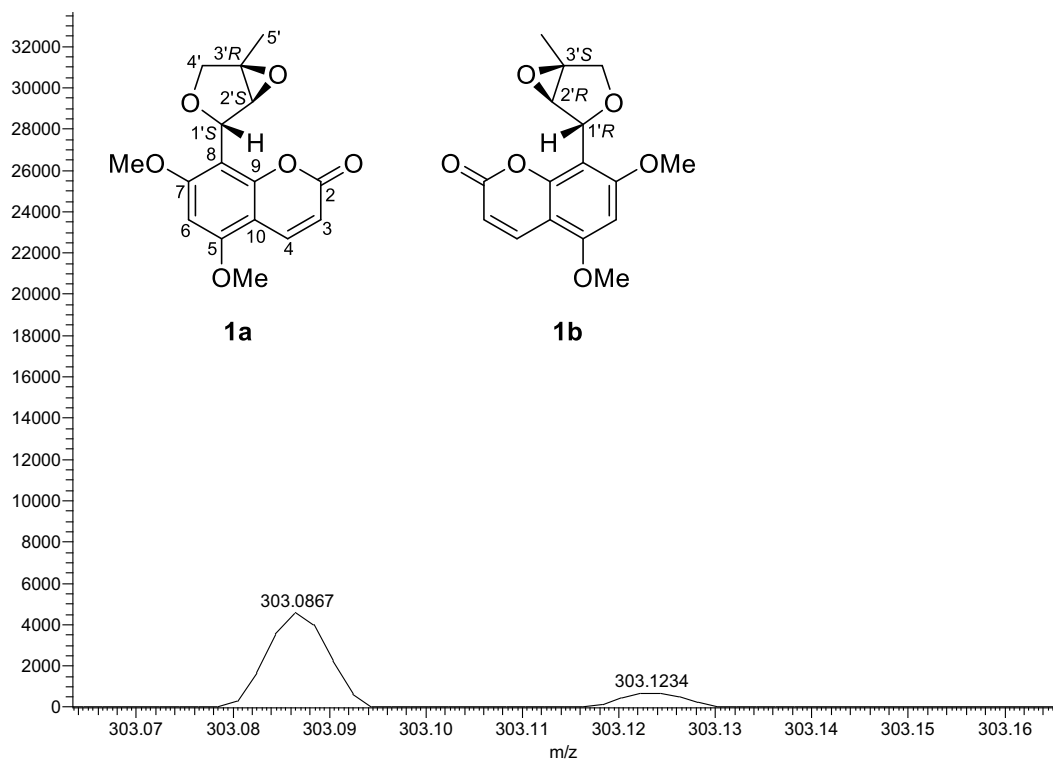

### S5.3. ESIMS data of compound 2

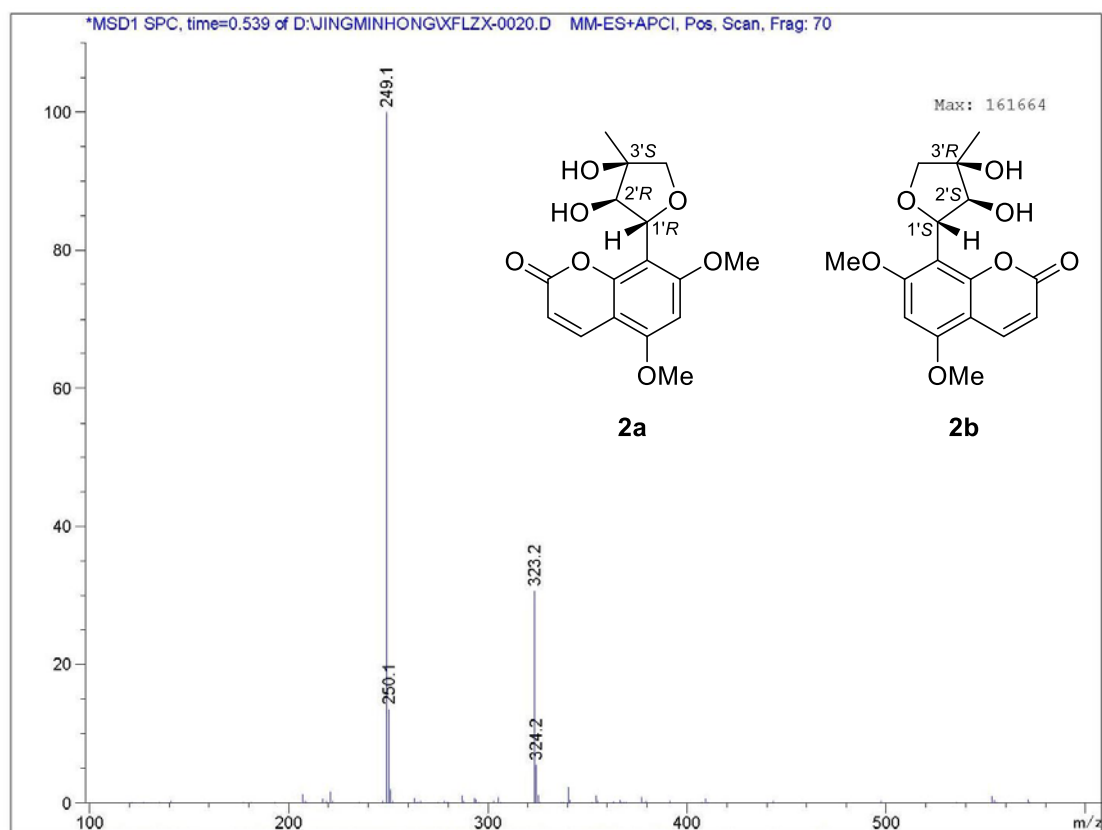

### S5.4. HRESIMS data of compound 2

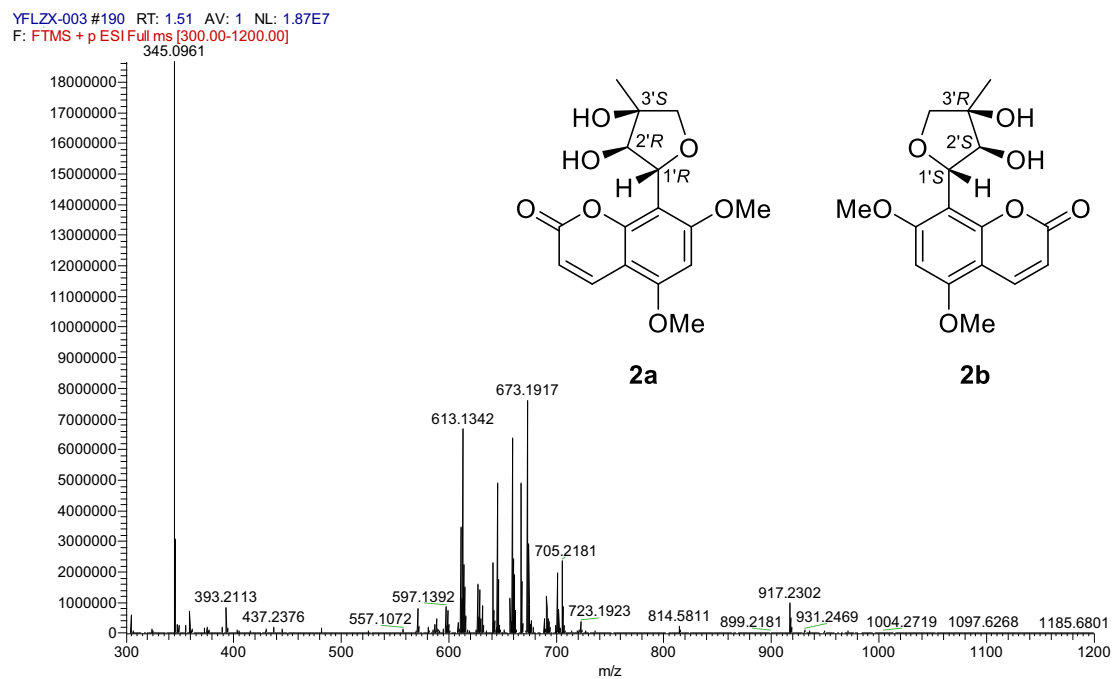

### S5.5. ESIMS data of compound 3

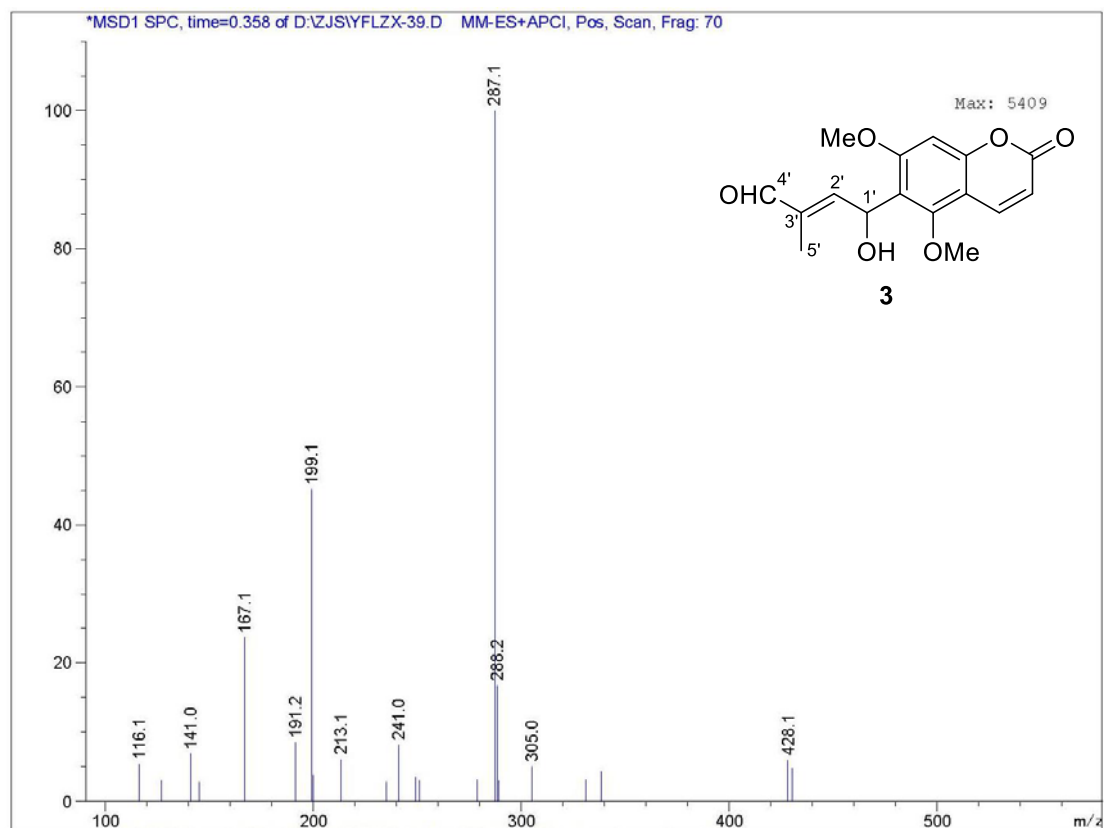

### S5.6. HRESIMS data of compound 3

YFLZX-39#144-351 RT: 1.26-2.91 AV: 208 NL: 1.92E5  
F: FTMS - p ESI Full ms [200.00-1000.00]

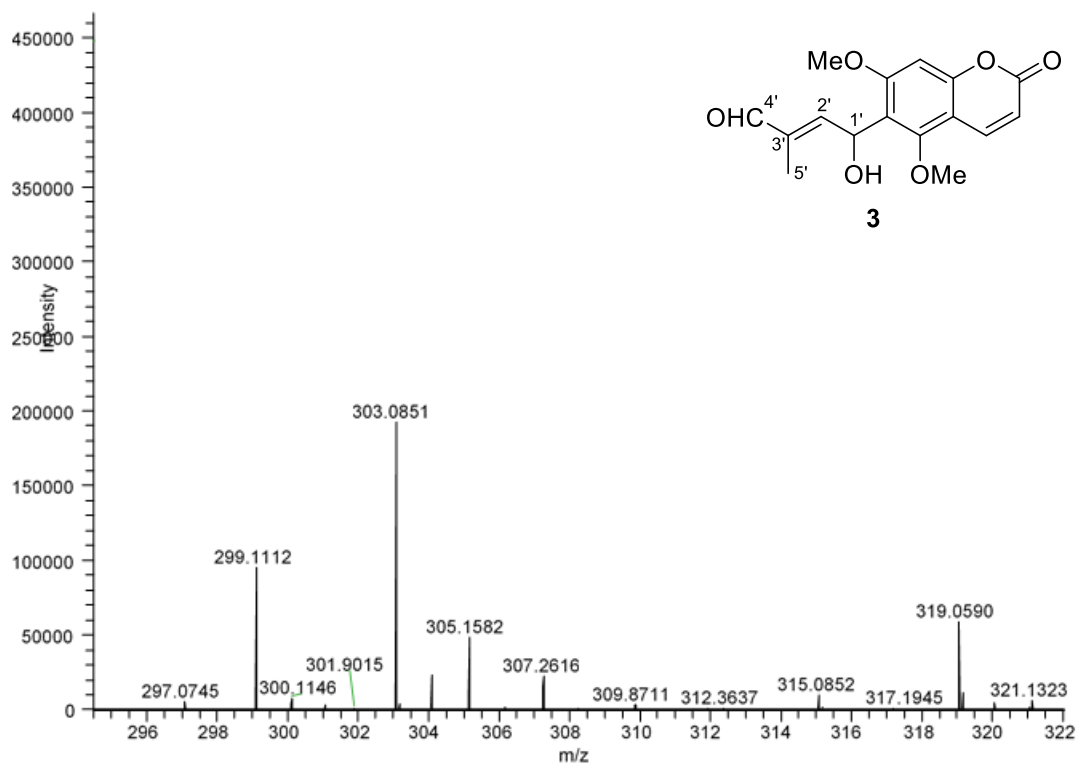



## S5.7. ESIMS data of compound 4

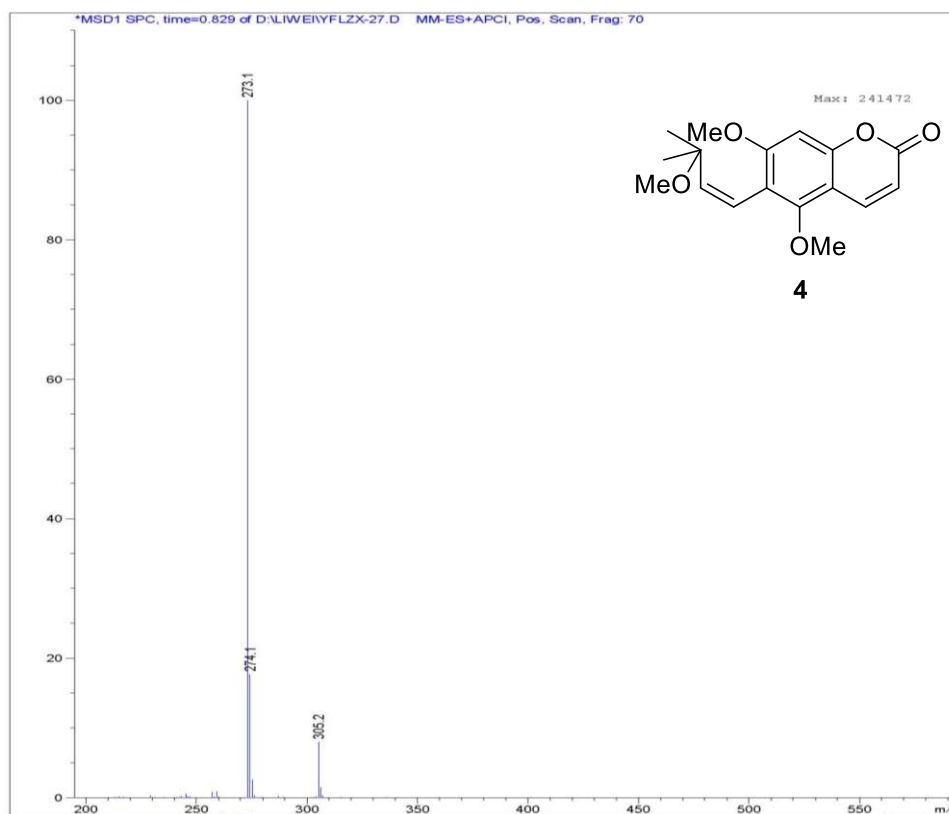

## S5.8. HRESIMS data of compound 4

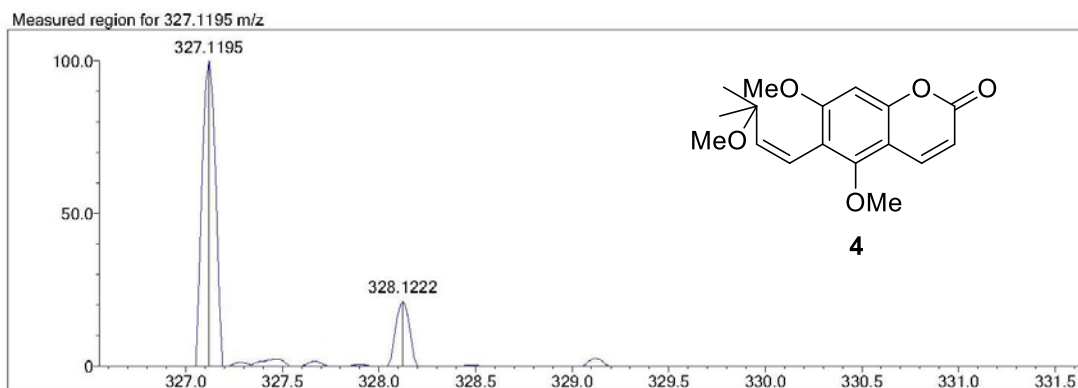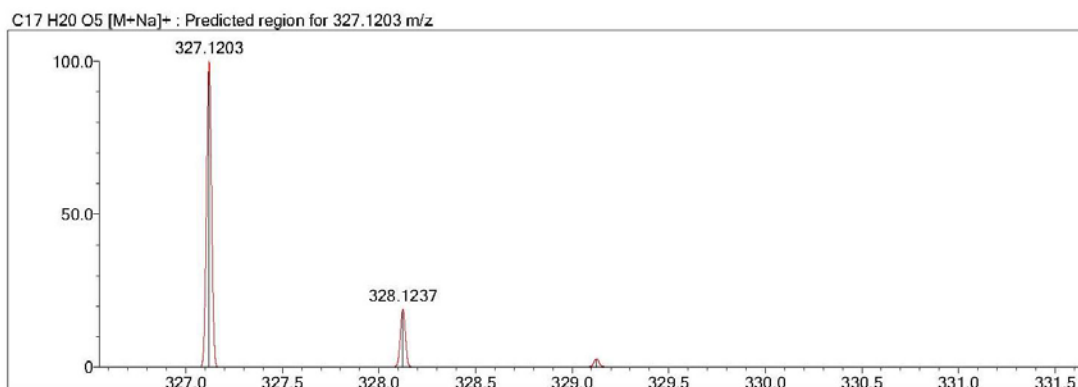

| Rank | Score | Formula (M) | Ion                 | Meas. m/z | Pred. m/z | Df. (mDa) | Df. (ppm) | Iso   | DBE |
|------|-------|-------------|---------------------|-----------|-----------|-----------|-----------|-------|-----|
| 1    | 75.82 | C17 H20 O5  | [M+Na] <sup>+</sup> | 327.1195  | 327.1203  | -0.8      | -2.45     | 78.67 | 8.0 |

## S5.9. ESIMS data of compound 5

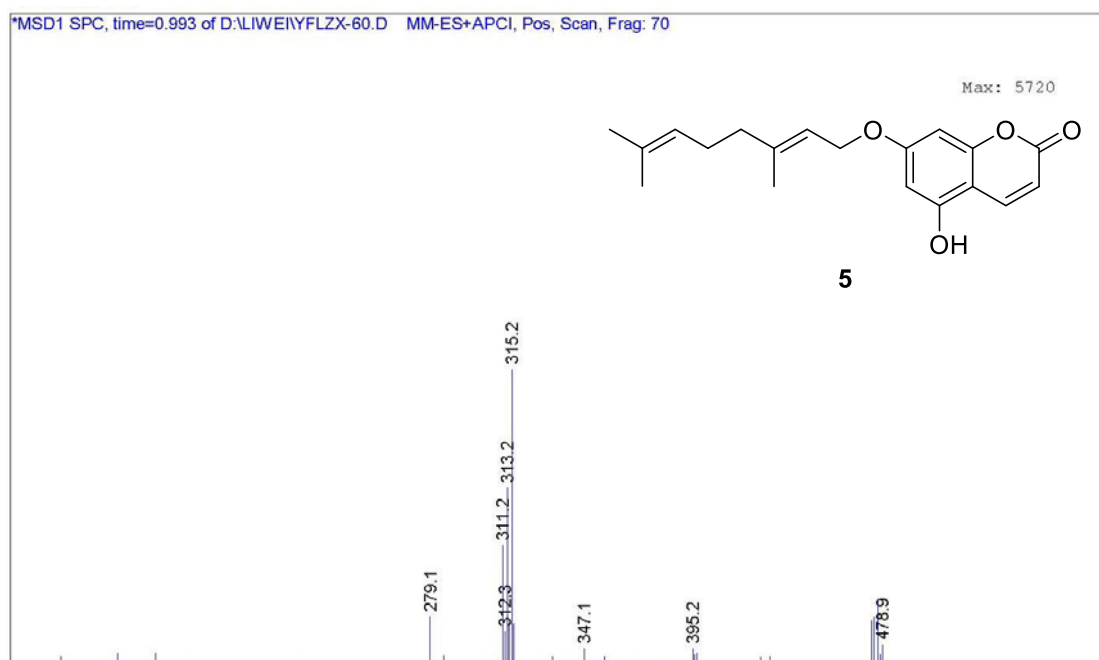

## S5.10. HRESIMS data of compound 5

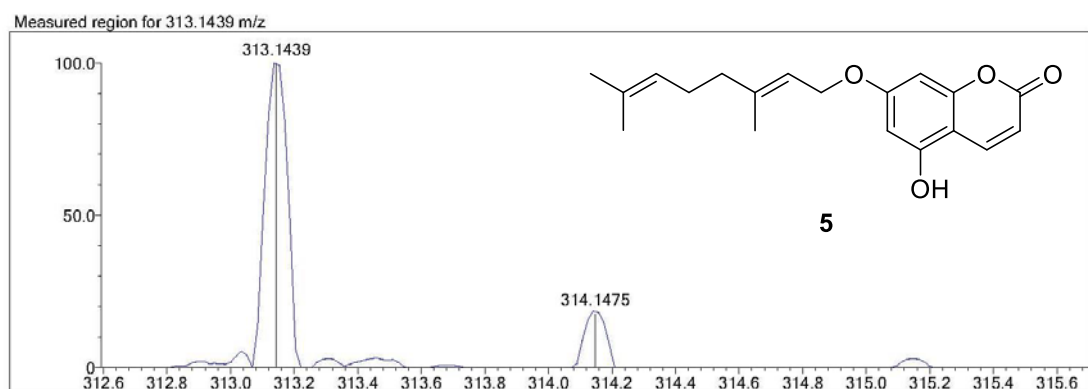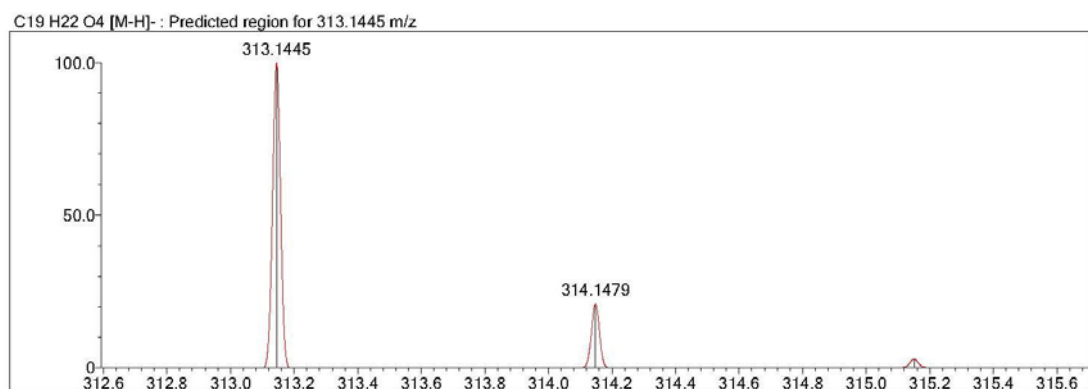

| Rank | Score | Formula (M) | Ion                | Meas. m/z | Pred. m/z | Df. (mDa) | Df. (ppm) | Iso   | DBE |
|------|-------|-------------|--------------------|-----------|-----------|-----------|-----------|-------|-----|
| 2    | 77.24 | C19 H22 O4  | [M-H] <sup>-</sup> | 313.1439  | 313.1445  | -0.6      | -1.92     | 79.06 | 9.0 |

## S5.11. ESIMS data of compound 6

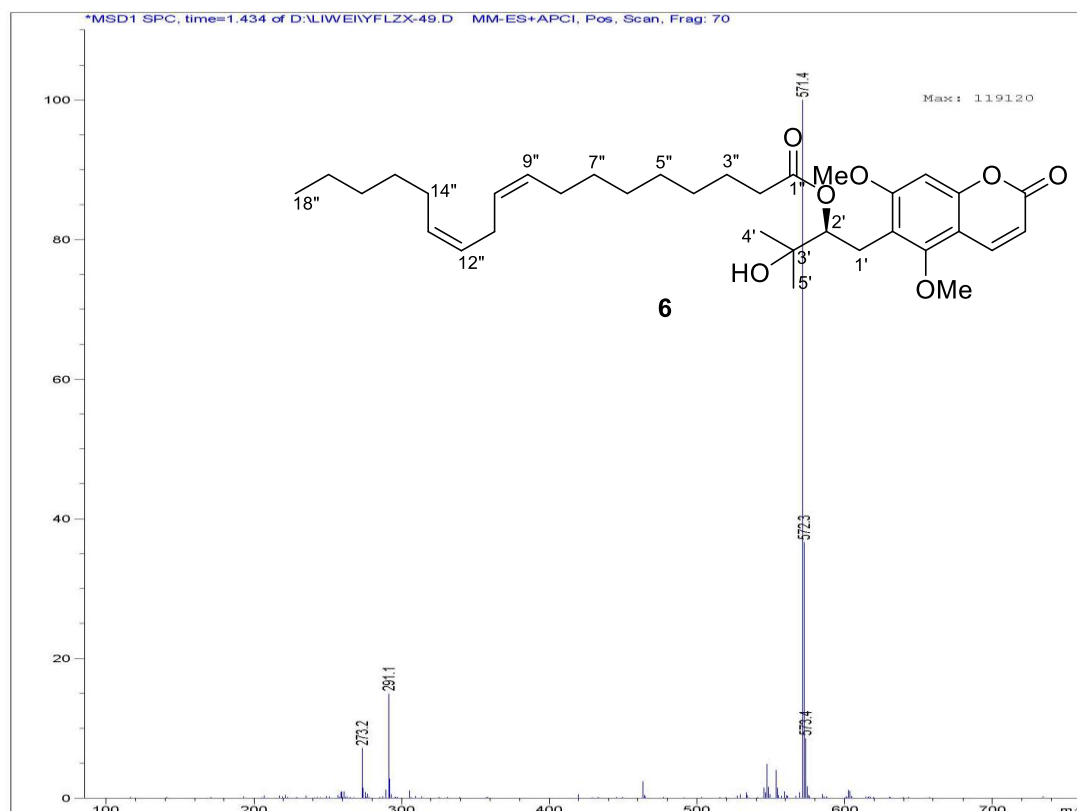

## S5.12. HRESIMS data of compound 6

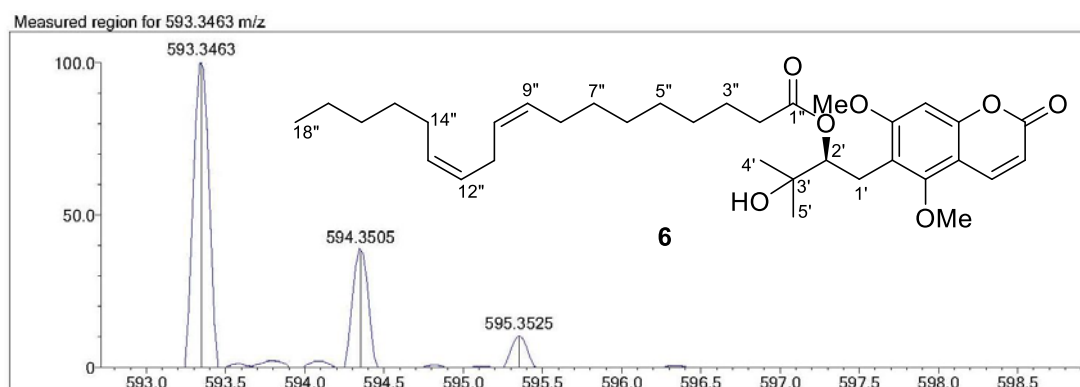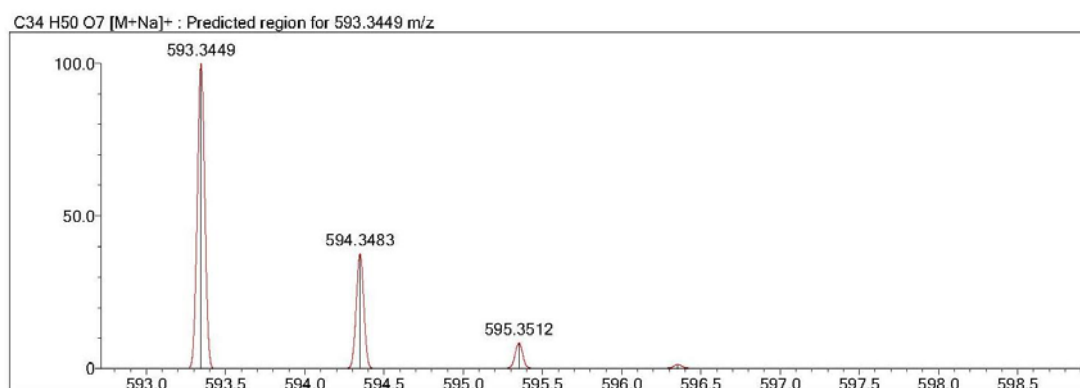

| Rank | Score | Formula (M) | Ion                 | Meas. m/z | Pred. m/z | Df. (mDa) | Df. (ppm) | Iso   | DBE  |
|------|-------|-------------|---------------------|-----------|-----------|-----------|-----------|-------|------|
| 1    | 78.90 | C34 H50 O7  | [M+Na] <sup>+</sup> | 593.3463  | 593.3449  | 1.4       | 2.36      | 81.68 | 10.0 |

### S5.13. ESIMS data of compound 7

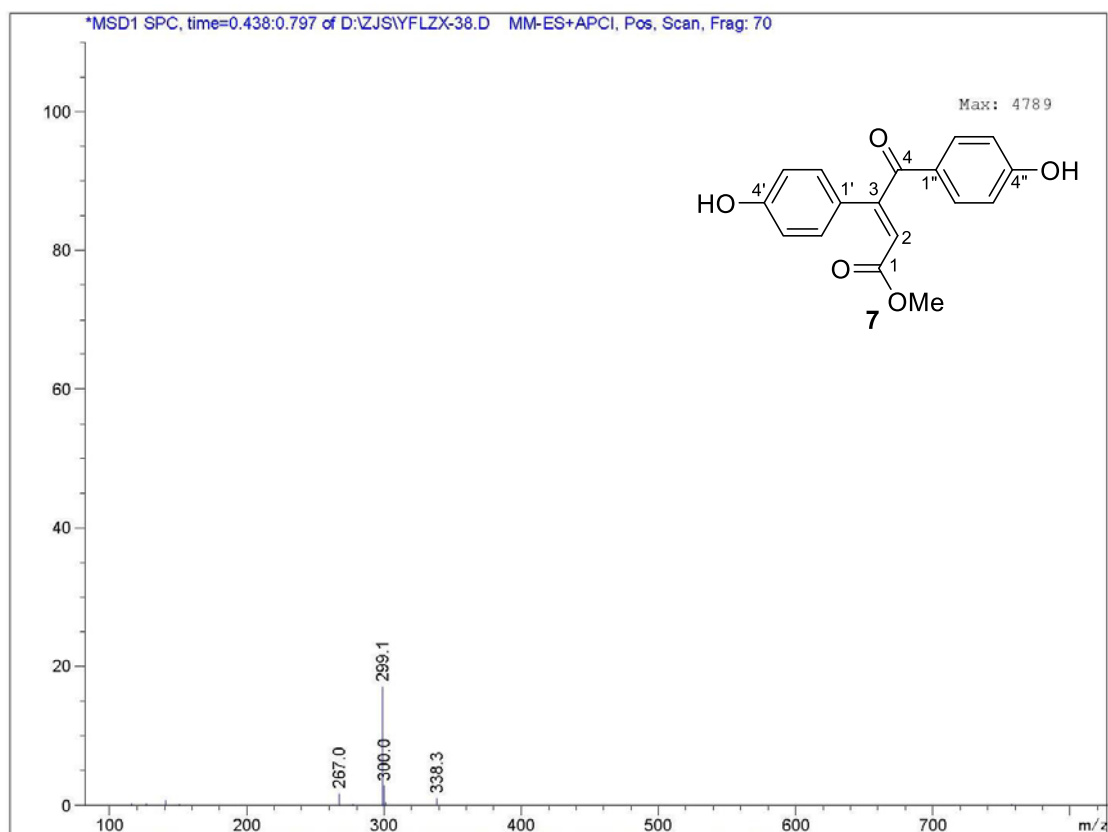

### S5.14. HRESIMS data of compound 7

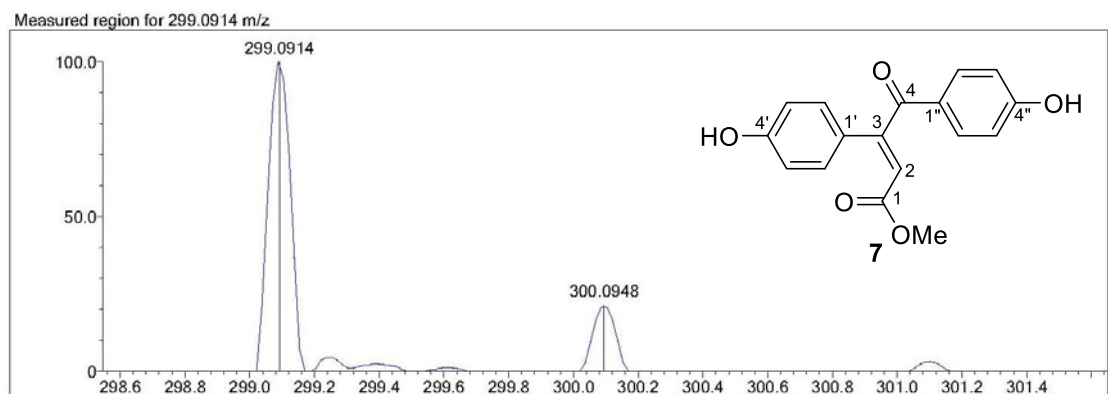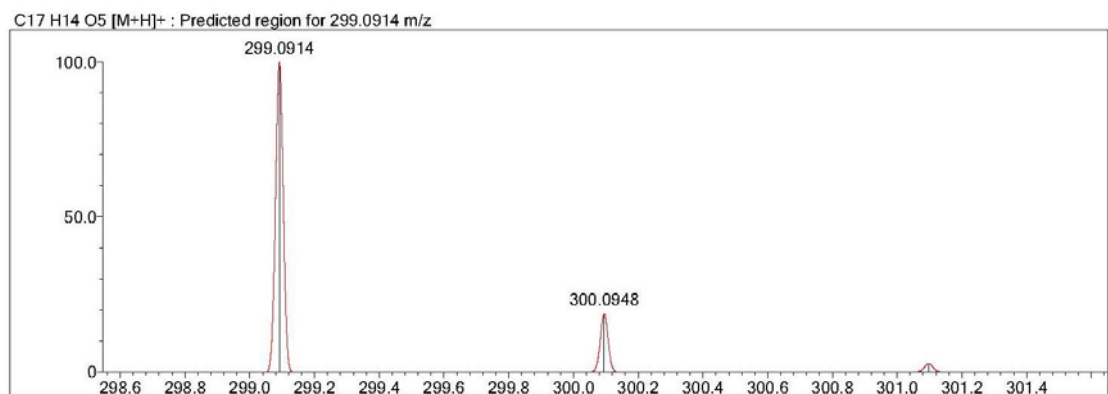

| Rank | Score | Formula (M) | Ion                | Meas. m/z | Pred. m/z | Df. (mDa) | Df. (ppm) | Iso   | DBE  |
|------|-------|-------------|--------------------|-----------|-----------|-----------|-----------|-------|------|
| 1    | 74.74 | C17 H14 O5  | [M+H] <sup>+</sup> | 299.0914  | 299.0914  | -0.0      | 0.00      | 74.74 | 11.0 |

S5.15. IR (KBr disc) spectrum of compound 1

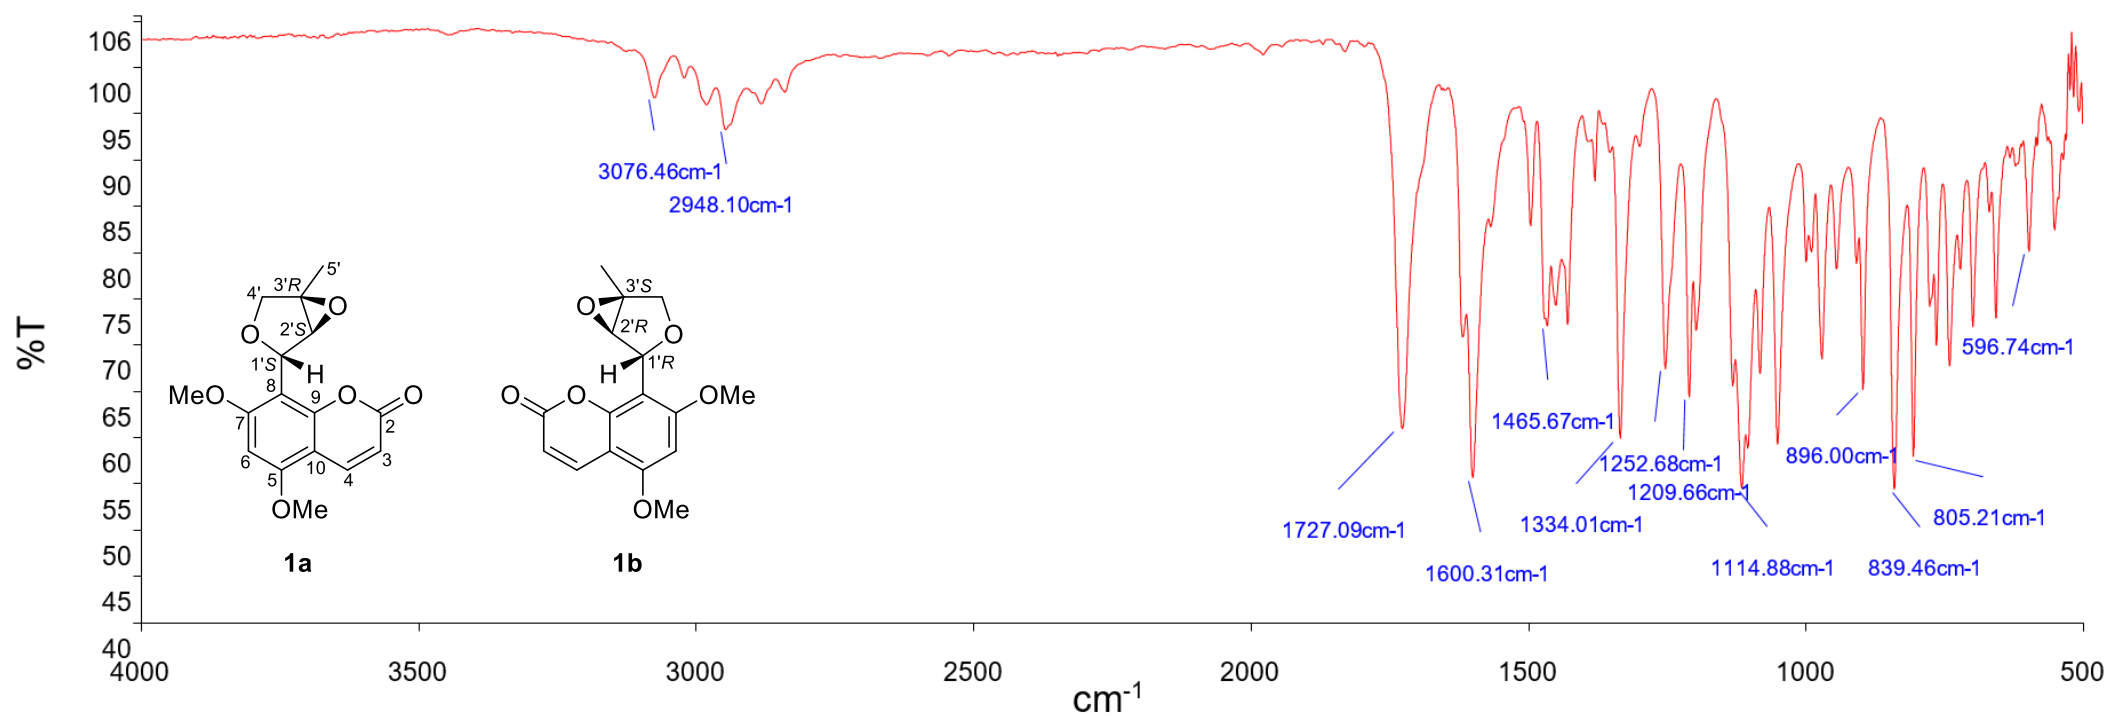

S5.16. IR (KBr disc) spectrum of compound 2

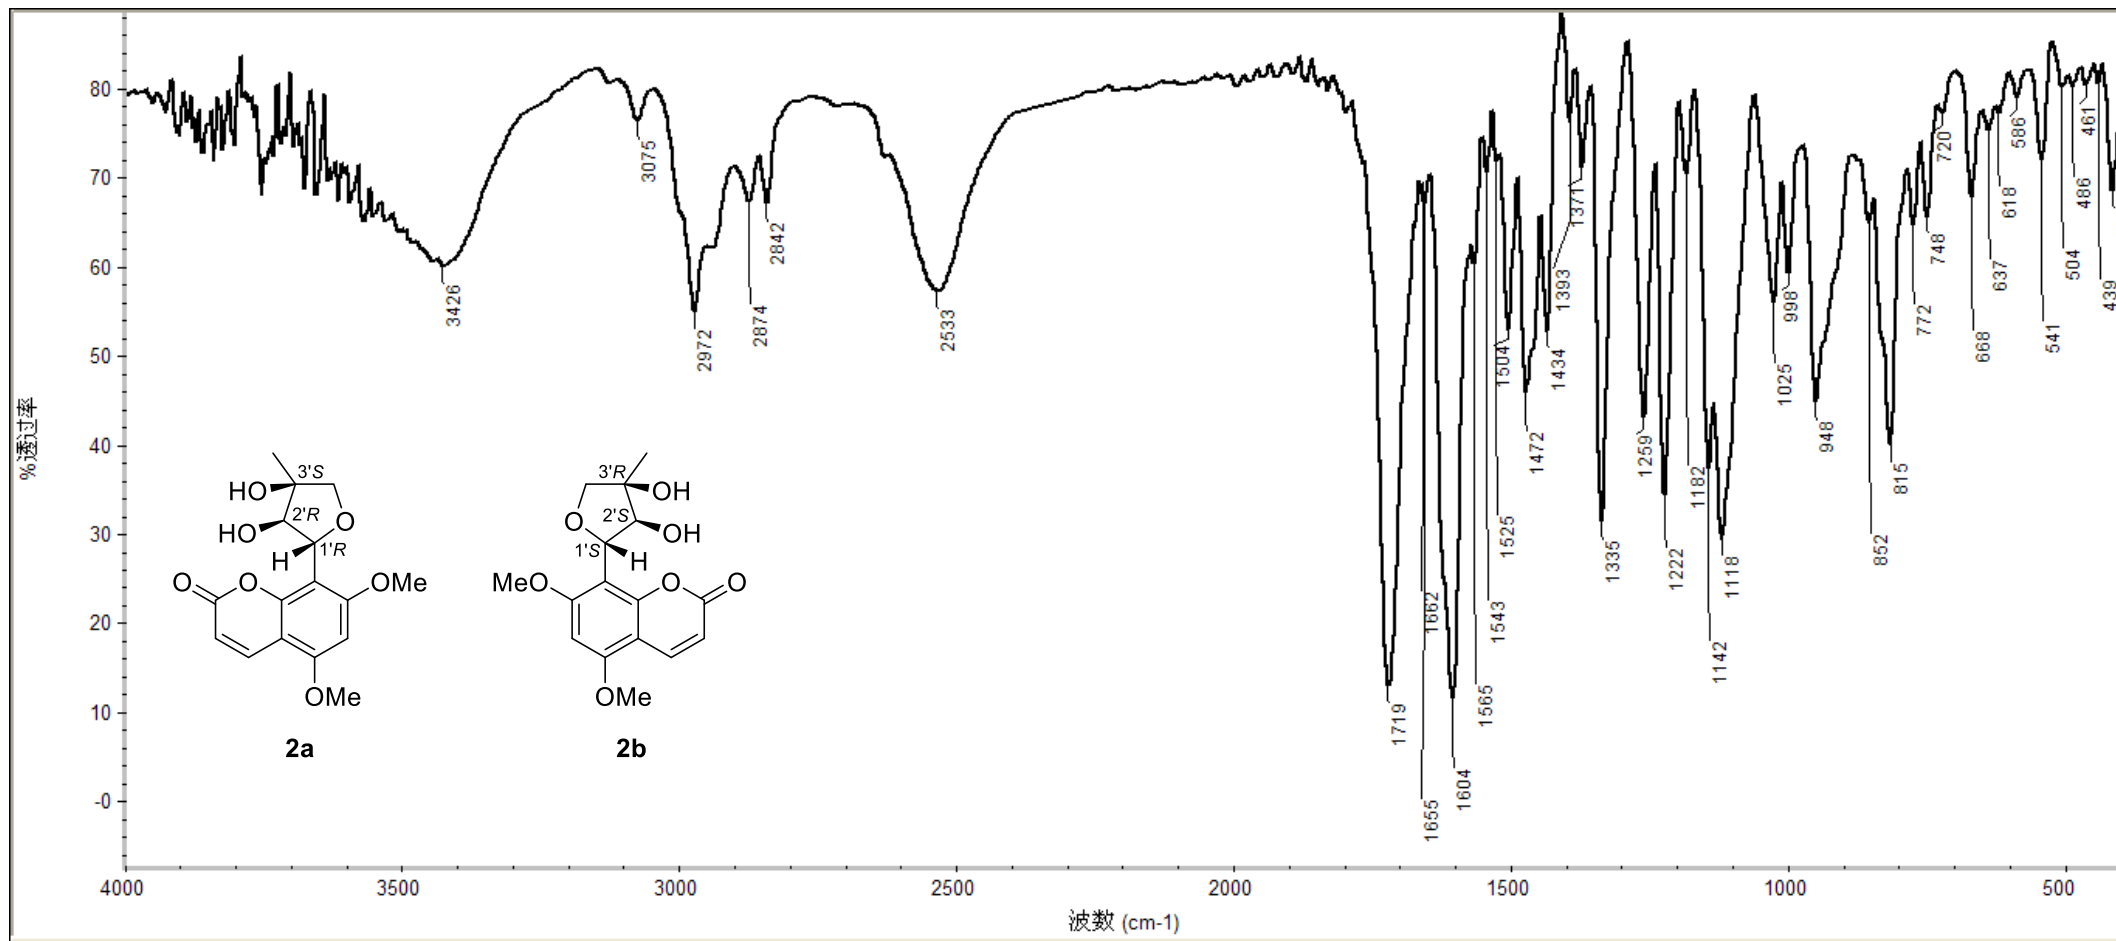

S5.17. IR (KBr disc) spectrum of compound **3**

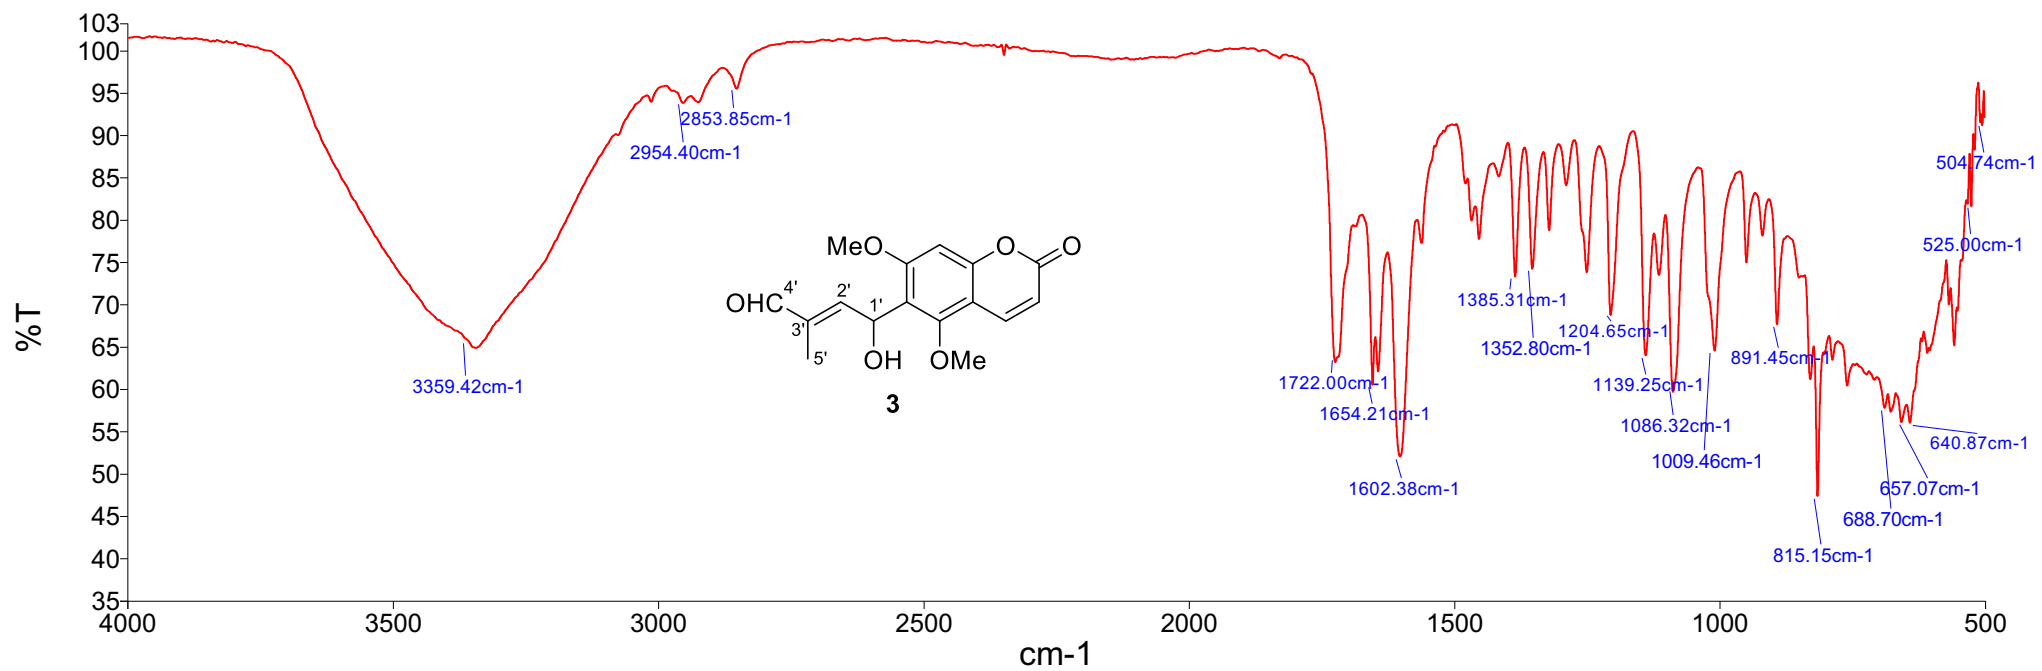

S5.18. IR (KBr disc) spectrum of compound 4

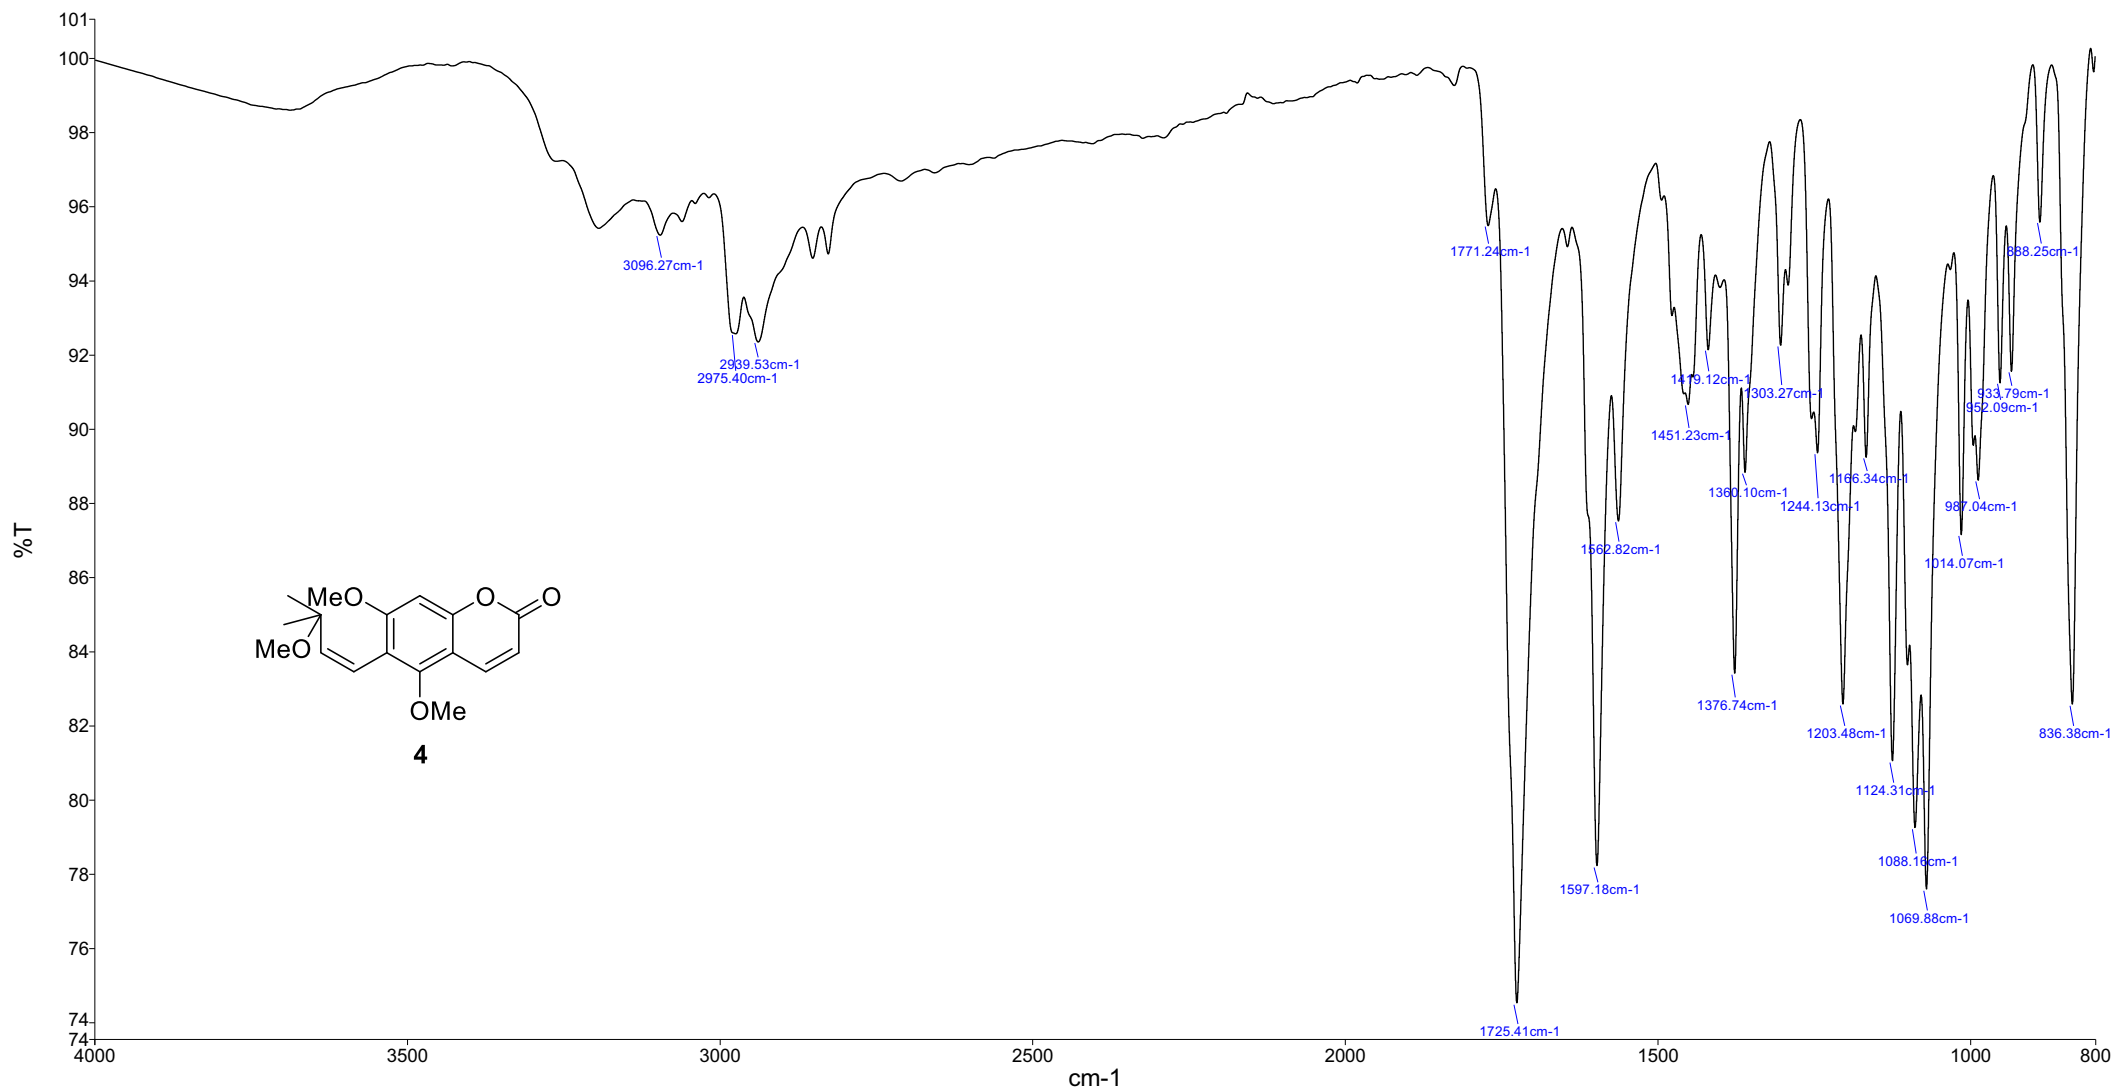



S5.19. IR (KBr disc) spectrum of compound 5

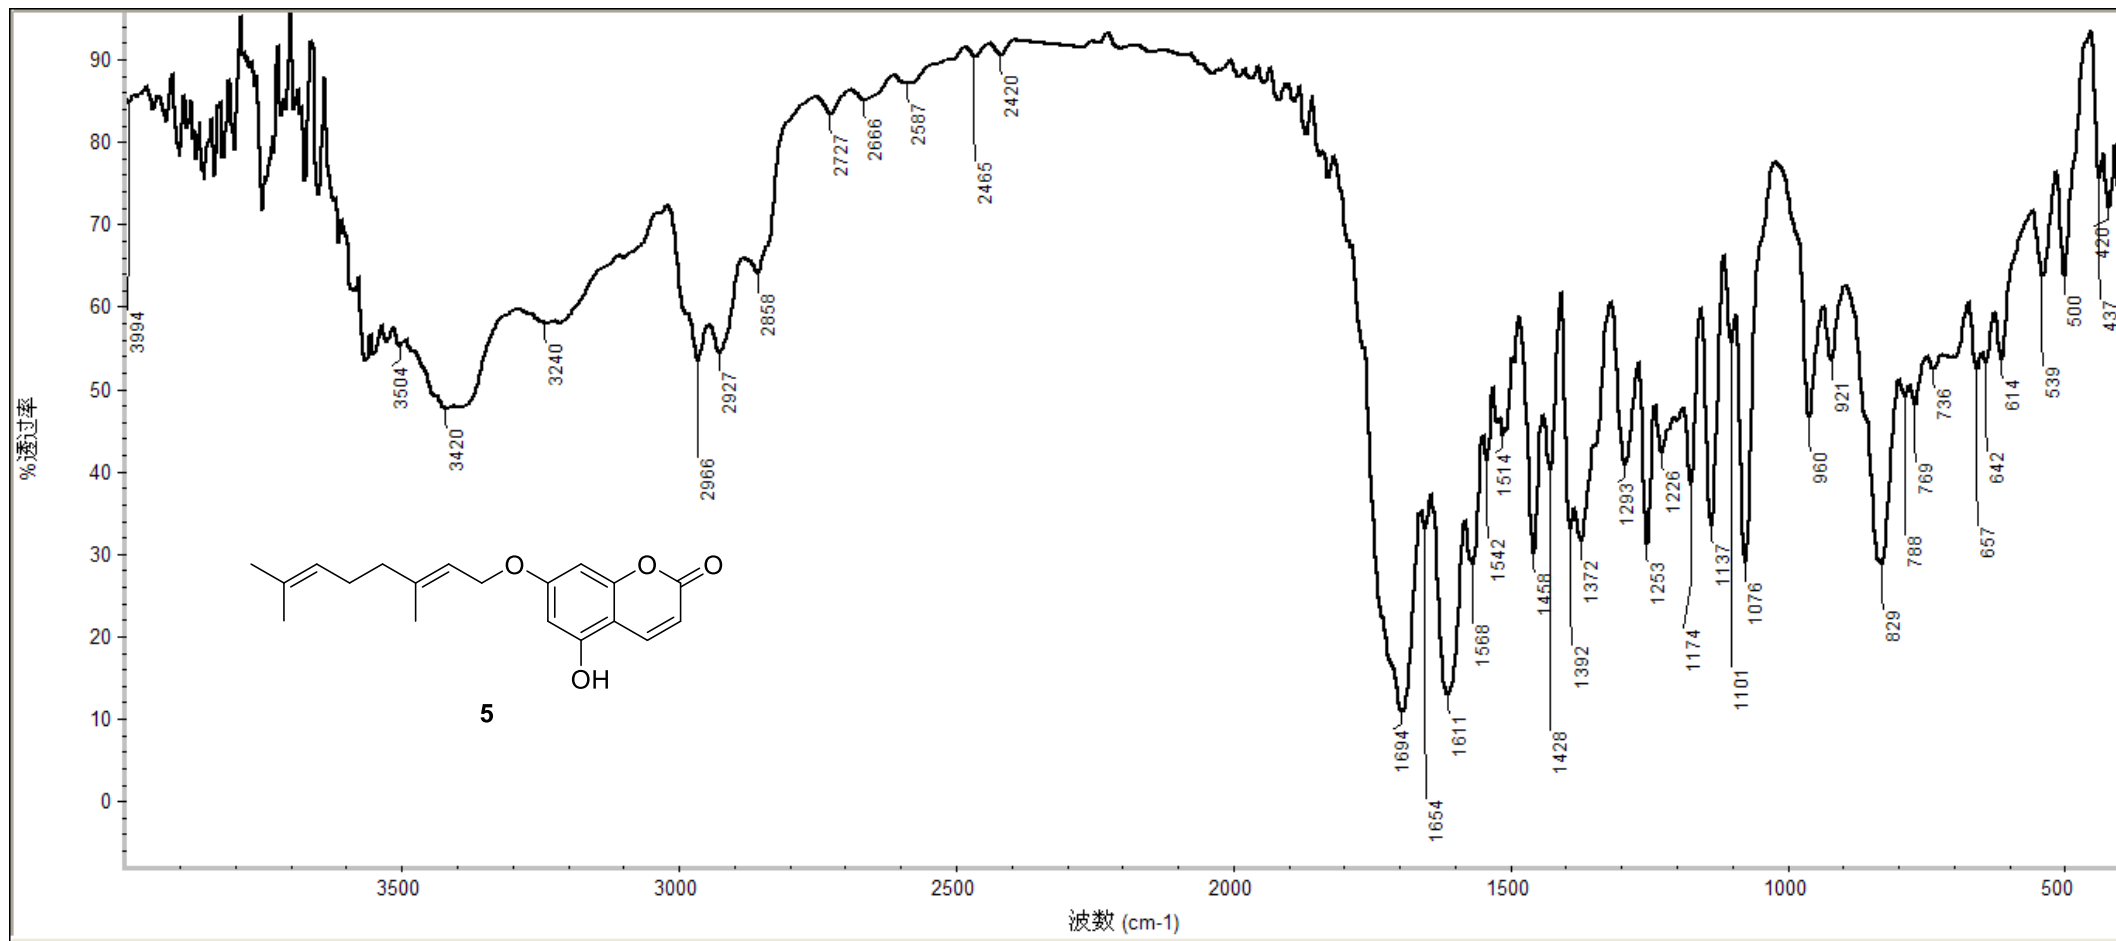

S5.20. IR (KBr disc) spectrum of compound 6

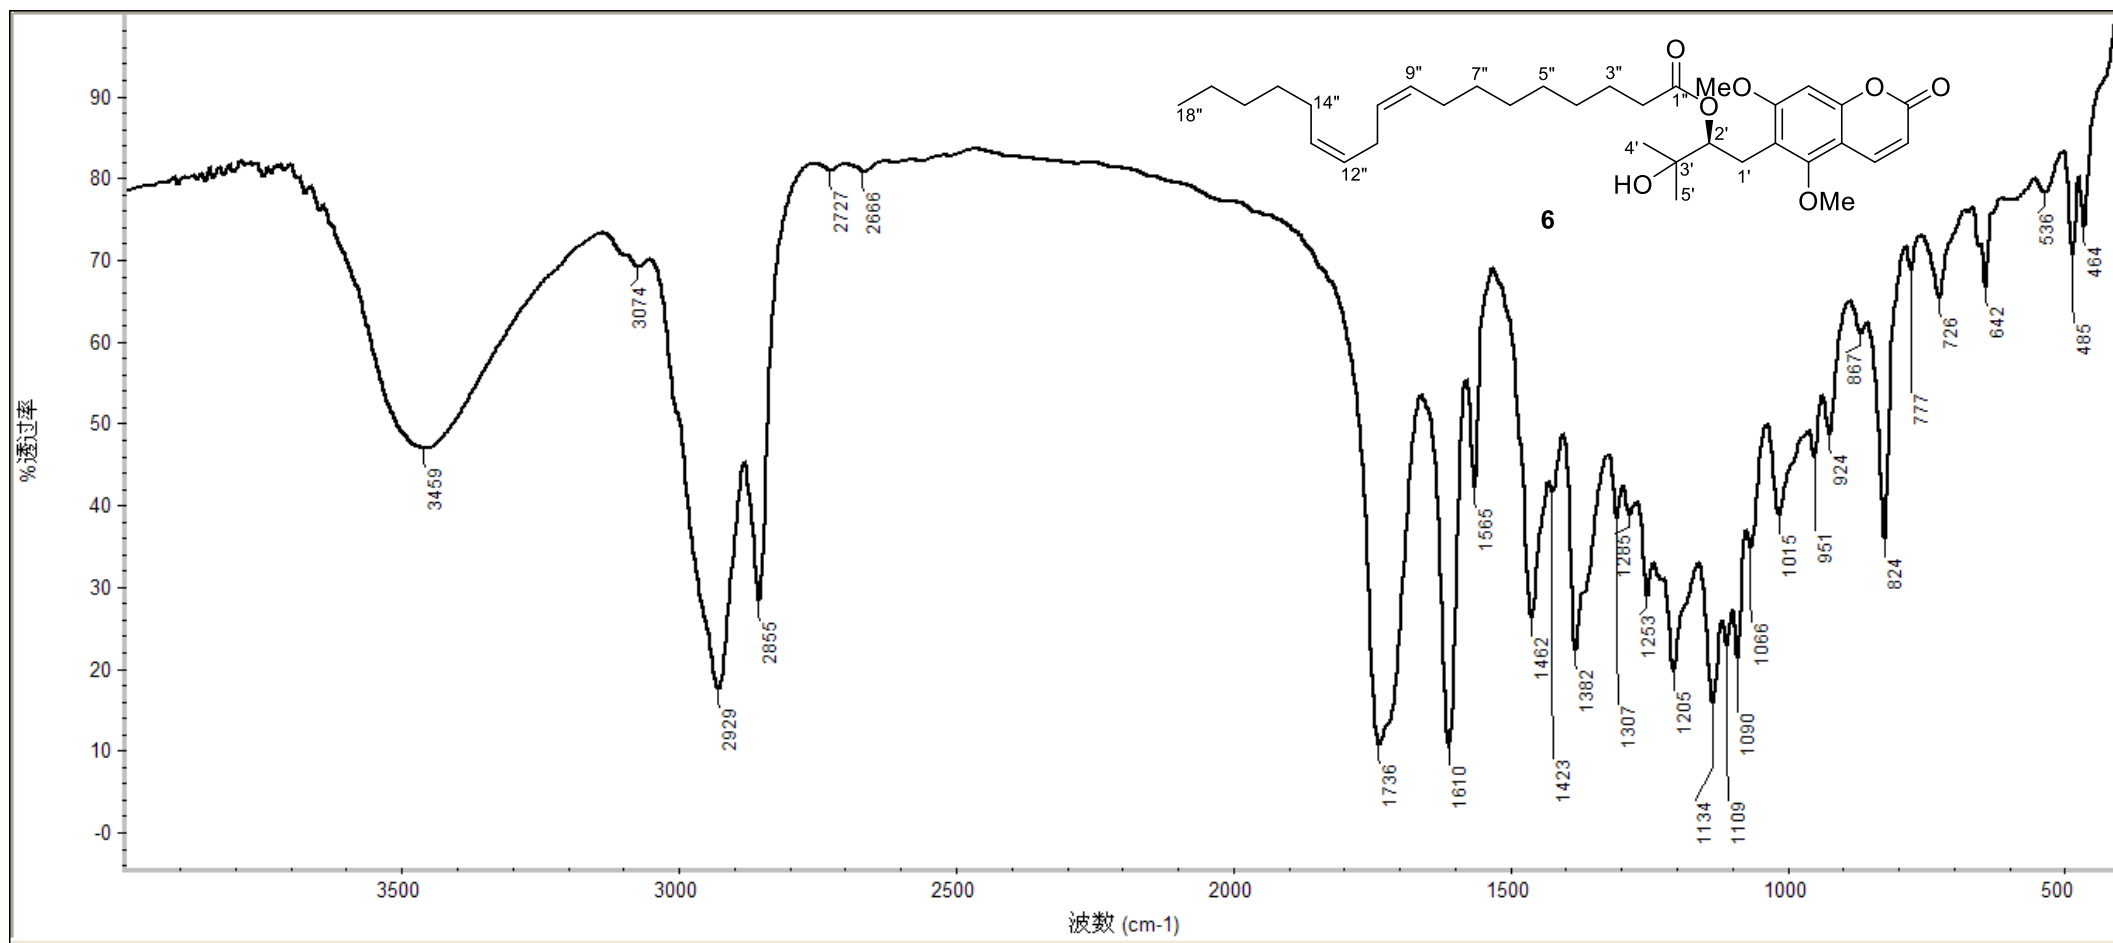

S5.21. IR (KBr disc) spectrum of compound 7

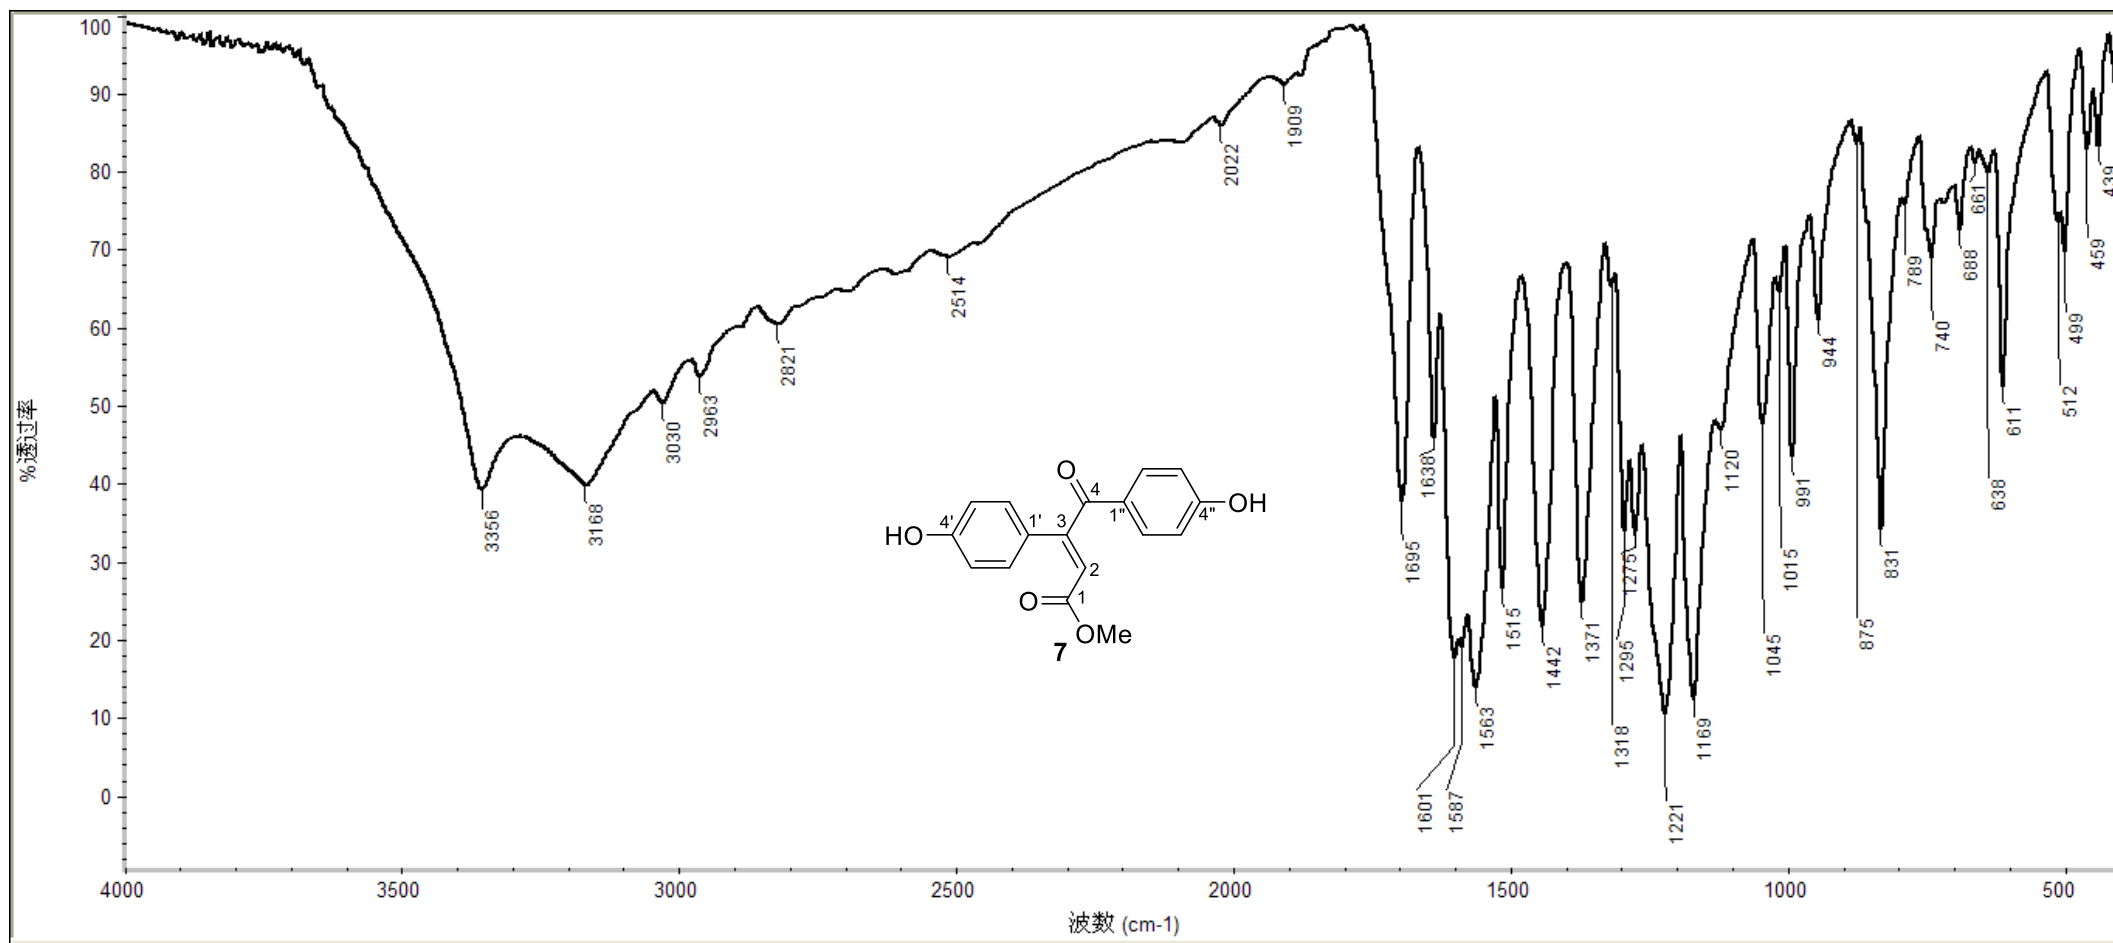

S6.1. <sup>1</sup>H NMR spectrum of compound 8

7.9658  
7.9418

7.3816  
7.3402

6.8149  
6.7735

6.2997  
6.1509  
6.1269

5.1270  
5.0645

3.9525  
3.9298

2.0073

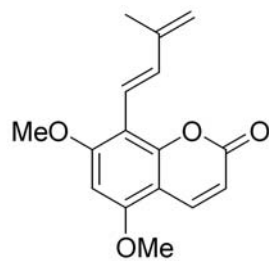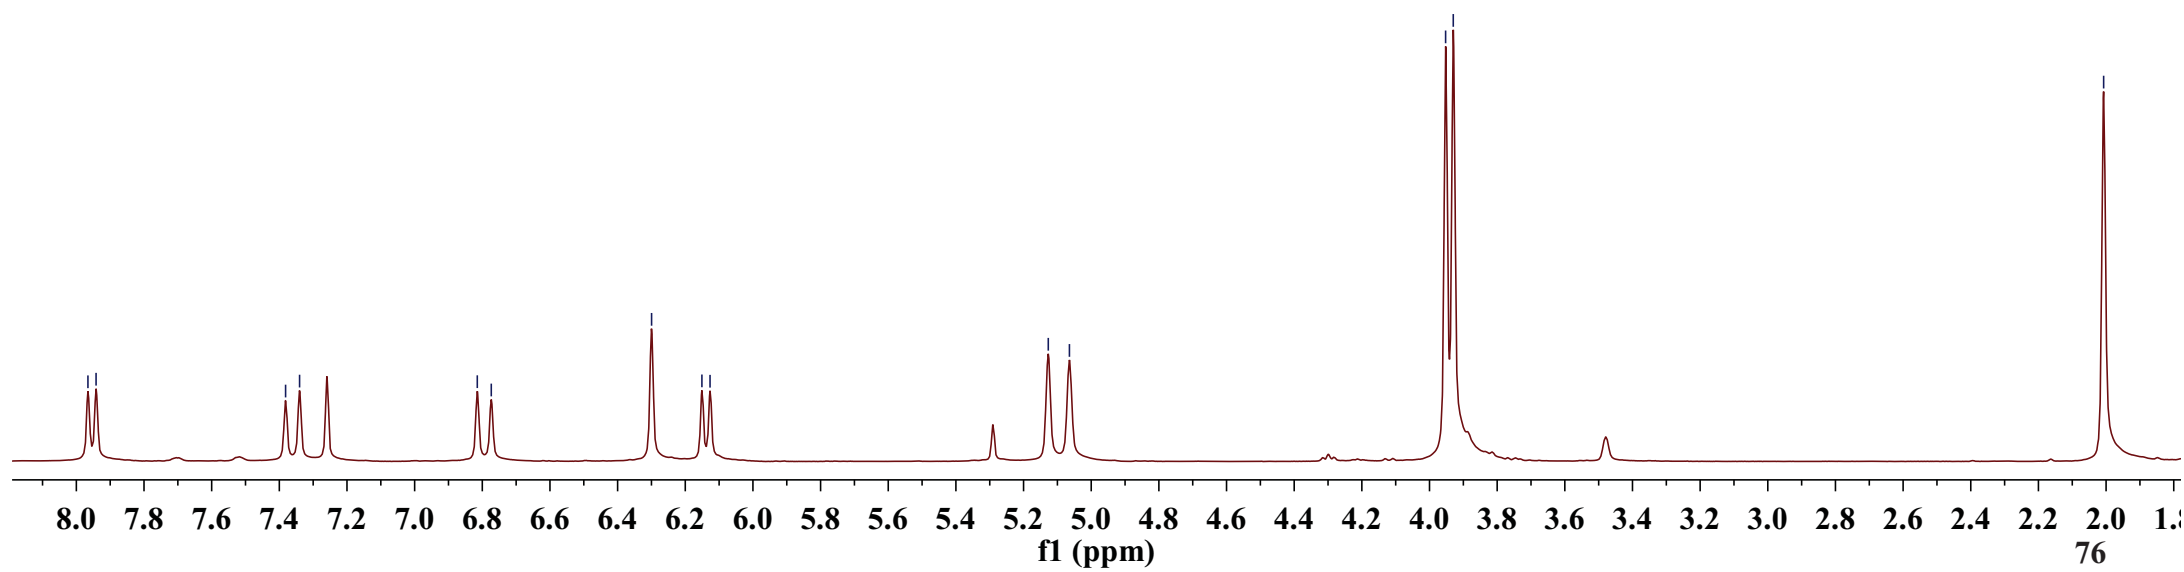

## S6.2. <sup>13</sup>C NMR and DEPT spectra of compound 8

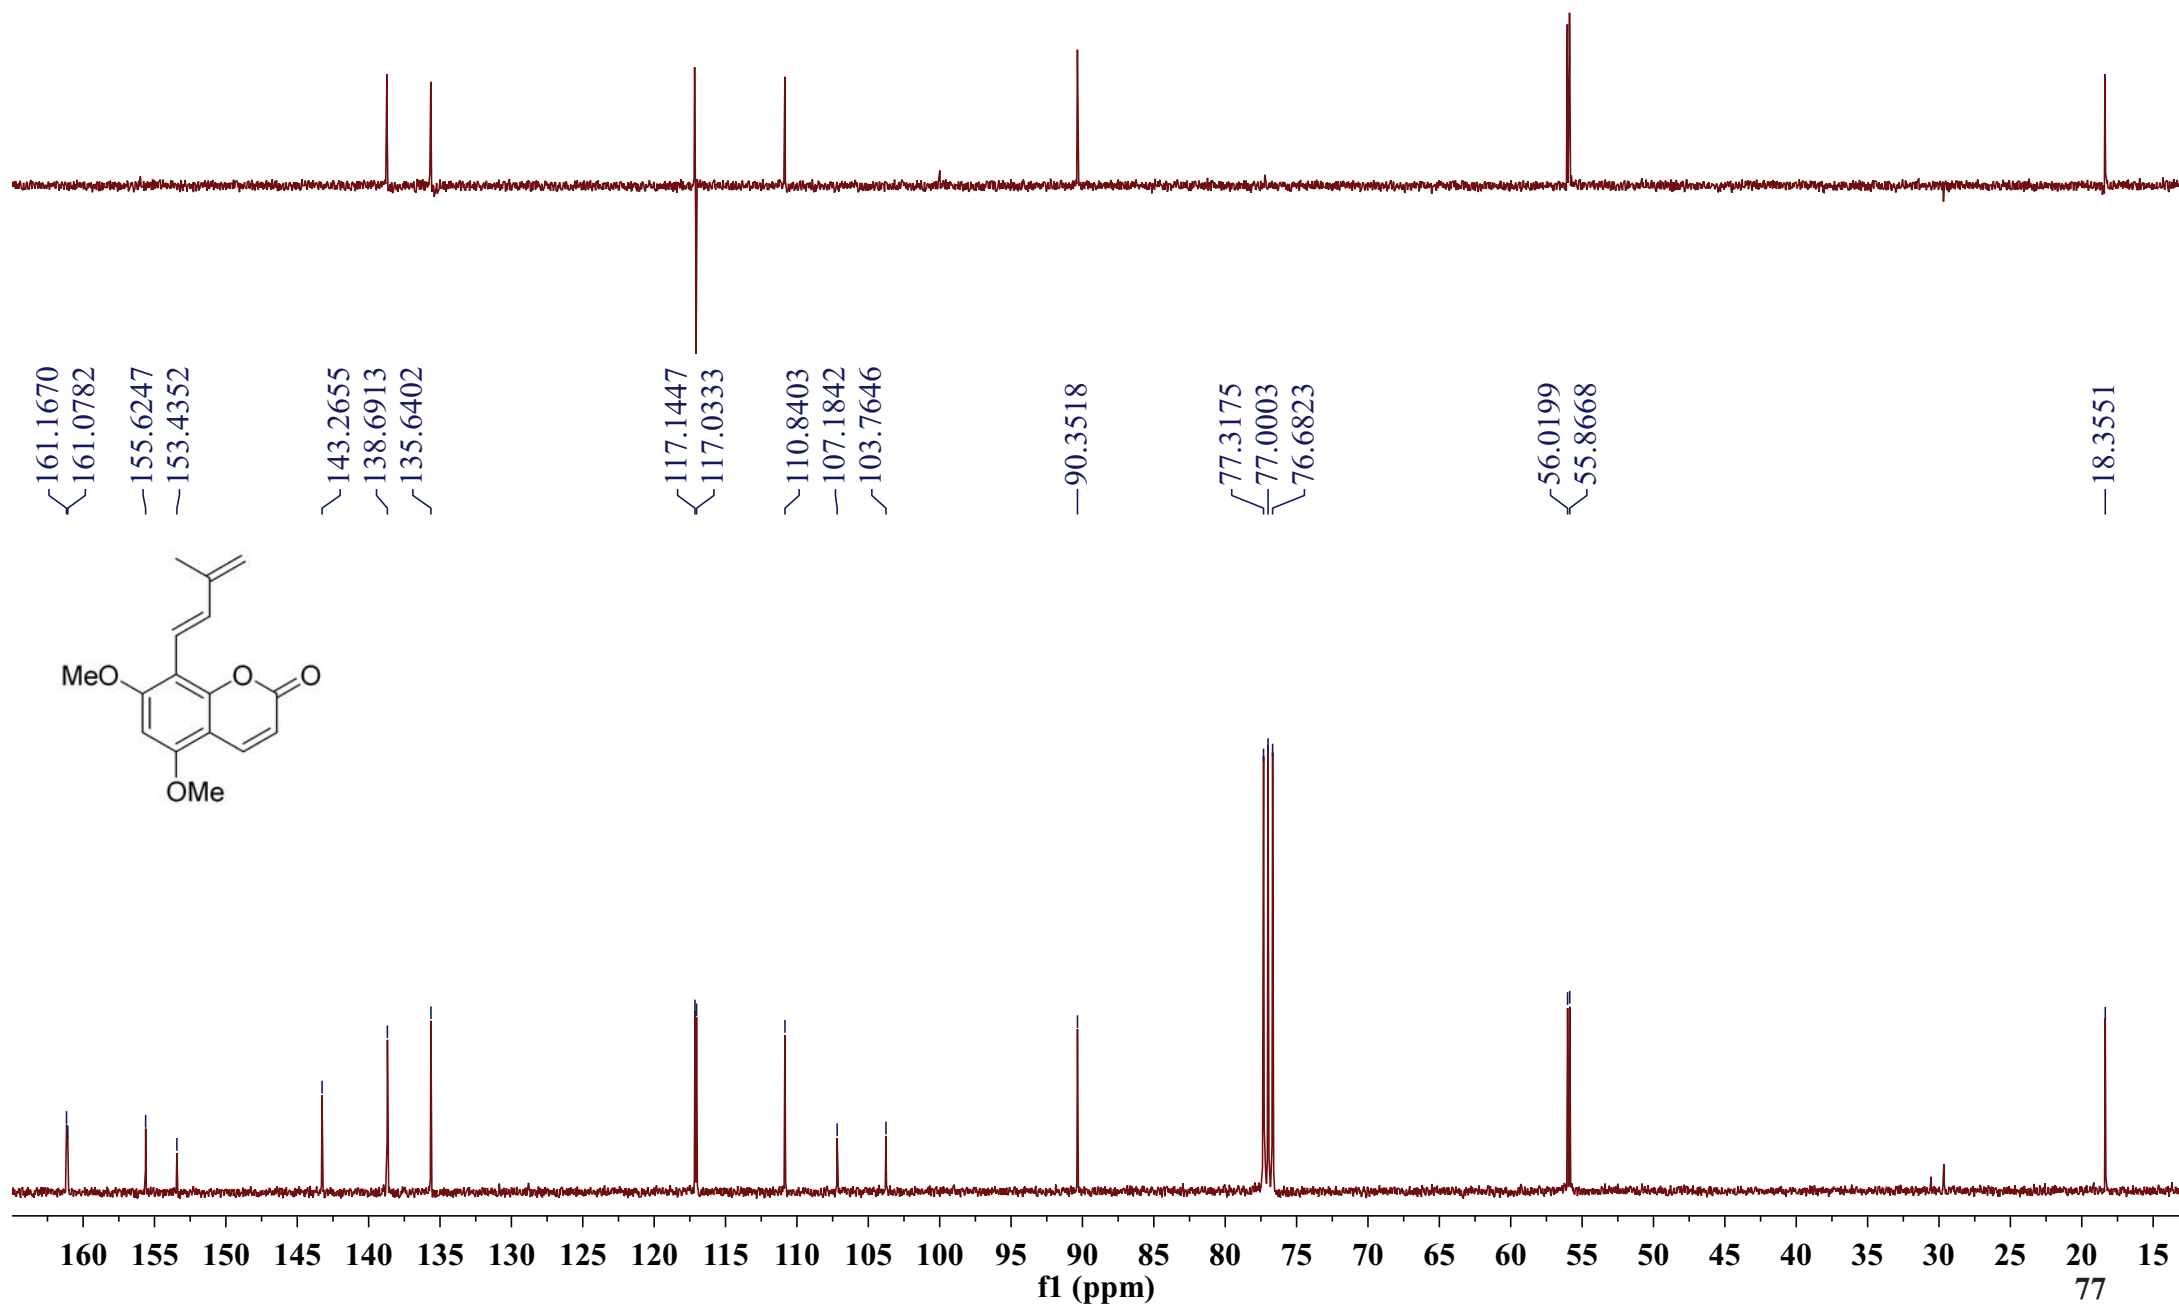

S6.3. <sup>1</sup>H NMR spectrum of compound 9

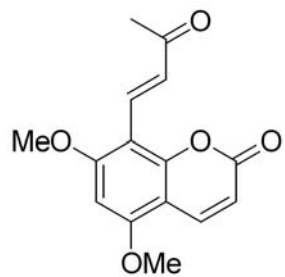

7.9797  
7.9555  
7.9371  
7.8957

7.2467  
7.2053

6.3200  
6.1944  
6.1702

3.9916  
3.9817

2.3954

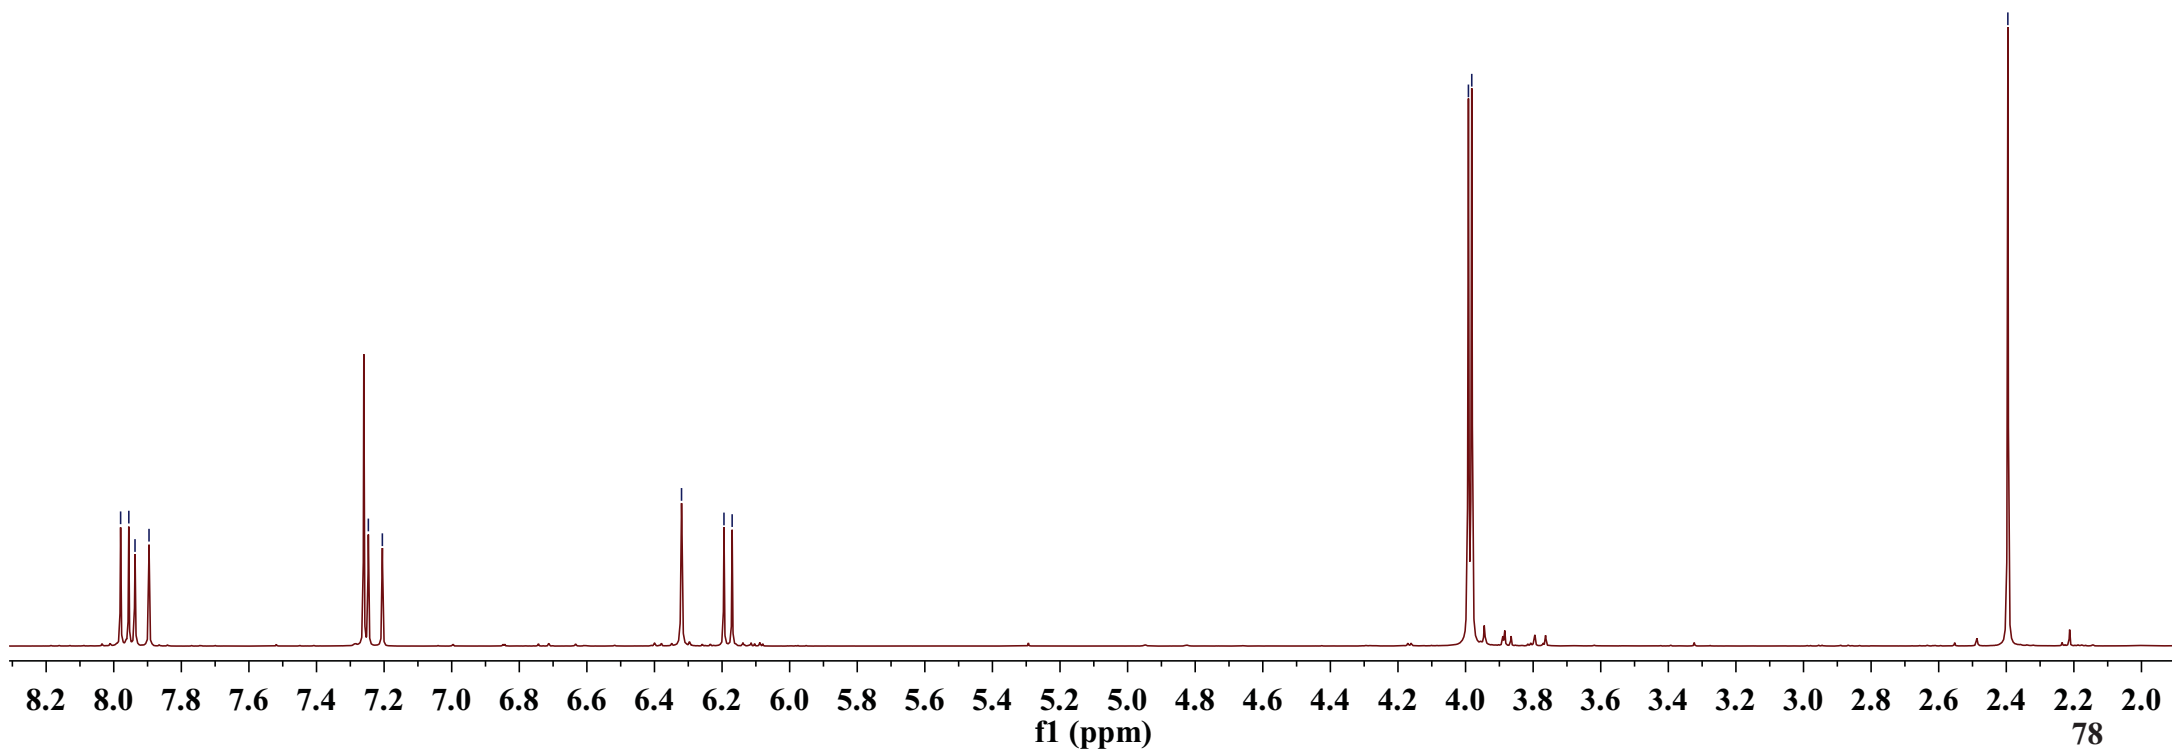

S6.4.  $^{13}\text{C}$  NMR spectrum of compound **9**

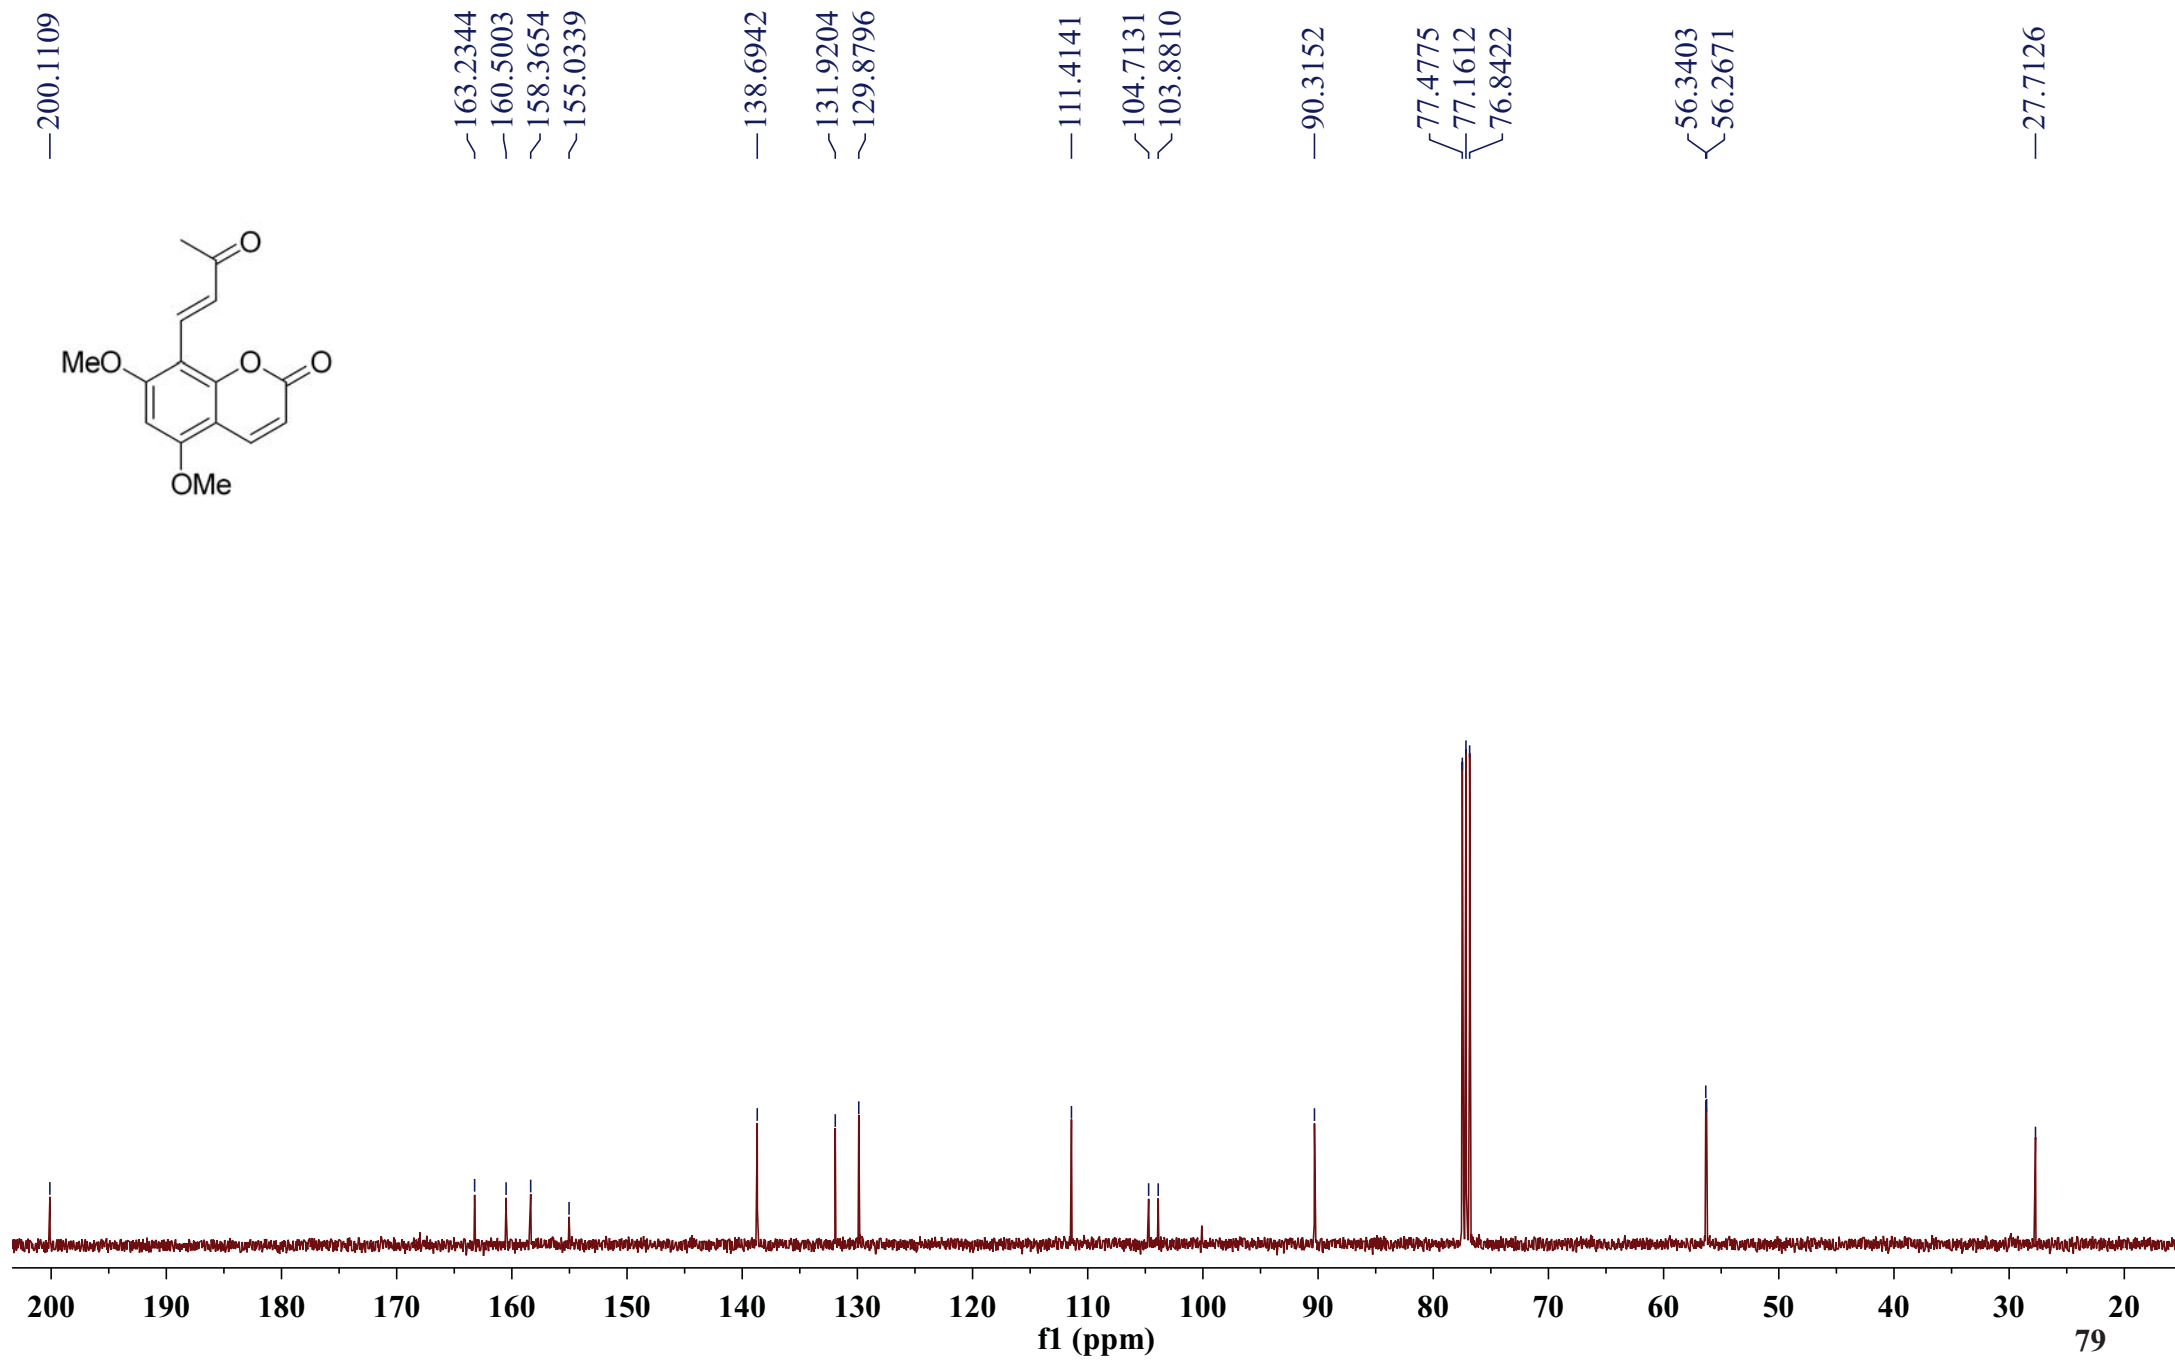

S6.5. <sup>1</sup>H NMR spectrum of compound 10

7.9535  
7.9292

6.3135  
6.1310  
6.1068

5.5849  
5.5662  
5.5477

5.0561  
5.0419  
5.0243

4.5941  
4.5760

3.9352  
3.8934

2.0126

1.6521  
1.5686

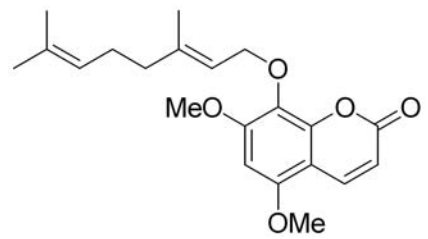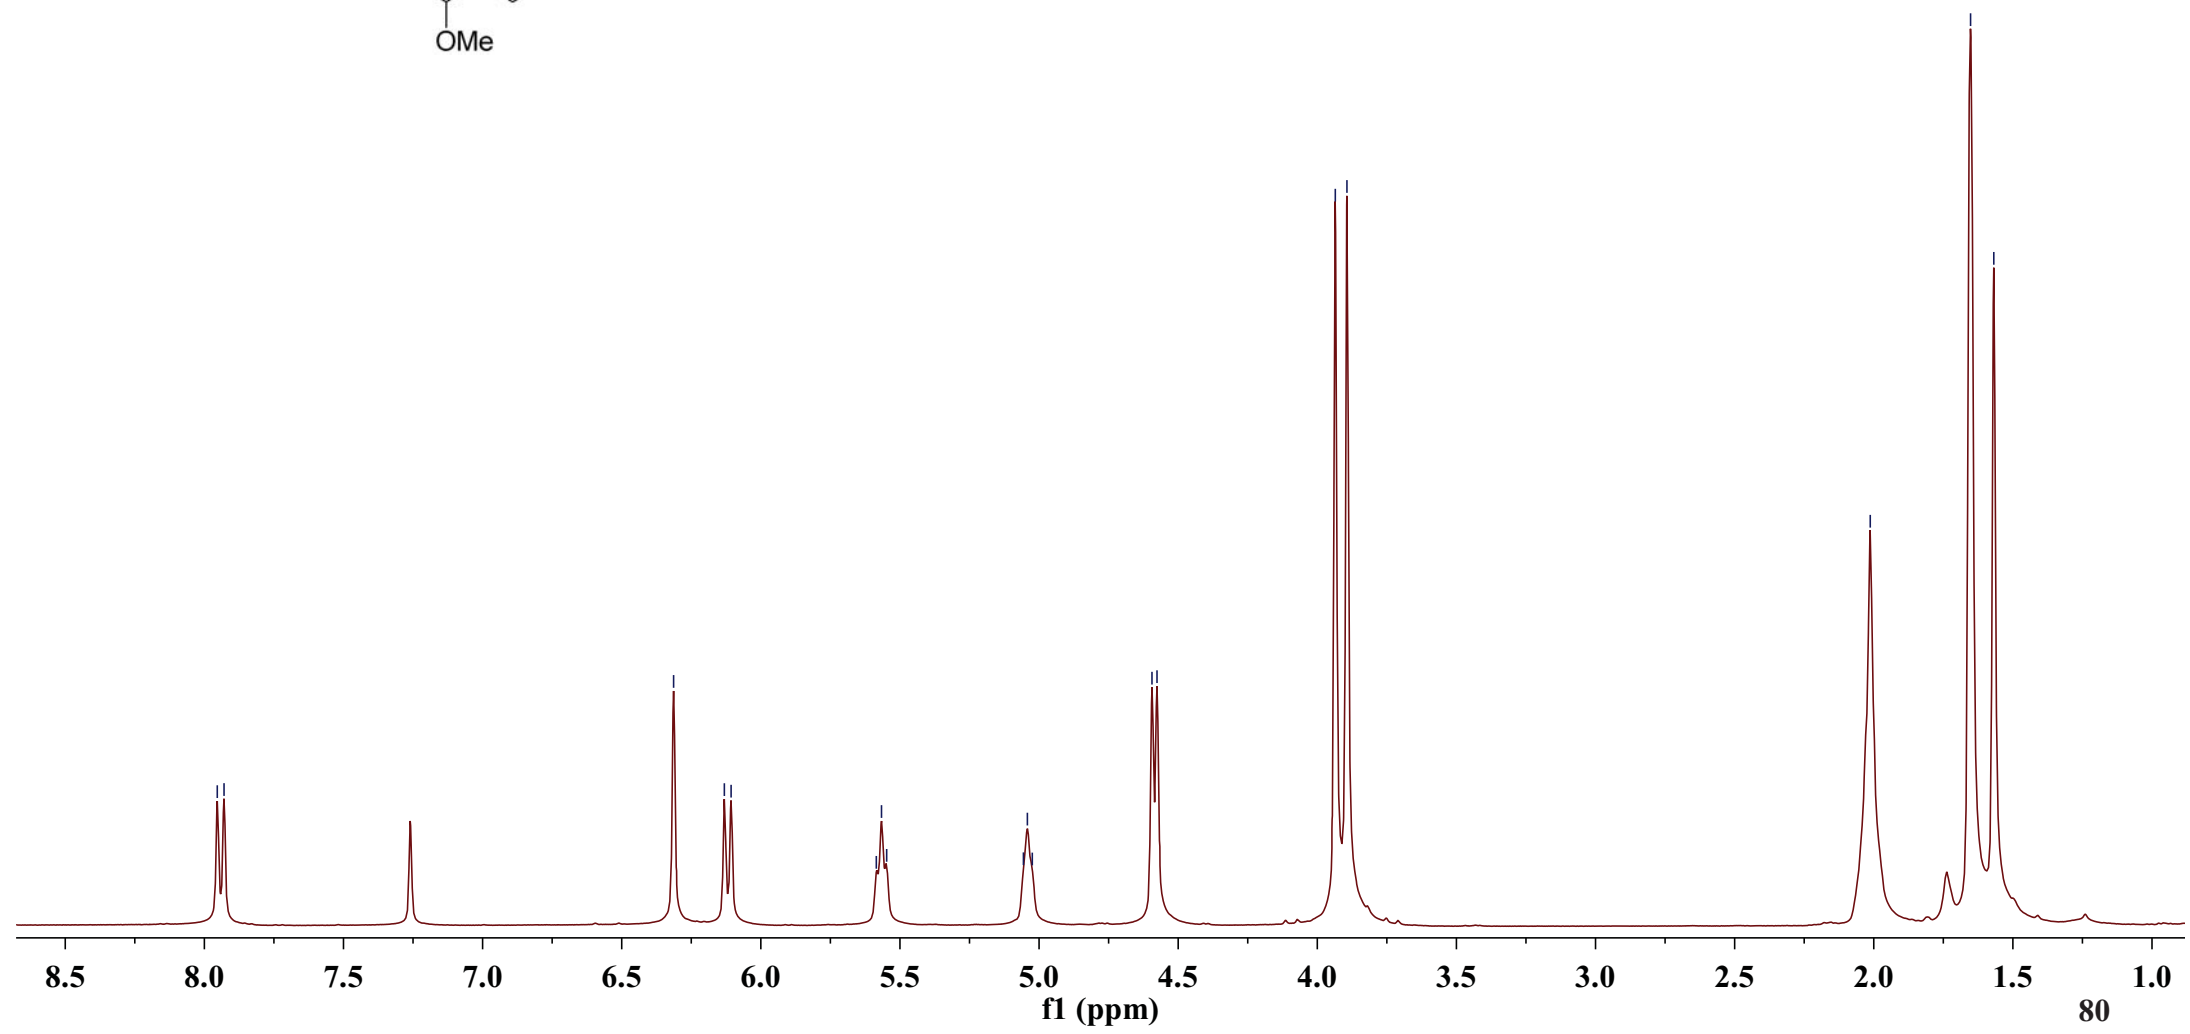



### S6.6. <sup>13</sup>C NMR and DEPT spectra of compound 10

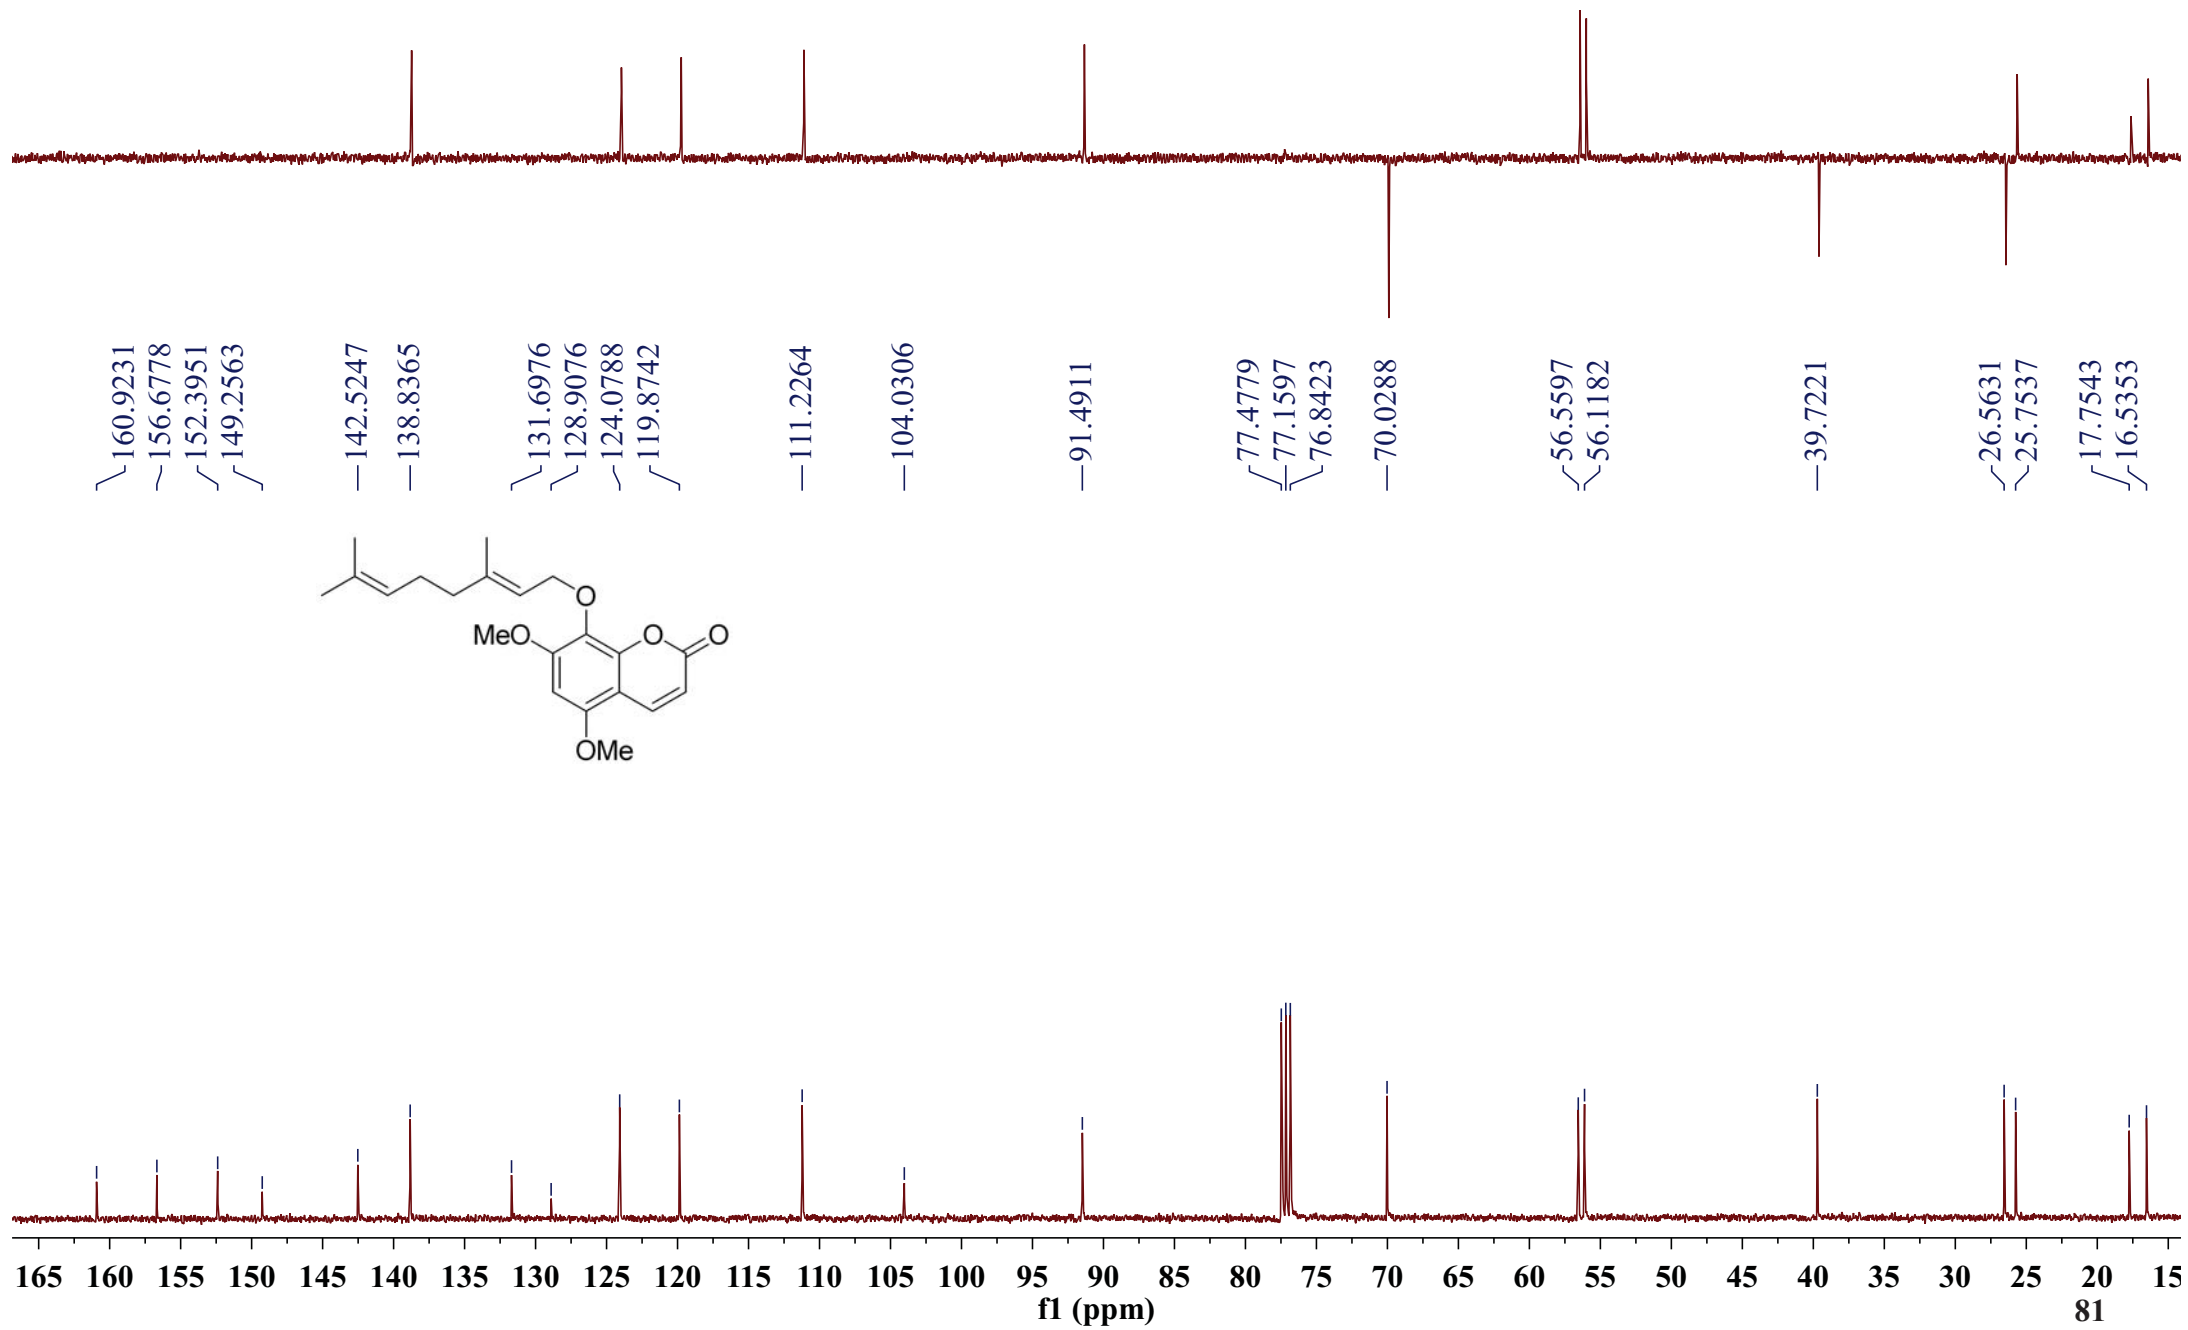

S6.7. <sup>1</sup>H NMR spectrum of compound 11

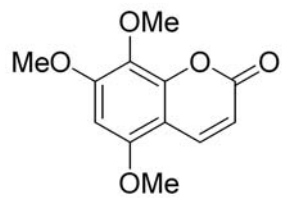

7.9877  
7.9635

7.2598

6.3369  
6.1745  
6.1503

3.9648  
3.9141  
3.9080

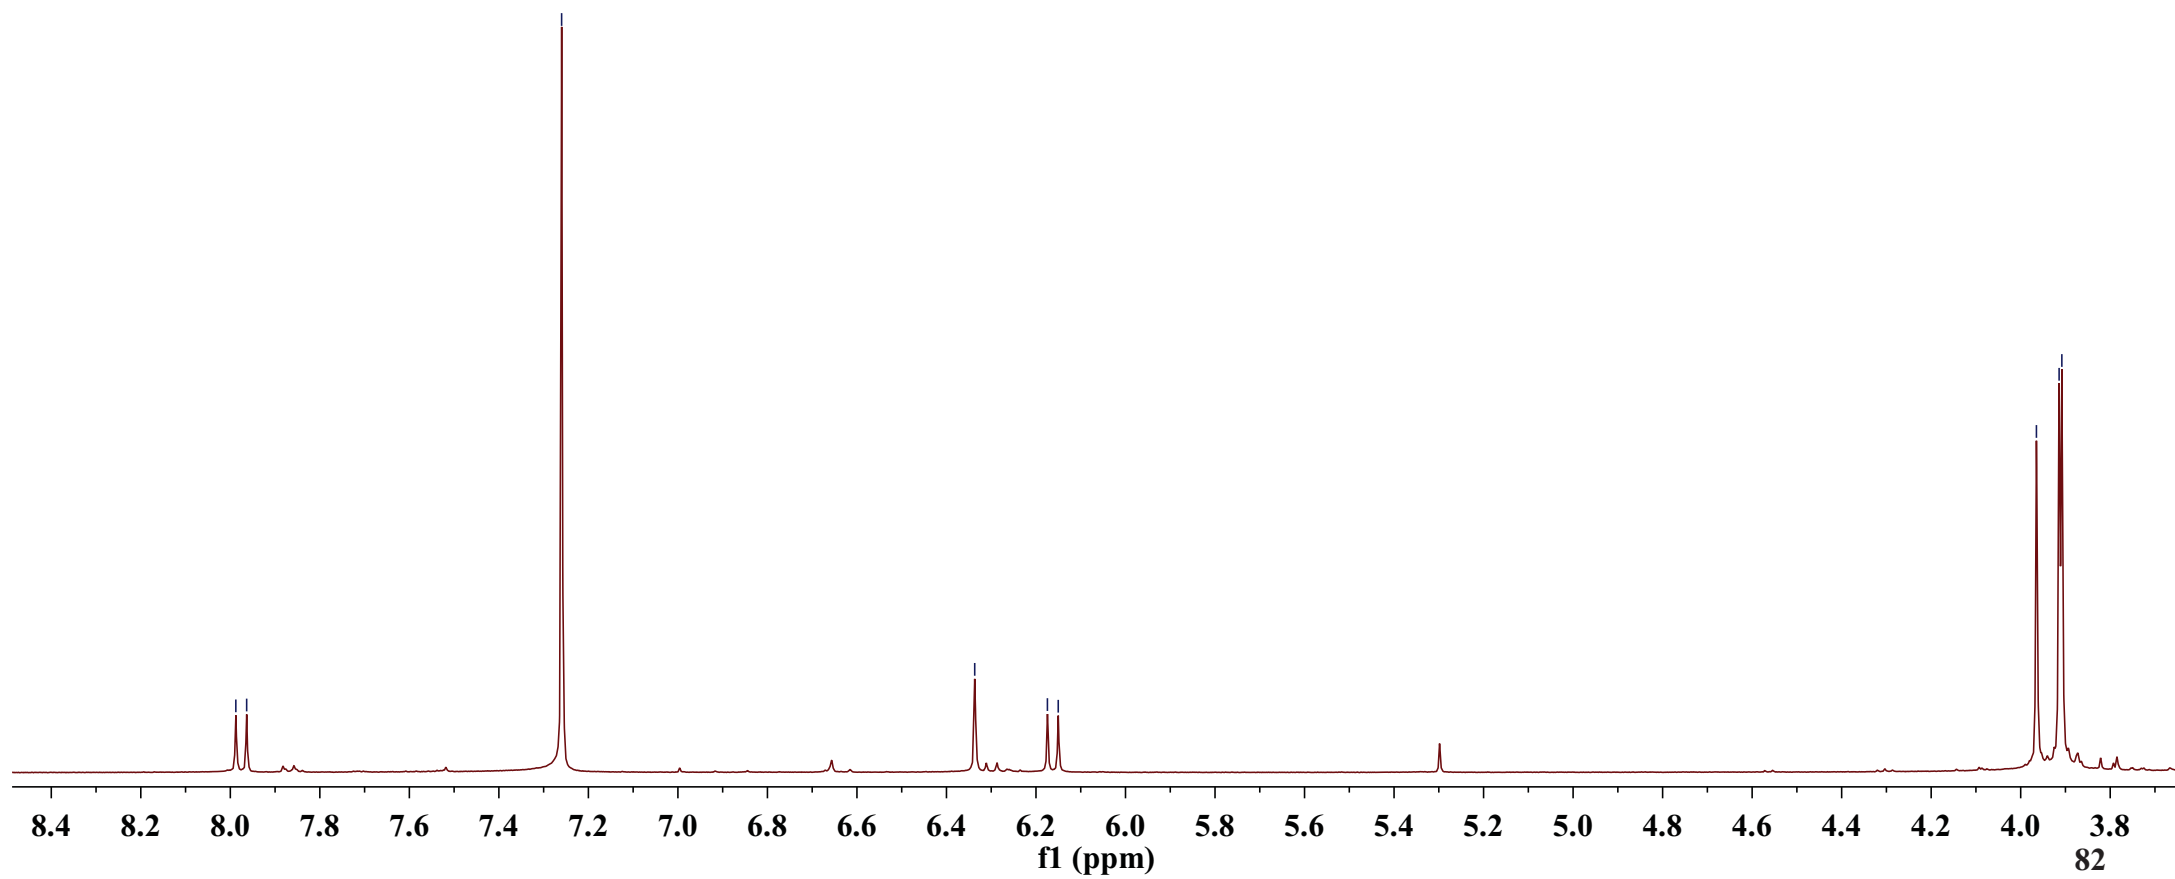

S6.8.  $^{13}\text{C}$  NMR spectrum of compound 11

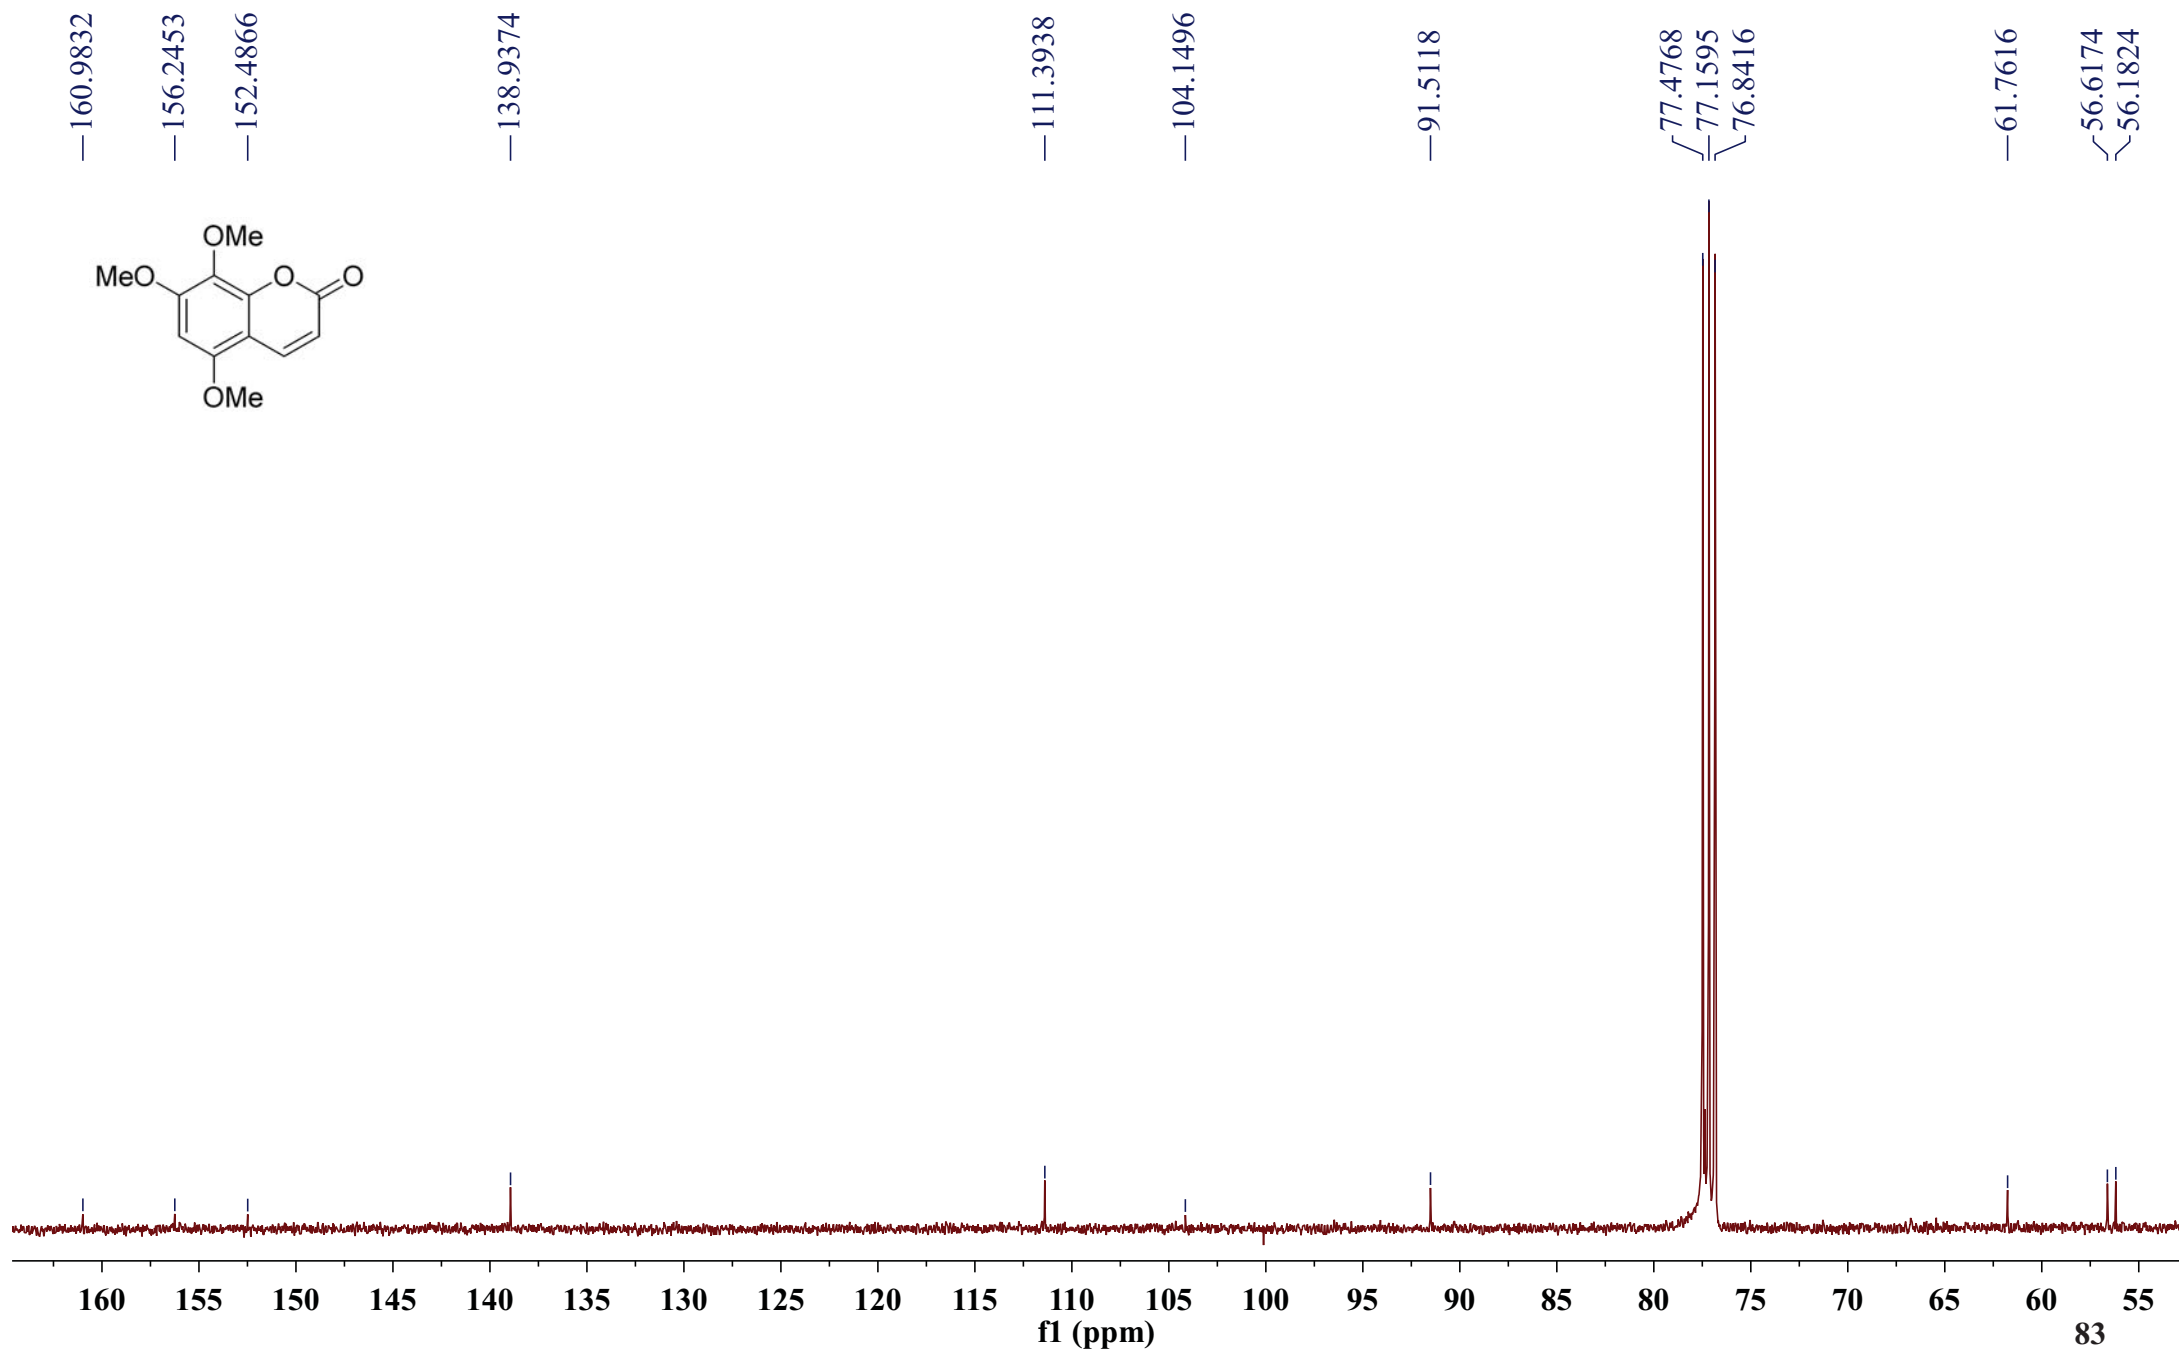

### S6.9. <sup>1</sup>H NMR spectrum of compound 12

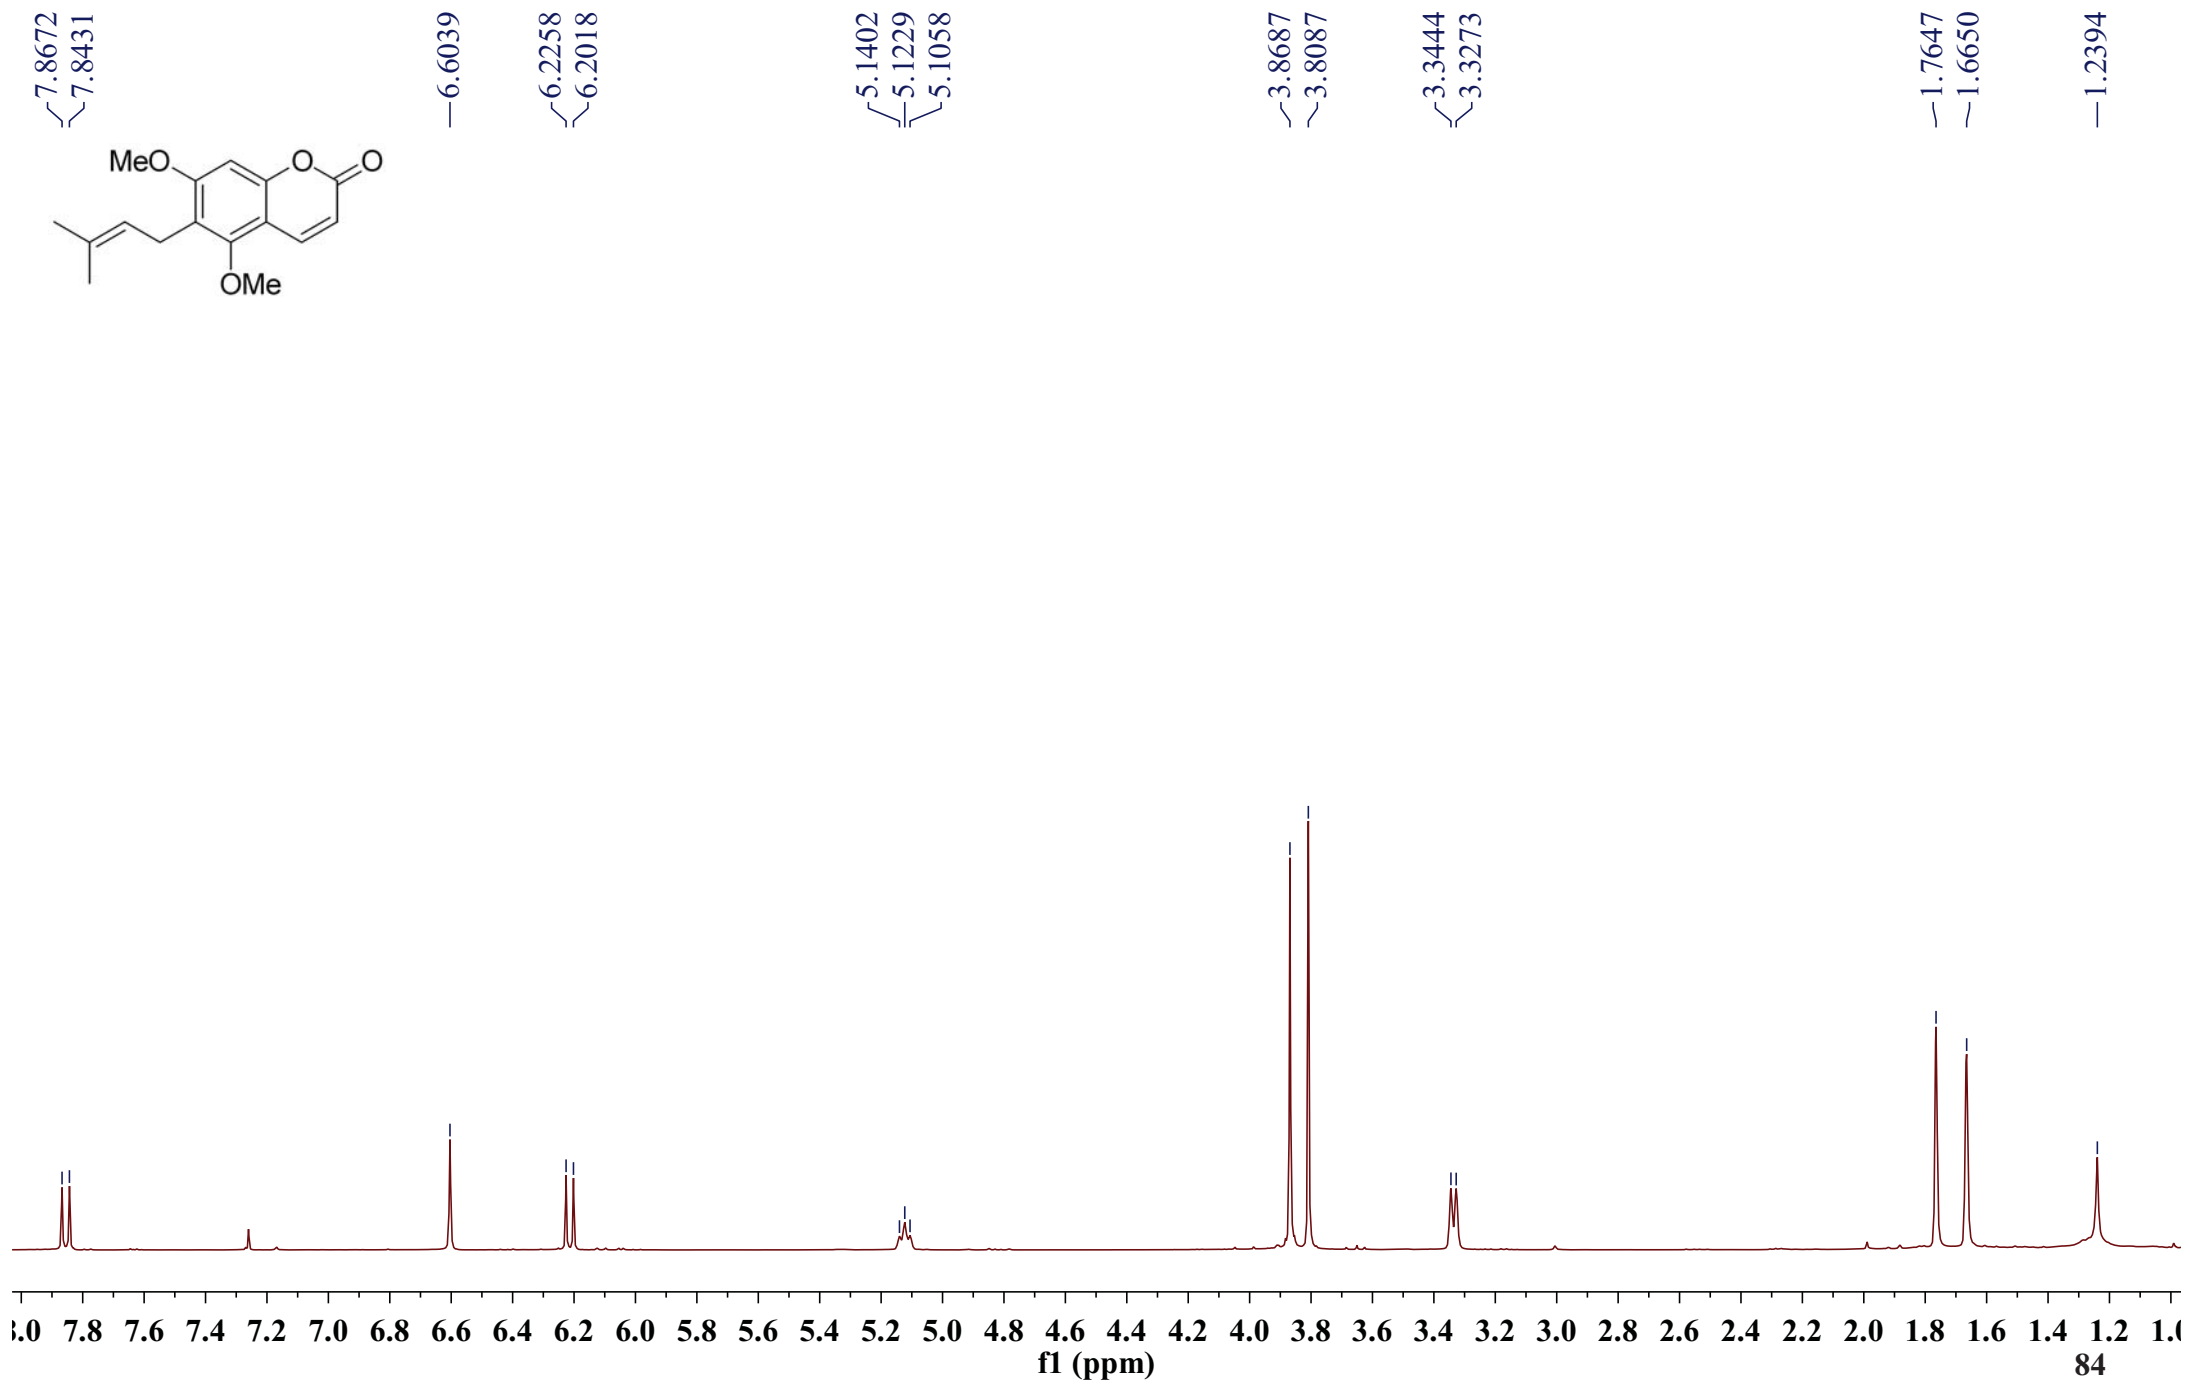

S6.10.  $^{13}\text{C}$  NMR and DEPT spectra of compound **12**

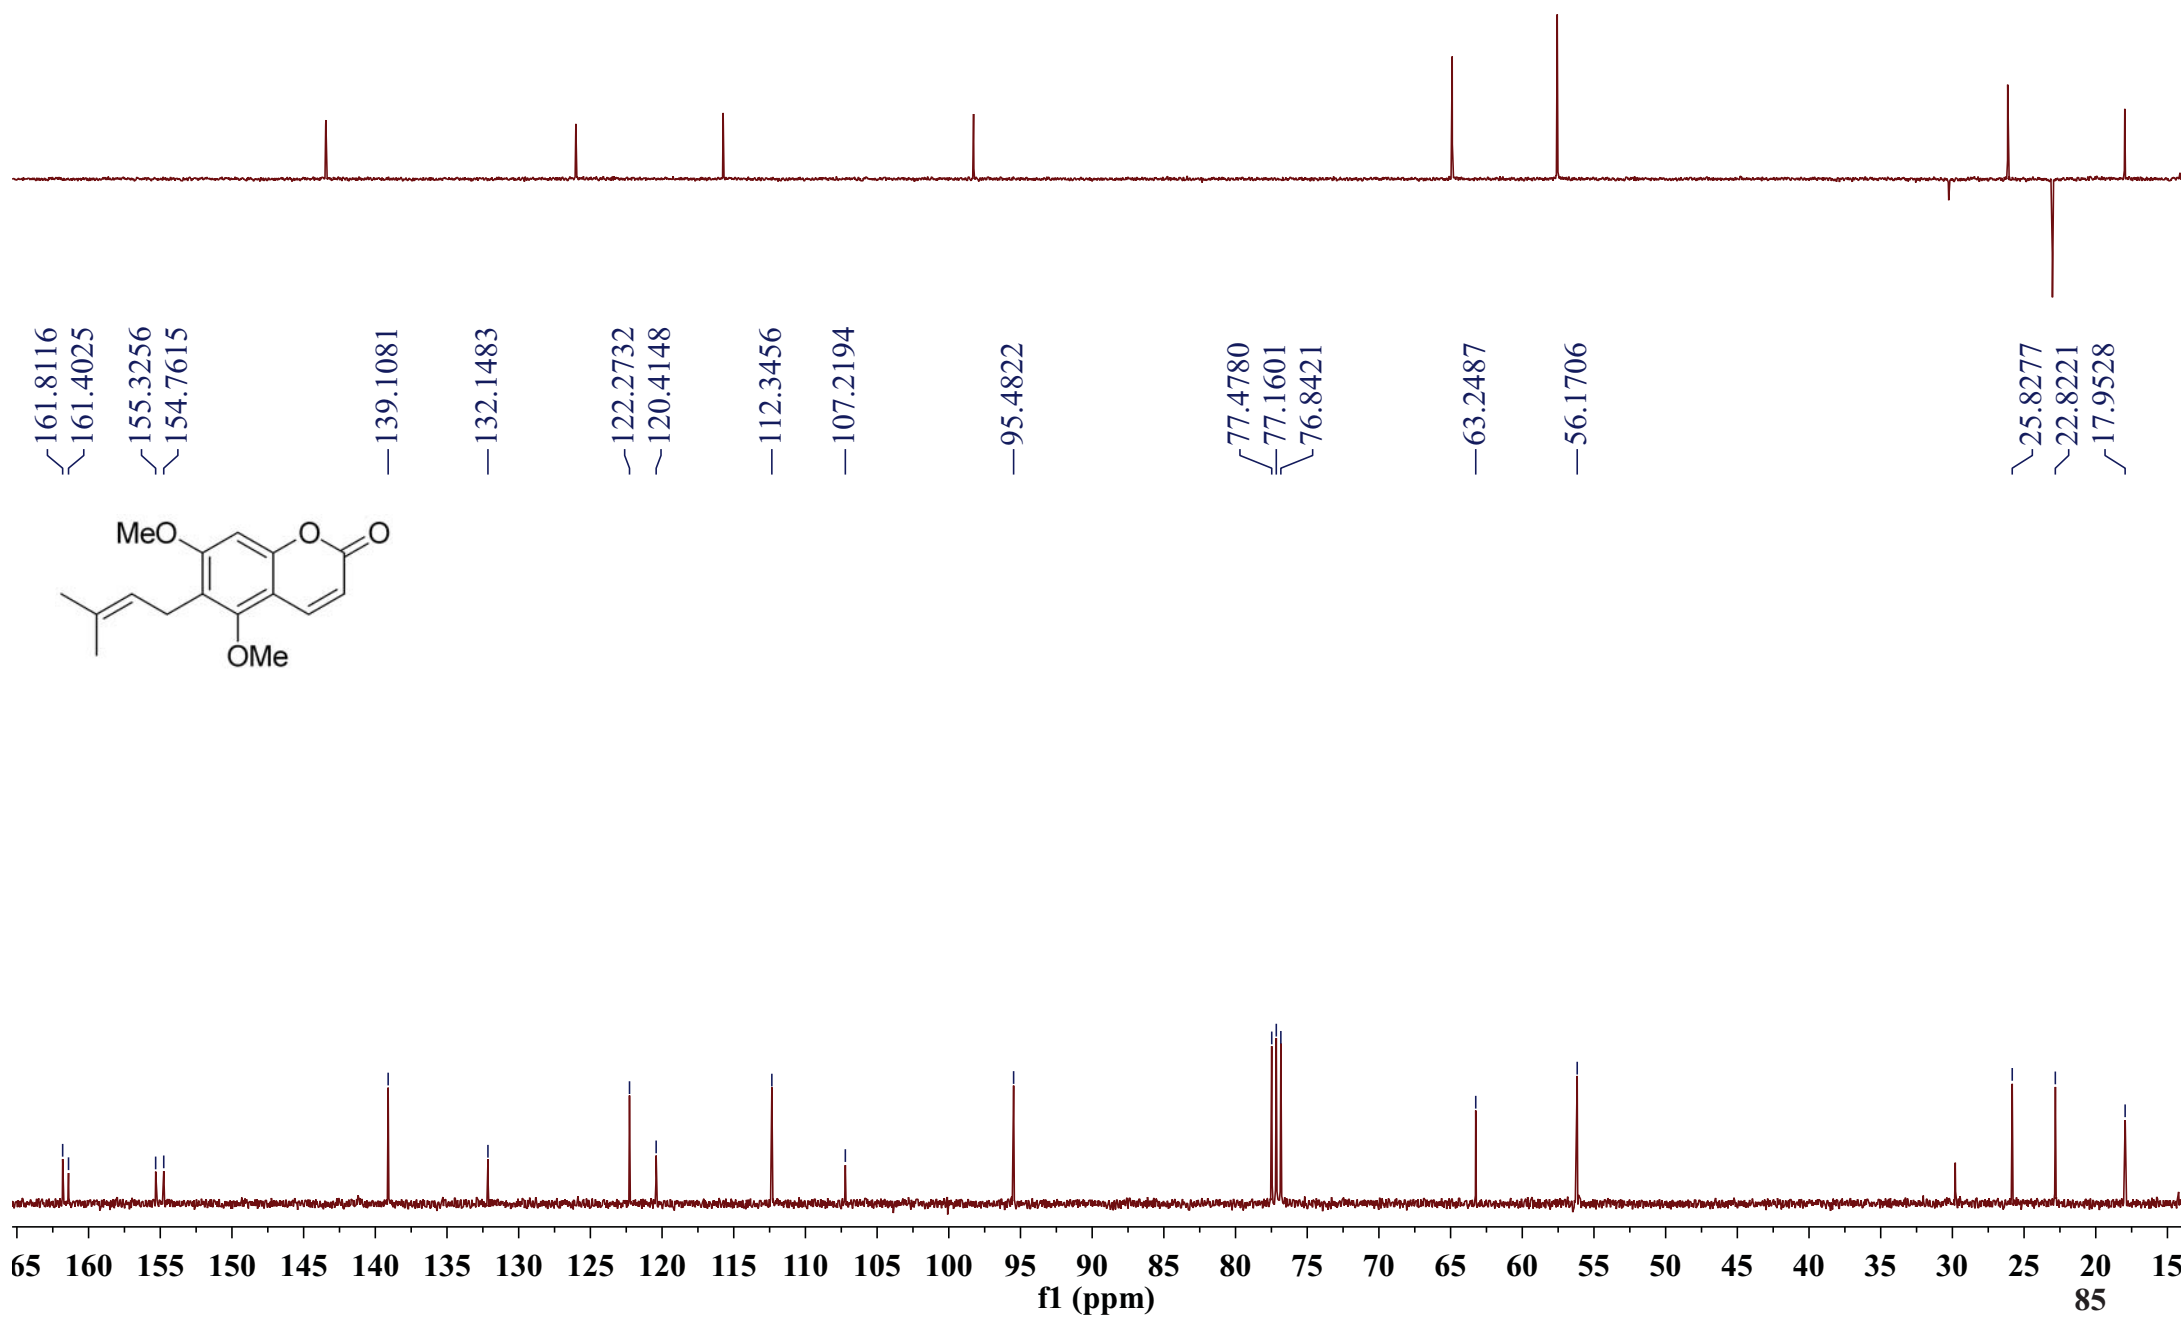

S6.11. <sup>1</sup>H NMR spectrum of compound 13

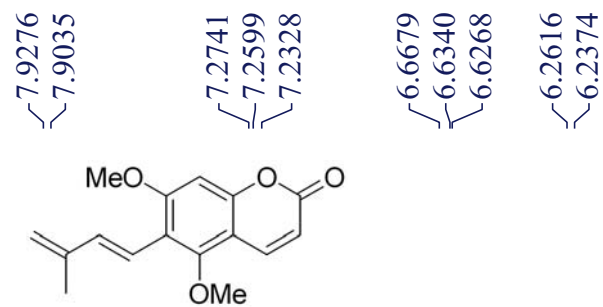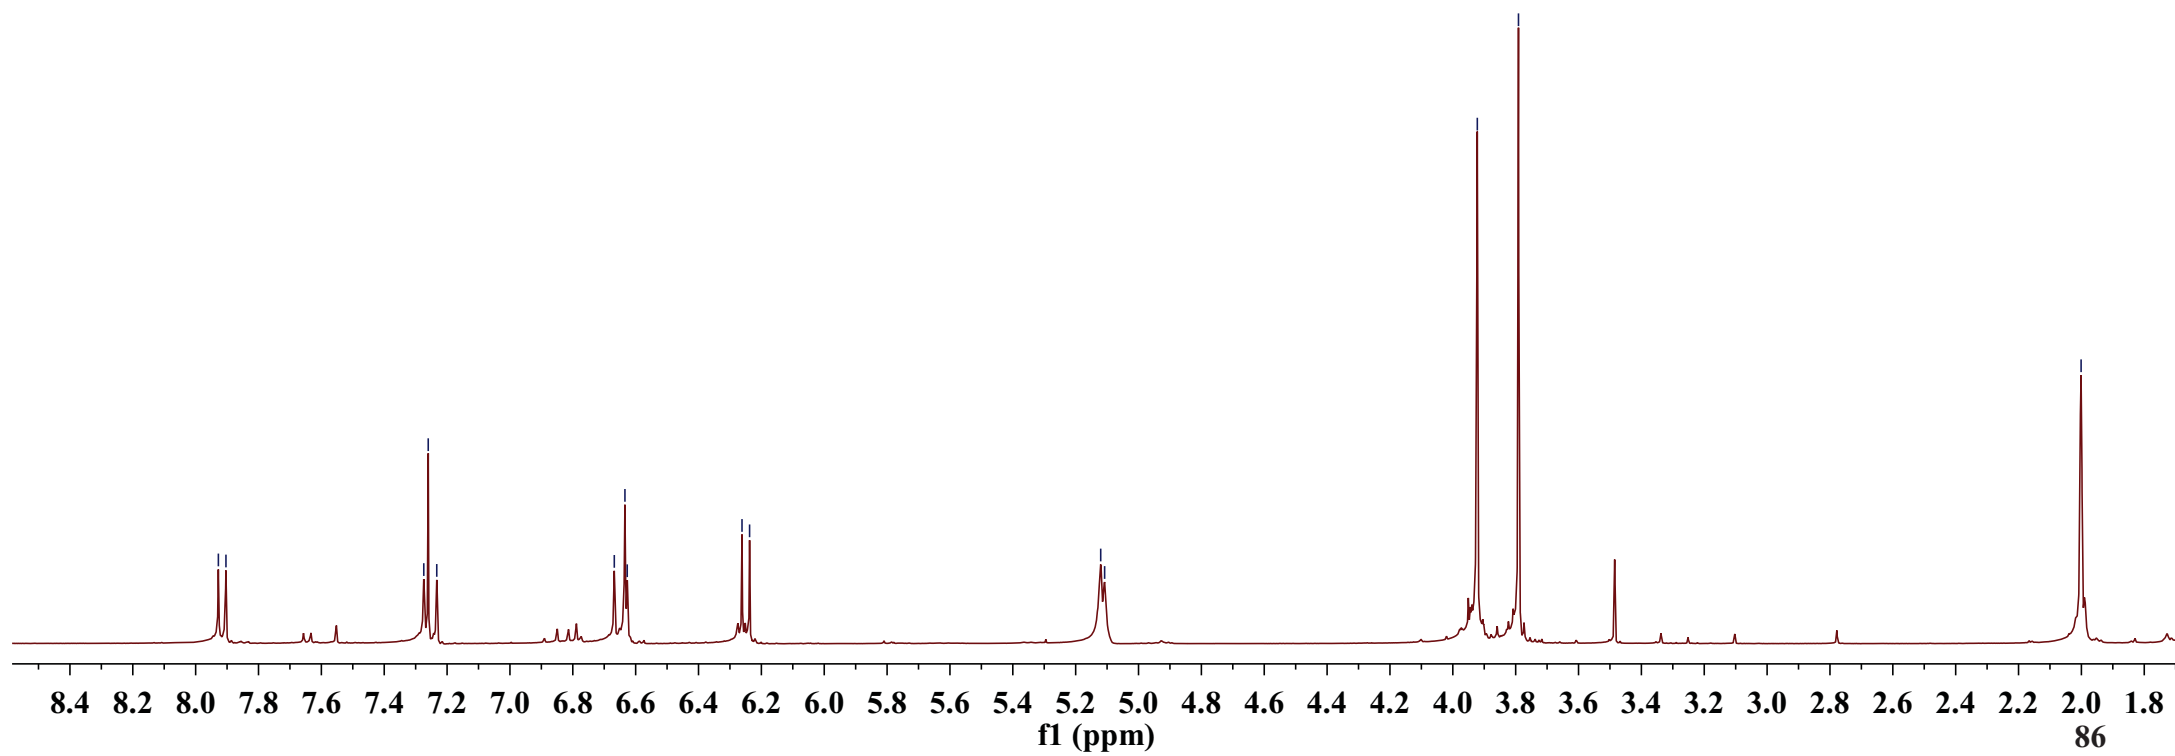

### S6.12. $^{13}\text{C}$ NMR spectrum of compound 13

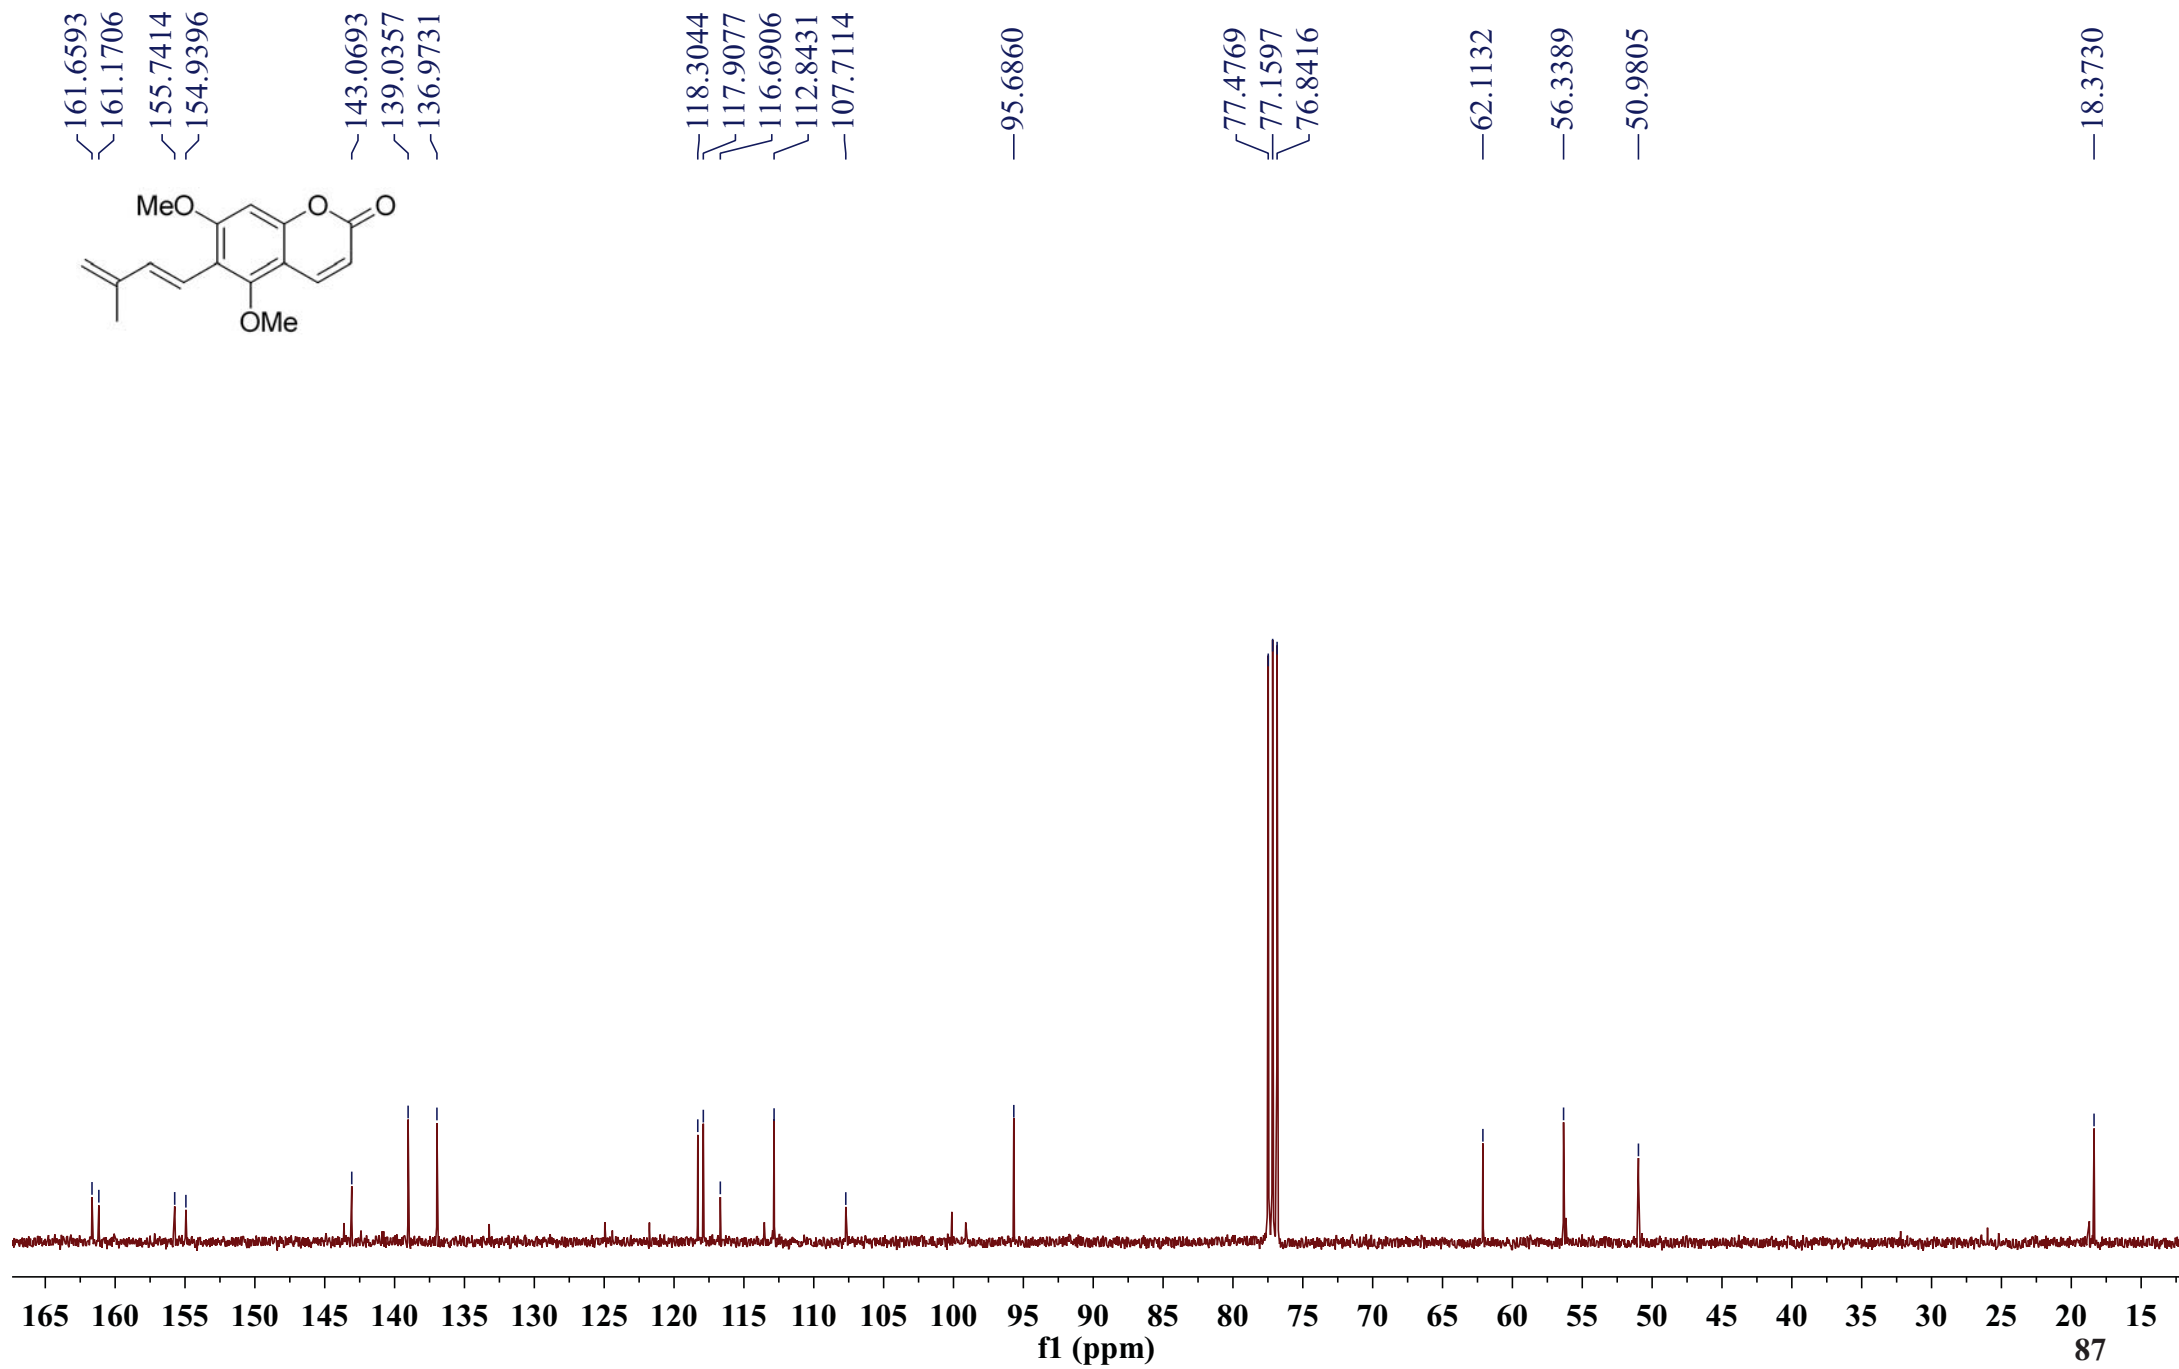

S6.13. <sup>1</sup>H NMR spectrum of compound 14

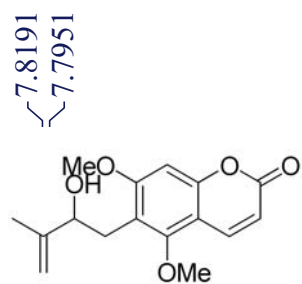

7.8191  
7.7951

6.5780

6.1917  
6.1677

4.8841  
4.7596

4.2640  
4.2537  
4.2427  
4.2319

3.8451  
3.8265

2.9356  
2.9251  
2.9015  
2.8911  
2.8497  
2.8283  
2.8160  
2.7942

1.7886

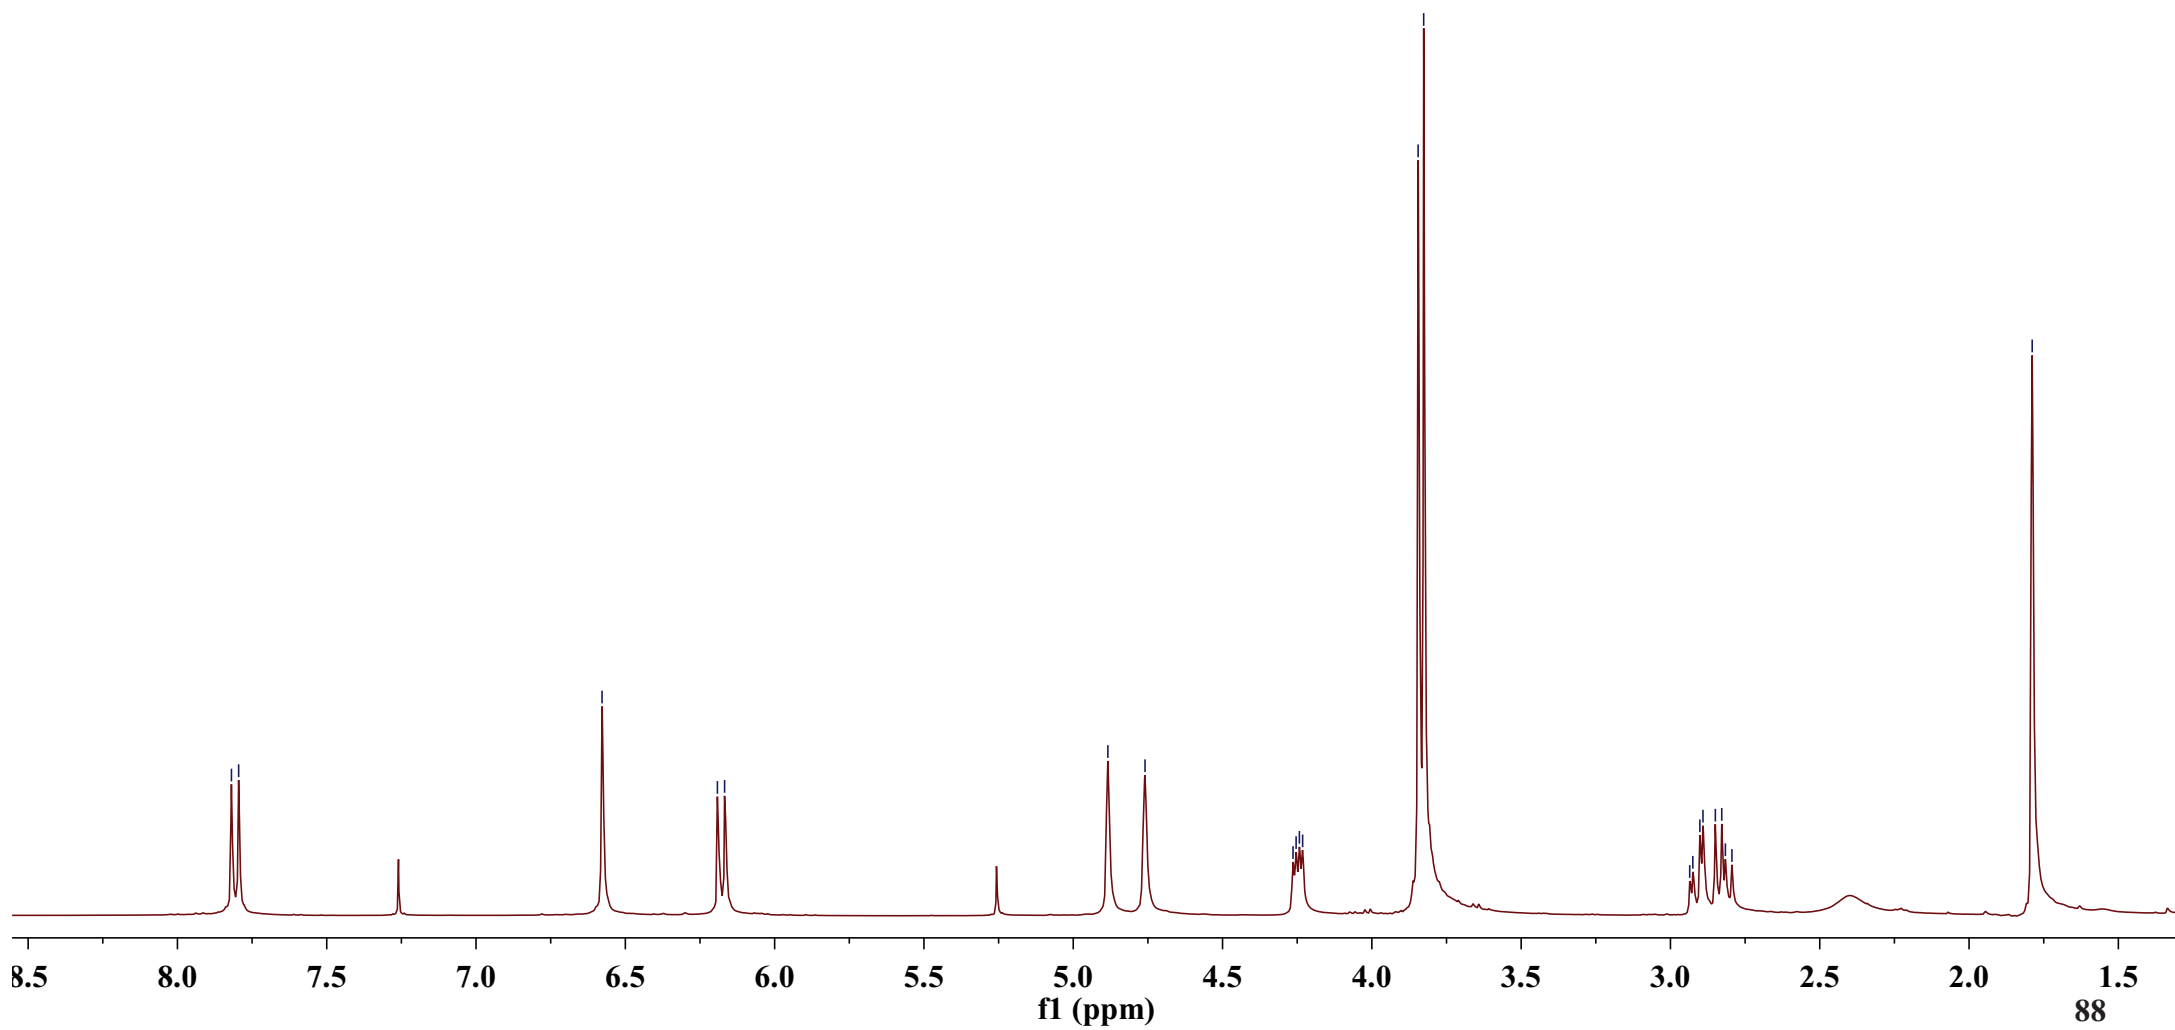



S6.14.  $^{13}\text{C}$  NMR and DEPT spectra of compound 14

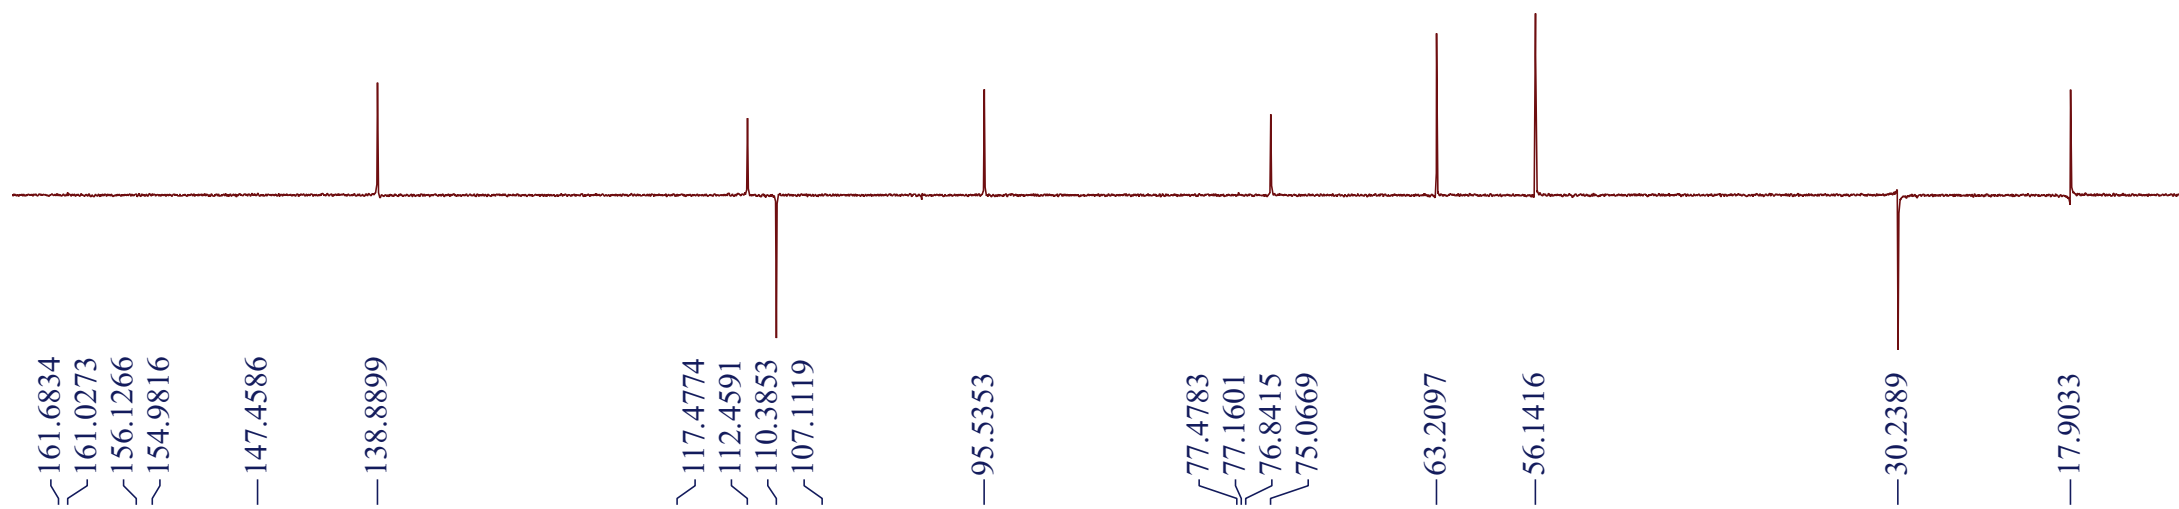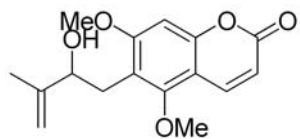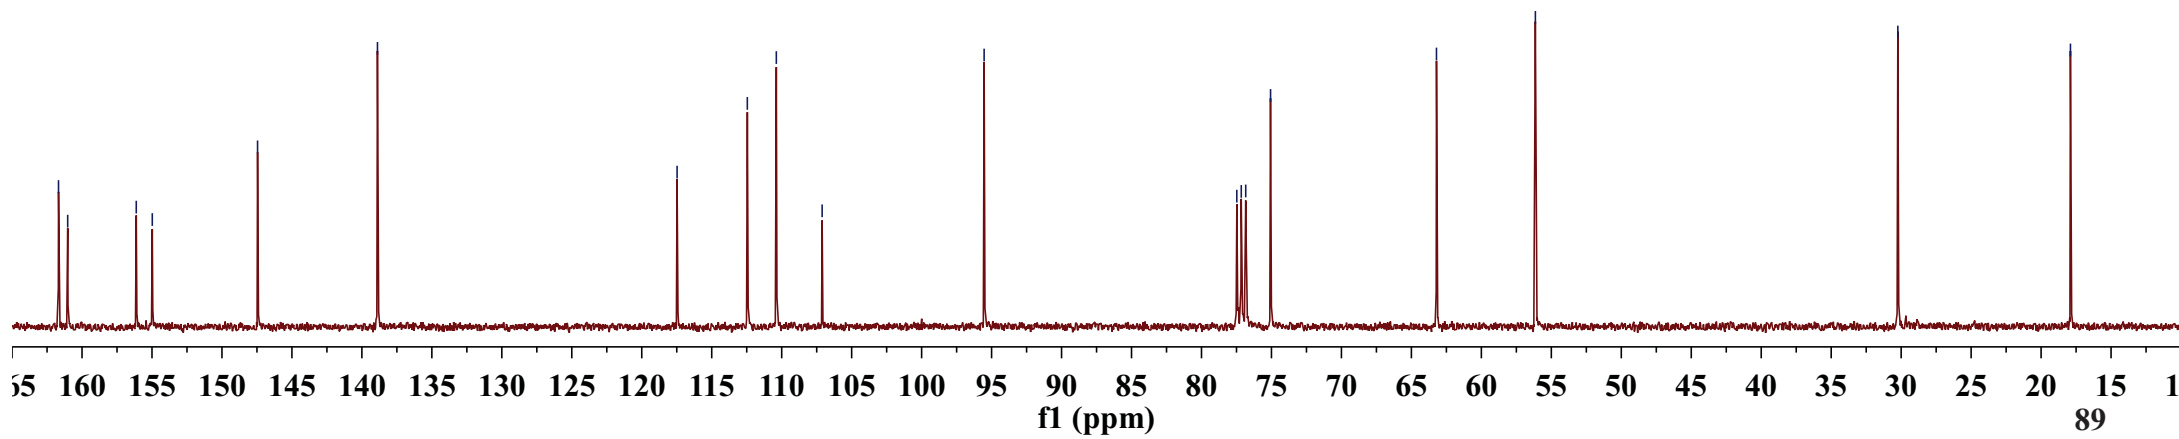

S6.15. <sup>1</sup>H NMR spectrum of compound 15

7.9202  
7.8960  
6.7712  
6.7300  
6.7088  
6.6677  
6.6241  
6.2591  
6.2350  
3.9003  
3.7783  
1.4417

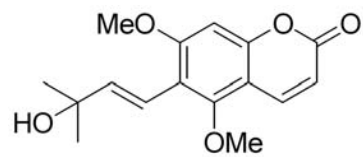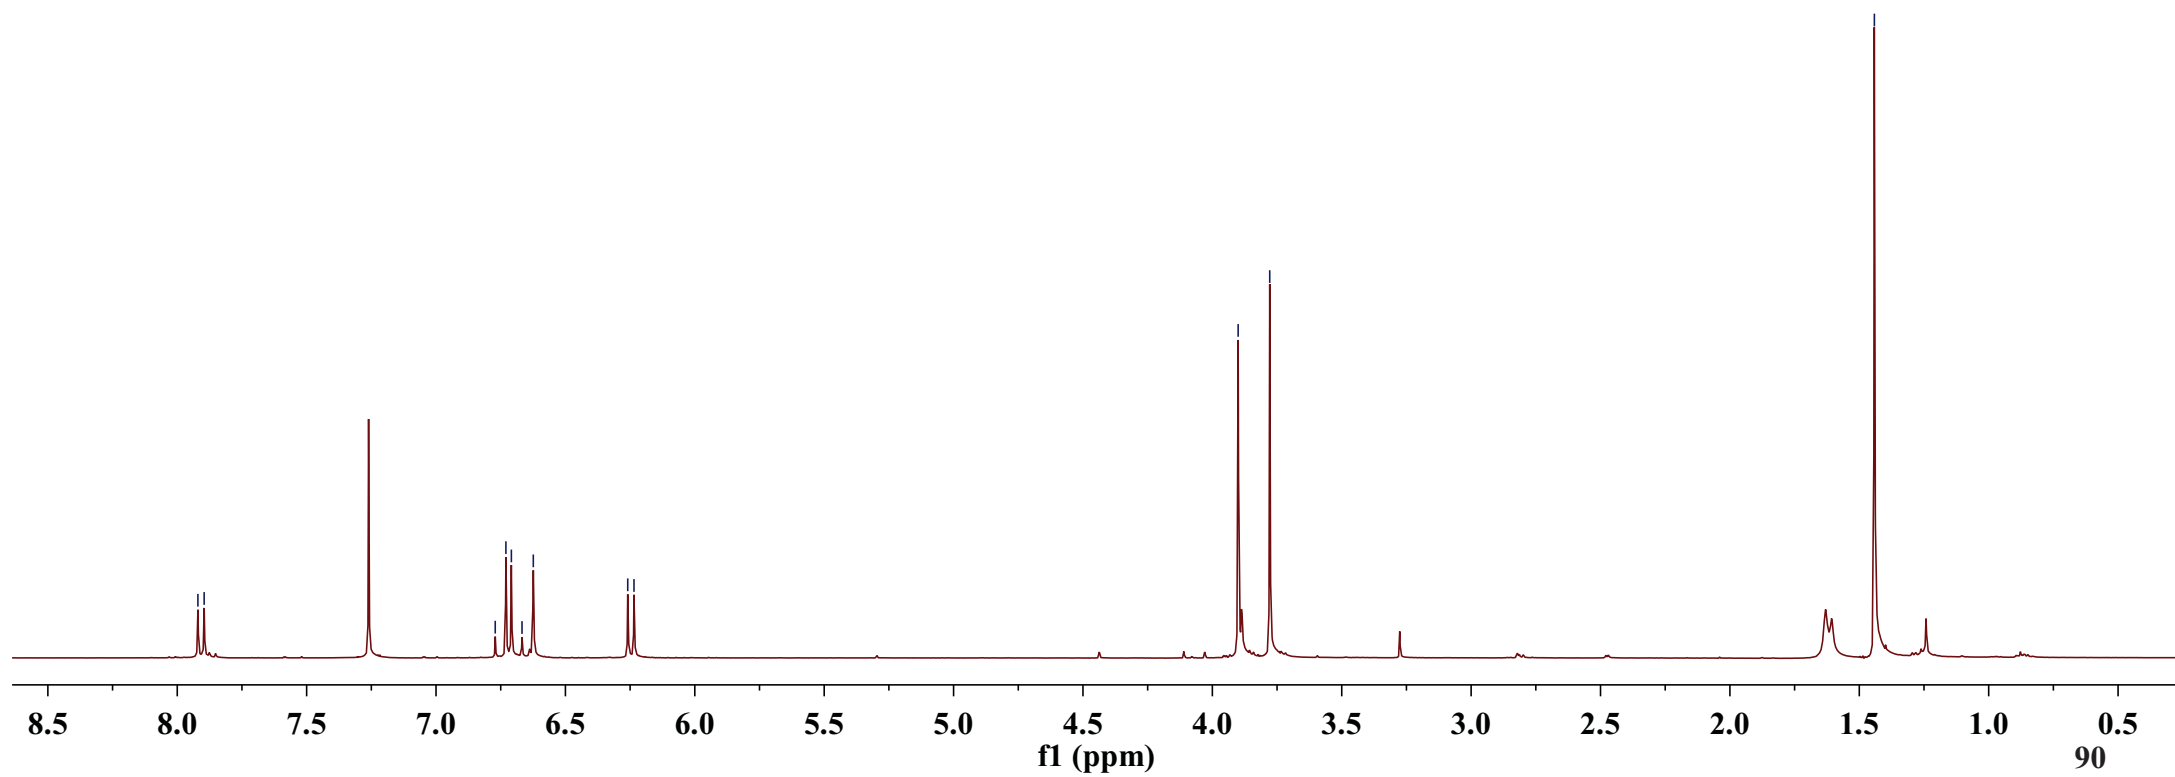

S6.16. <sup>13</sup>C NMR and DEPT spectra of compound 15

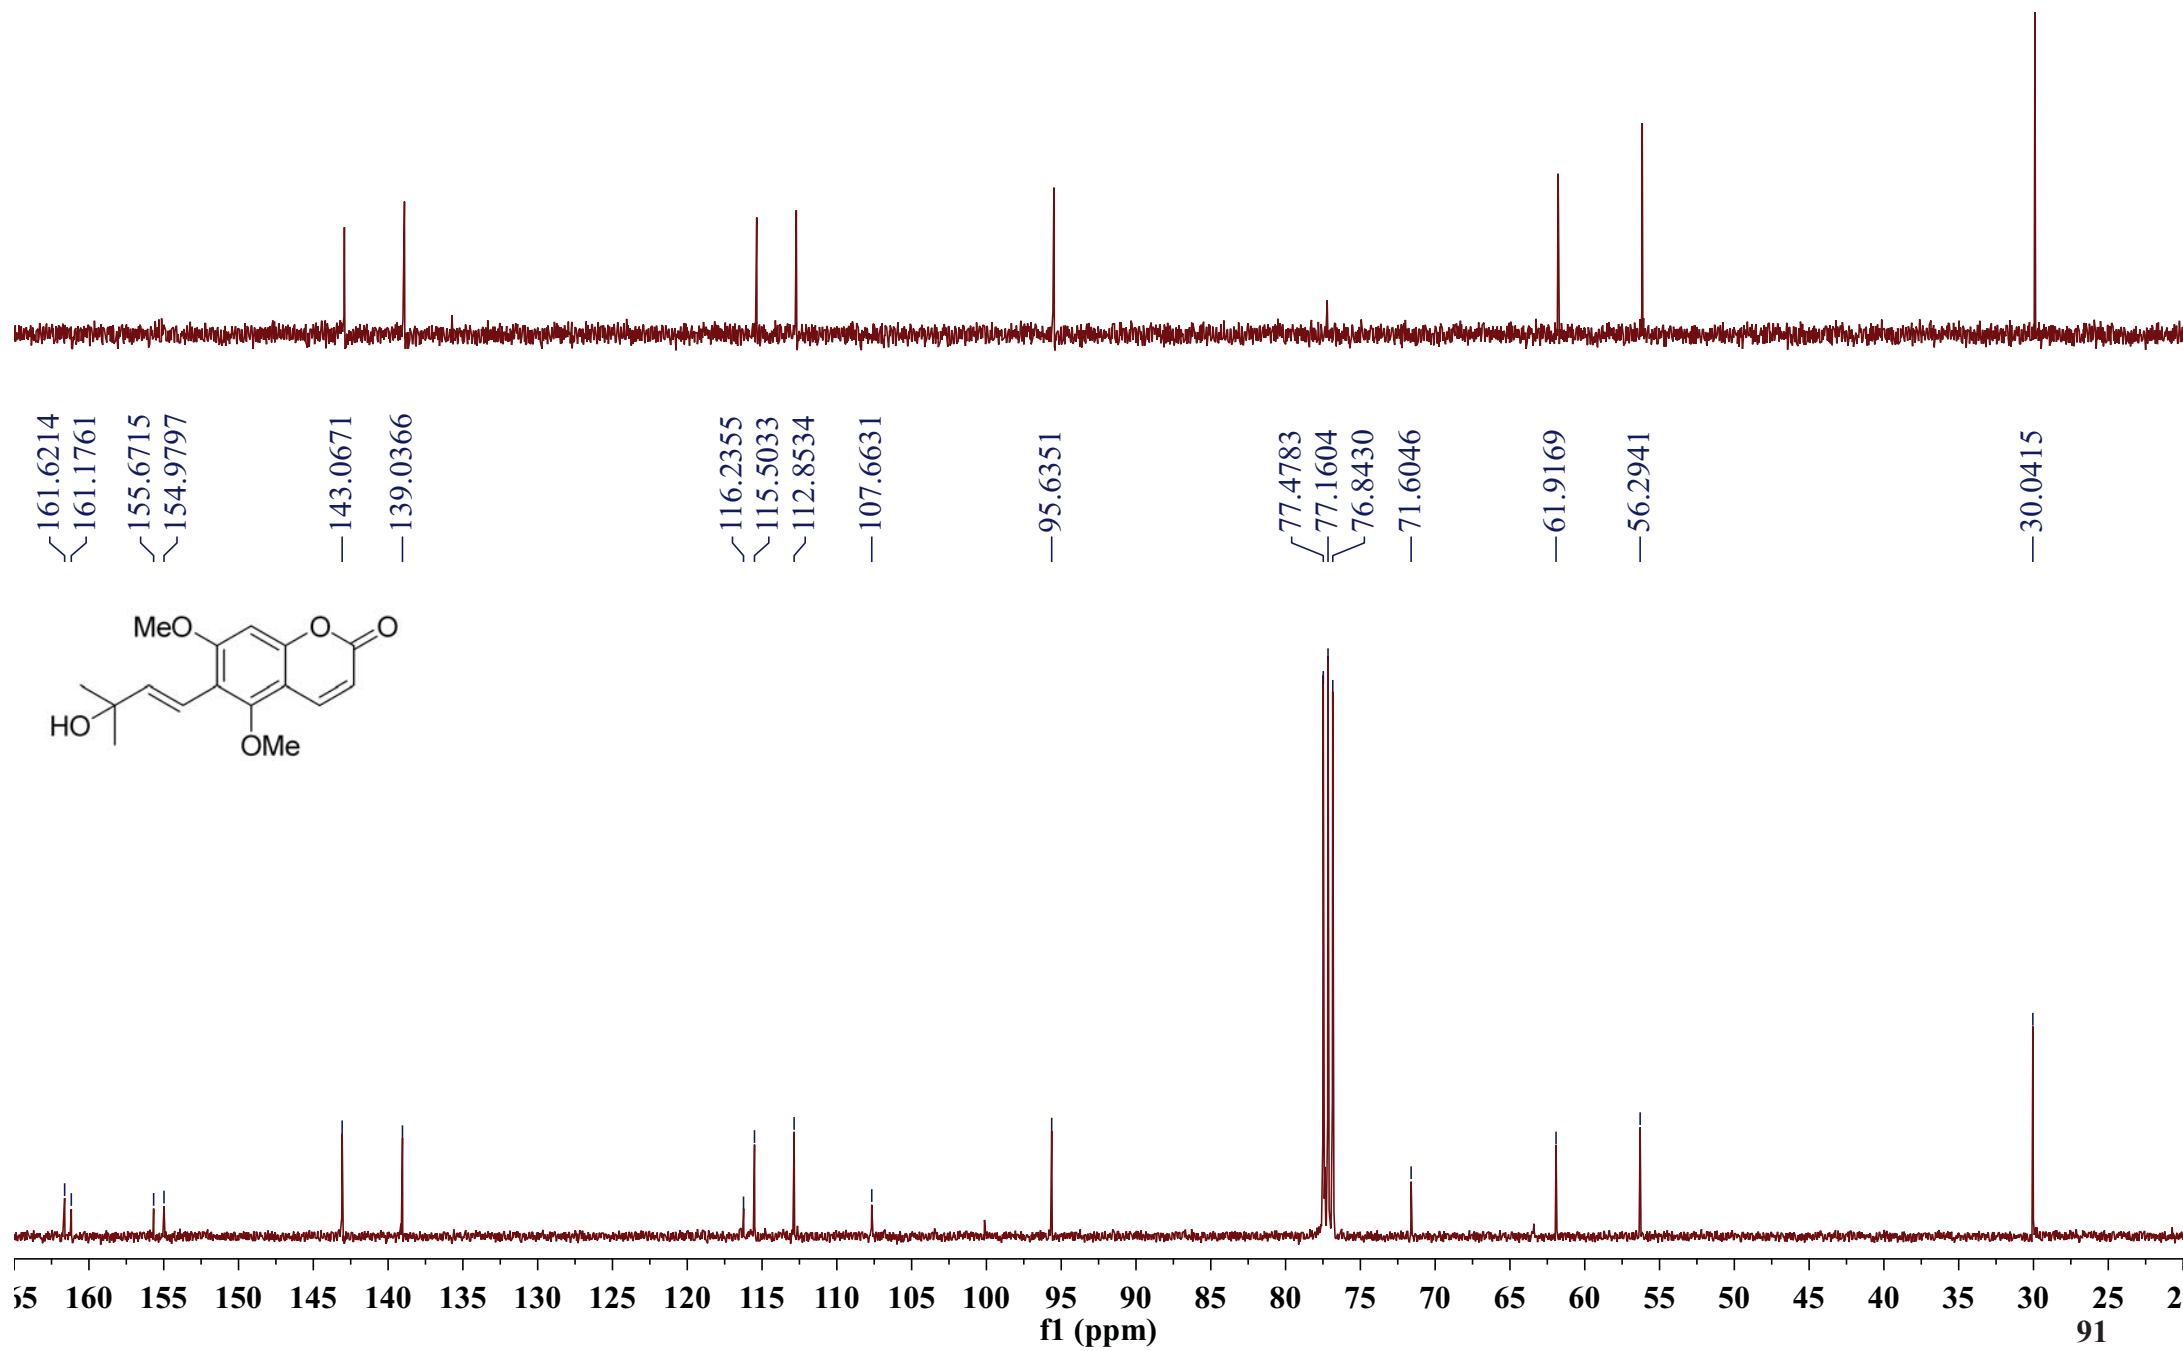

S6.17. <sup>1</sup>H NMR spectrum of compound 16

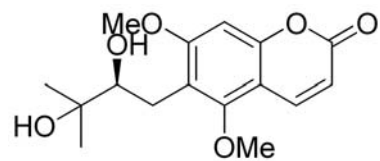

7.8458  
7.8221

7.2604

6.6268

6.2408  
6.2167

3.8790  
3.8614  
3.6067  
3.6008  
3.5951  
3.5893  
3.5809  
3.5749  
3.5694  
3.5635  
2.9151  
2.9092  
2.8809  
2.8749  
2.7665  
2.7409  
2.7323  
2.7065  
2.6323  
2.6207  
2.3812  
1.8510  
1.2880  
1.2724

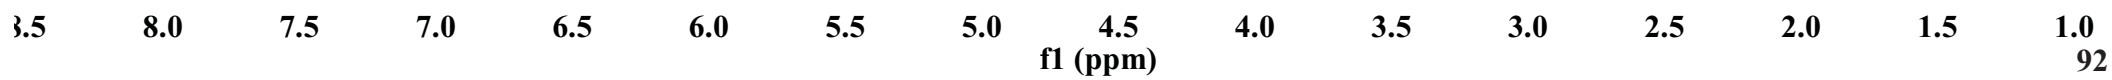

S6.18. <sup>13</sup>C NMR and DEPT spectra of compound 16

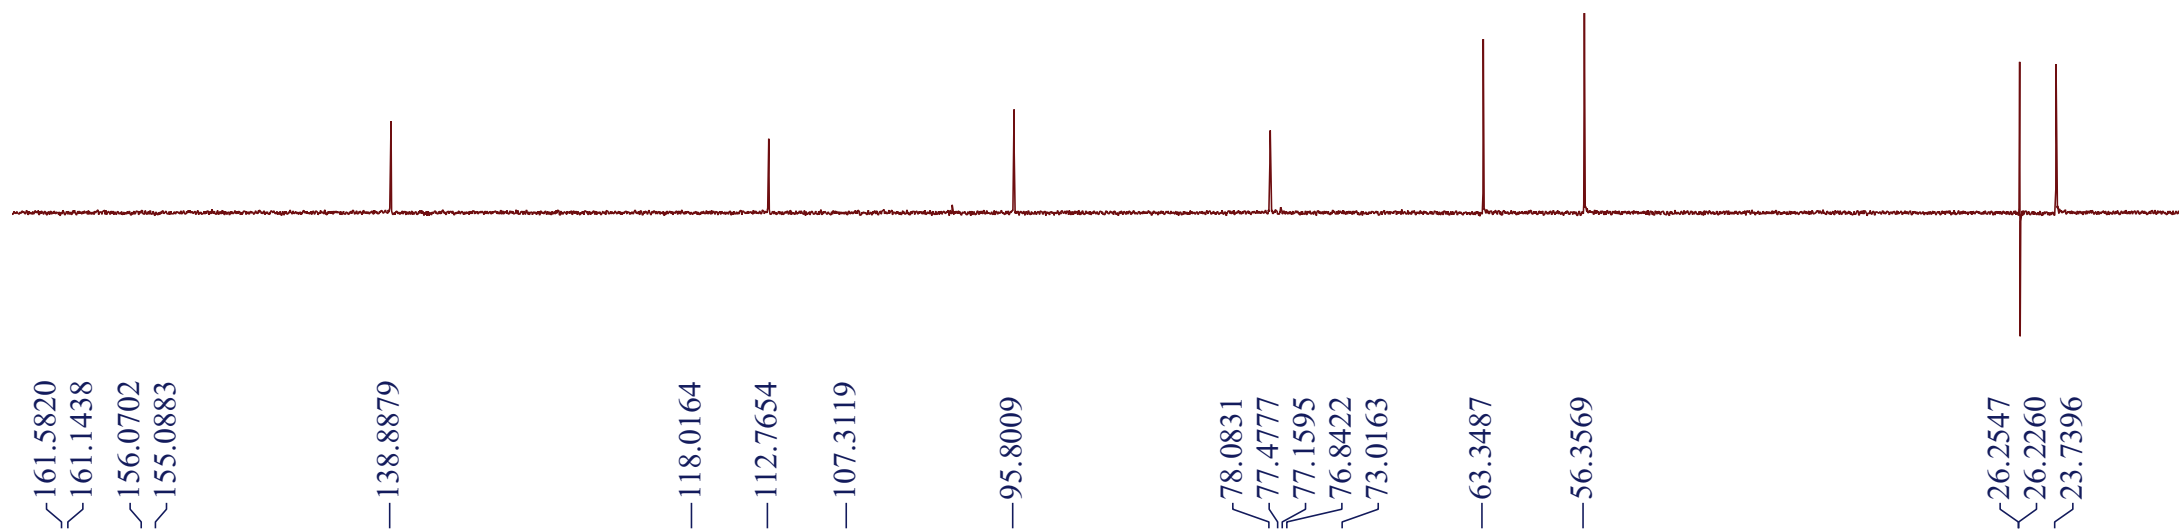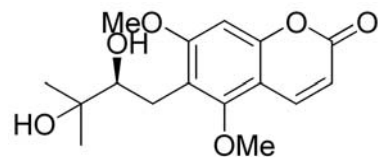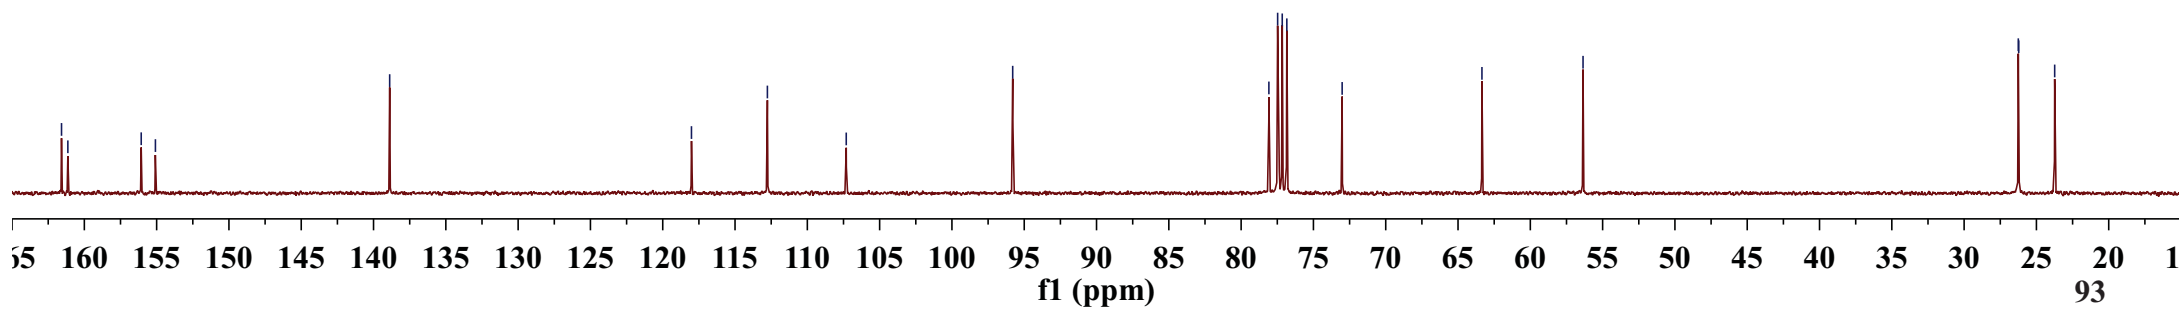

S6.19. <sup>1</sup>H NMR spectrum of compound 17

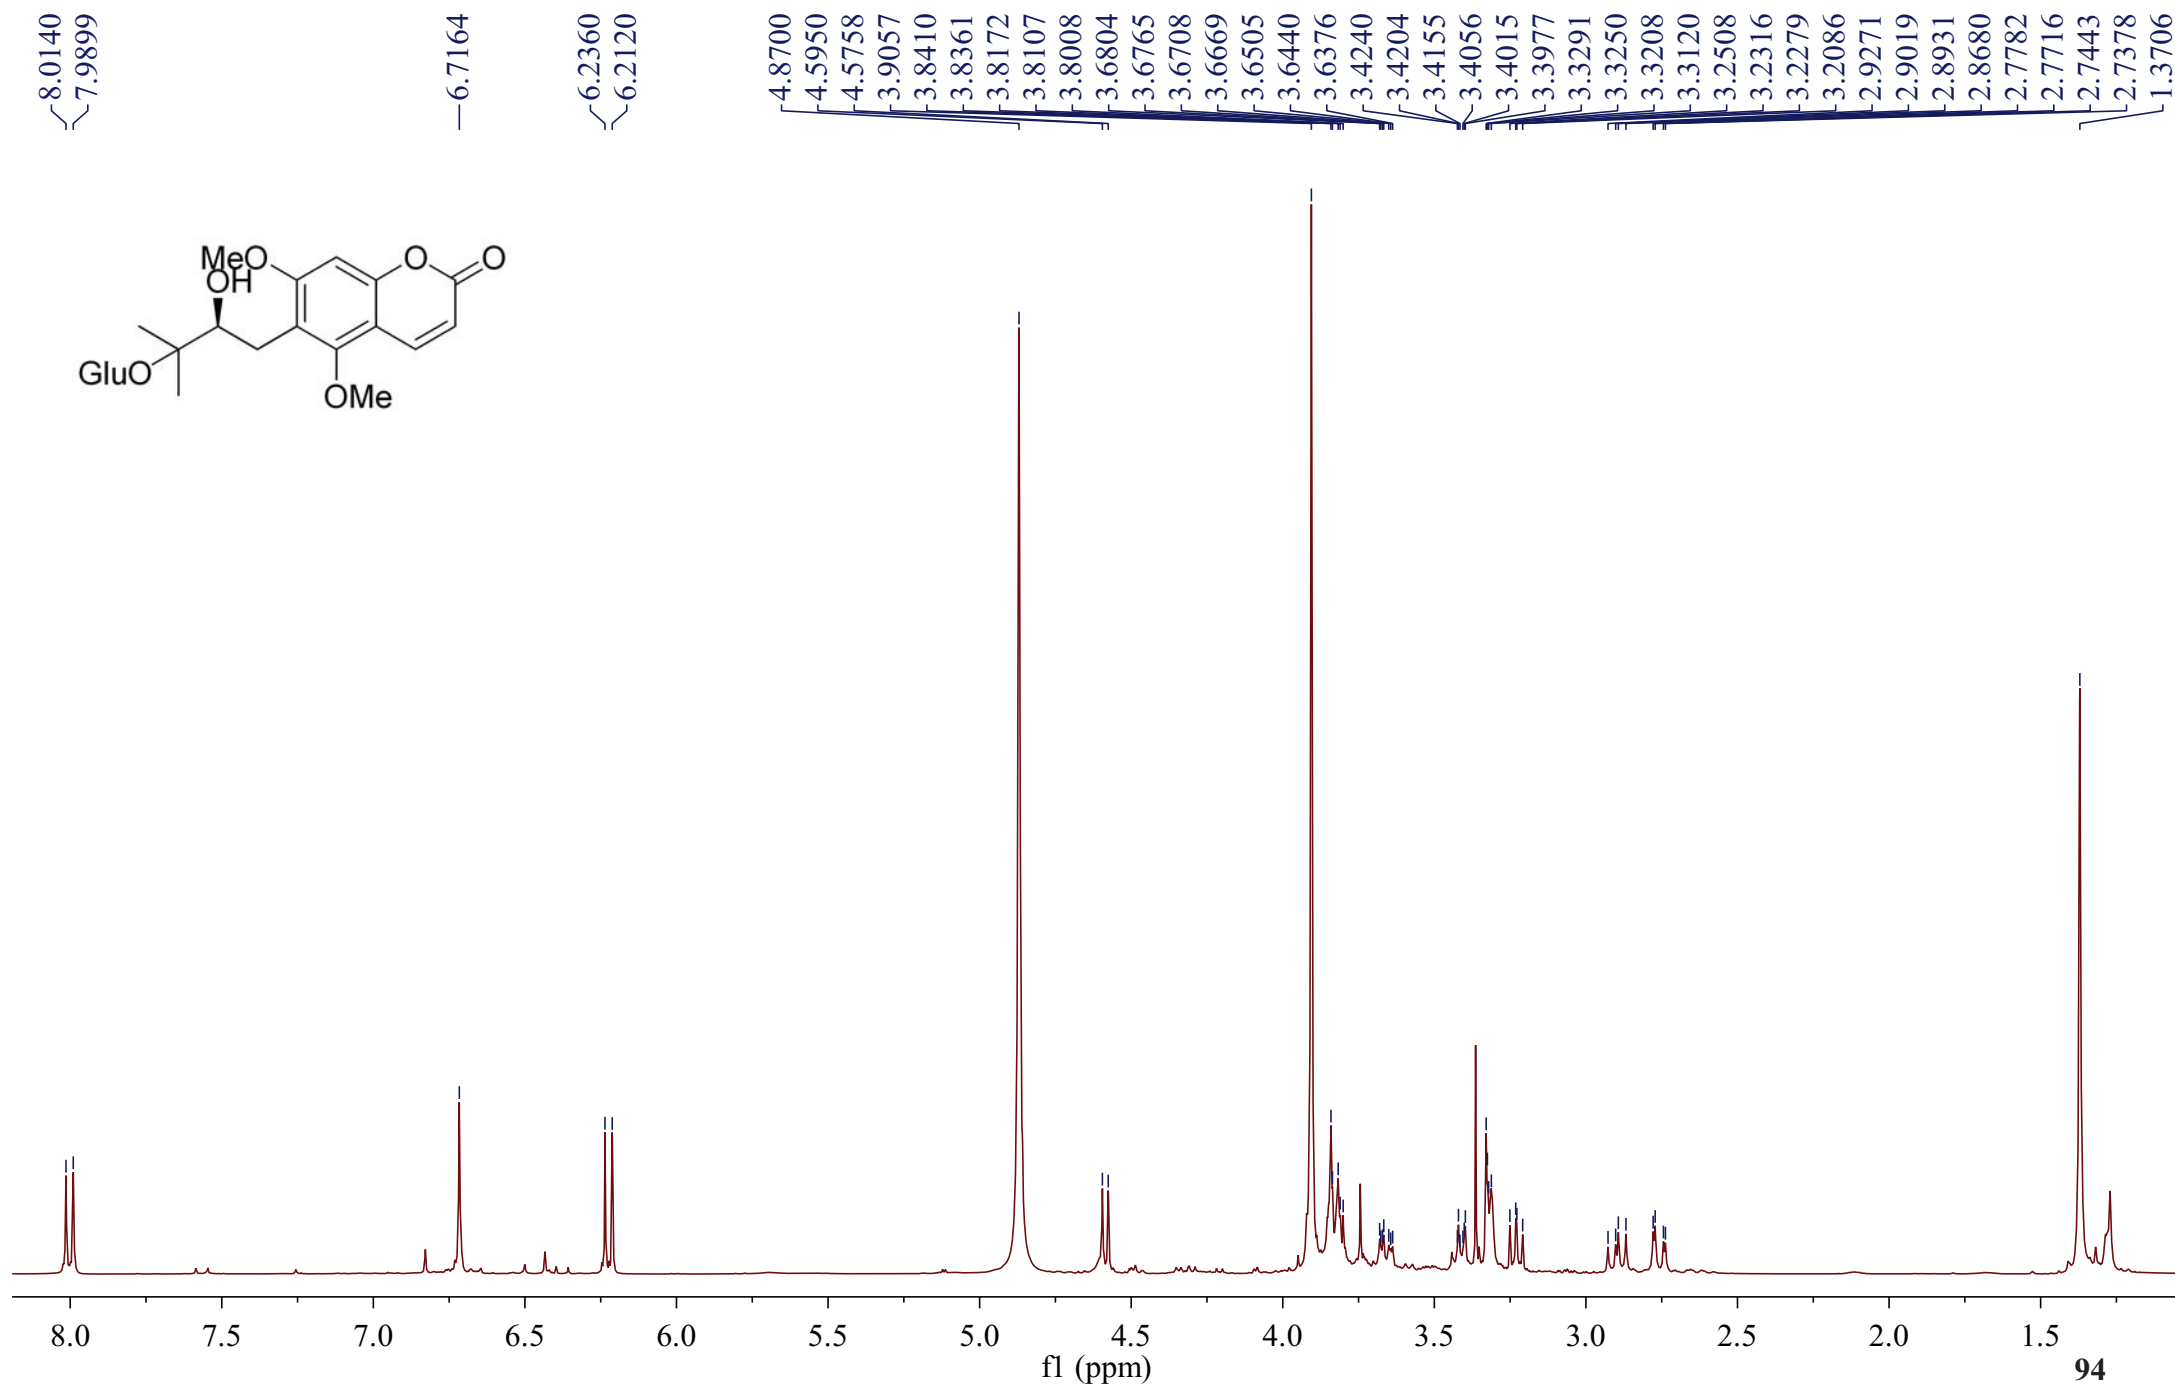

S6.20.  $^{13}\text{C}$  NMR and DEPT spectra of compound 17

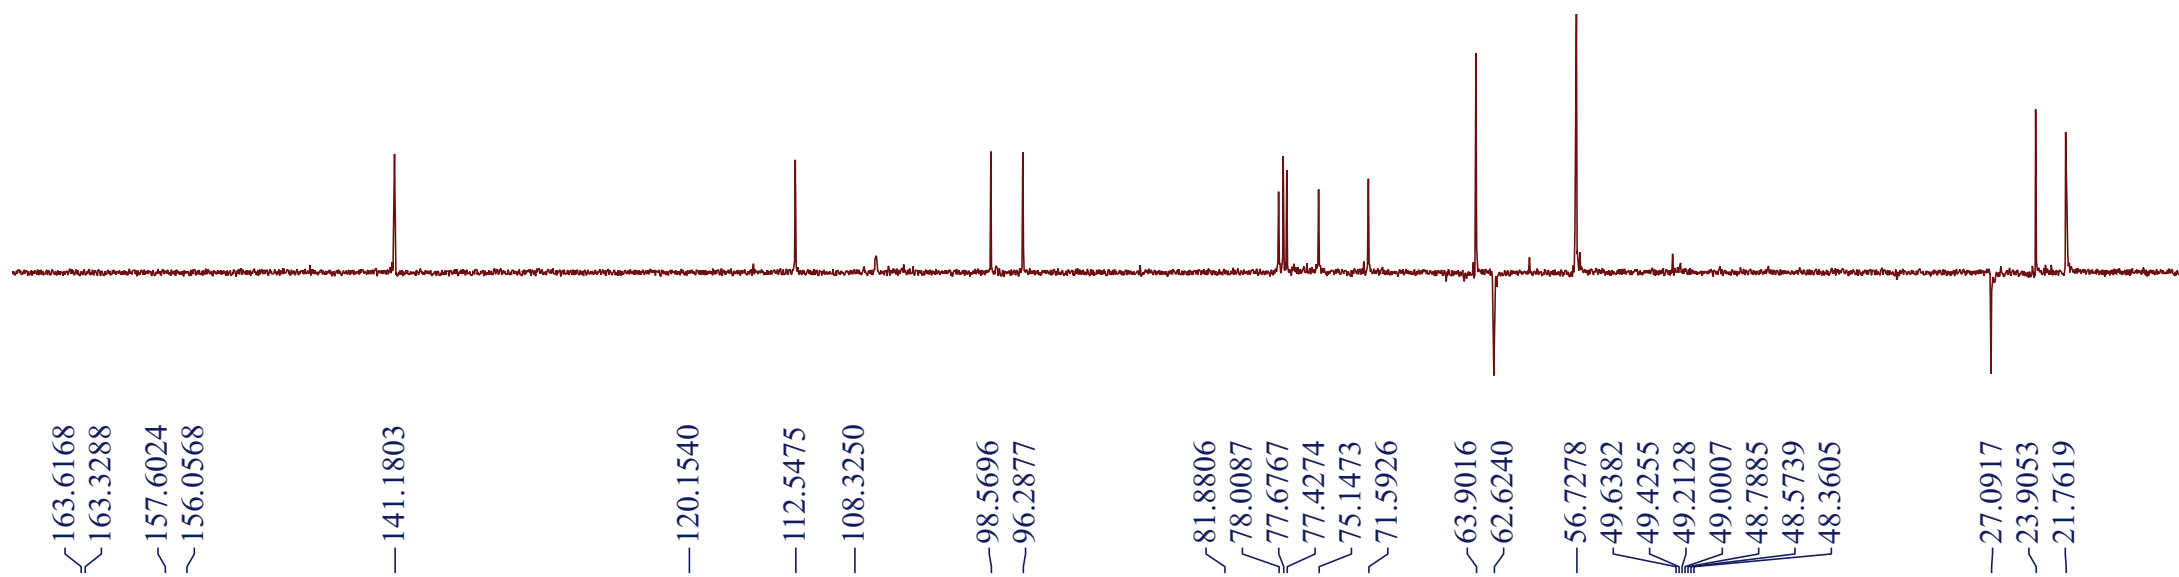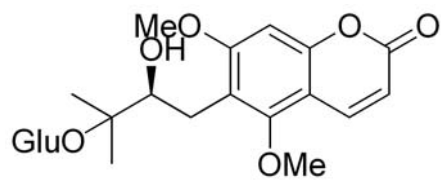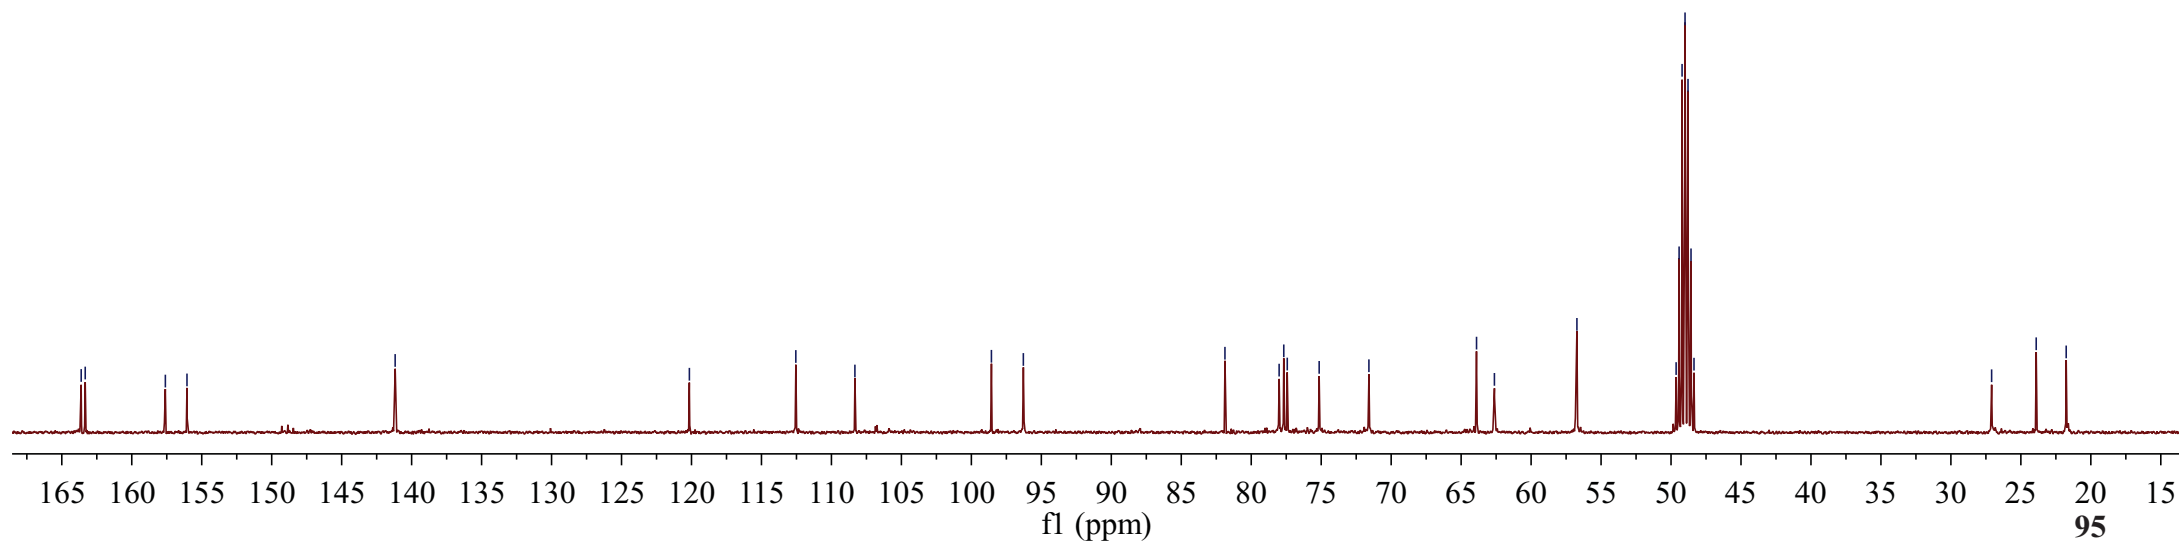

S6.21. <sup>1</sup>H NMR spectrum of compound 18

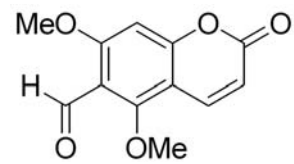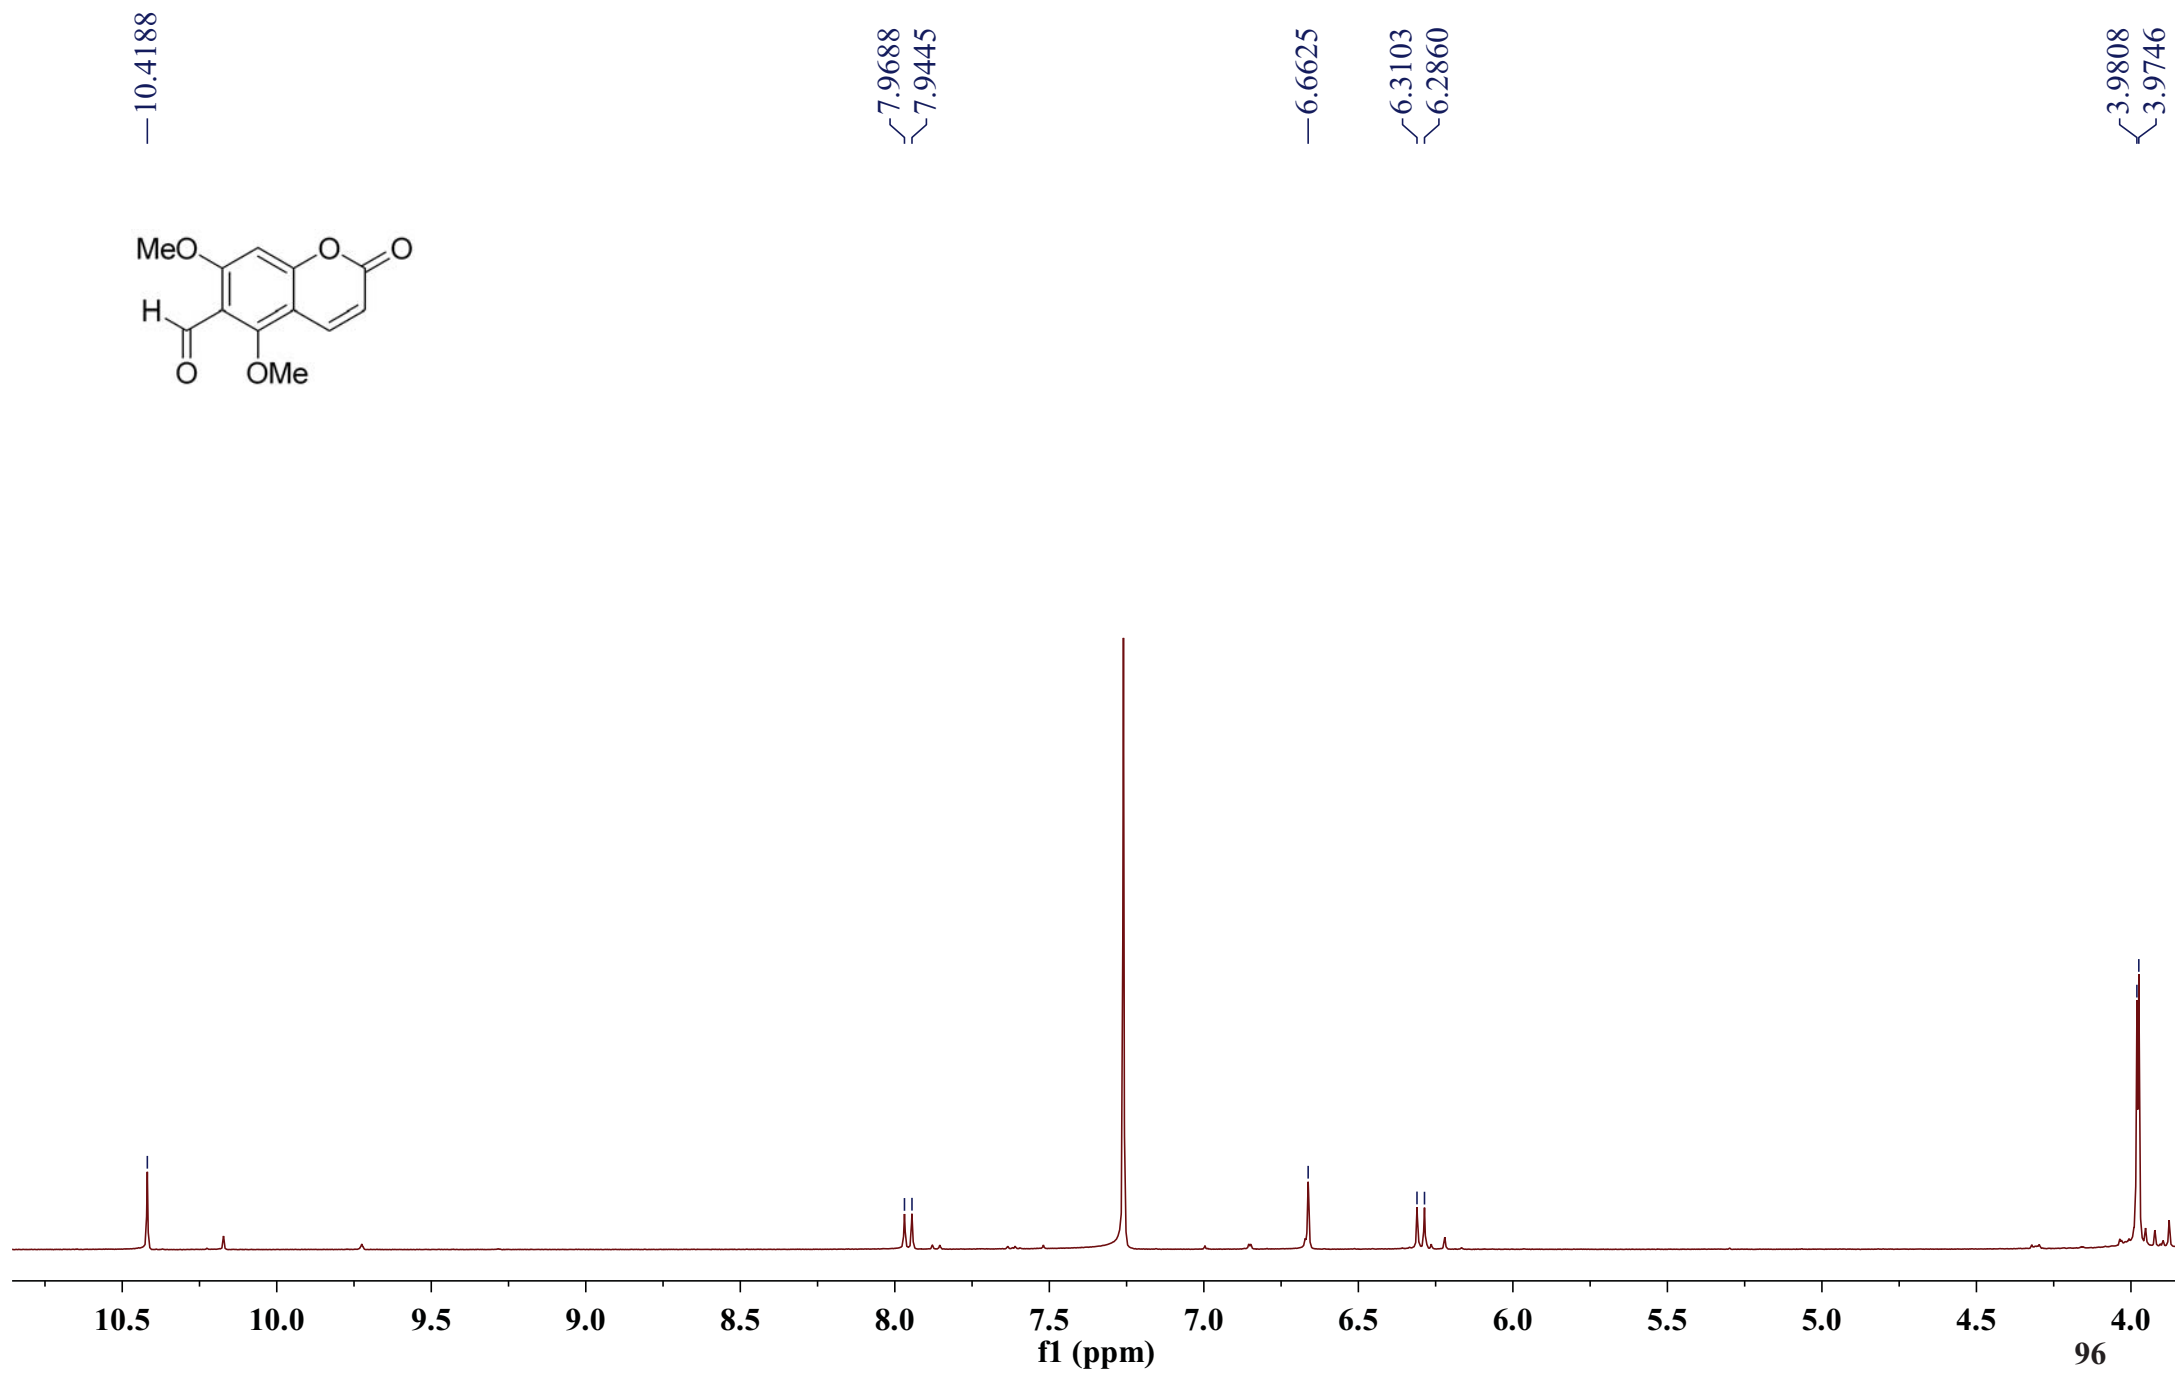



S6.22.  $^{13}\text{C}$  NMR and DEPT spectra of compound **18**

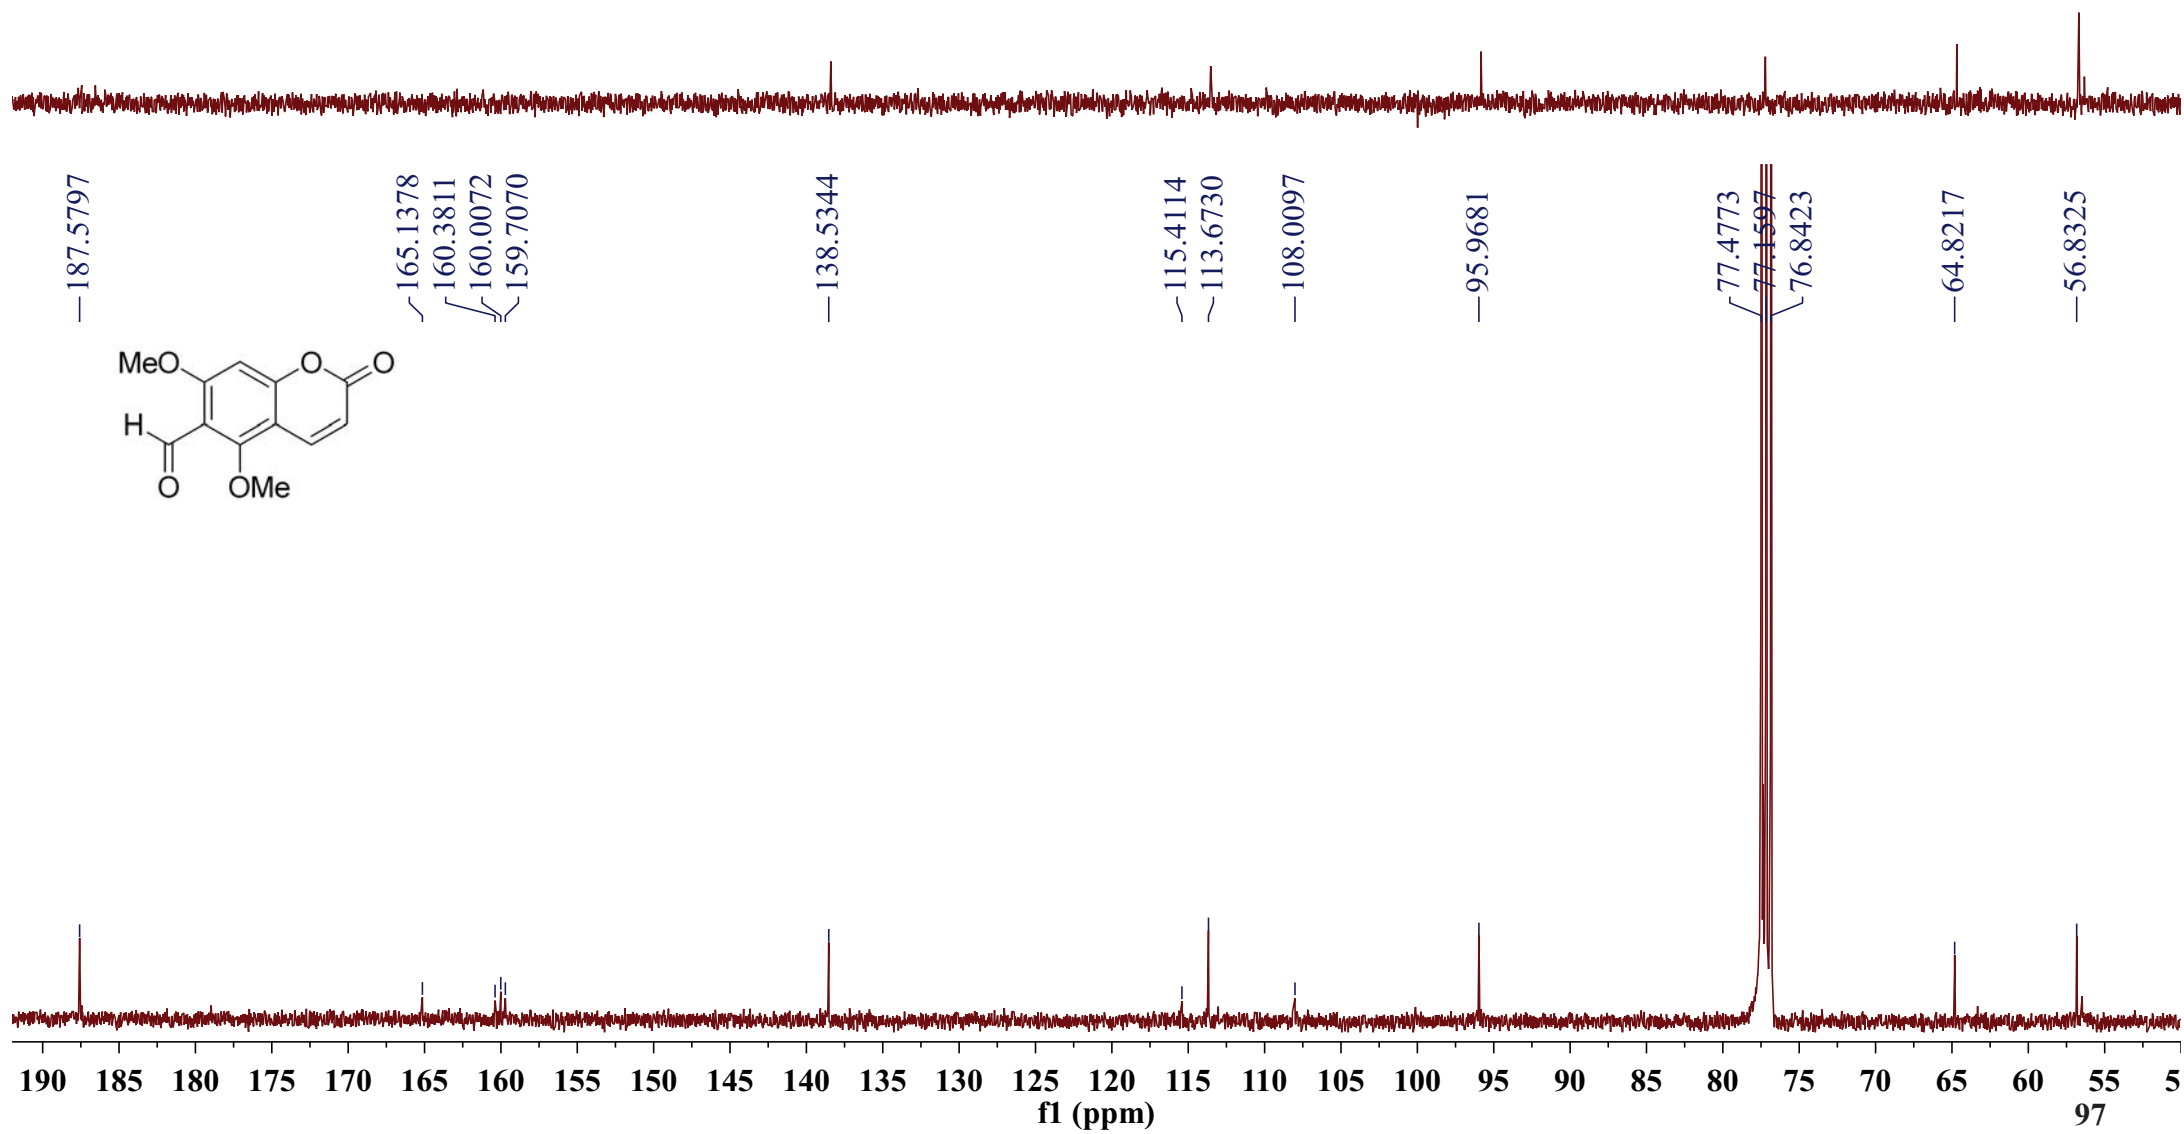

S6.23. <sup>1</sup>H NMR spectrum of compound 19

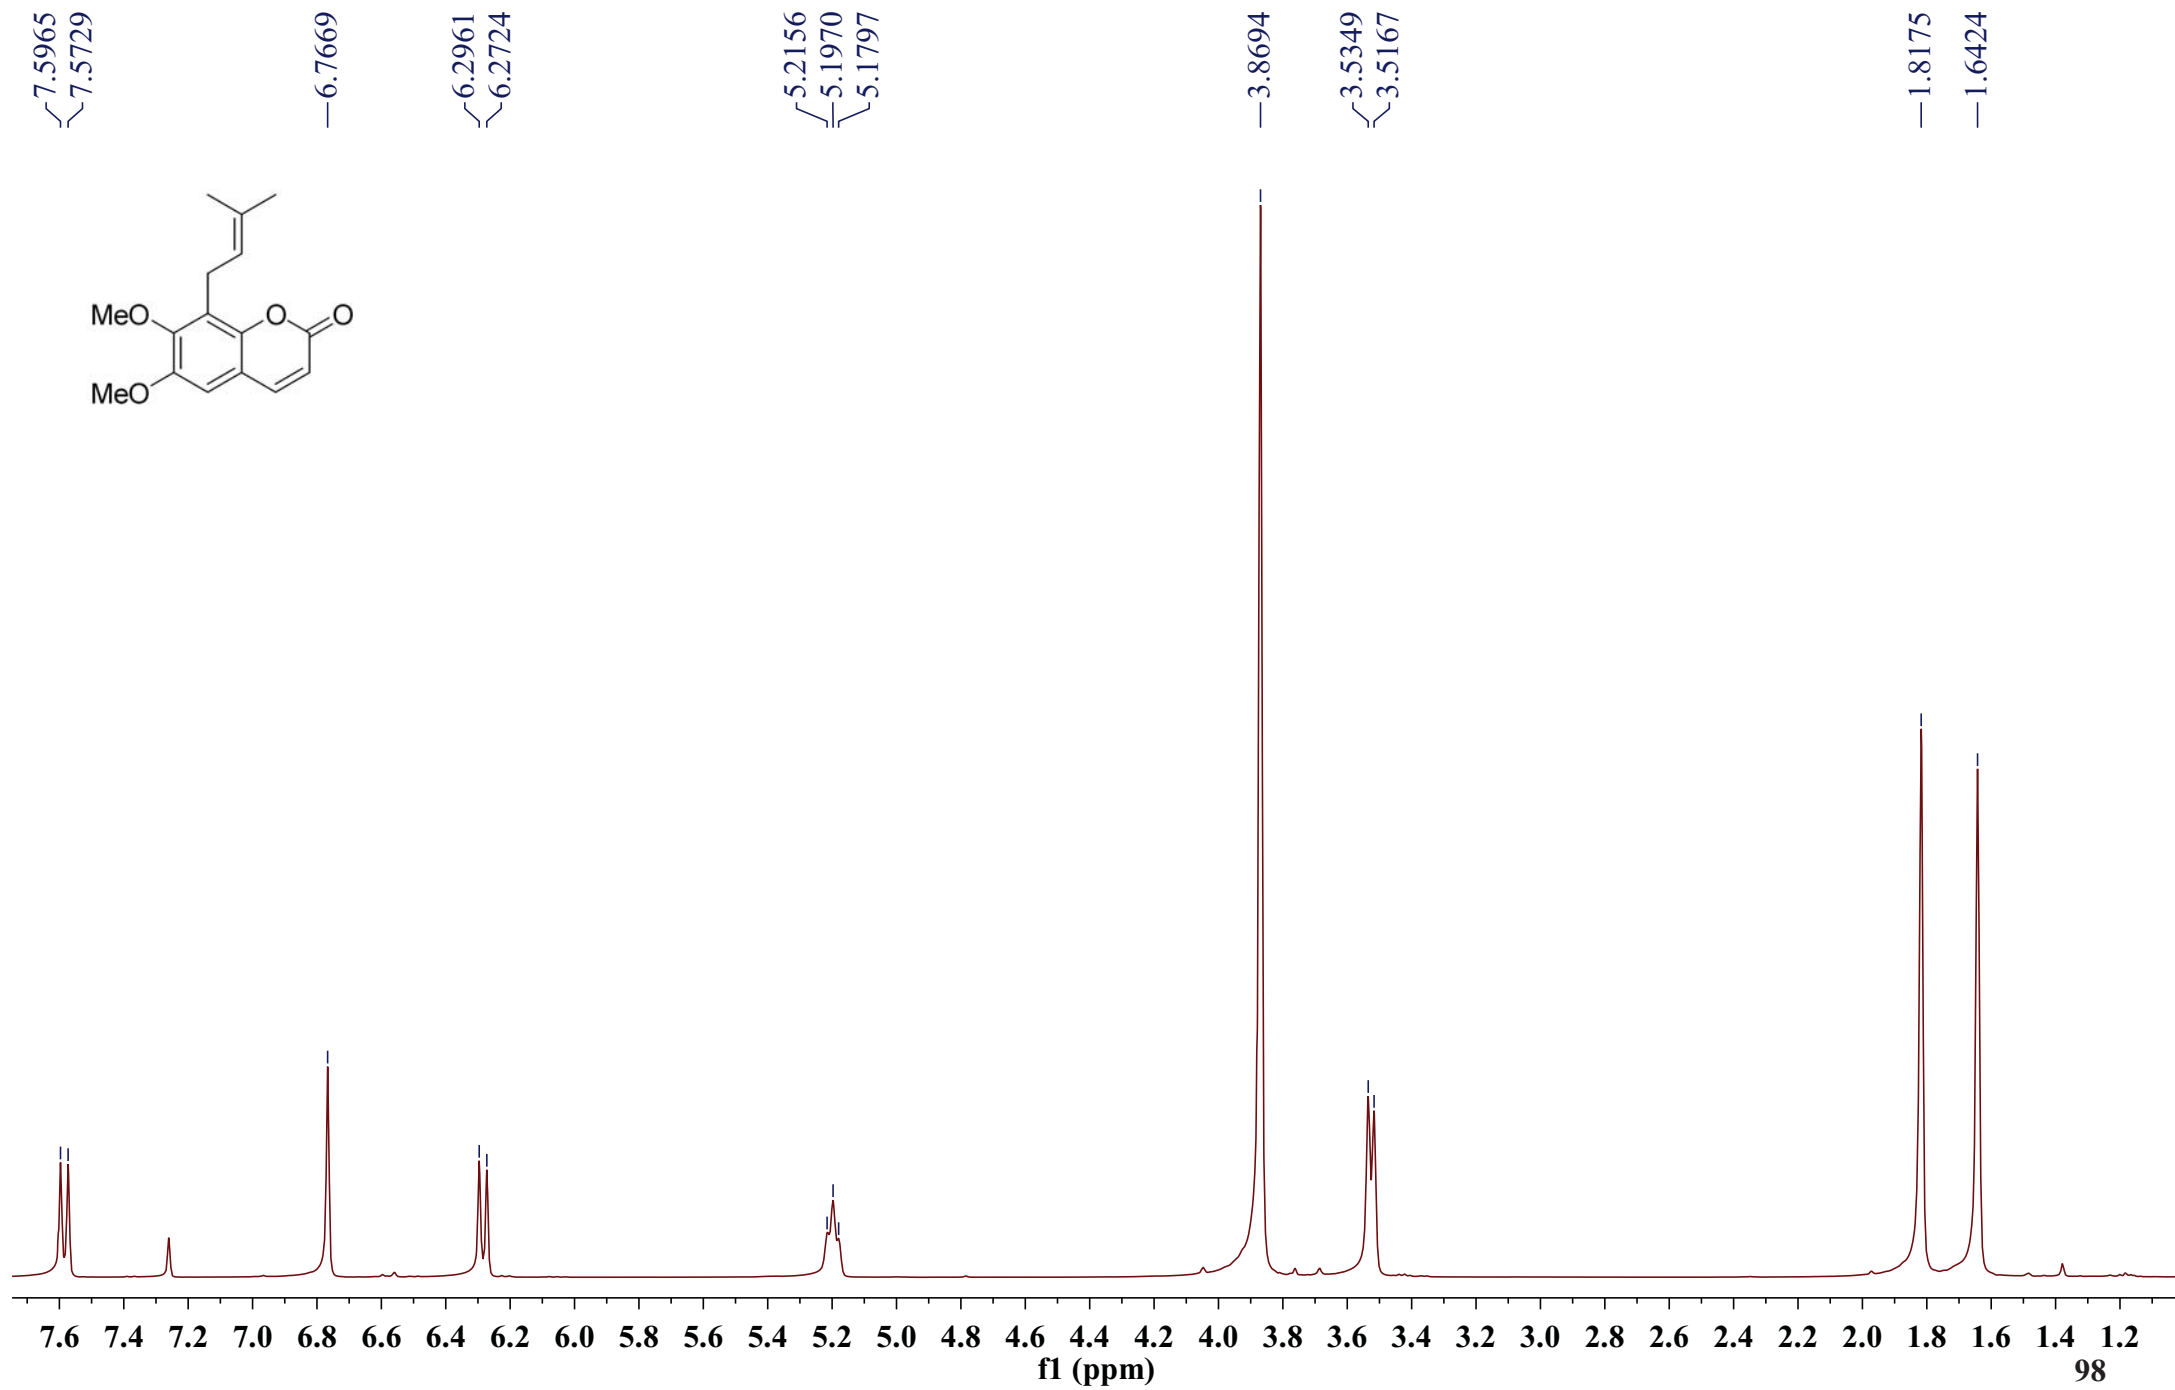

S6.24. <sup>13</sup>C NMR and DEPT spectra of compound 19

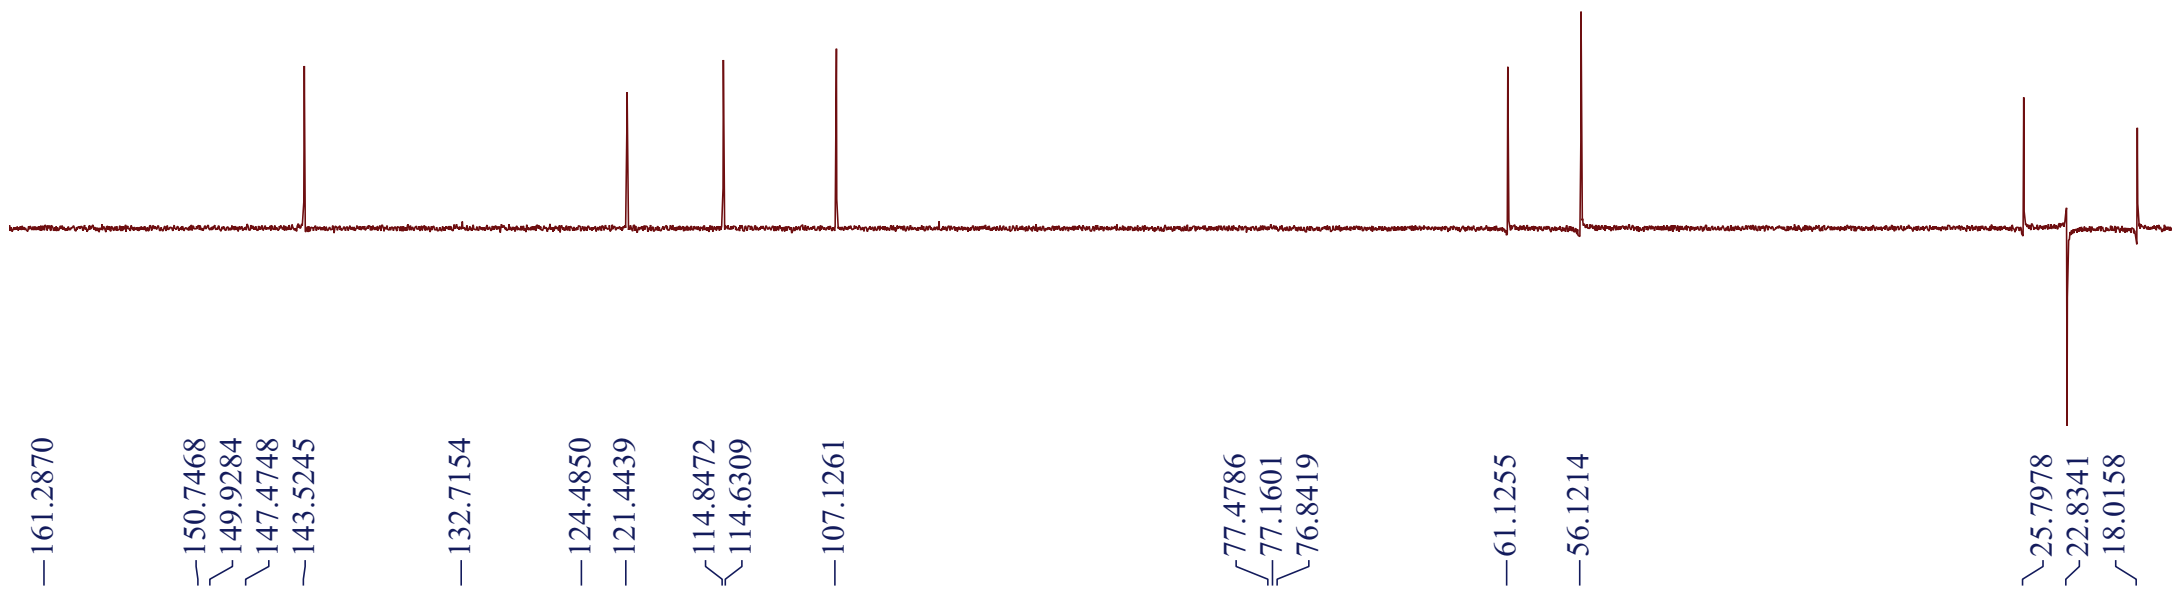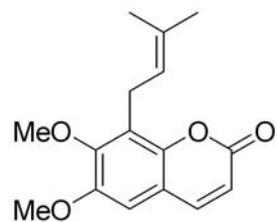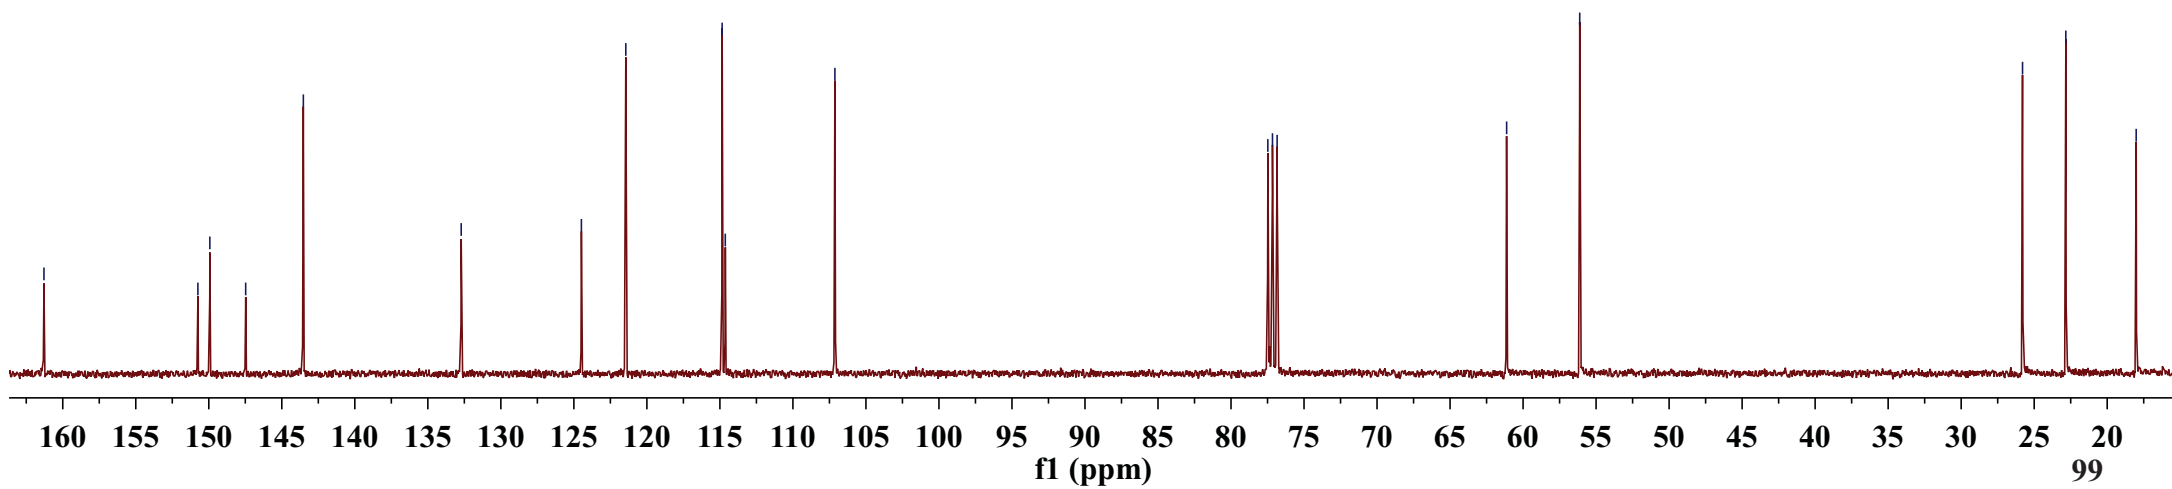

S6.25. <sup>1</sup>H NMR spectrum of compound 20

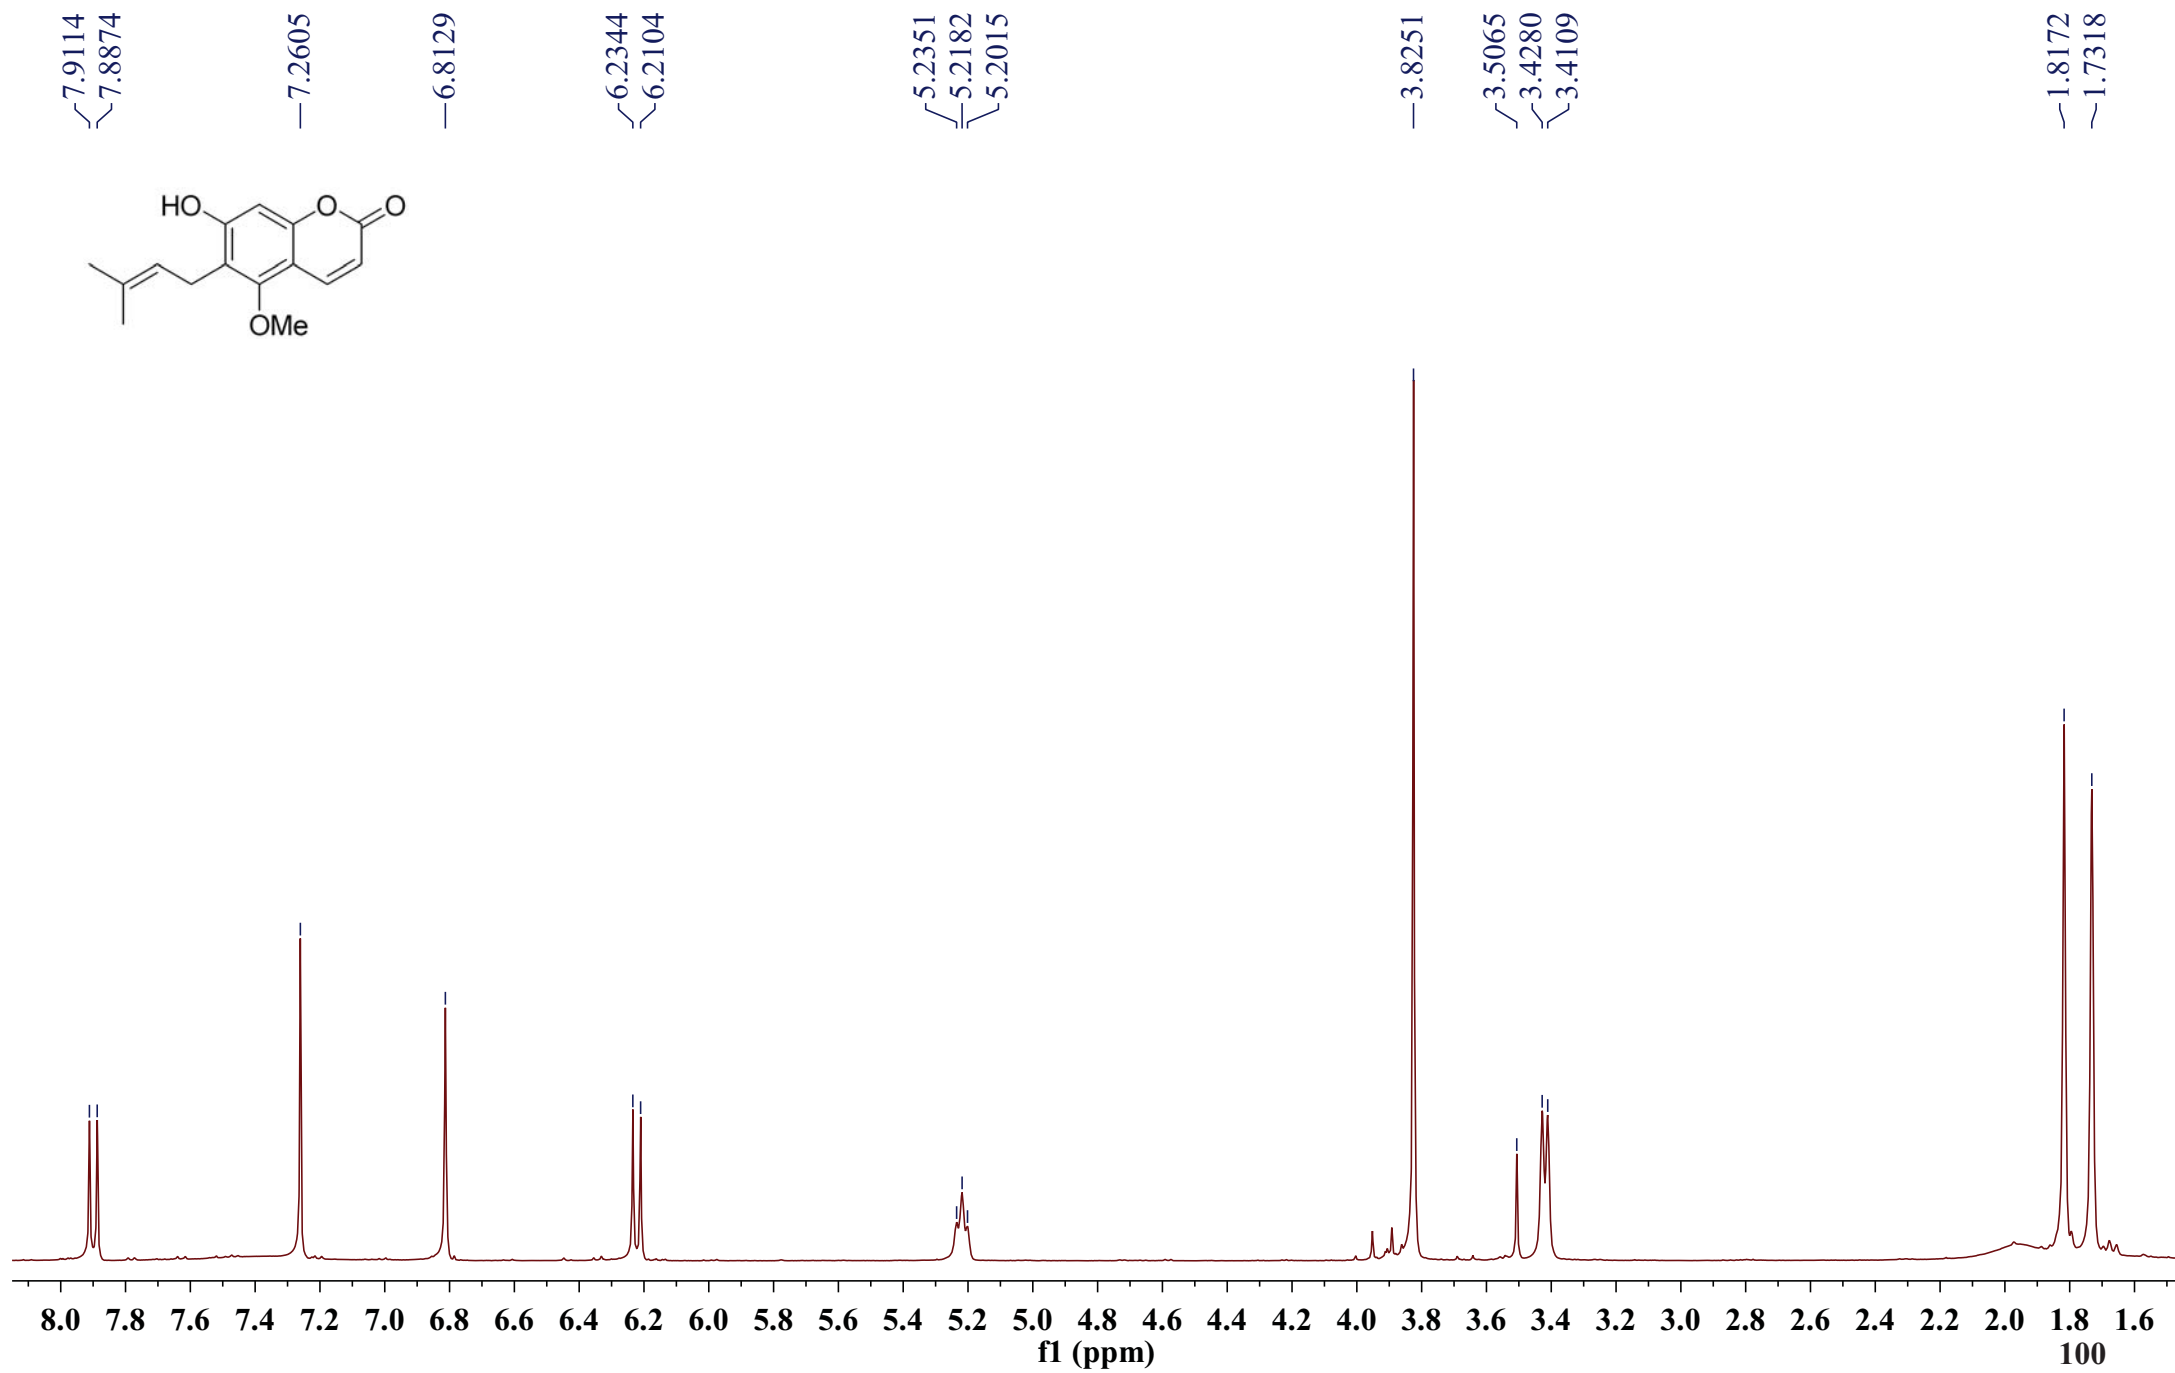

### S6.26. $^{13}\text{C}$ NMR and DEPT spectra of compound **20**

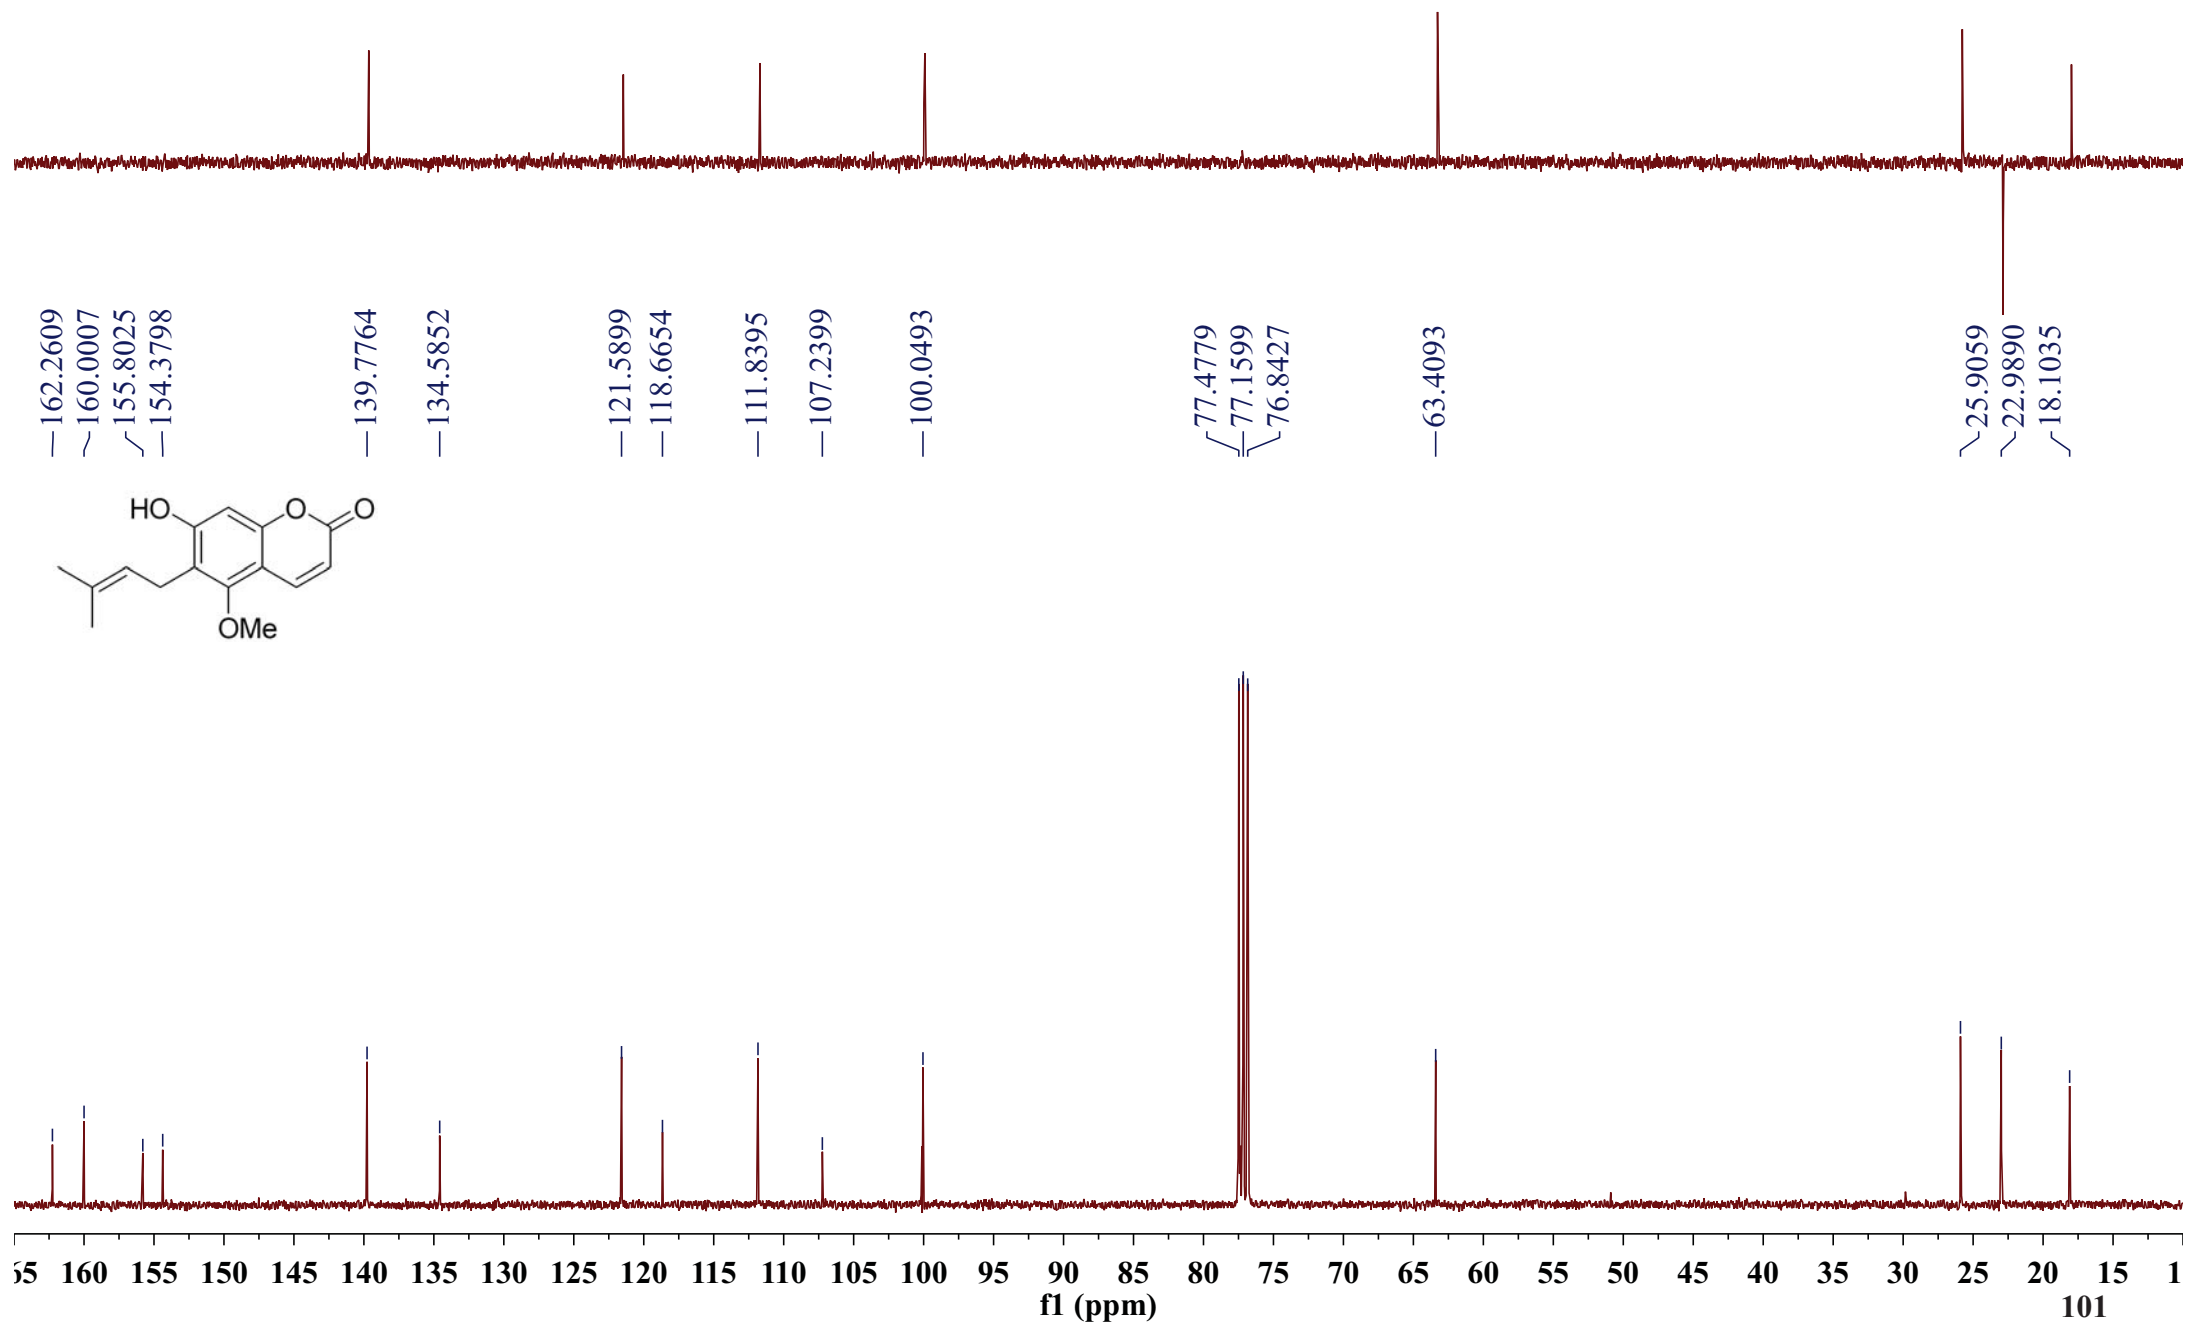

S6.27. HSQC spectrum of compound **20**

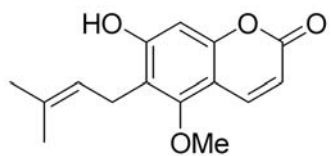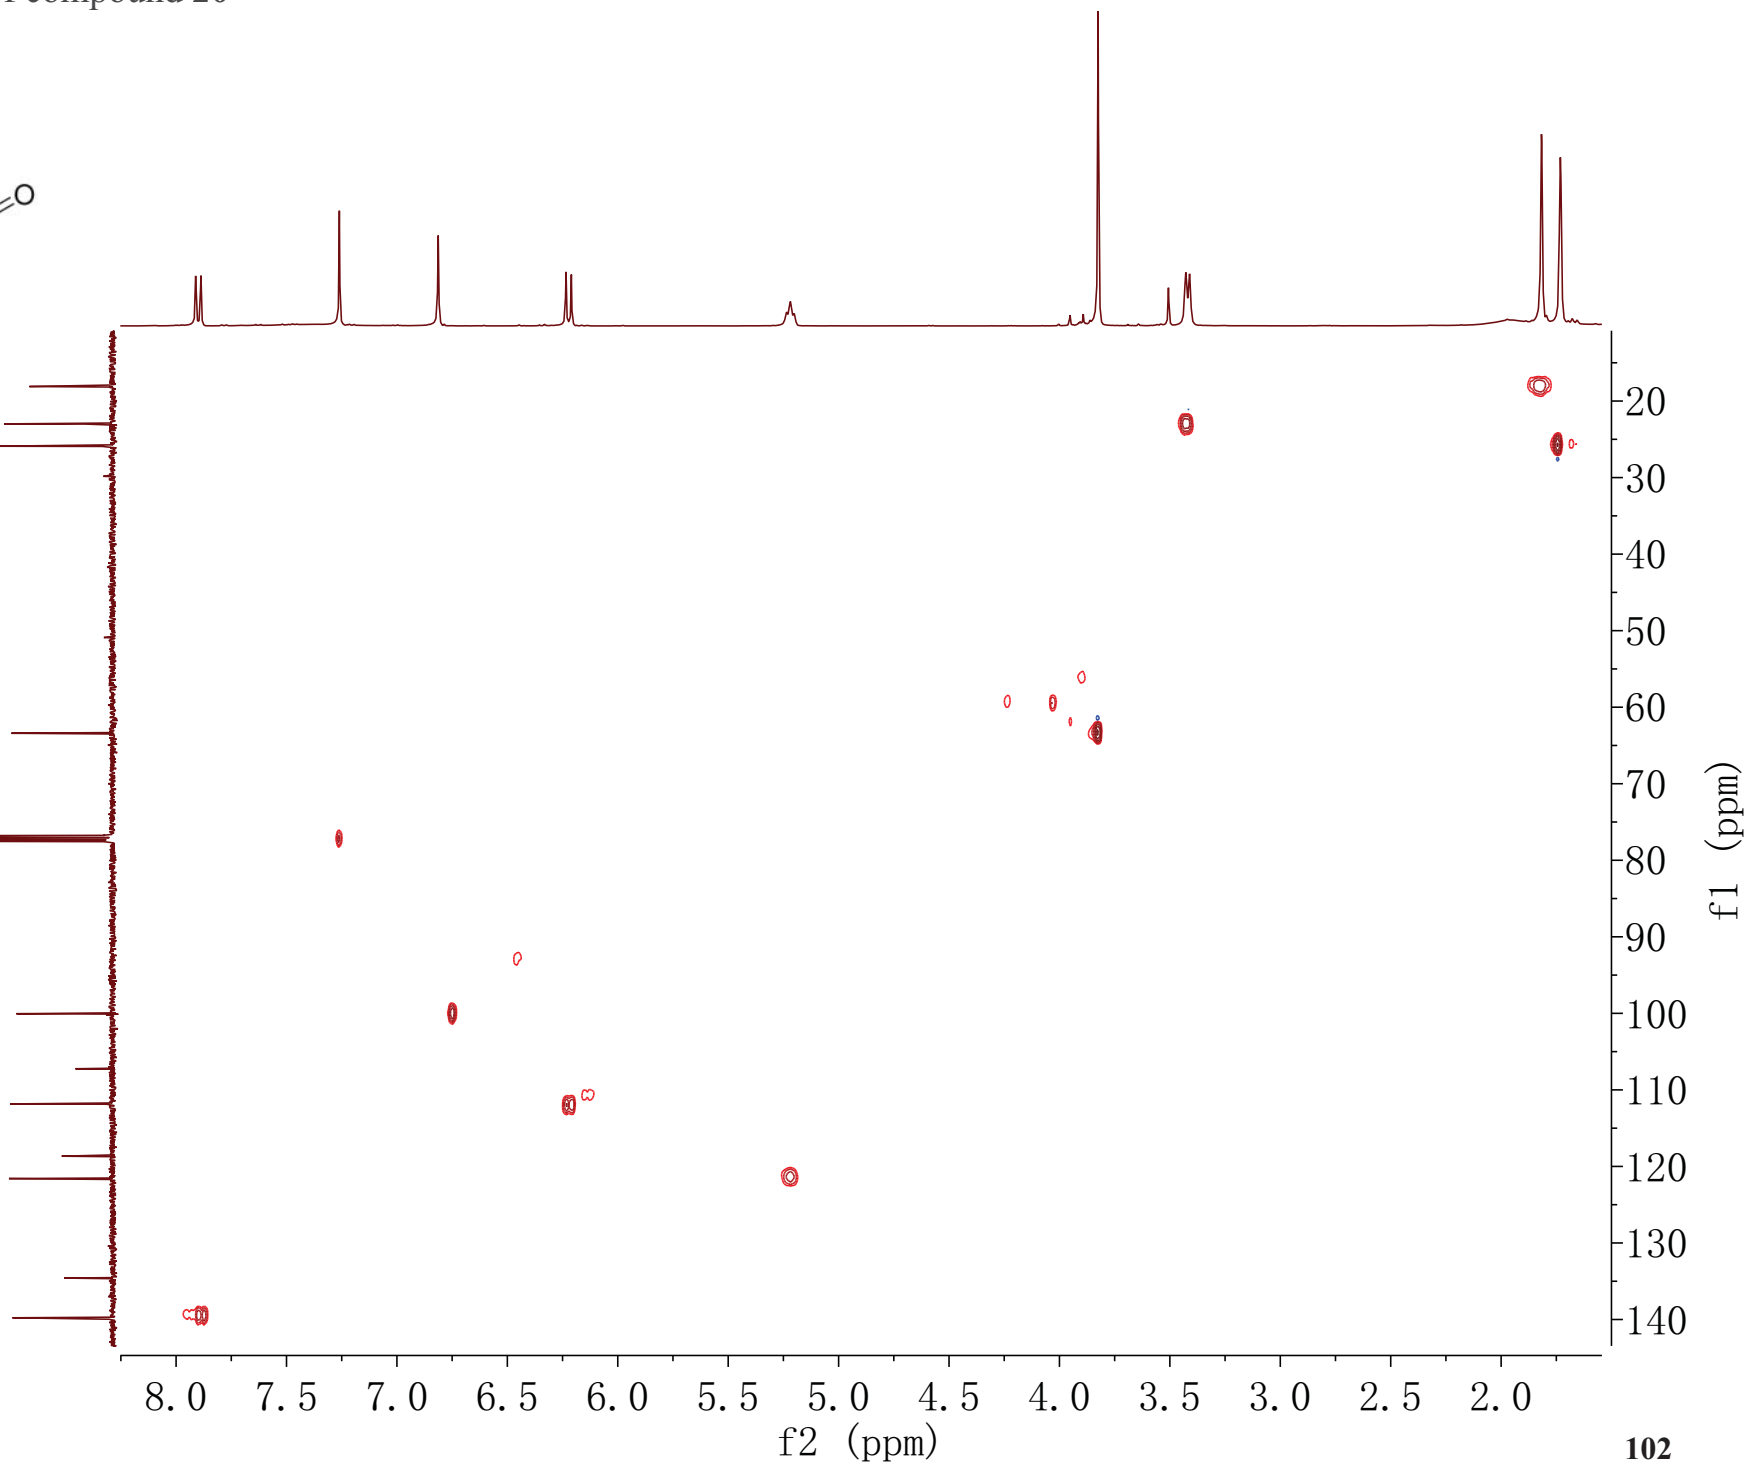

S6.28.  $^1\text{H}$ - $^1\text{H}$  COSY spectrum of compound 20

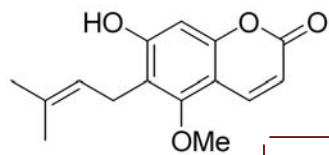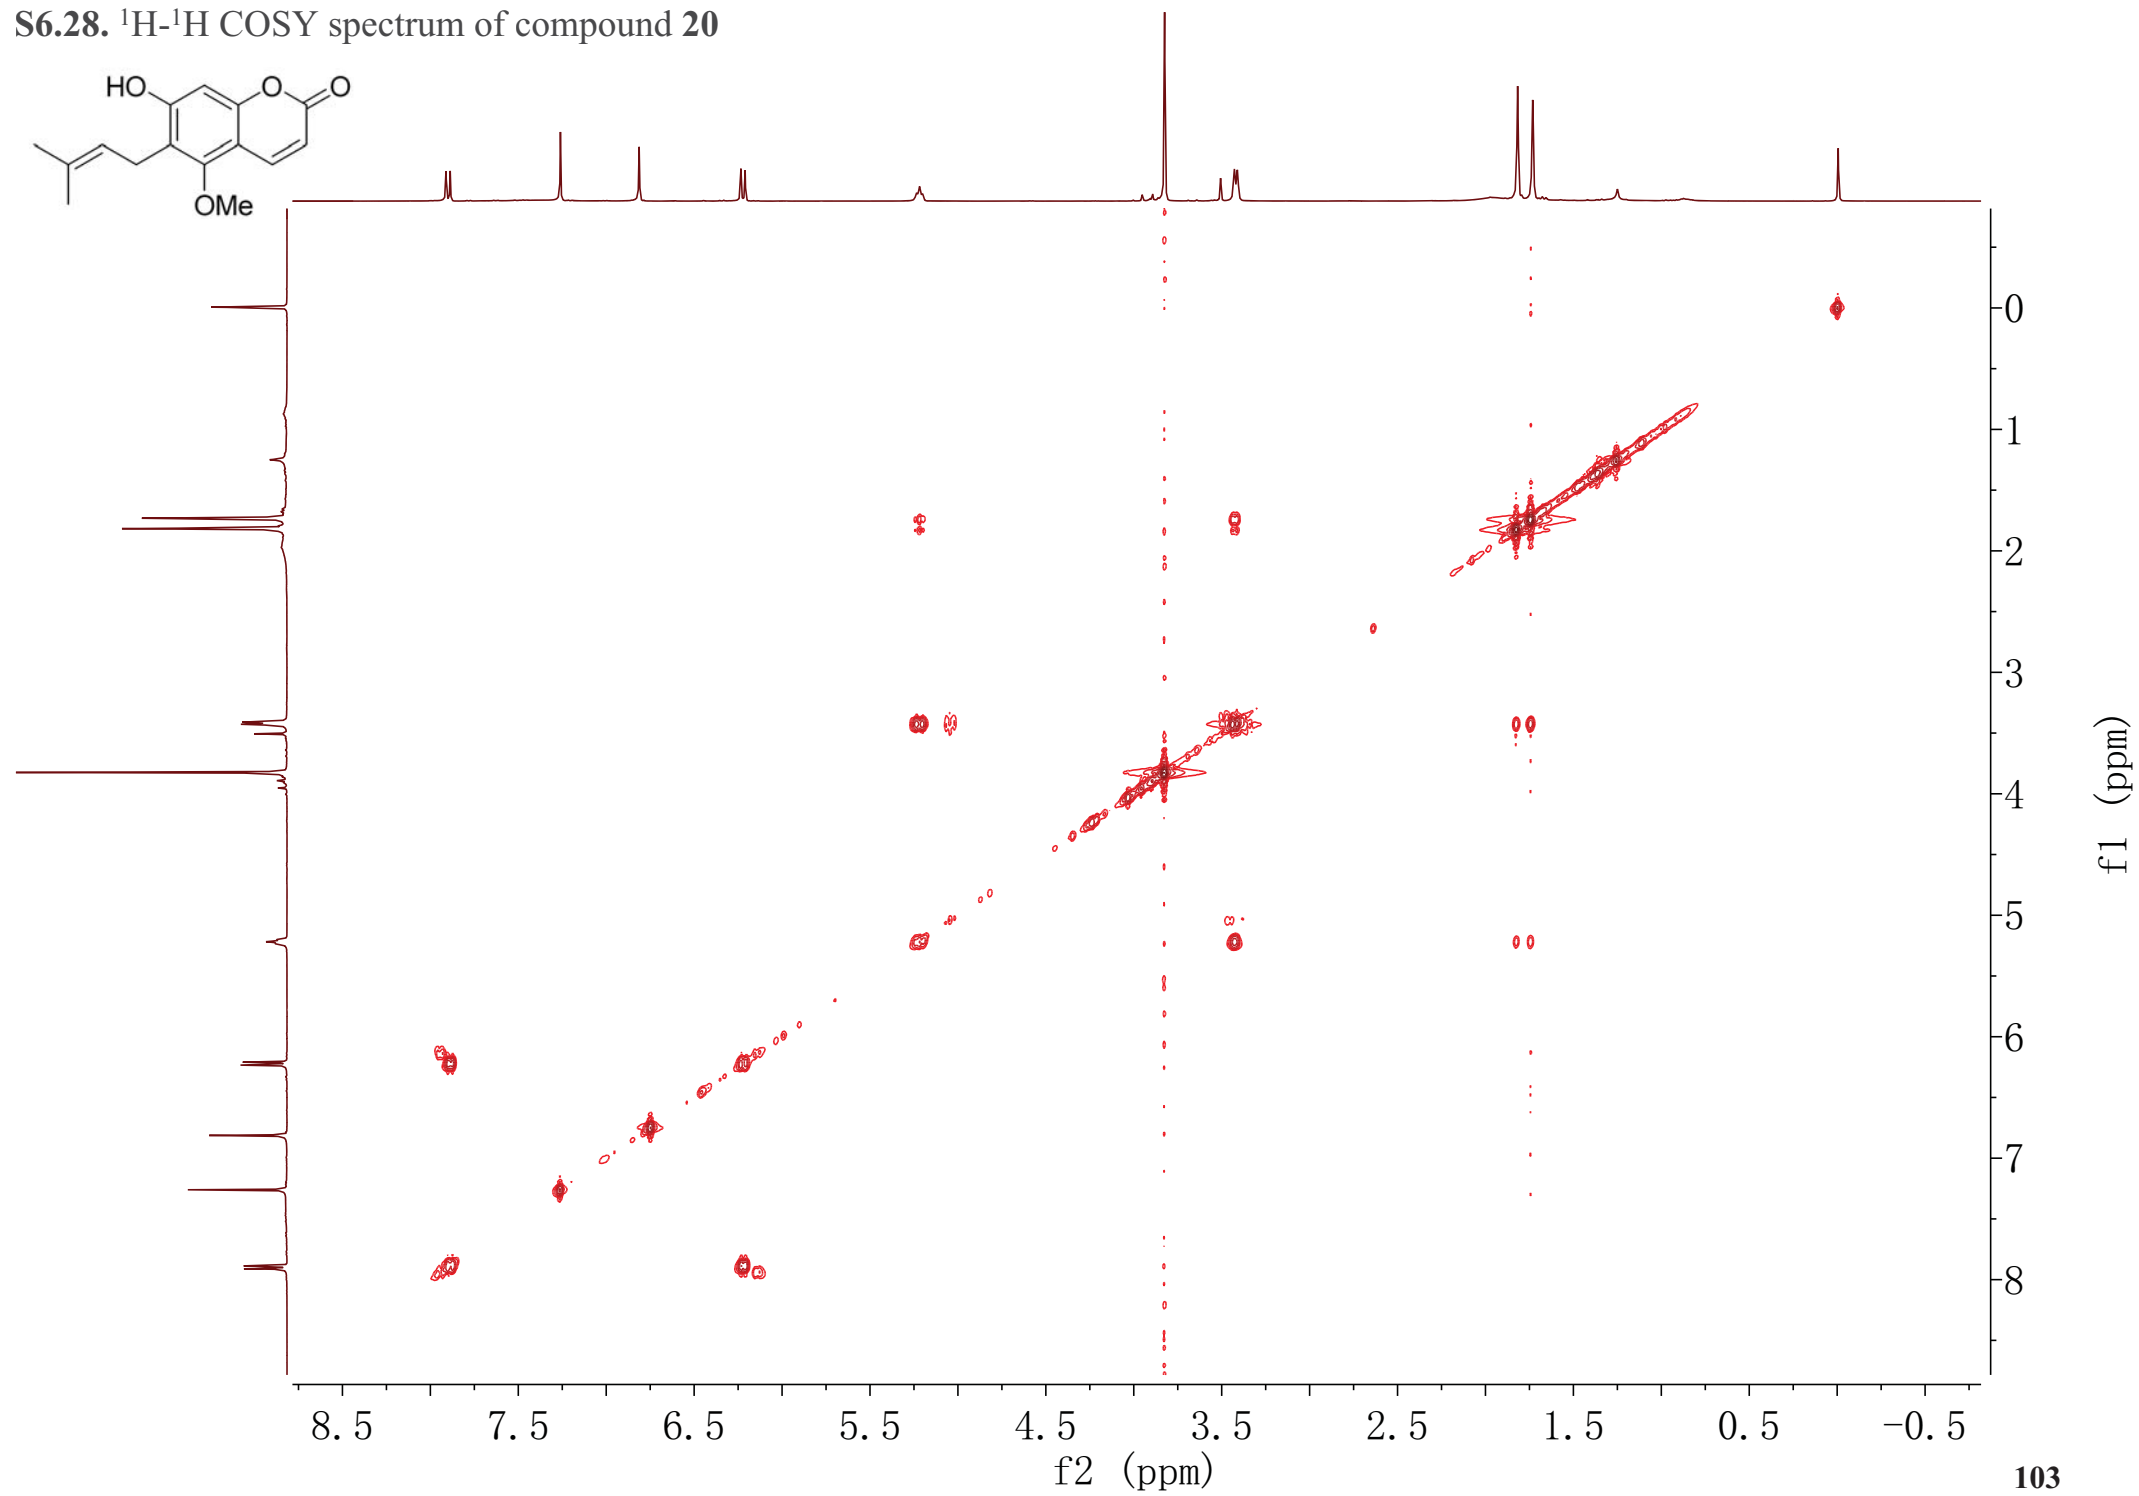

S6.29. HMBC spectrum of compound **20**

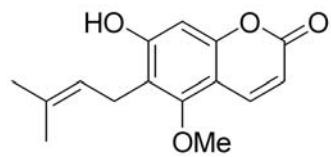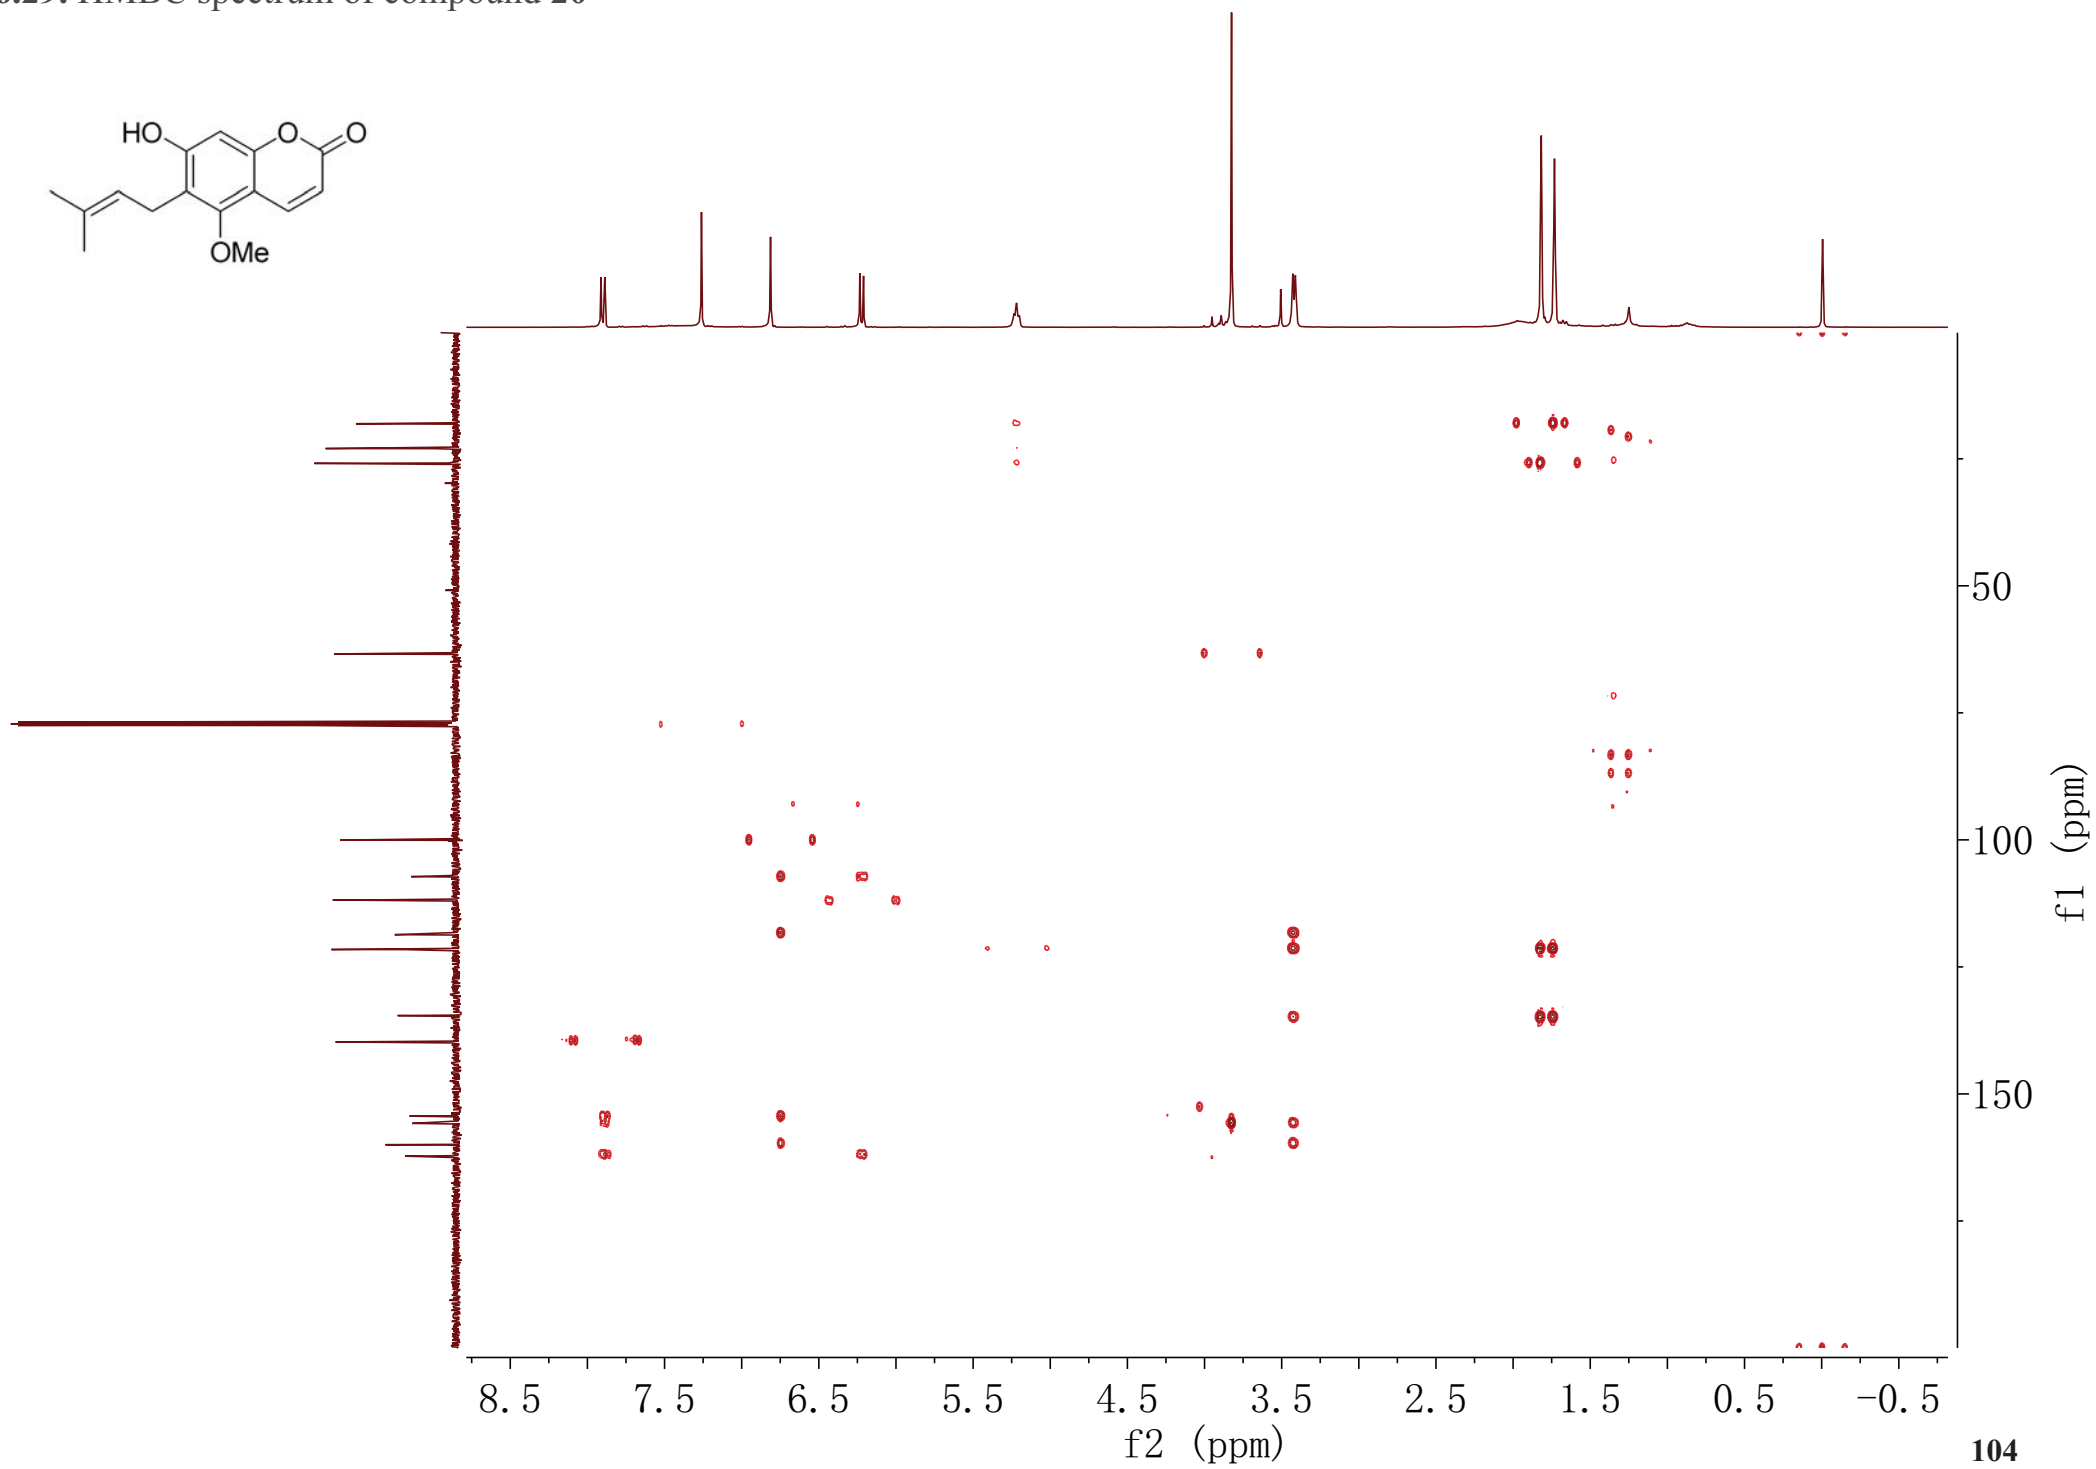



S6.30. <sup>1</sup>H NMR spectrum of compound 21

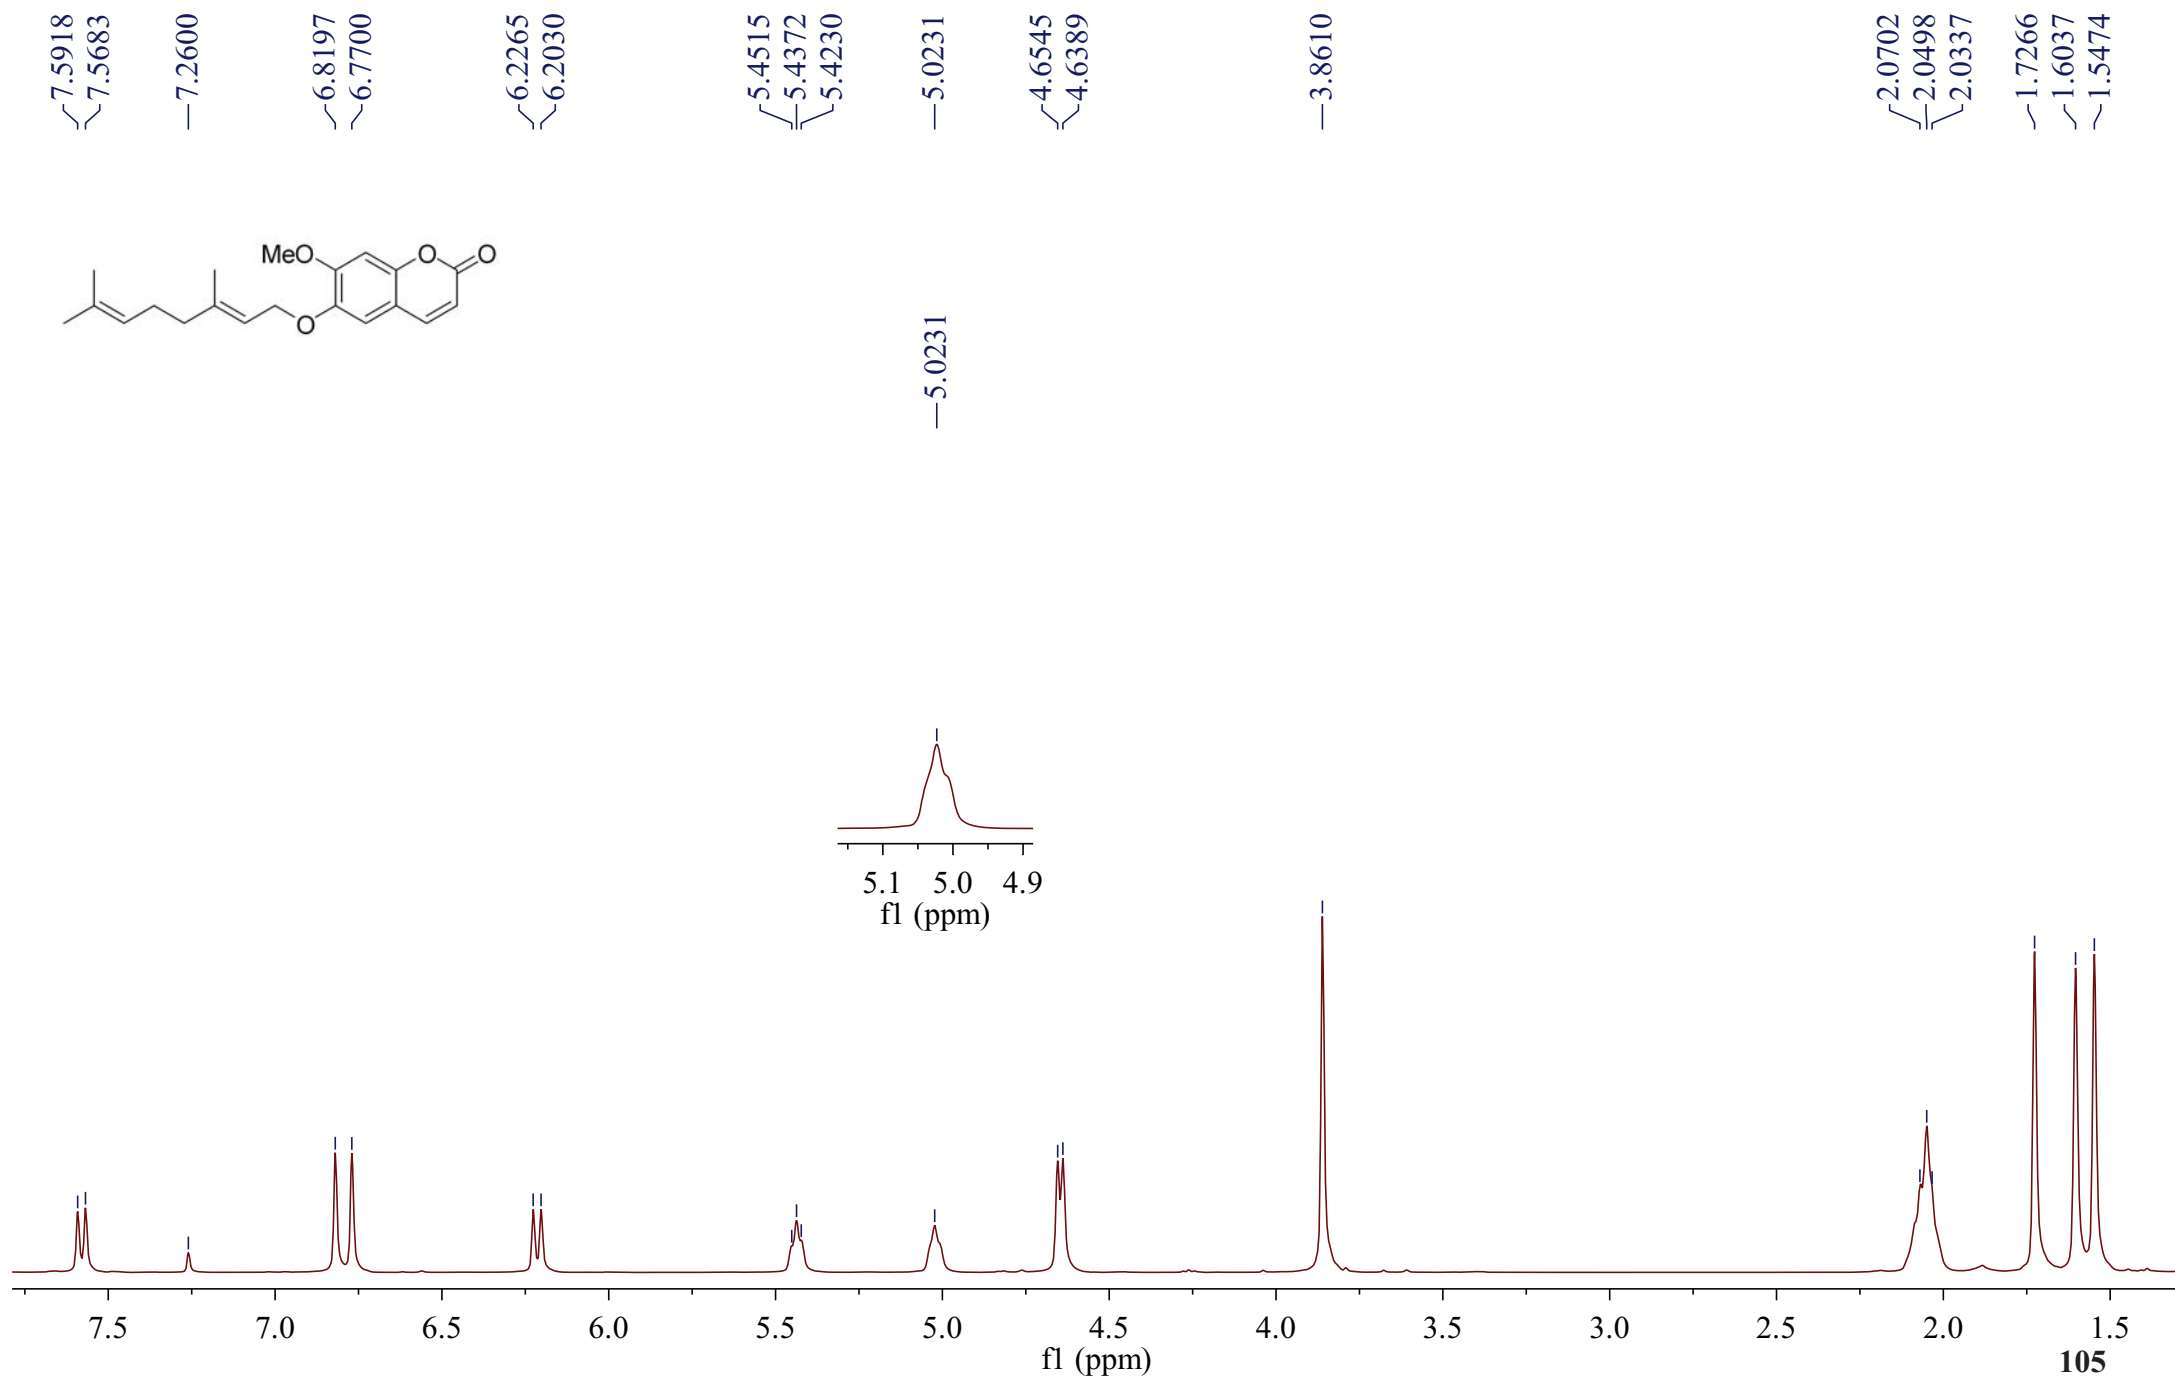

S6.31. <sup>13</sup>C NMR and DEPT spectra of compound 21

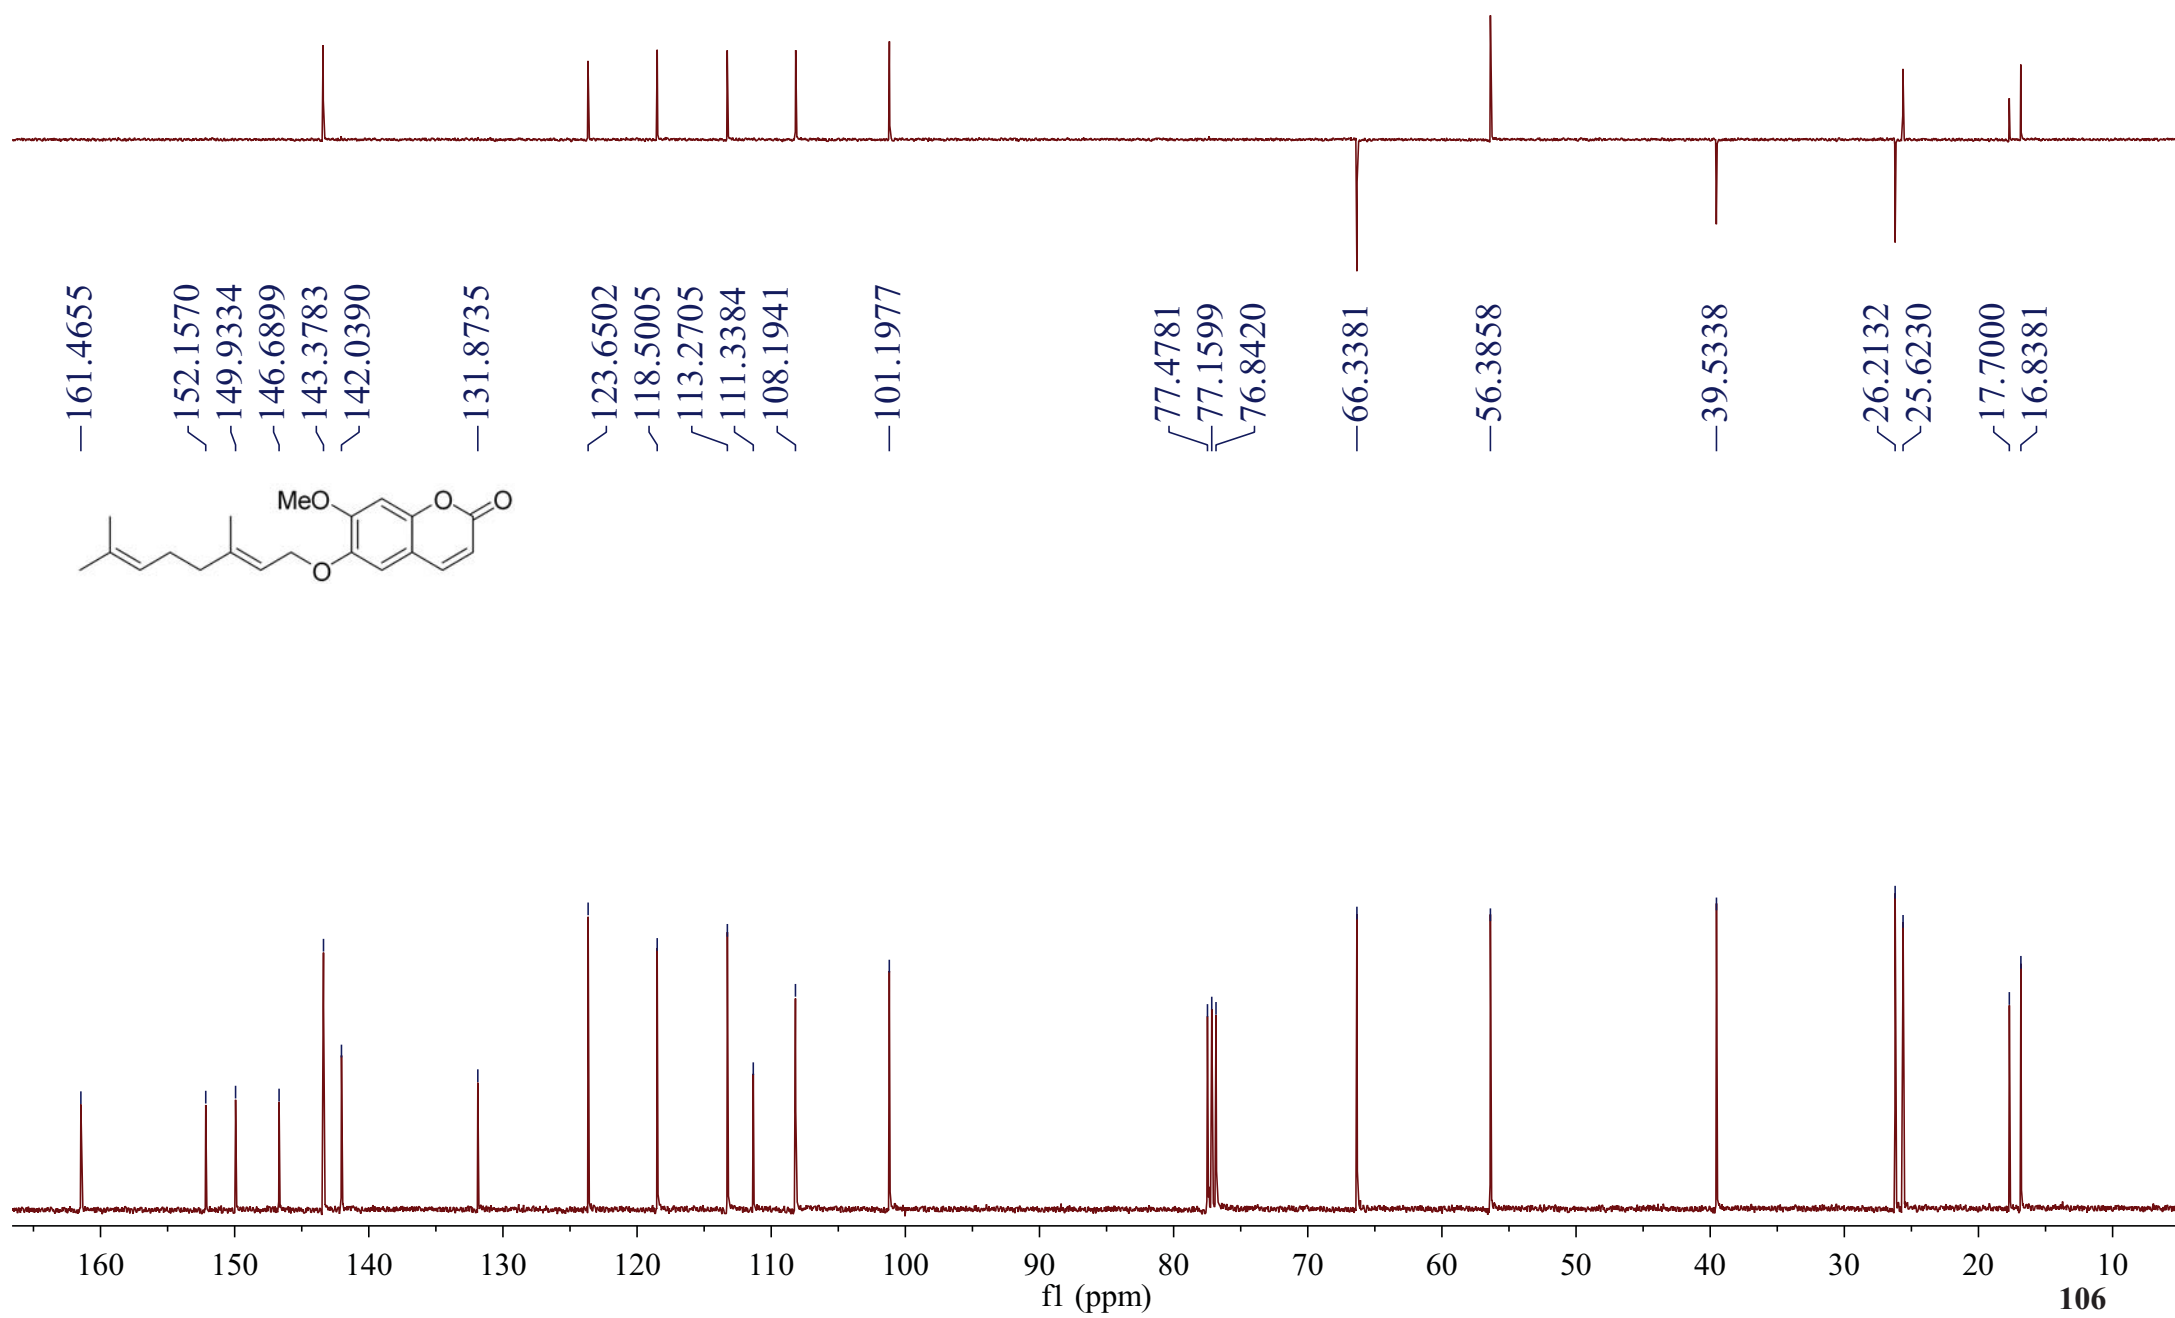

S6.32. <sup>1</sup>H NMR spectrum of compound 22

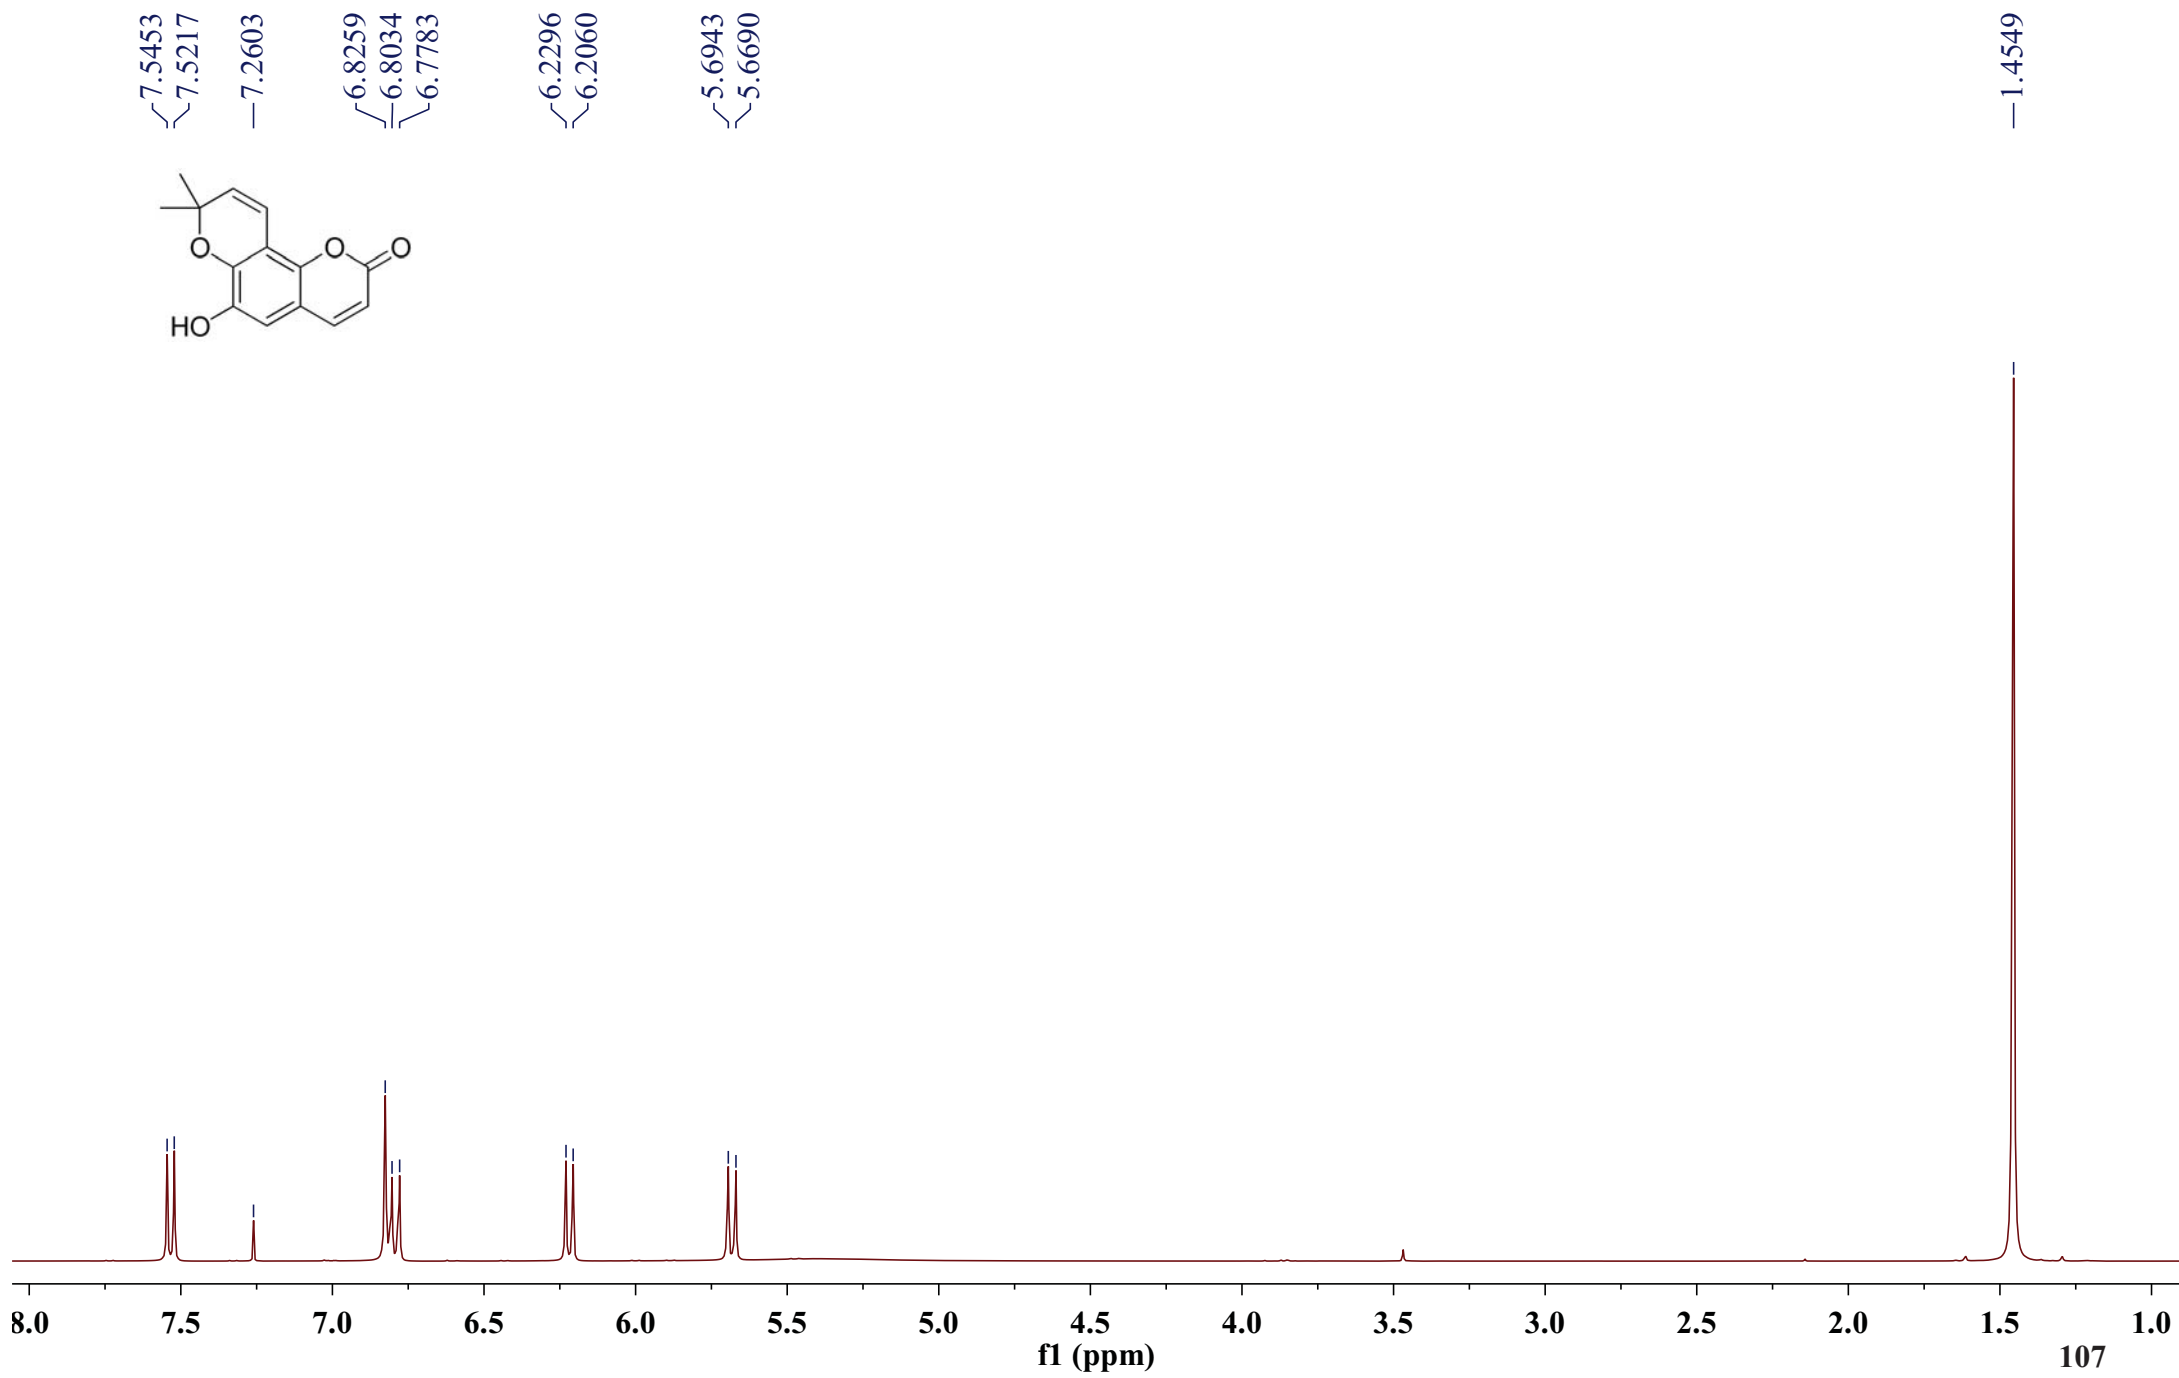

S6.33. <sup>13</sup>C NMR and DEPT spectra of compound 22

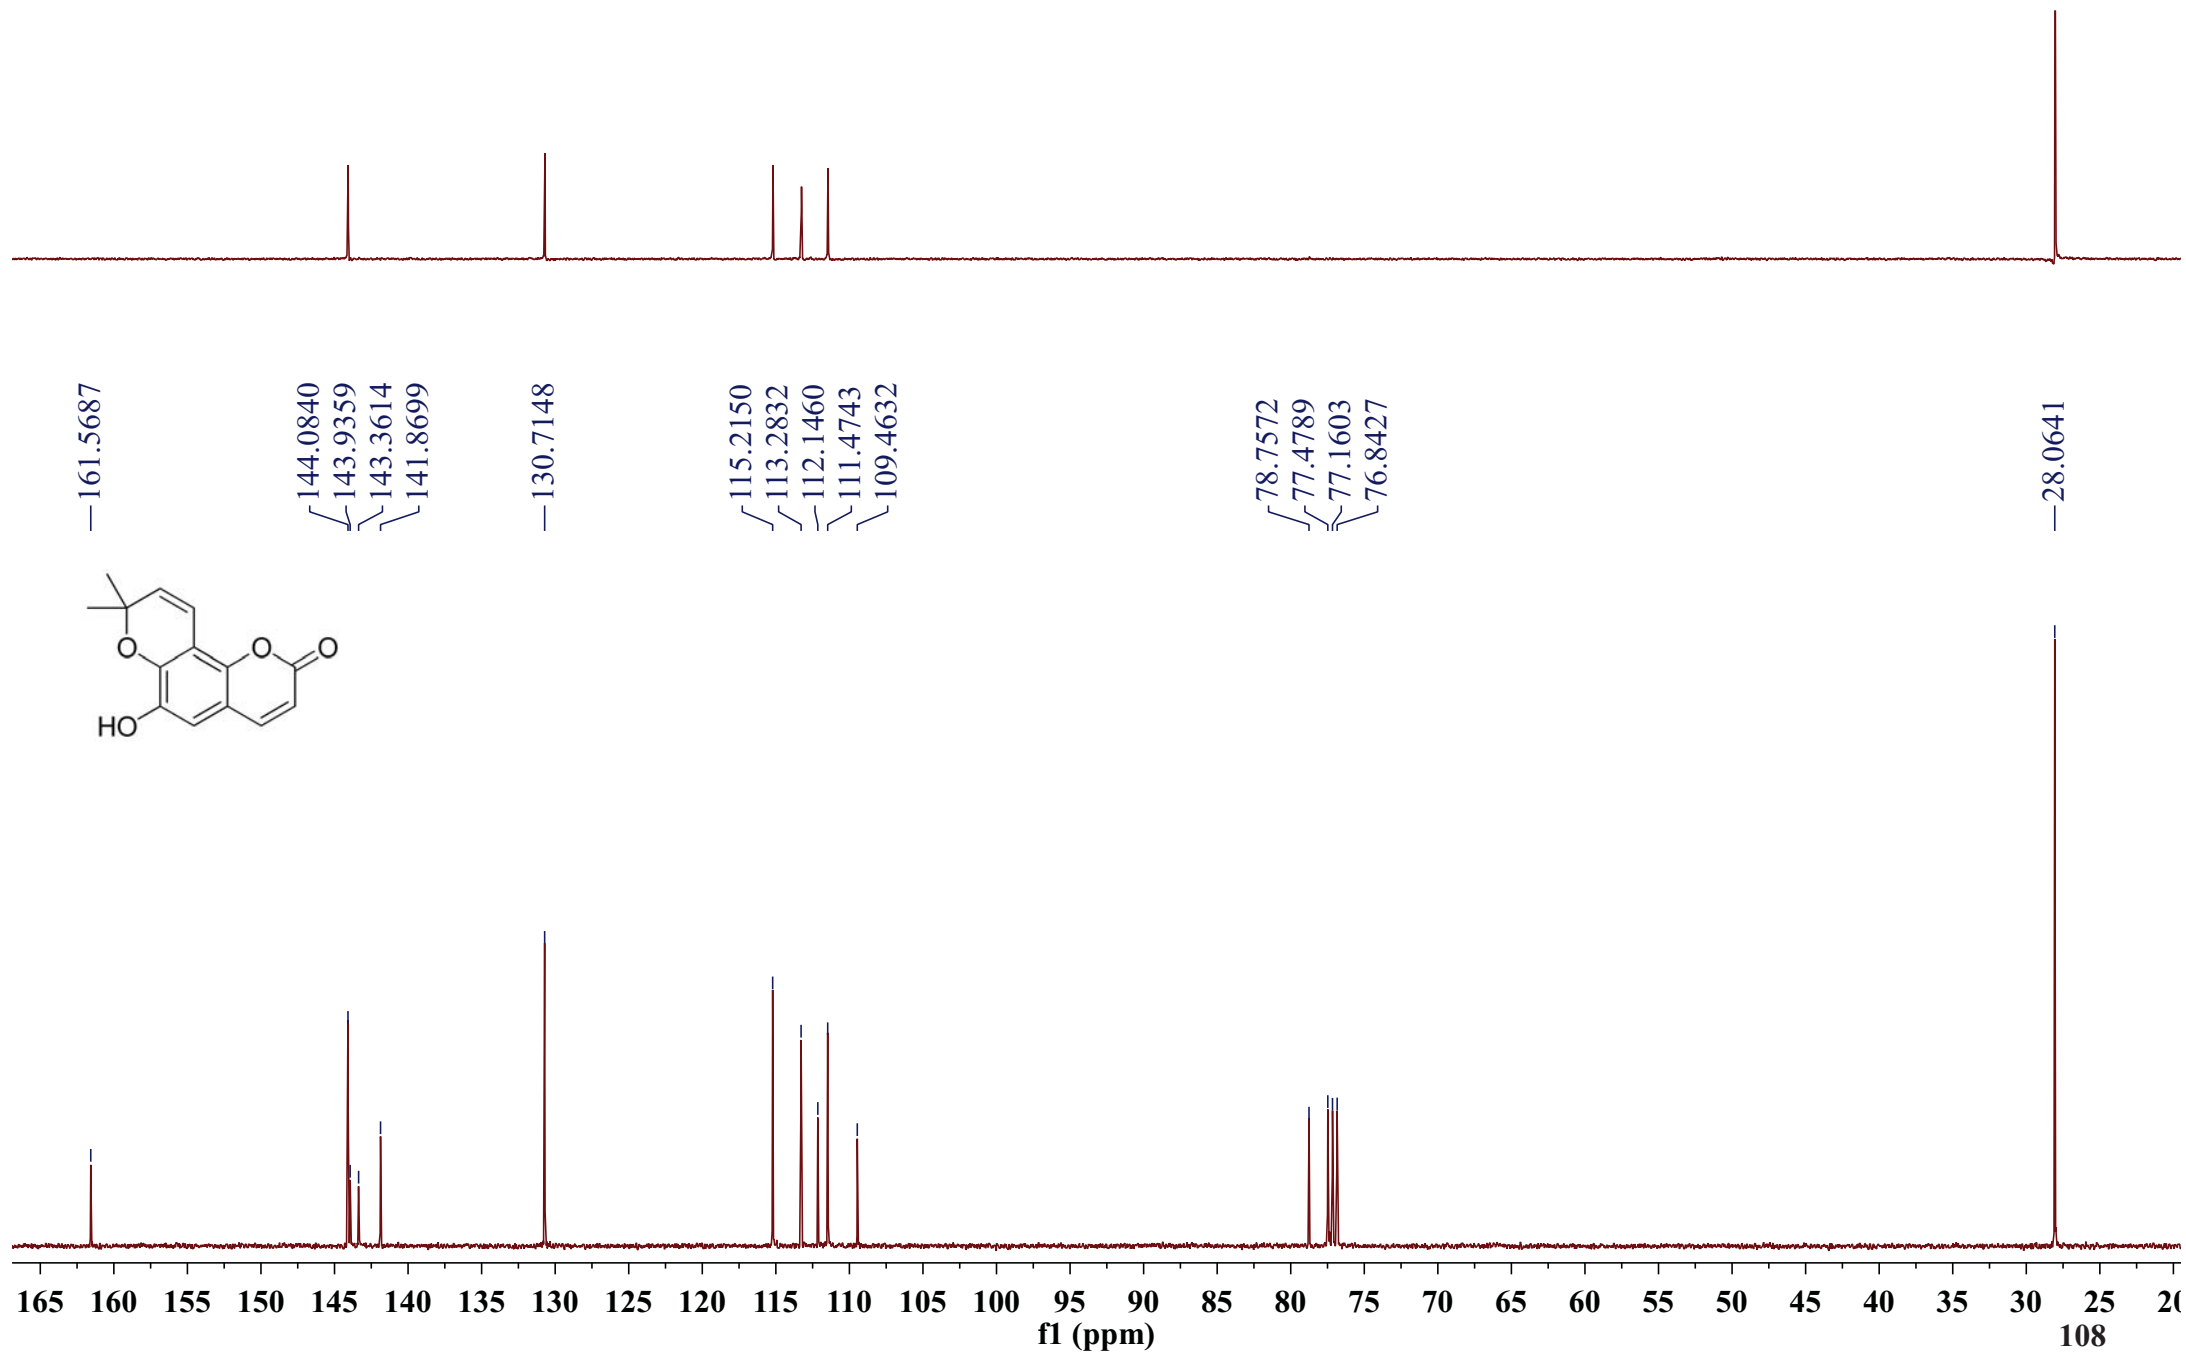

S6.34. <sup>1</sup>H NMR spectrum of compound 23

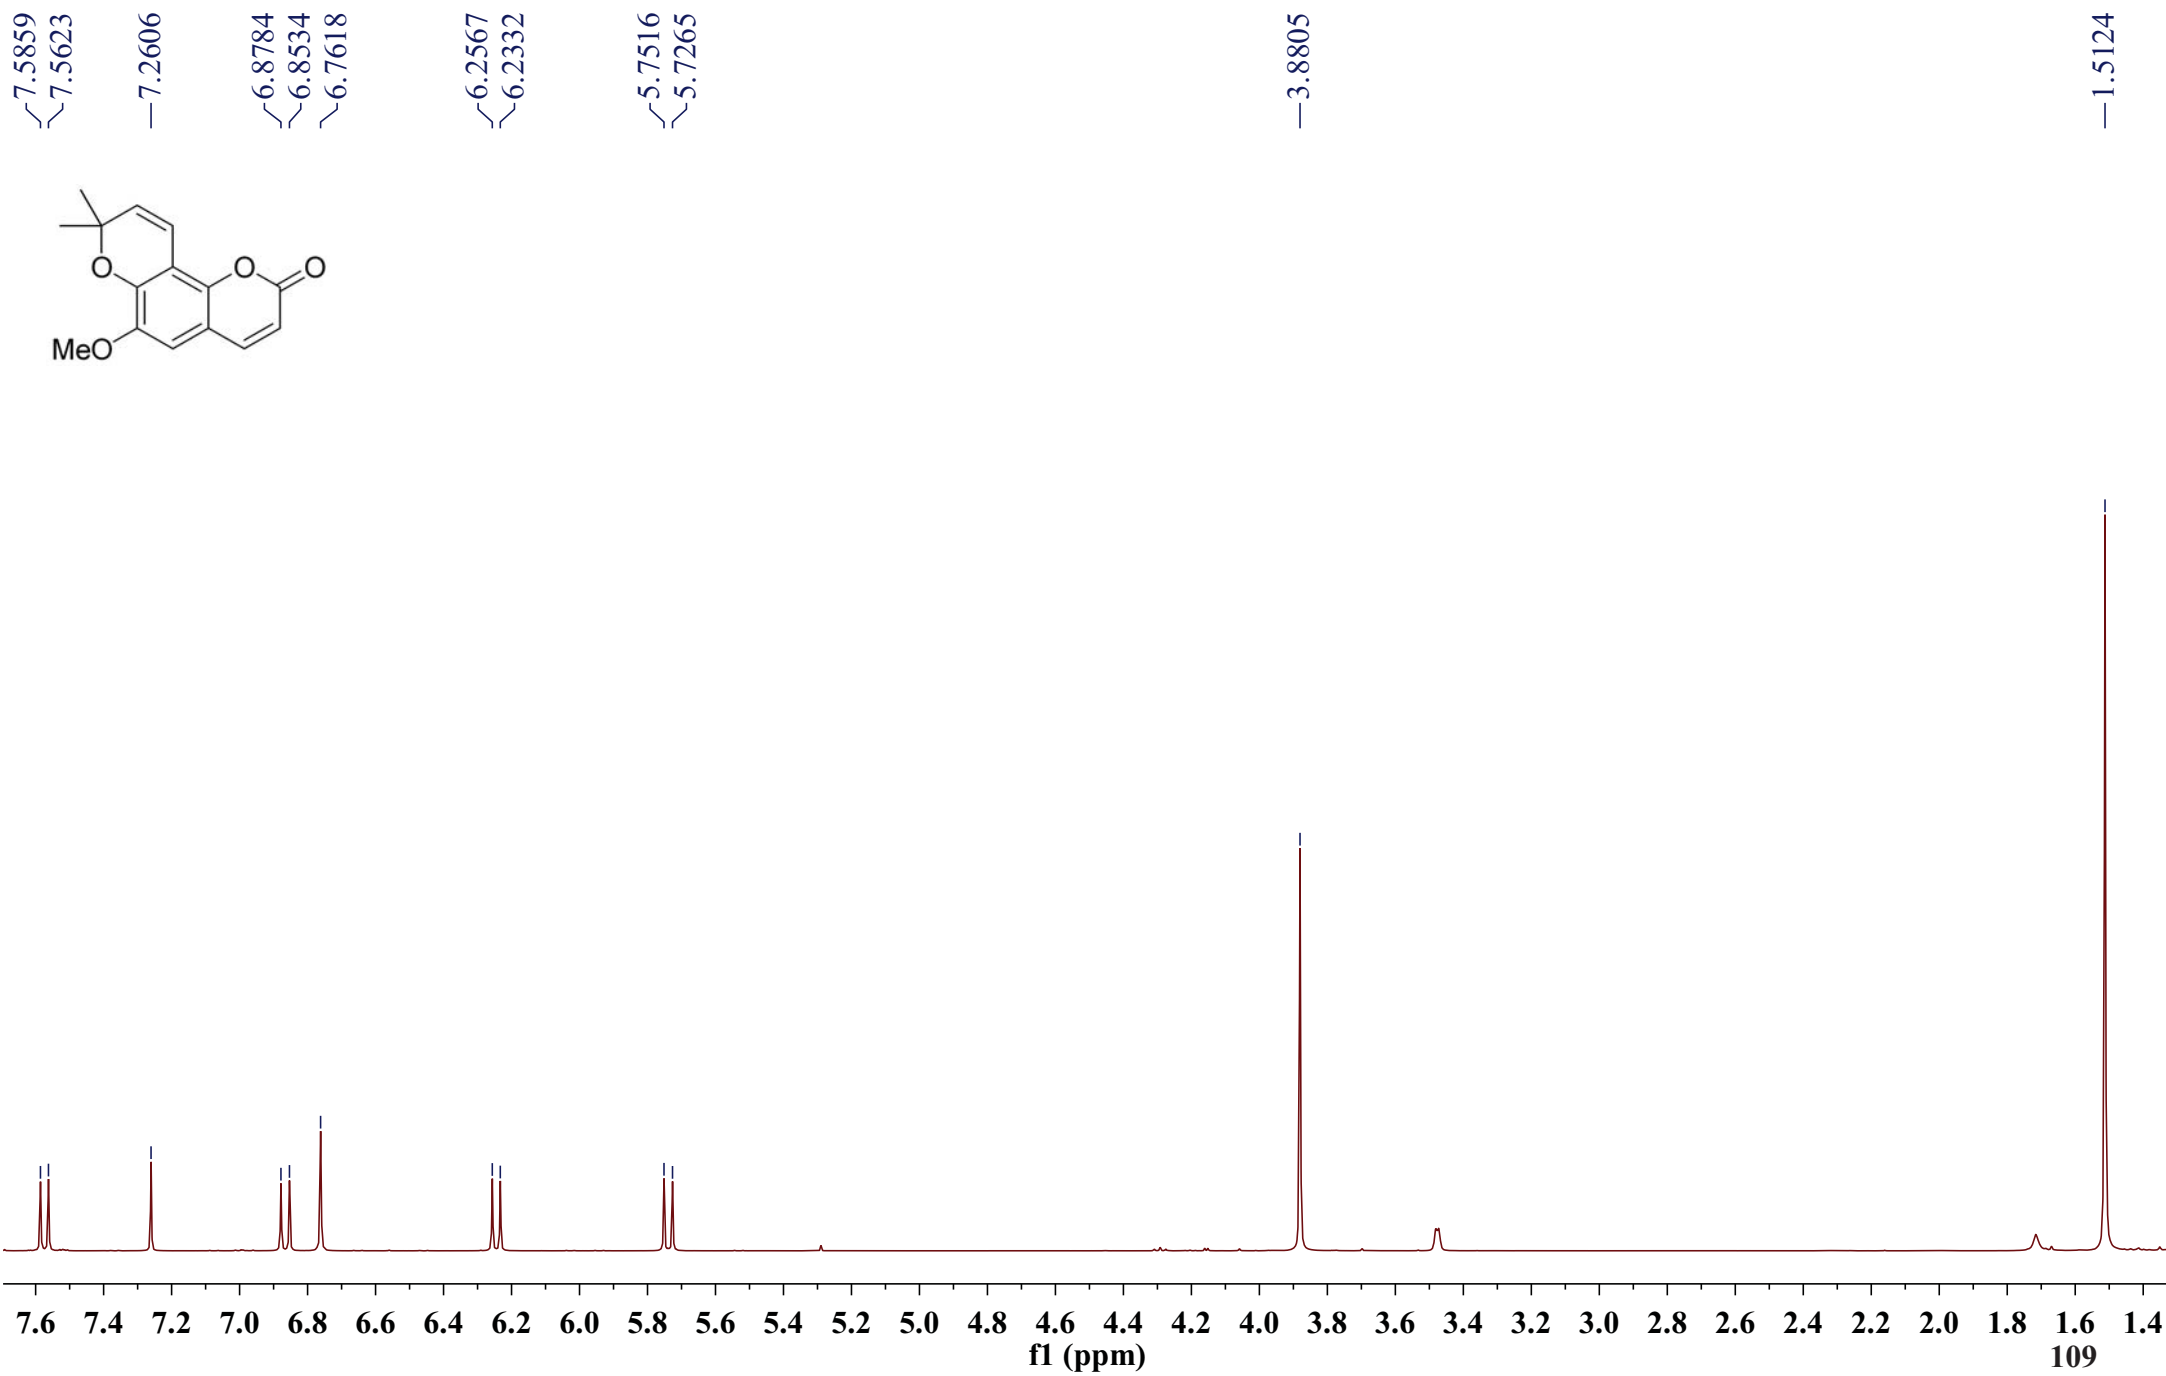

S6.35.  $^{13}\text{C}$  NMR and DEPT spectra of compound **23**

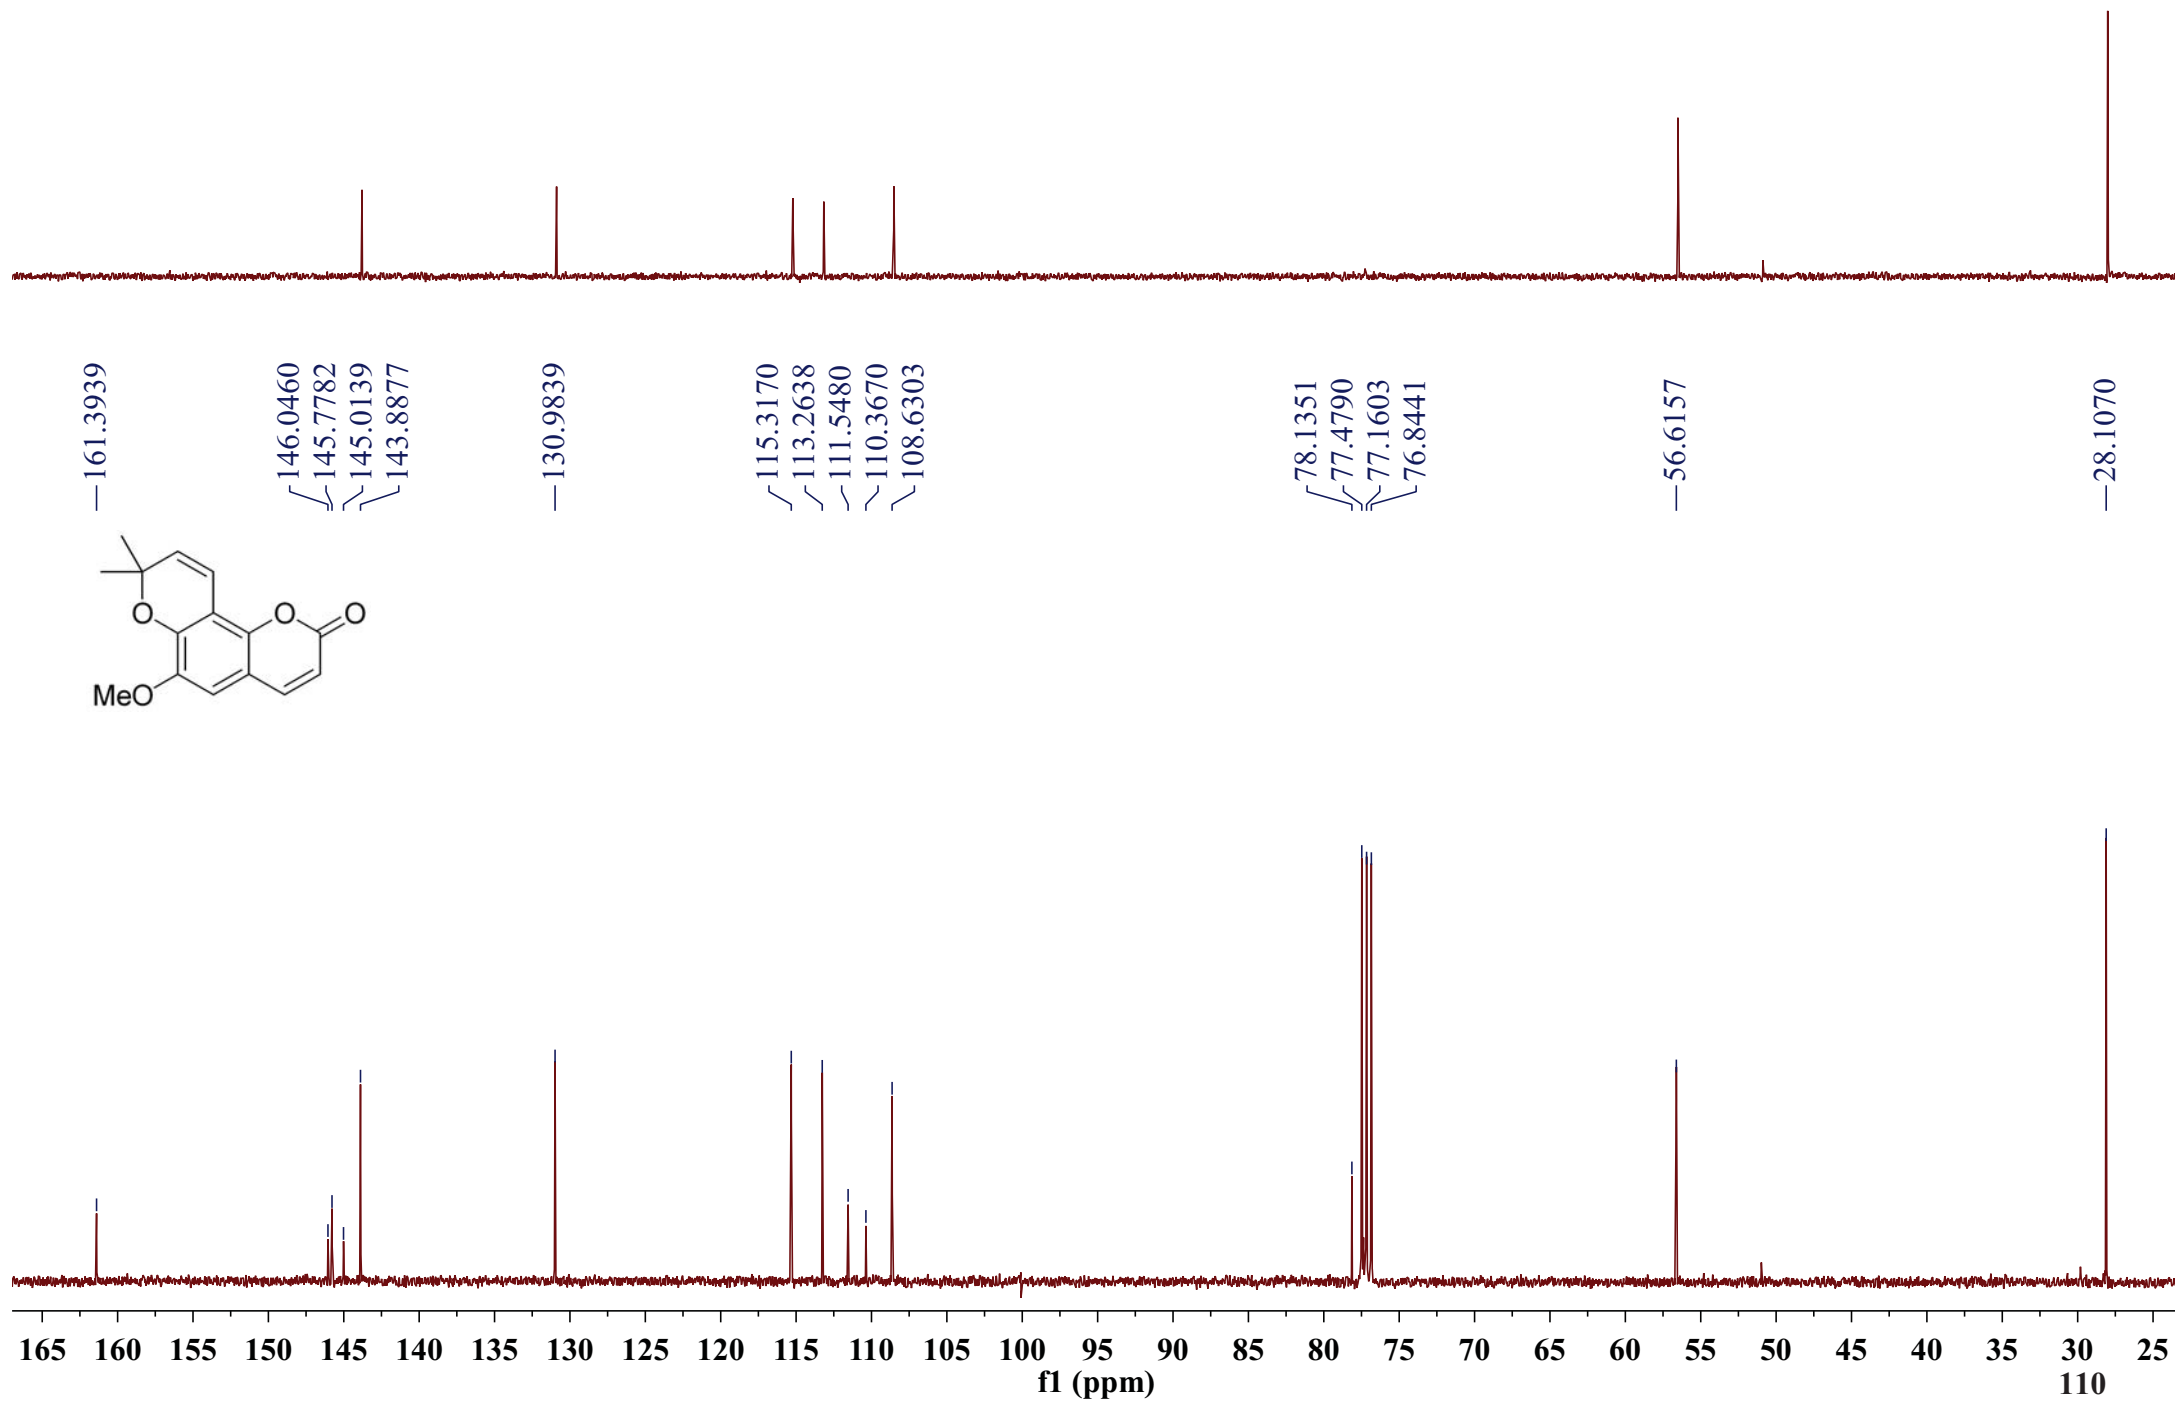

S6.36. <sup>1</sup>H NMR spectrum of compound 24

7.7254  
7.7013  
7.5943  
7.5547  
7.2597  
7.0494  
7.0256  
7.0212  
7.0051  
7.0006  
6.8840  
6.8637  
— 6.5444  
— 6.2440  
— 6.2044  
— 6.0944  
— 6.0704  
5.2869  
5.2687  
5.2594  
5.2438  
5.2310  
5.2195  
5.2132  
5.1925  
5.1860

— 4.1478  
3.9035  
3.8568  
— 3.8061  
3.5897  
— 3.5659  
3.1988  
3.1707  
3.1649  
3.1374  
2.9207  
2.9154  
2.8871  
2.8819  
2.0207  
2.0115  
1.9829  
1.9484  
1.9168  
1.9094  
1.8991  
— 1.3481  
— 1.2573

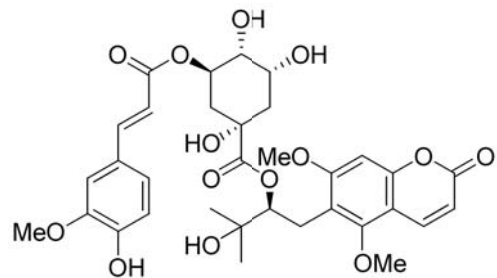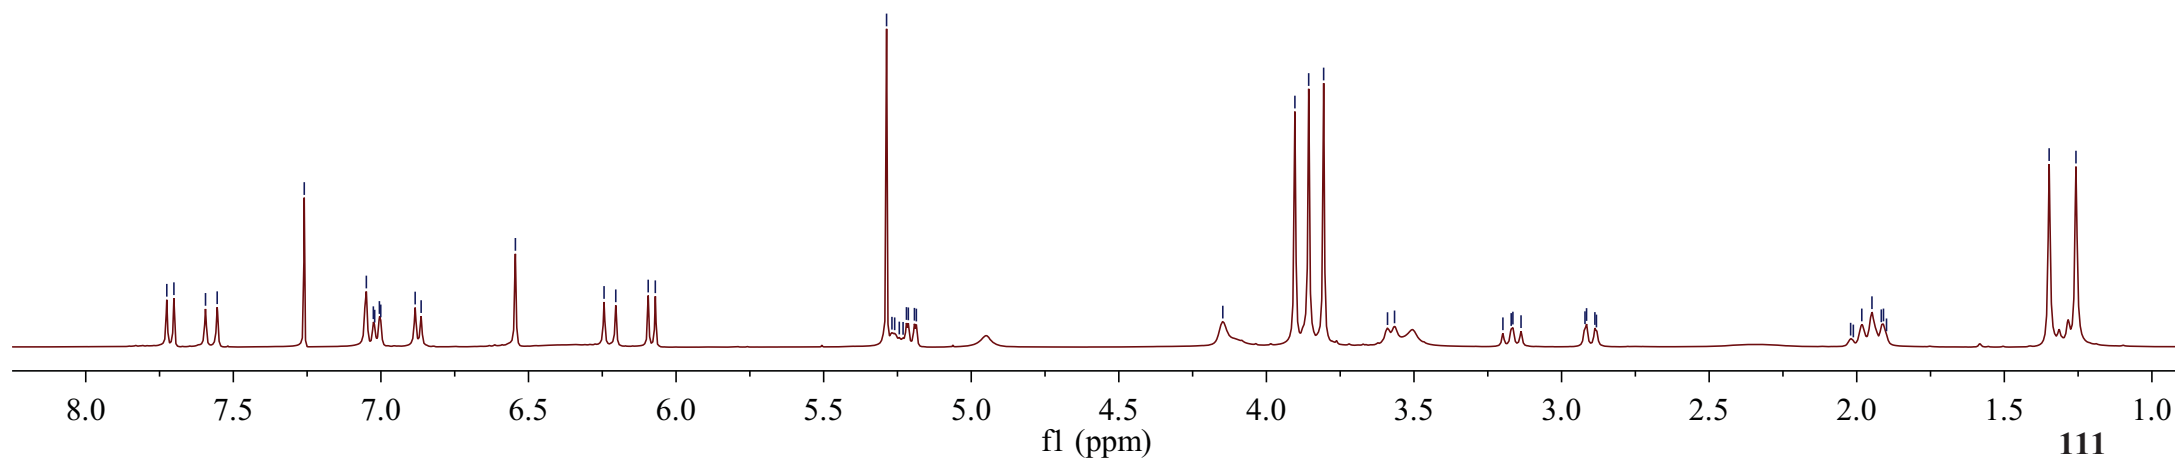

### S6.37. $^{13}\text{C}$ NMR and DEPT spectra of compound 24

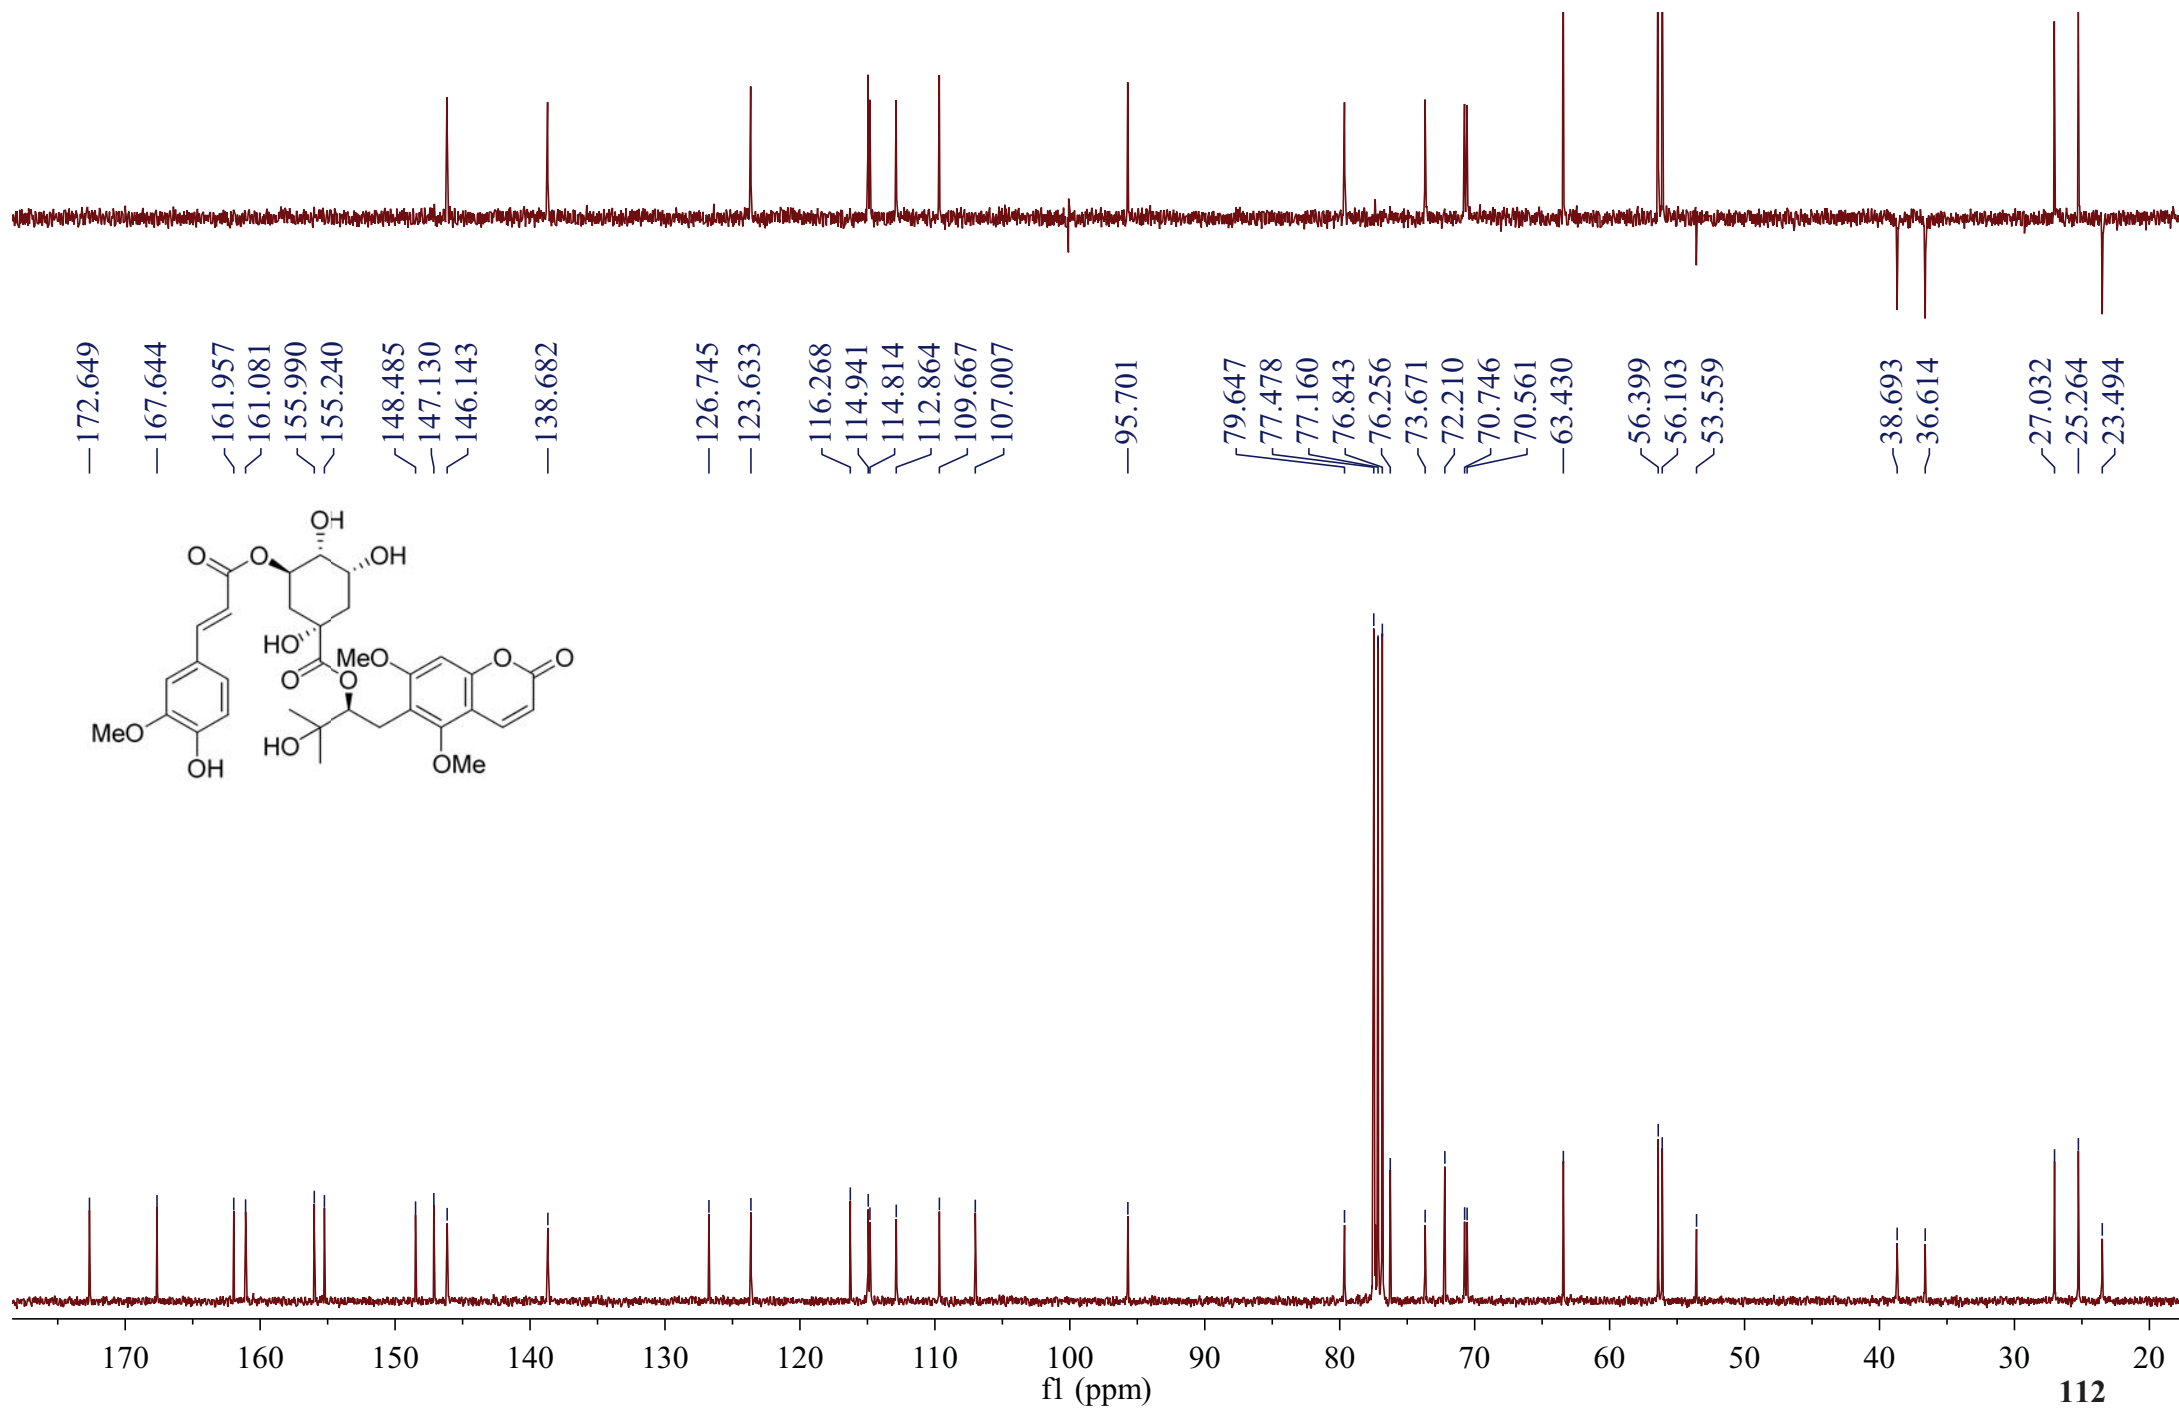

172.649  
167.644  
161.957  
161.081  
155.990  
155.240  
148.485  
147.130  
146.143  
138.682  
126.745  
123.633  
116.268  
114.941  
114.814  
112.864  
109.667  
107.007  
95.701  
79.647  
77.478  
77.160  
76.843  
76.256  
73.671  
72.210  
70.746  
70.561  
63.430  
56.399  
56.103  
53.559  
38.693  
36.614  
27.032  
25.264  
23.494

f1 (ppm)



S6.38. <sup>1</sup>H NMR spectrum of compound 24

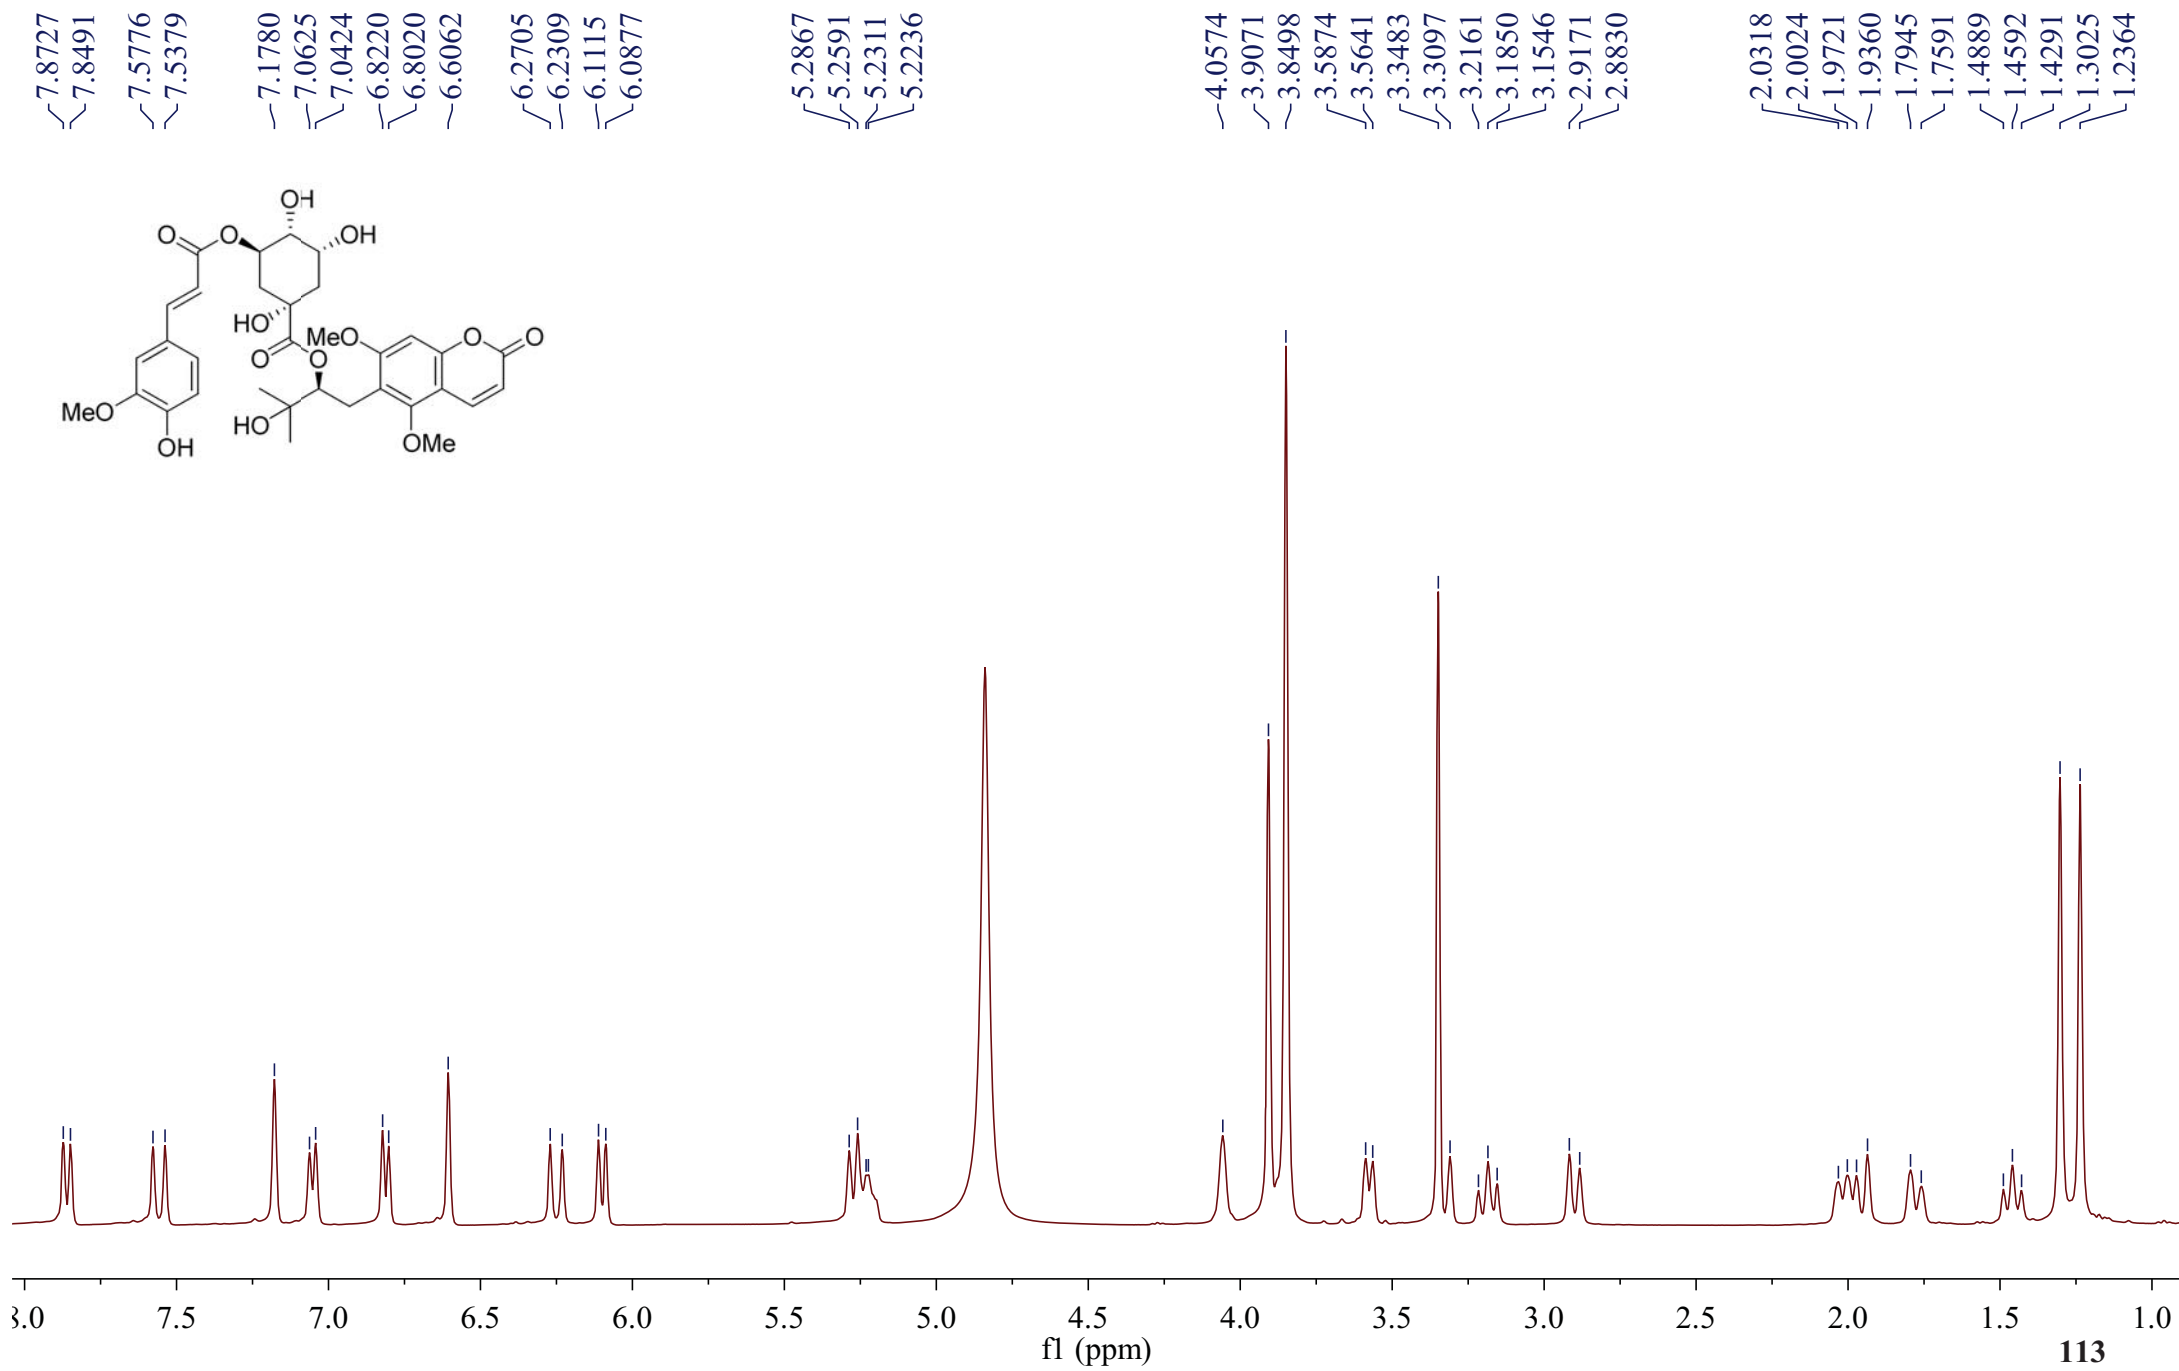

S6.39. <sup>13</sup>C NMR and spectra of compound 24

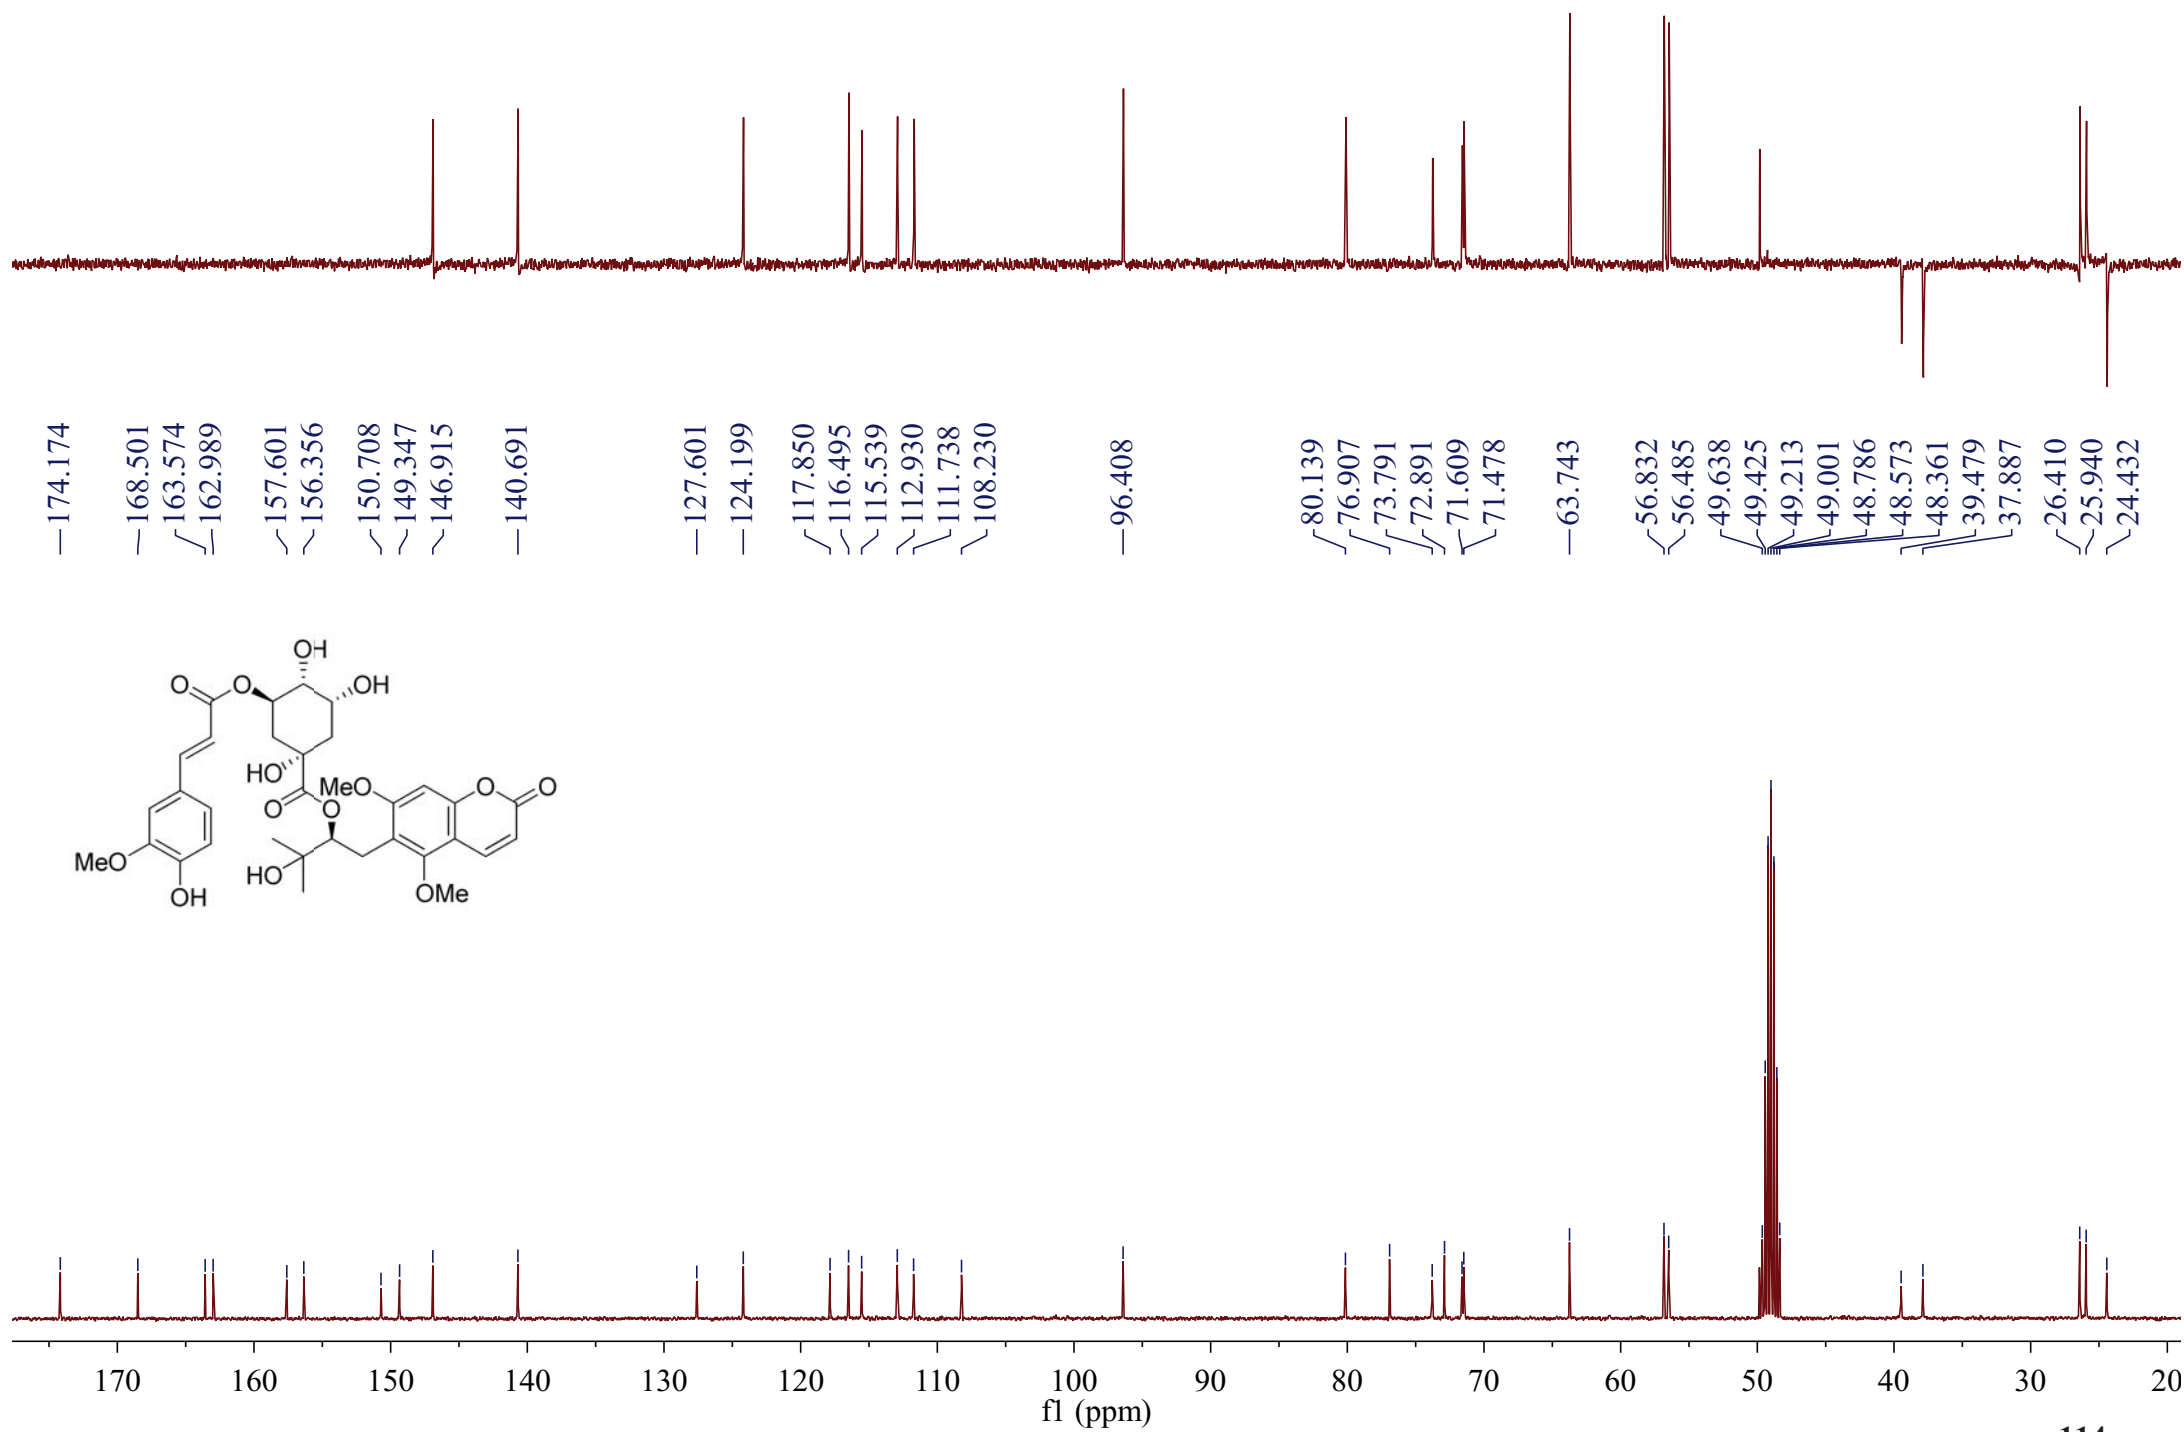

S6.40.  $^1\text{H}$  NMR spectrum of compound **25**

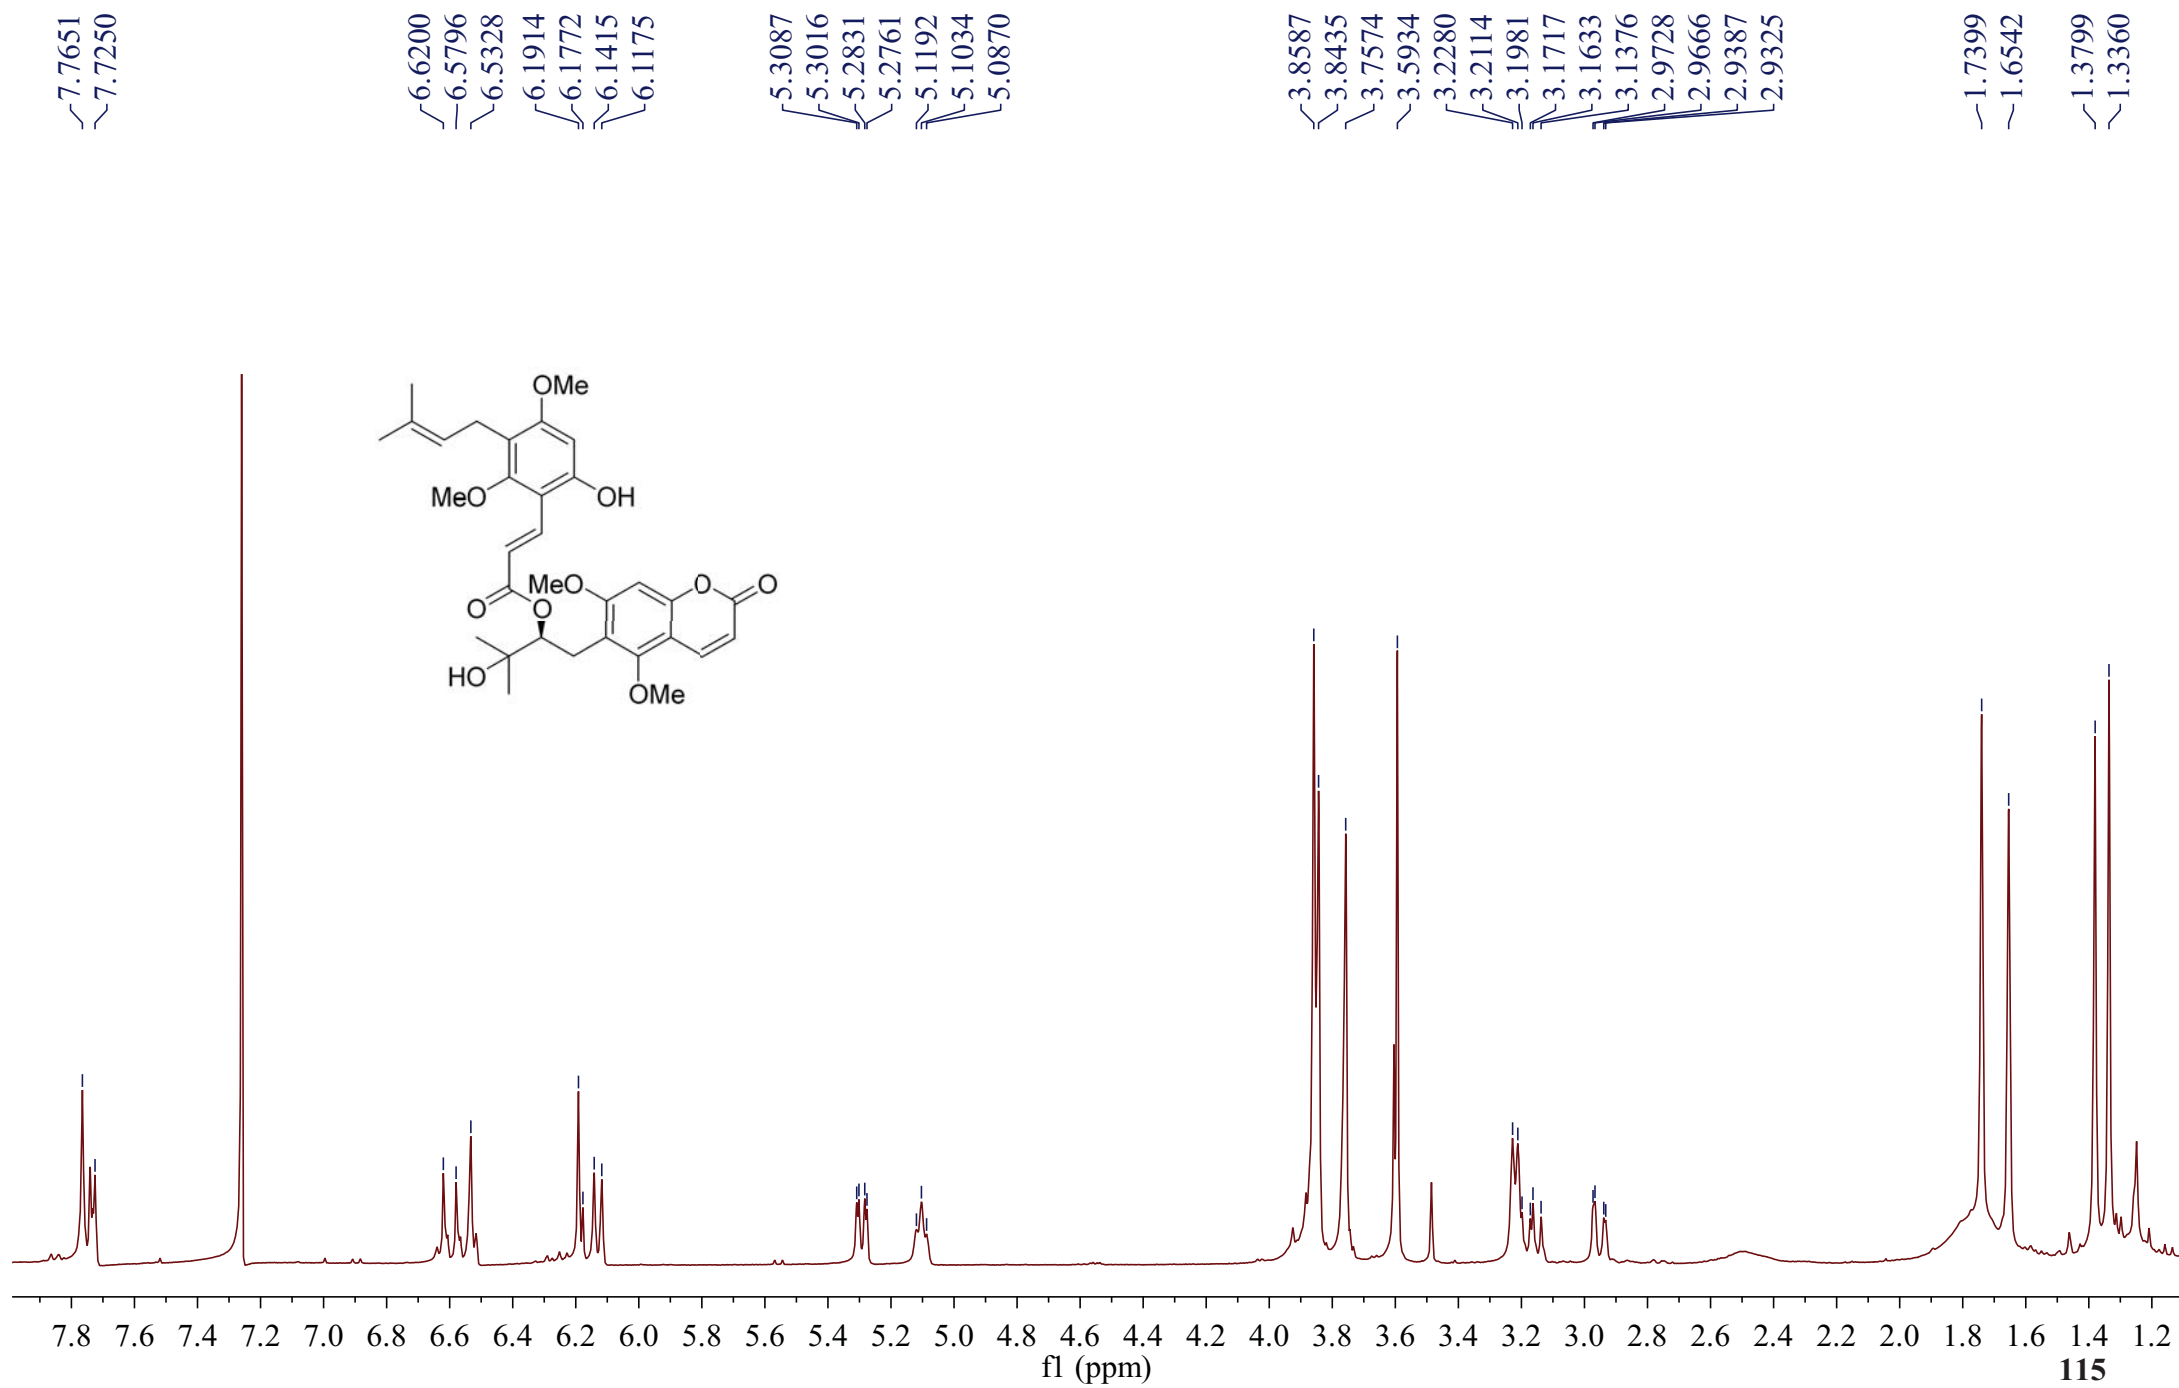

S6.41.  $^{13}\text{C}$  NMR and DEPT spectra of compound **25**

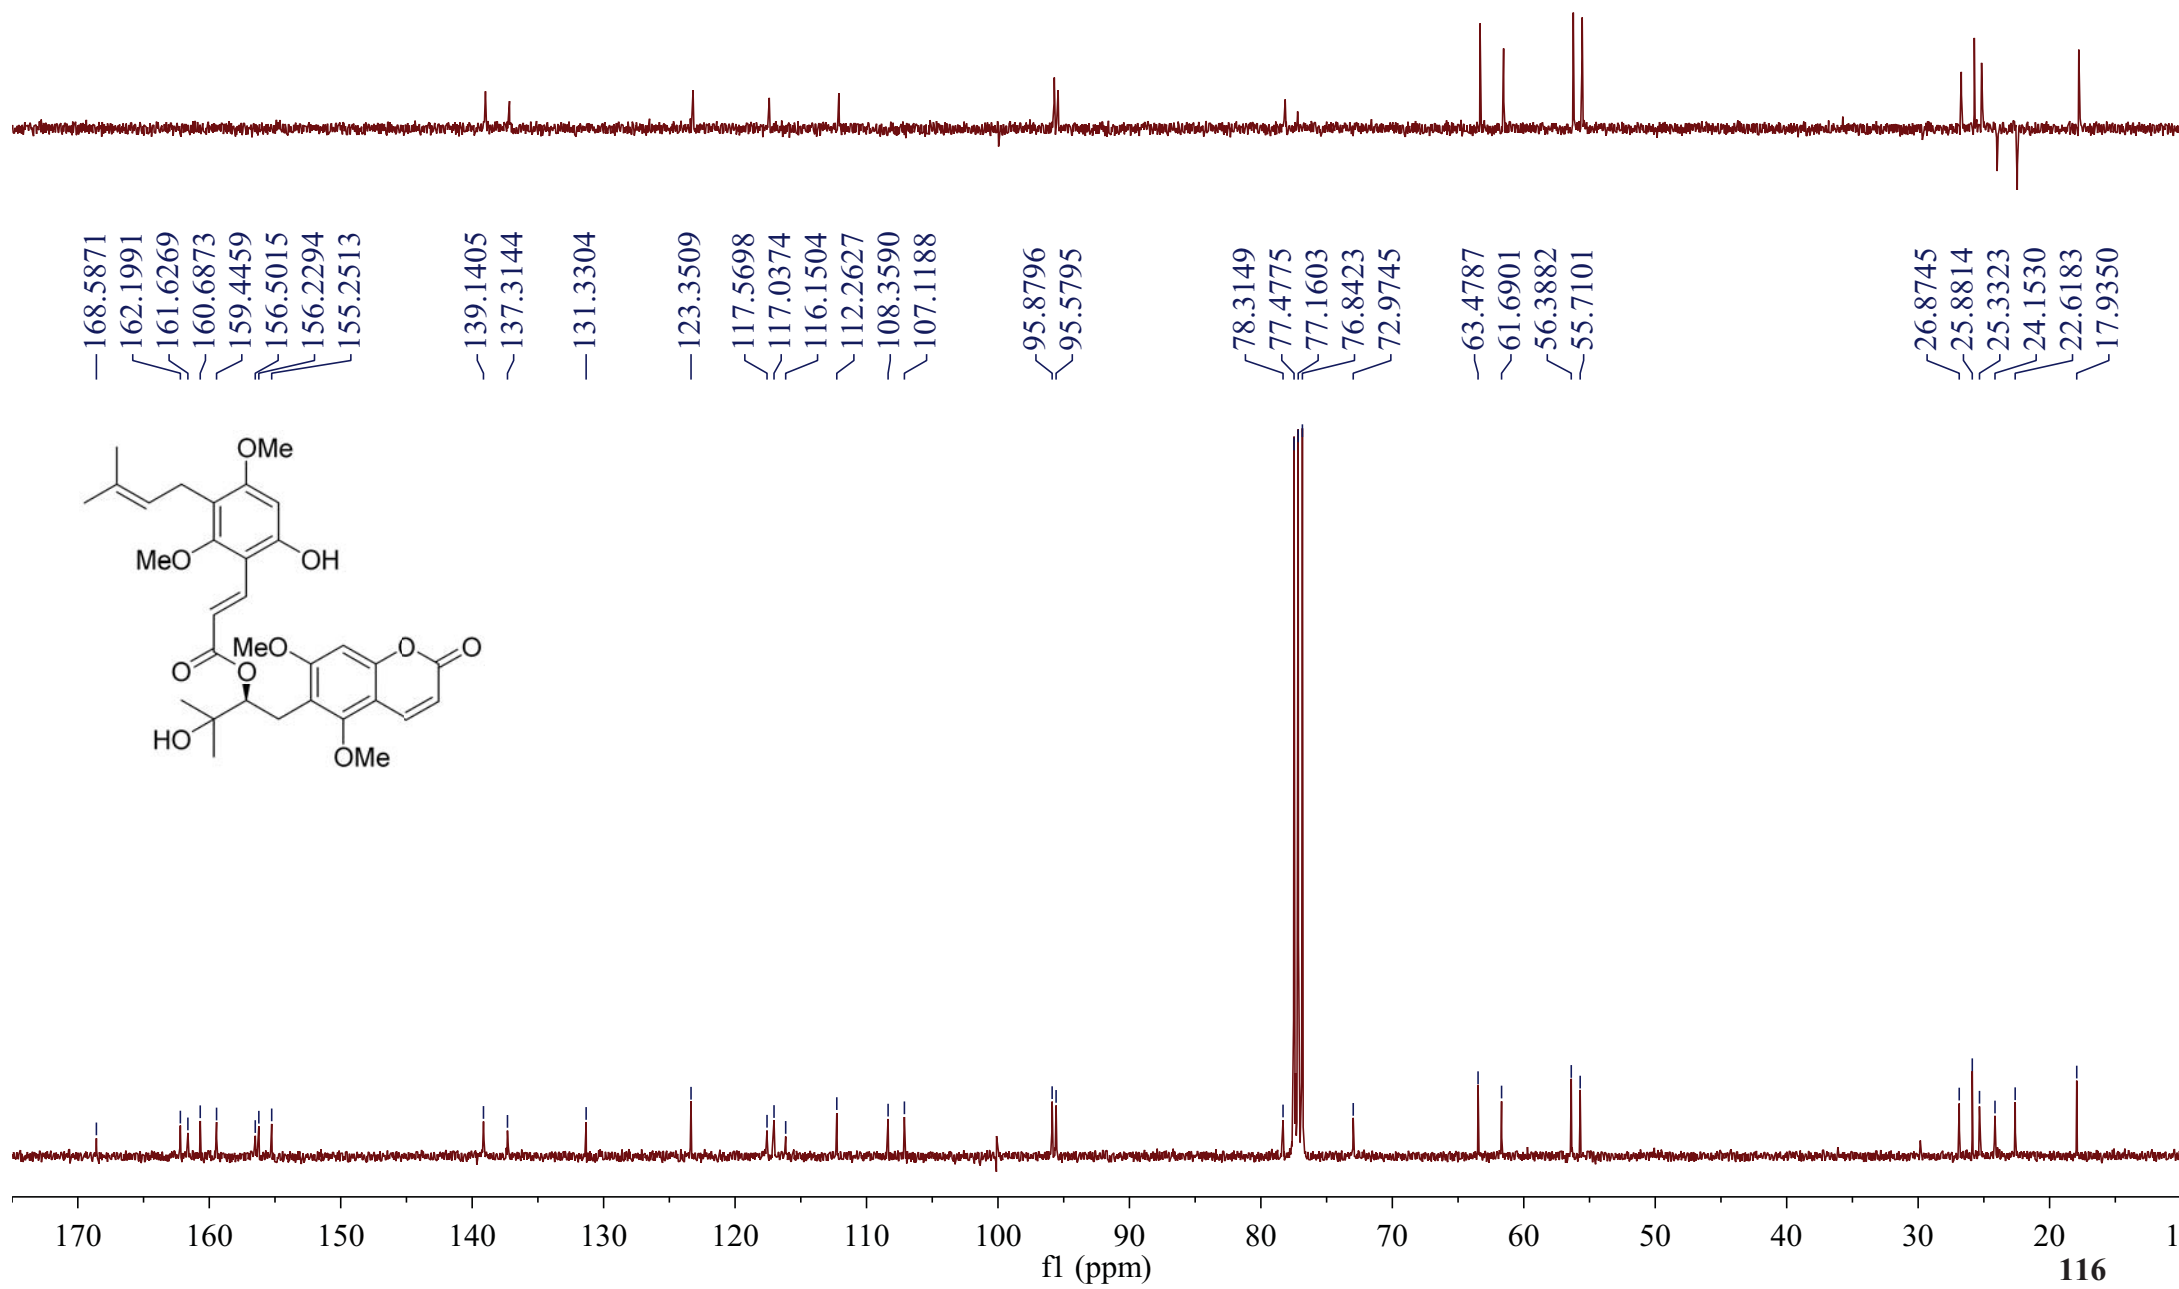

S6.42. <sup>1</sup>H NMR spectrum of compound 26

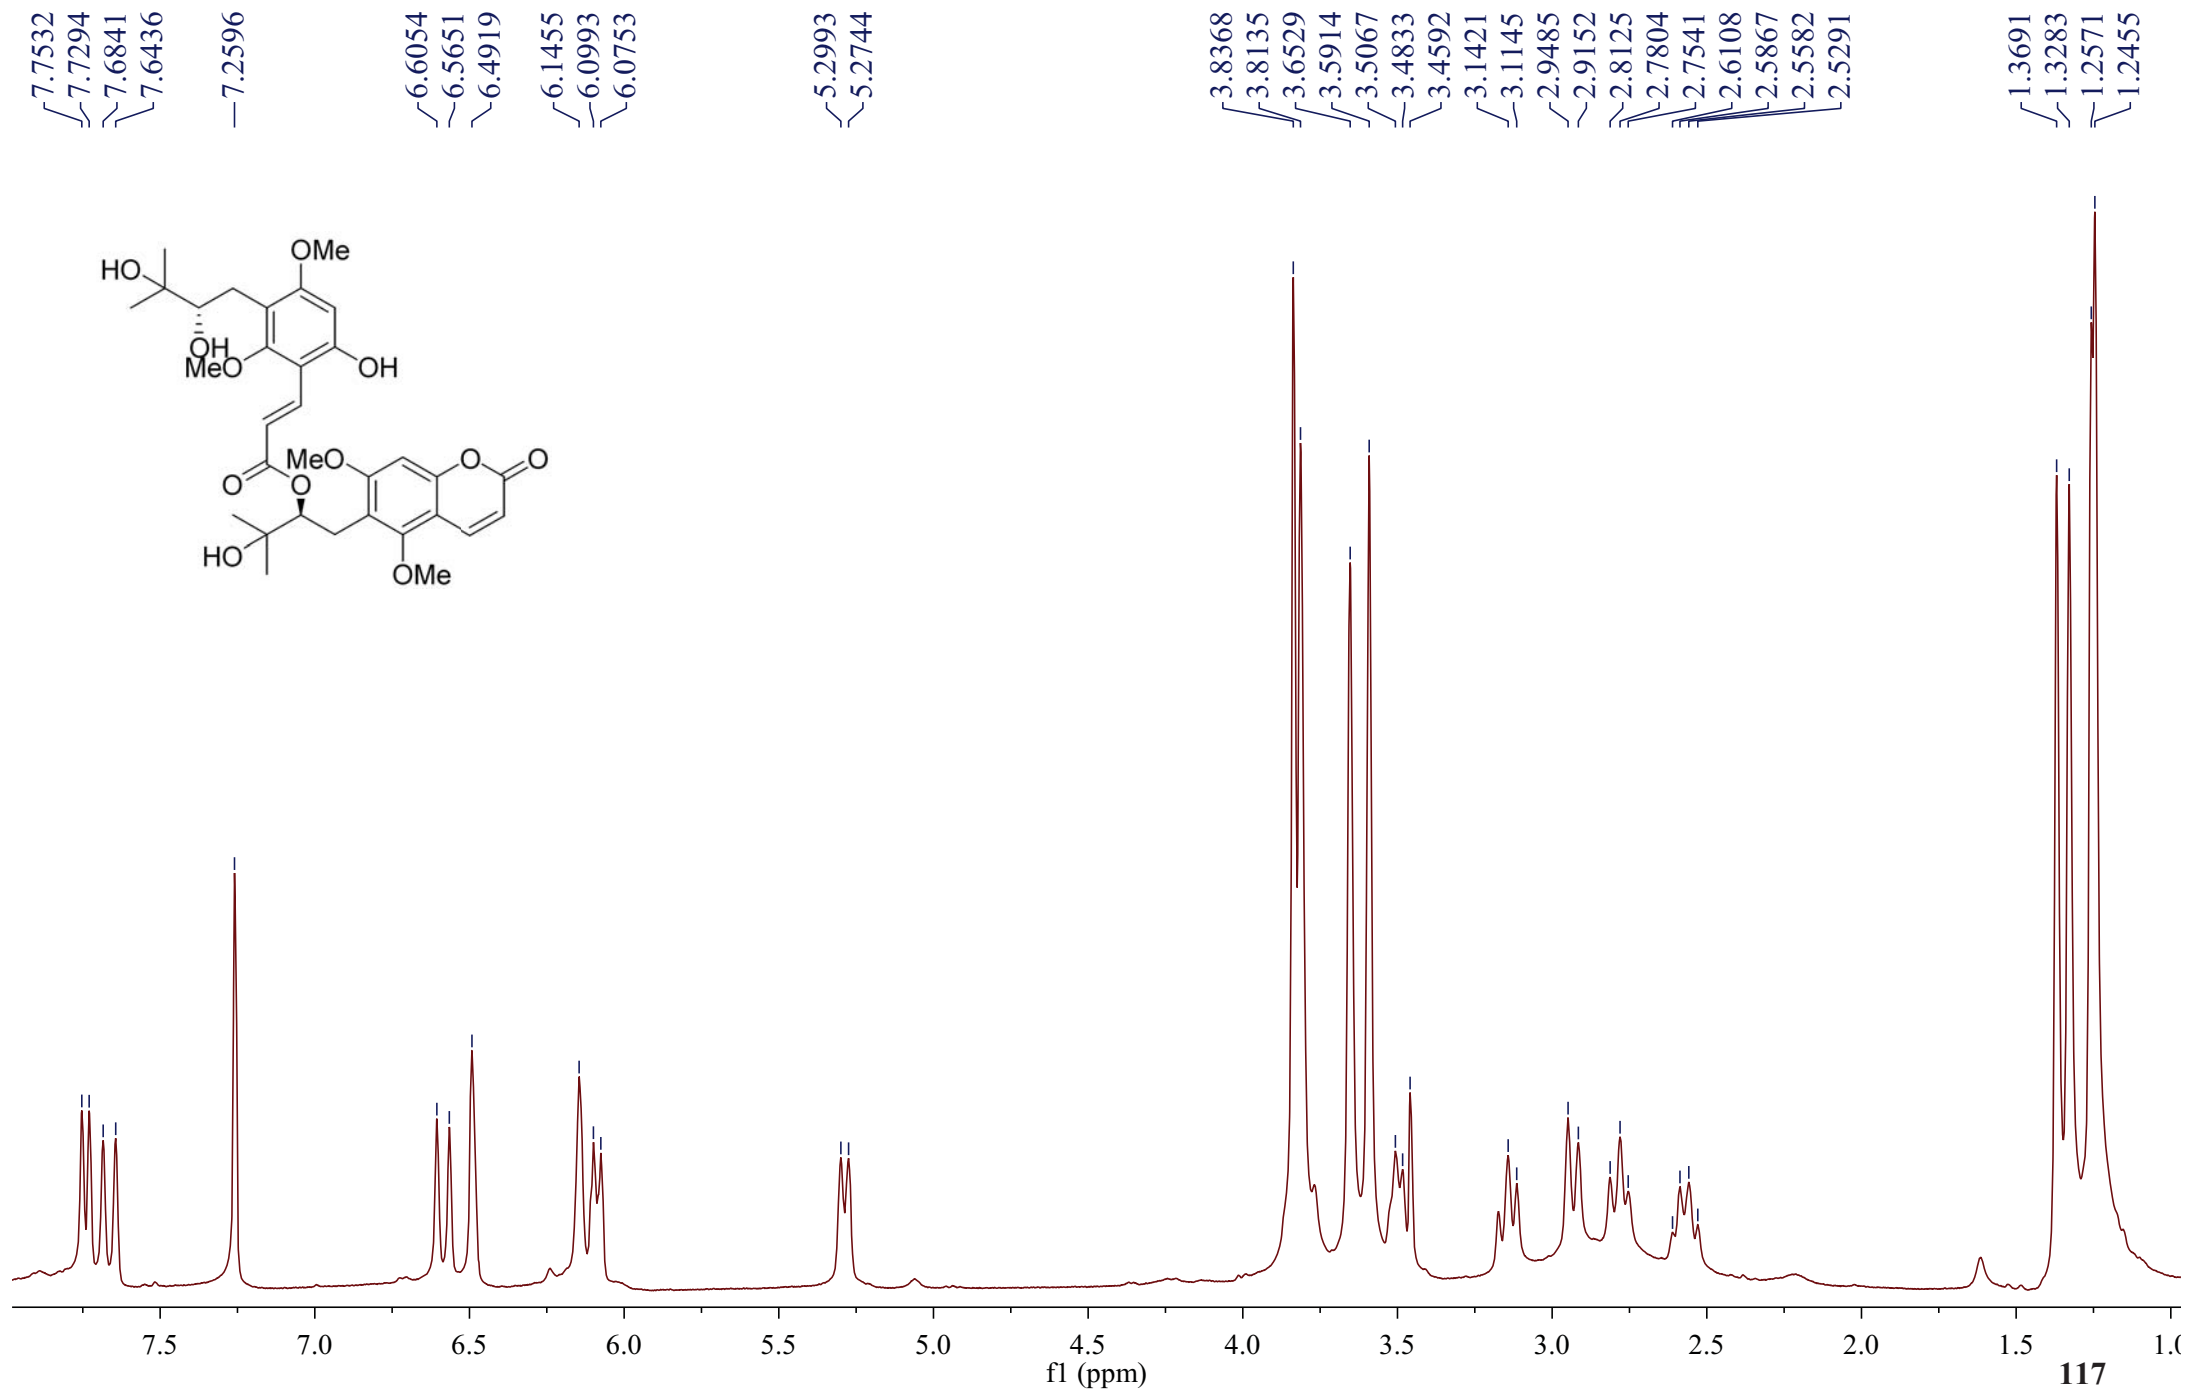

S6.43.  $^{13}\text{C}$  NMR and DEPT spectra of compound **26**

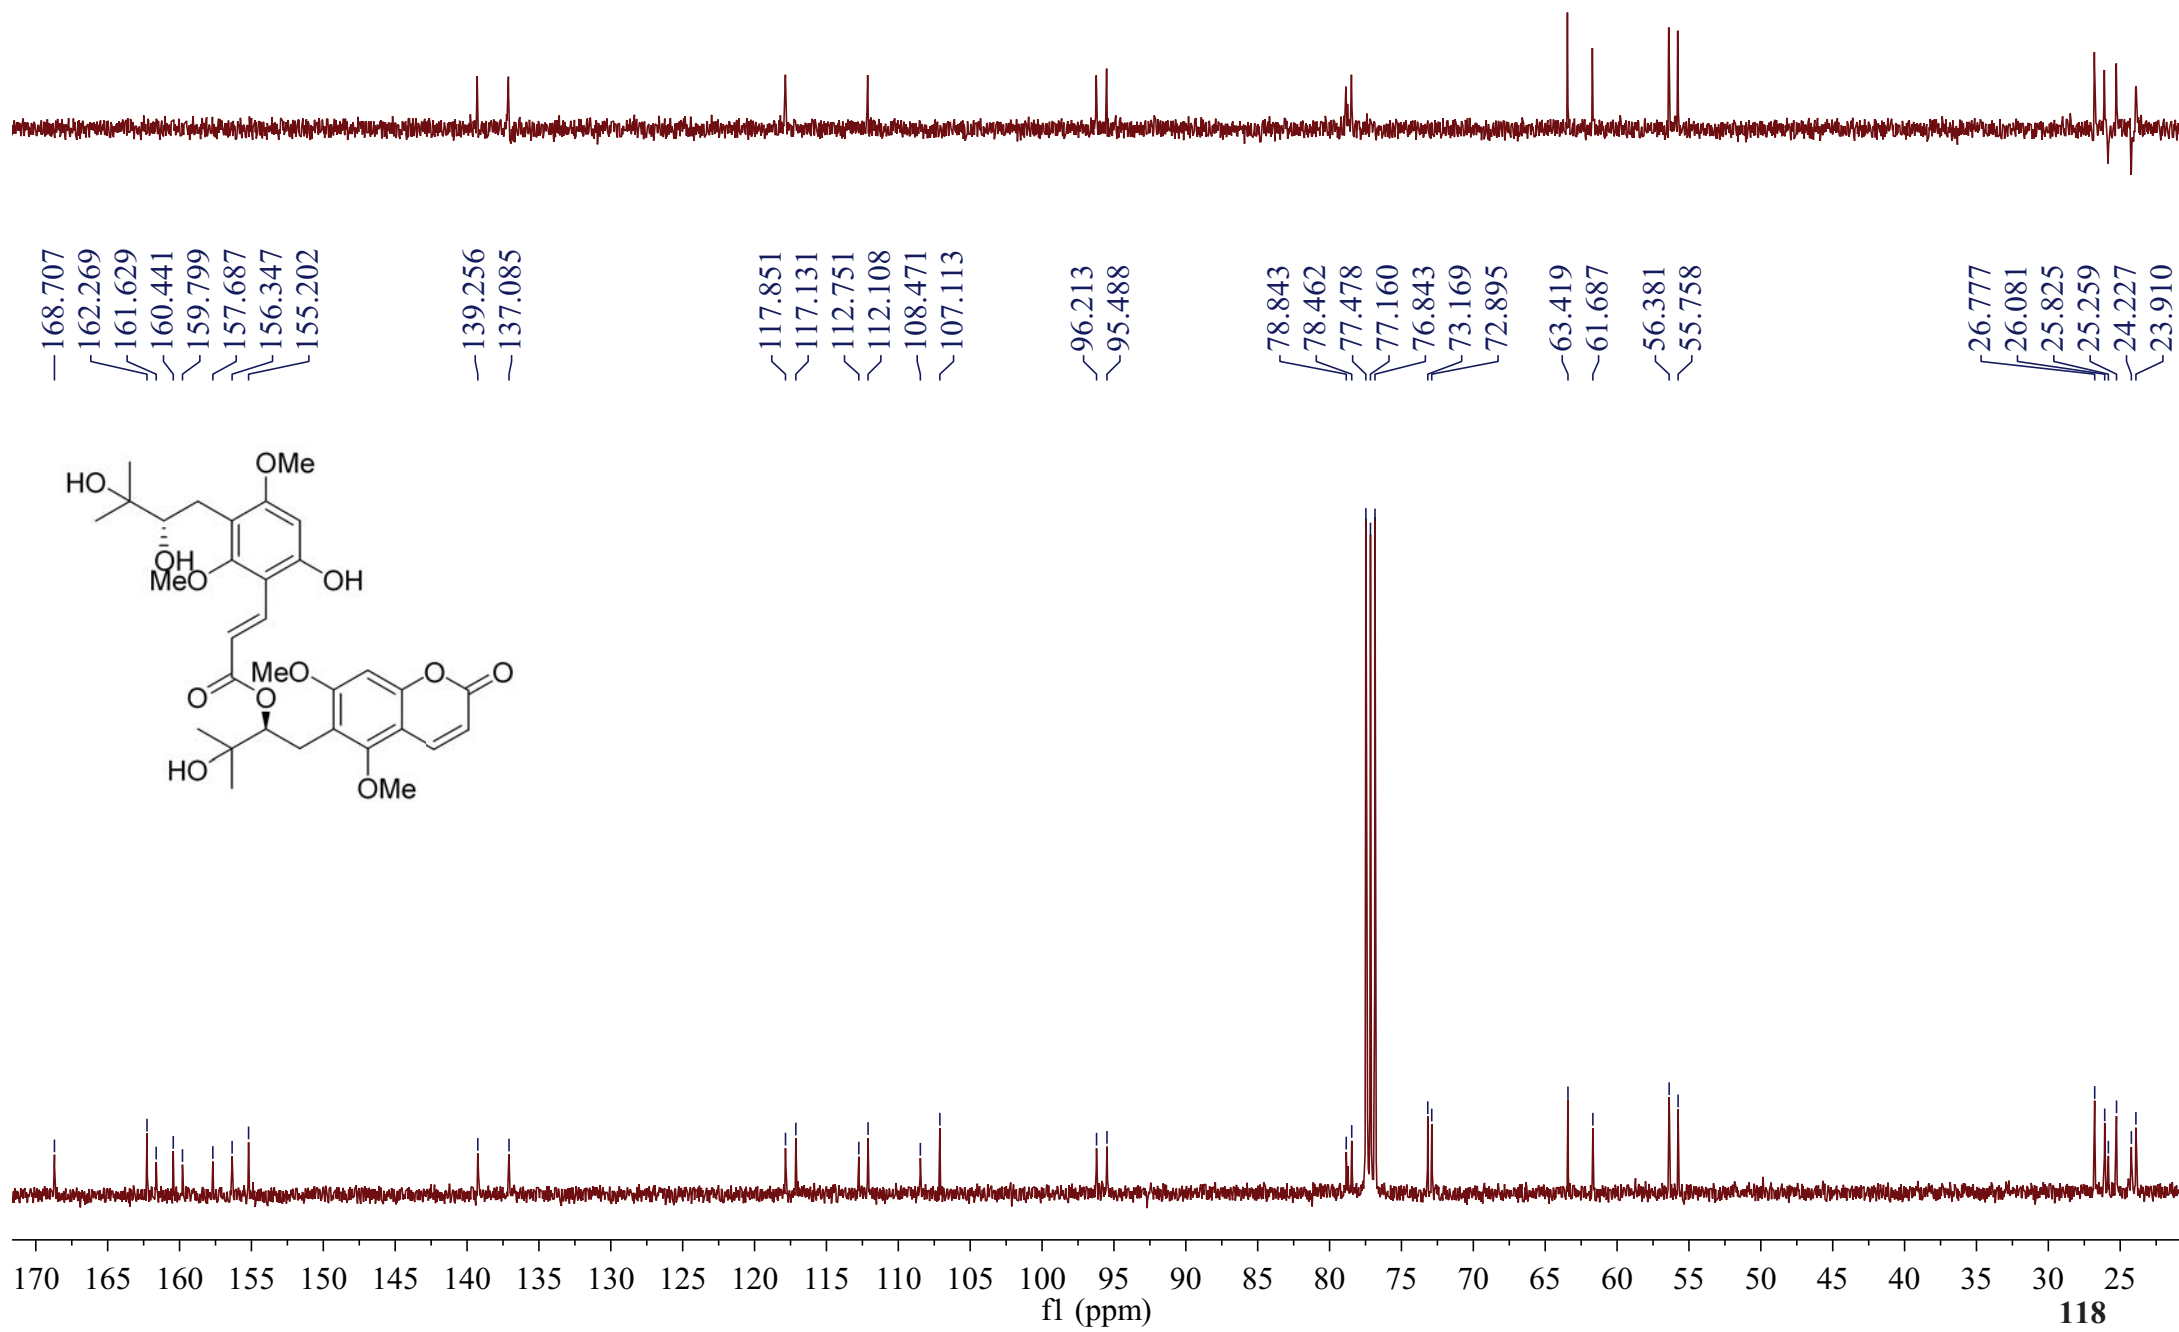

S6.44 <sup>1</sup>H NMR spectrum of compound 27

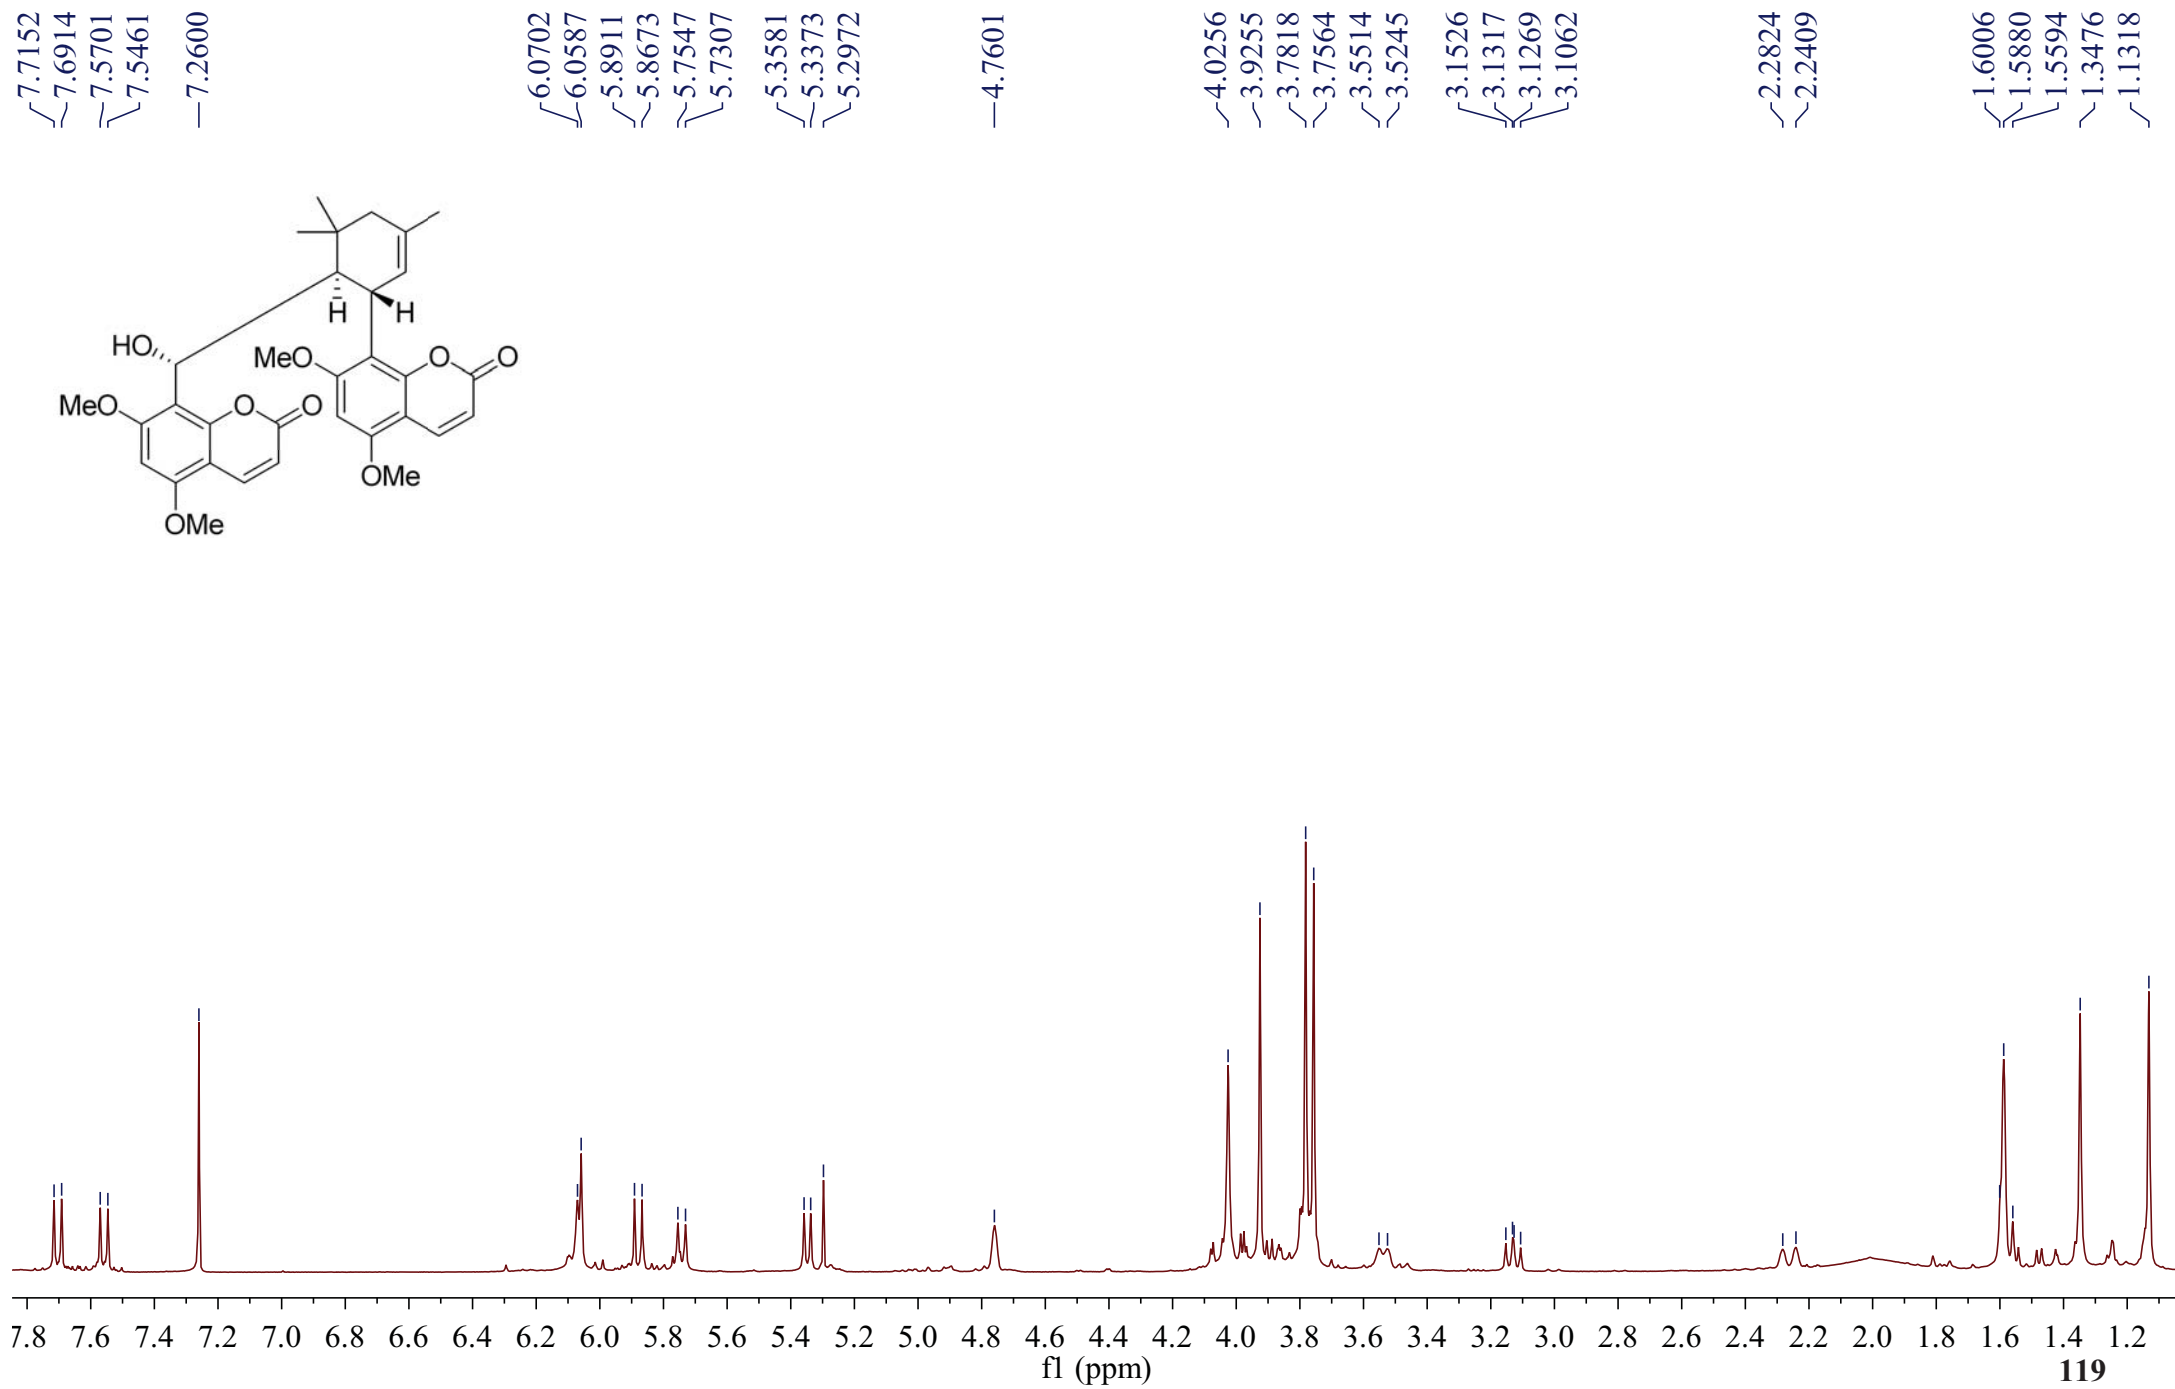

S6.45.  $^{13}\text{C}$  NMR and DEPT spectra of compound **27**

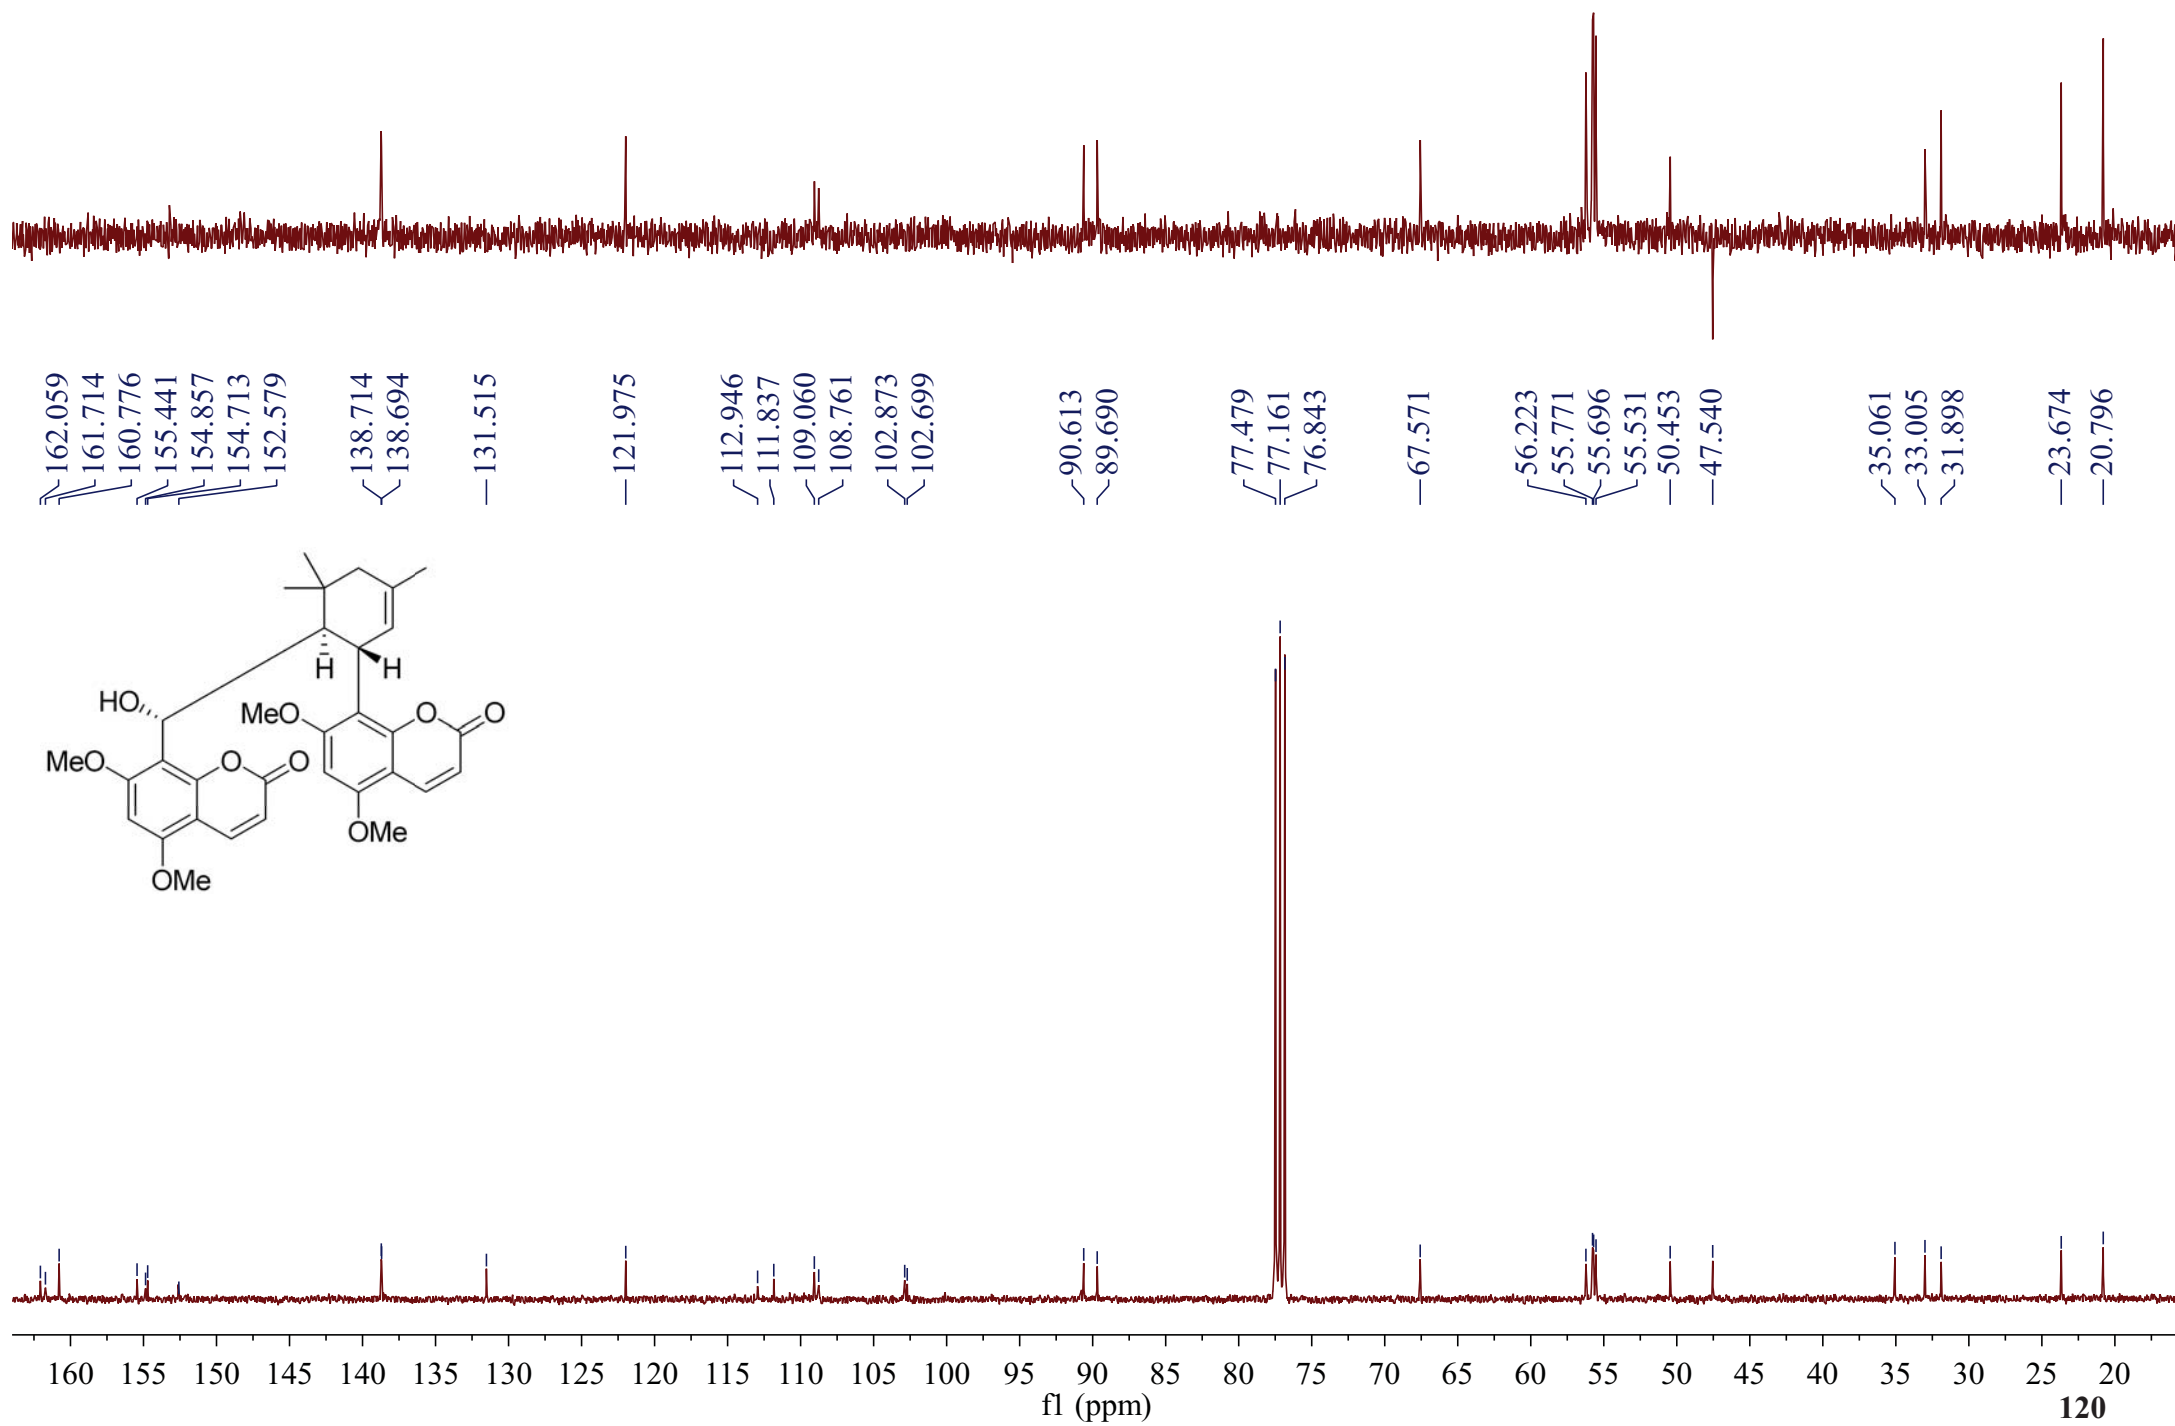



S6.46. <sup>1</sup>H NMR spectrum of compound 28

7.6262  
7.5865

7.1851  
7.0944  
7.0741

6.8428  
6.8226

6.3515  
6.3117

5.3431  
5.3340  
5.3237  
5.3138  
5.3050  
5.2926

4.1768  
4.1690  
4.1606  
3.9038  
3.7732  
3.7660  
3.7543  
3.7460  
3.7157  
3.3694  
3.3286

2.2441  
2.2384  
2.2243  
2.2110  
2.1724  
2.1519  
2.1400  
2.1178  
2.0693  
2.0534  
2.0355  
2.0196

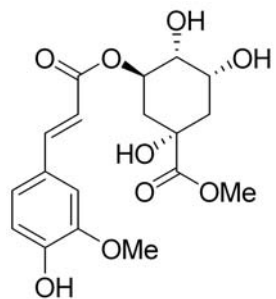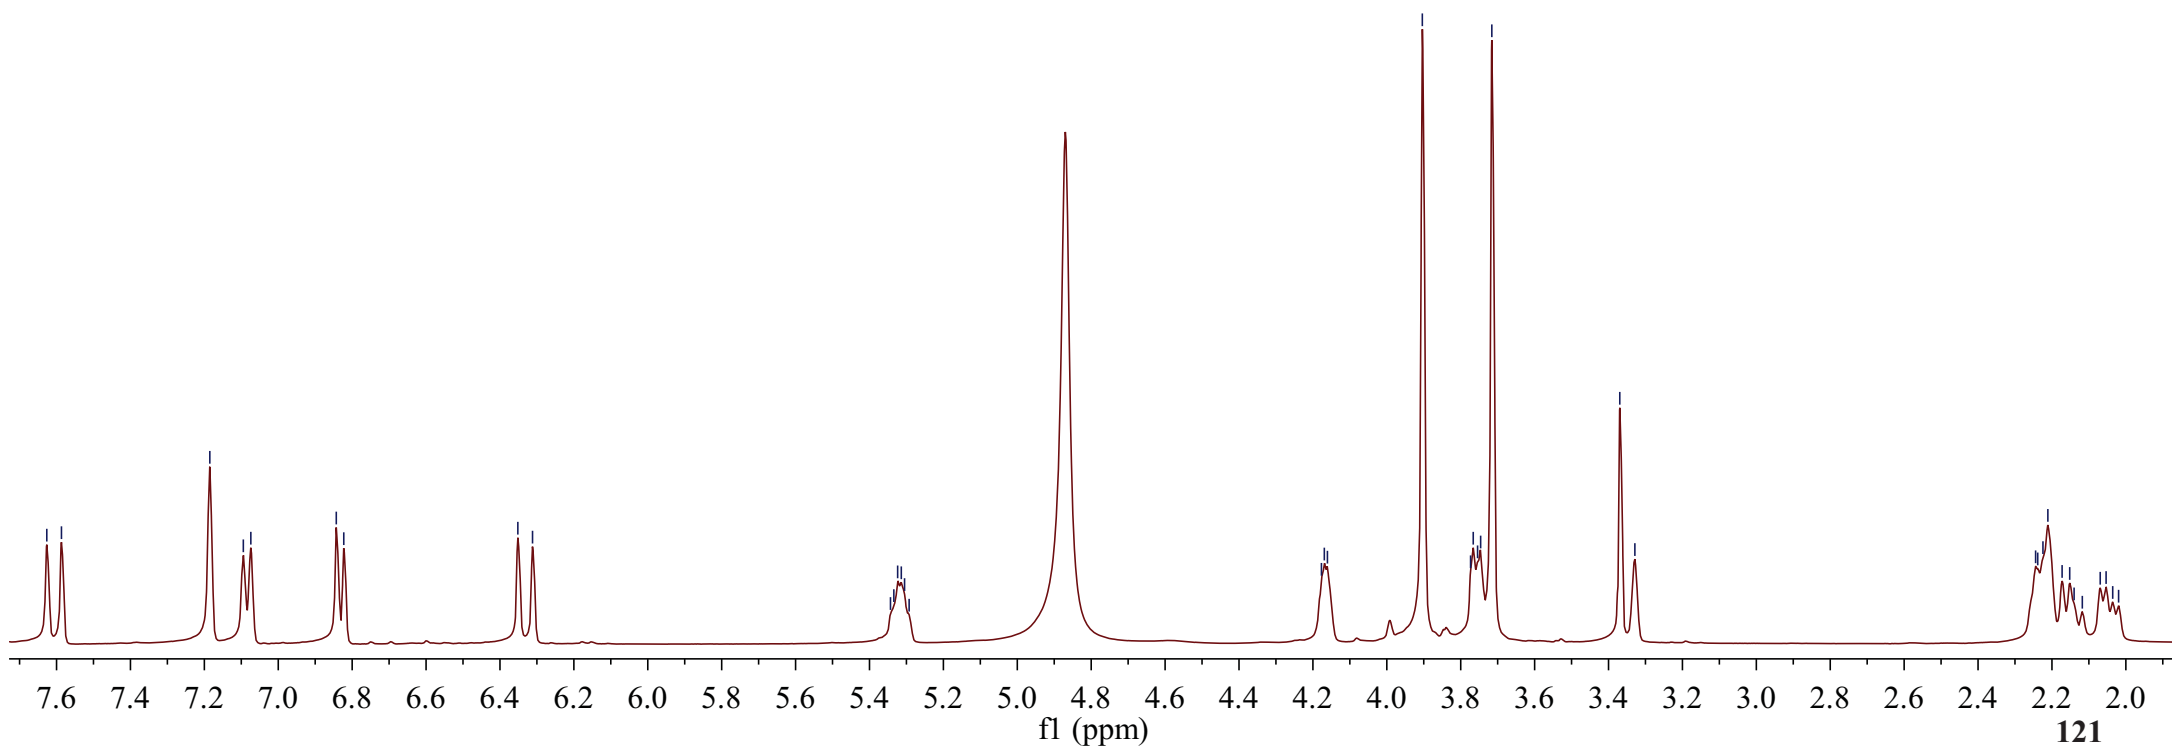

S6.47.  $^{13}\text{C}$  NMR and DEPT spectra of compound **28**

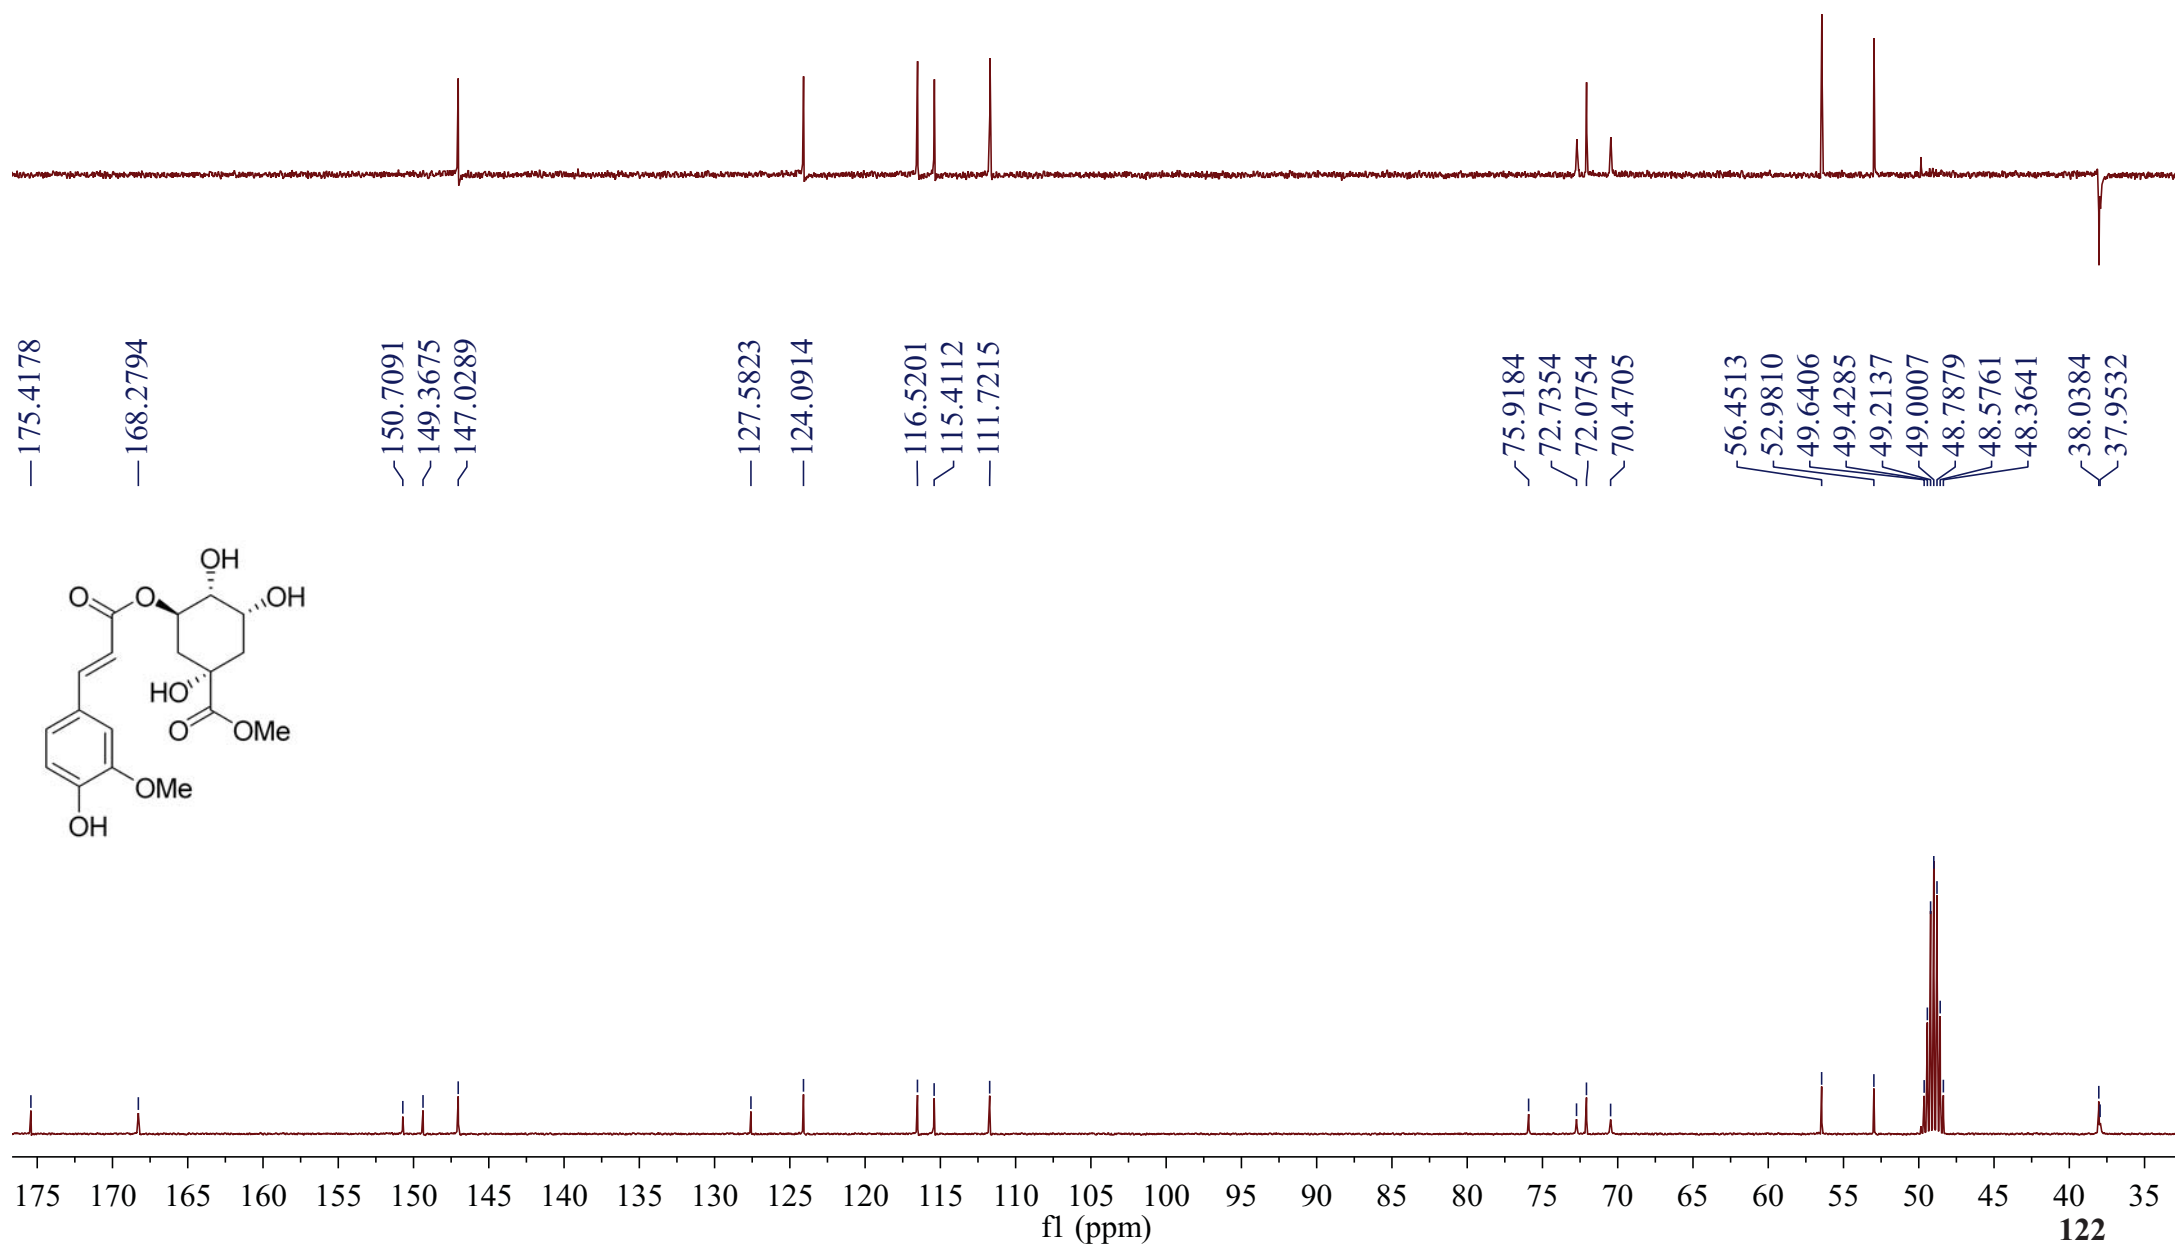

S6.48. <sup>1</sup>H NMR spectrum of compound 29

7.6469  
7.6072  
7.2598  
7.0538  
7.0337  
7.0061  
6.9069  
6.8866

6.3195  
6.2797

5.4191  
5.4079  
5.3906  
5.3794  
5.3667  
5.3548

4.2128  
4.1976  
4.1810  
3.9021  
3.7035  
3.6964  
3.6790  
3.6719  
2.3341  
2.3239  
2.3033  
2.2928  
2.2301  
2.1931  
2.0953  
2.0586  
1.9533  
1.9221  
1.8917  
1.6794  
1.6628  
1.6454  
1.6285  
1.6128  
1.3986  
1.3811  
1.3627  
1.3447  
1.2482  
0.9530  
0.9352  
0.9172

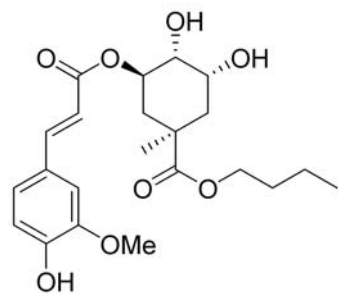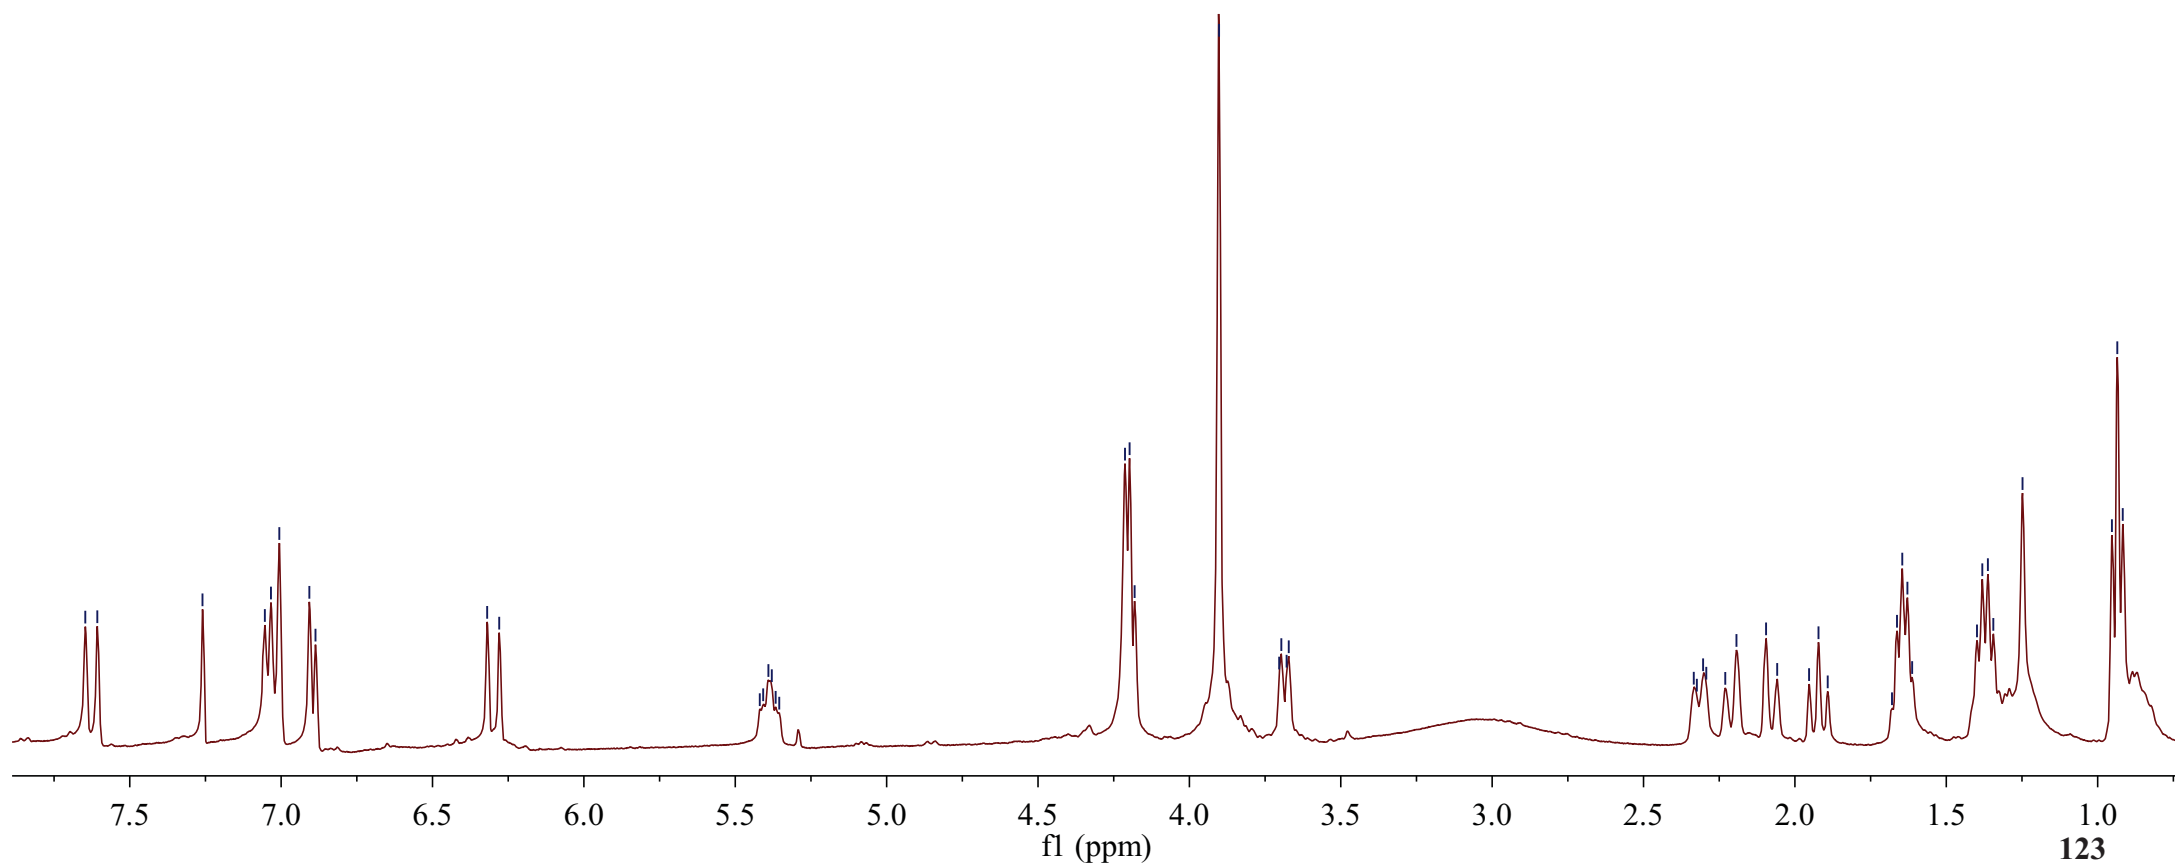

S6.49.  $^{13}\text{C}$  NMR and DEPT spectra of compound 29

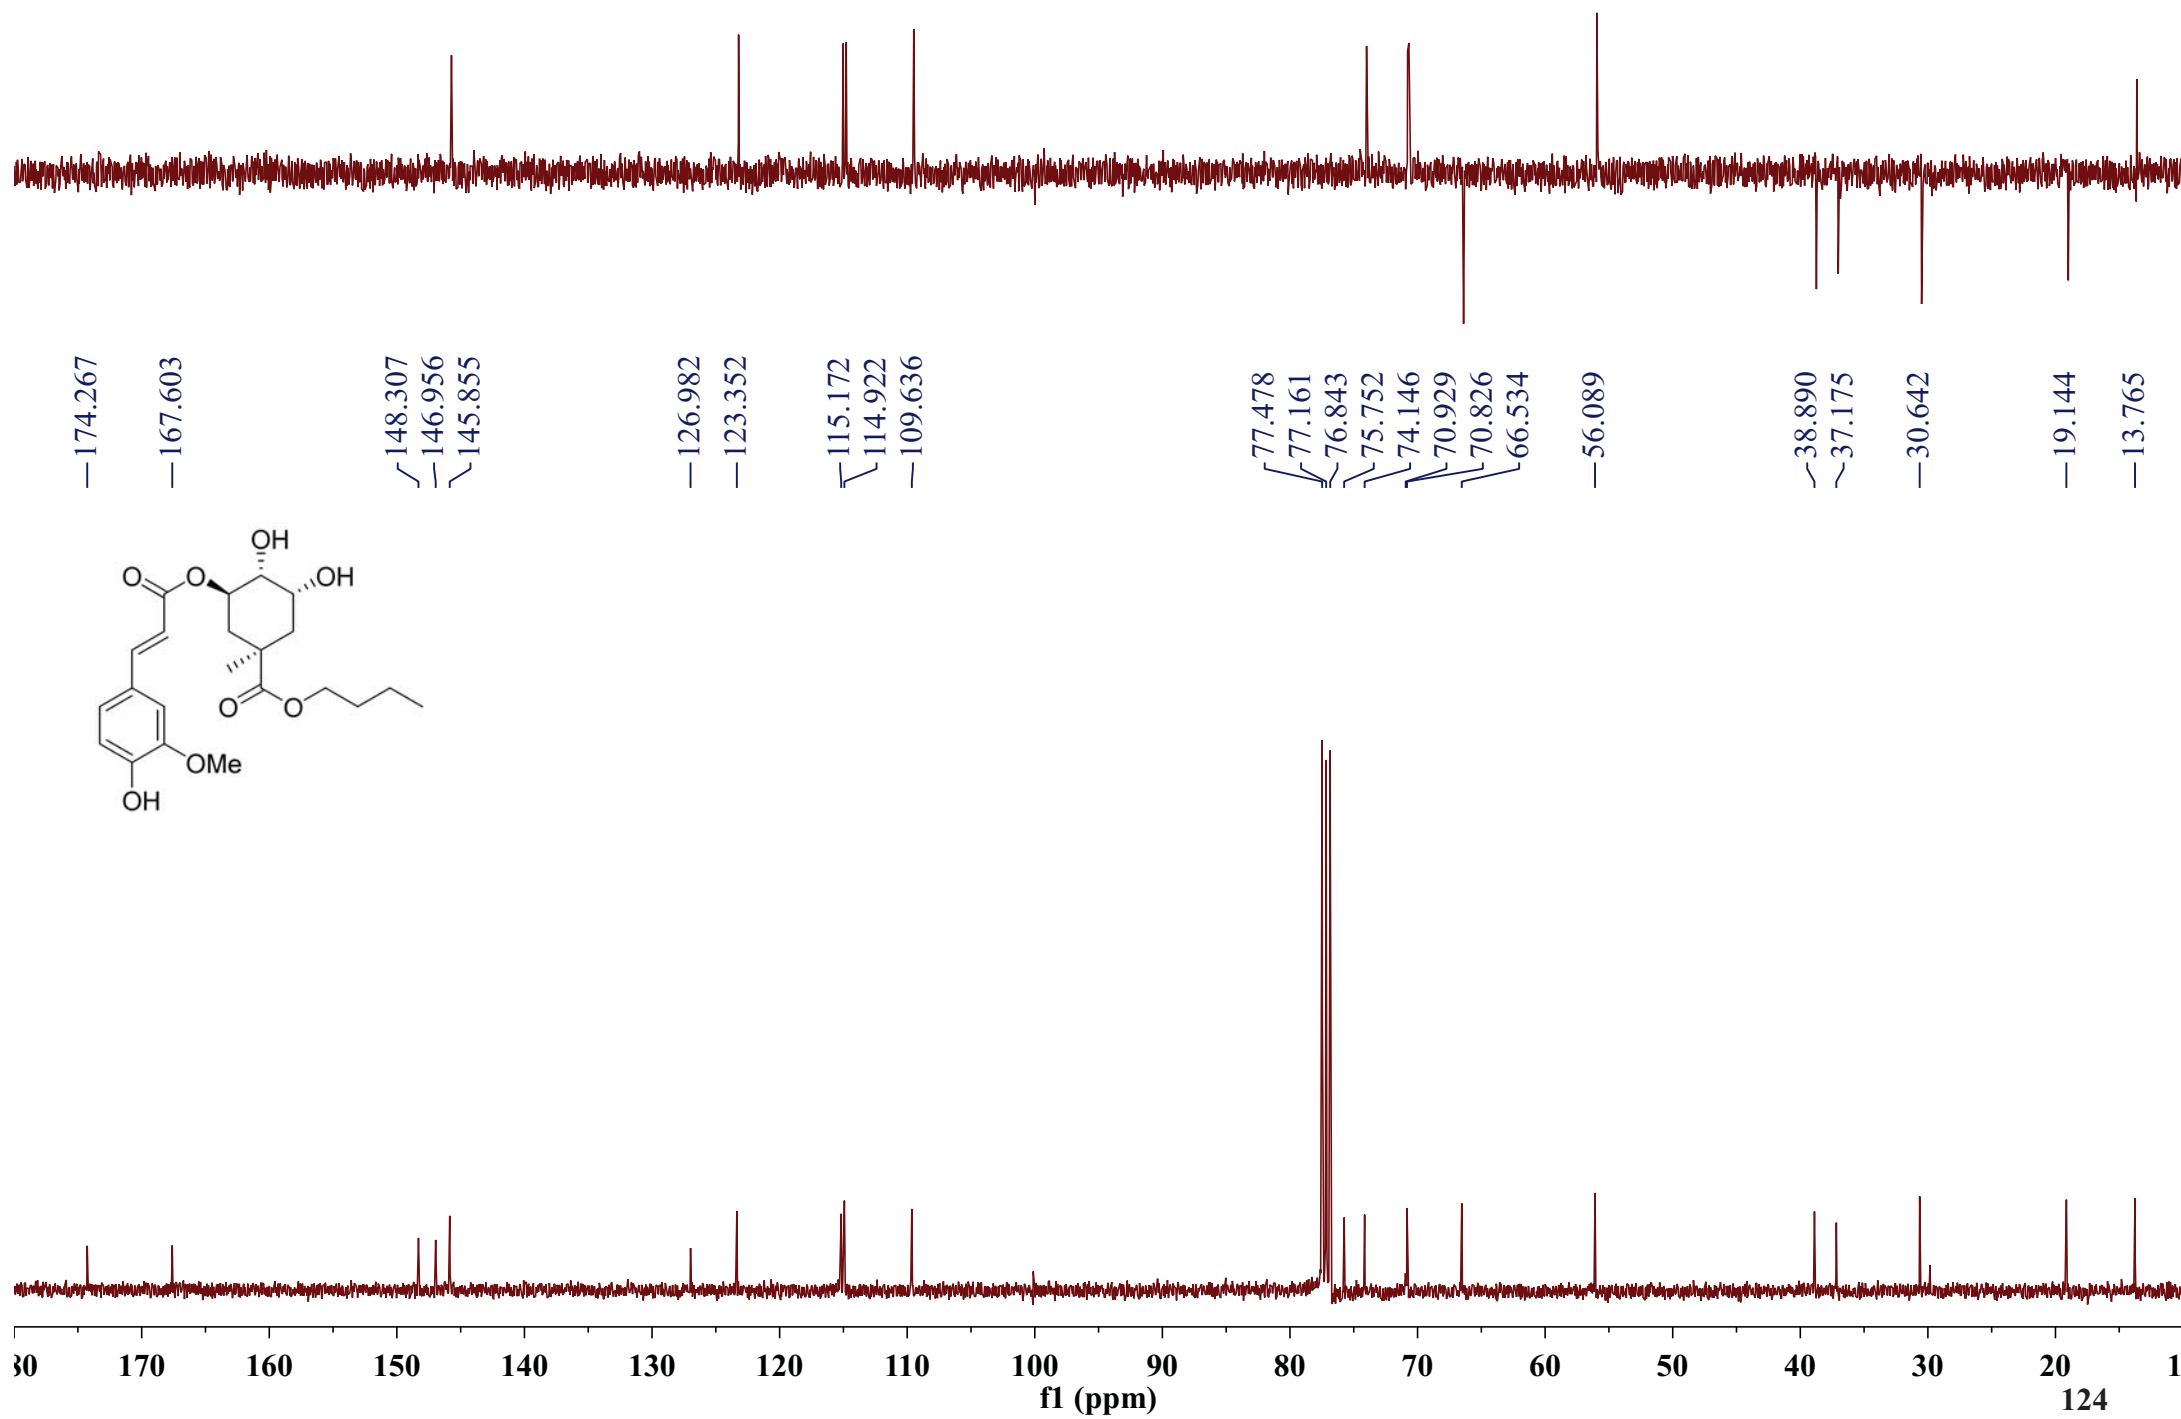

—174.267

—167.603

—148.307

—146.956

—145.855

—126.982

—123.352

—115.172

—114.922

—109.636

77.478

77.161

76.843

75.752

74.146

70.929

70.826

66.534

—56.089

~38.890

~37.175

—30.642

—19.144

—13.765

S6.50. <sup>1</sup>H NMR spectrum of compound 30

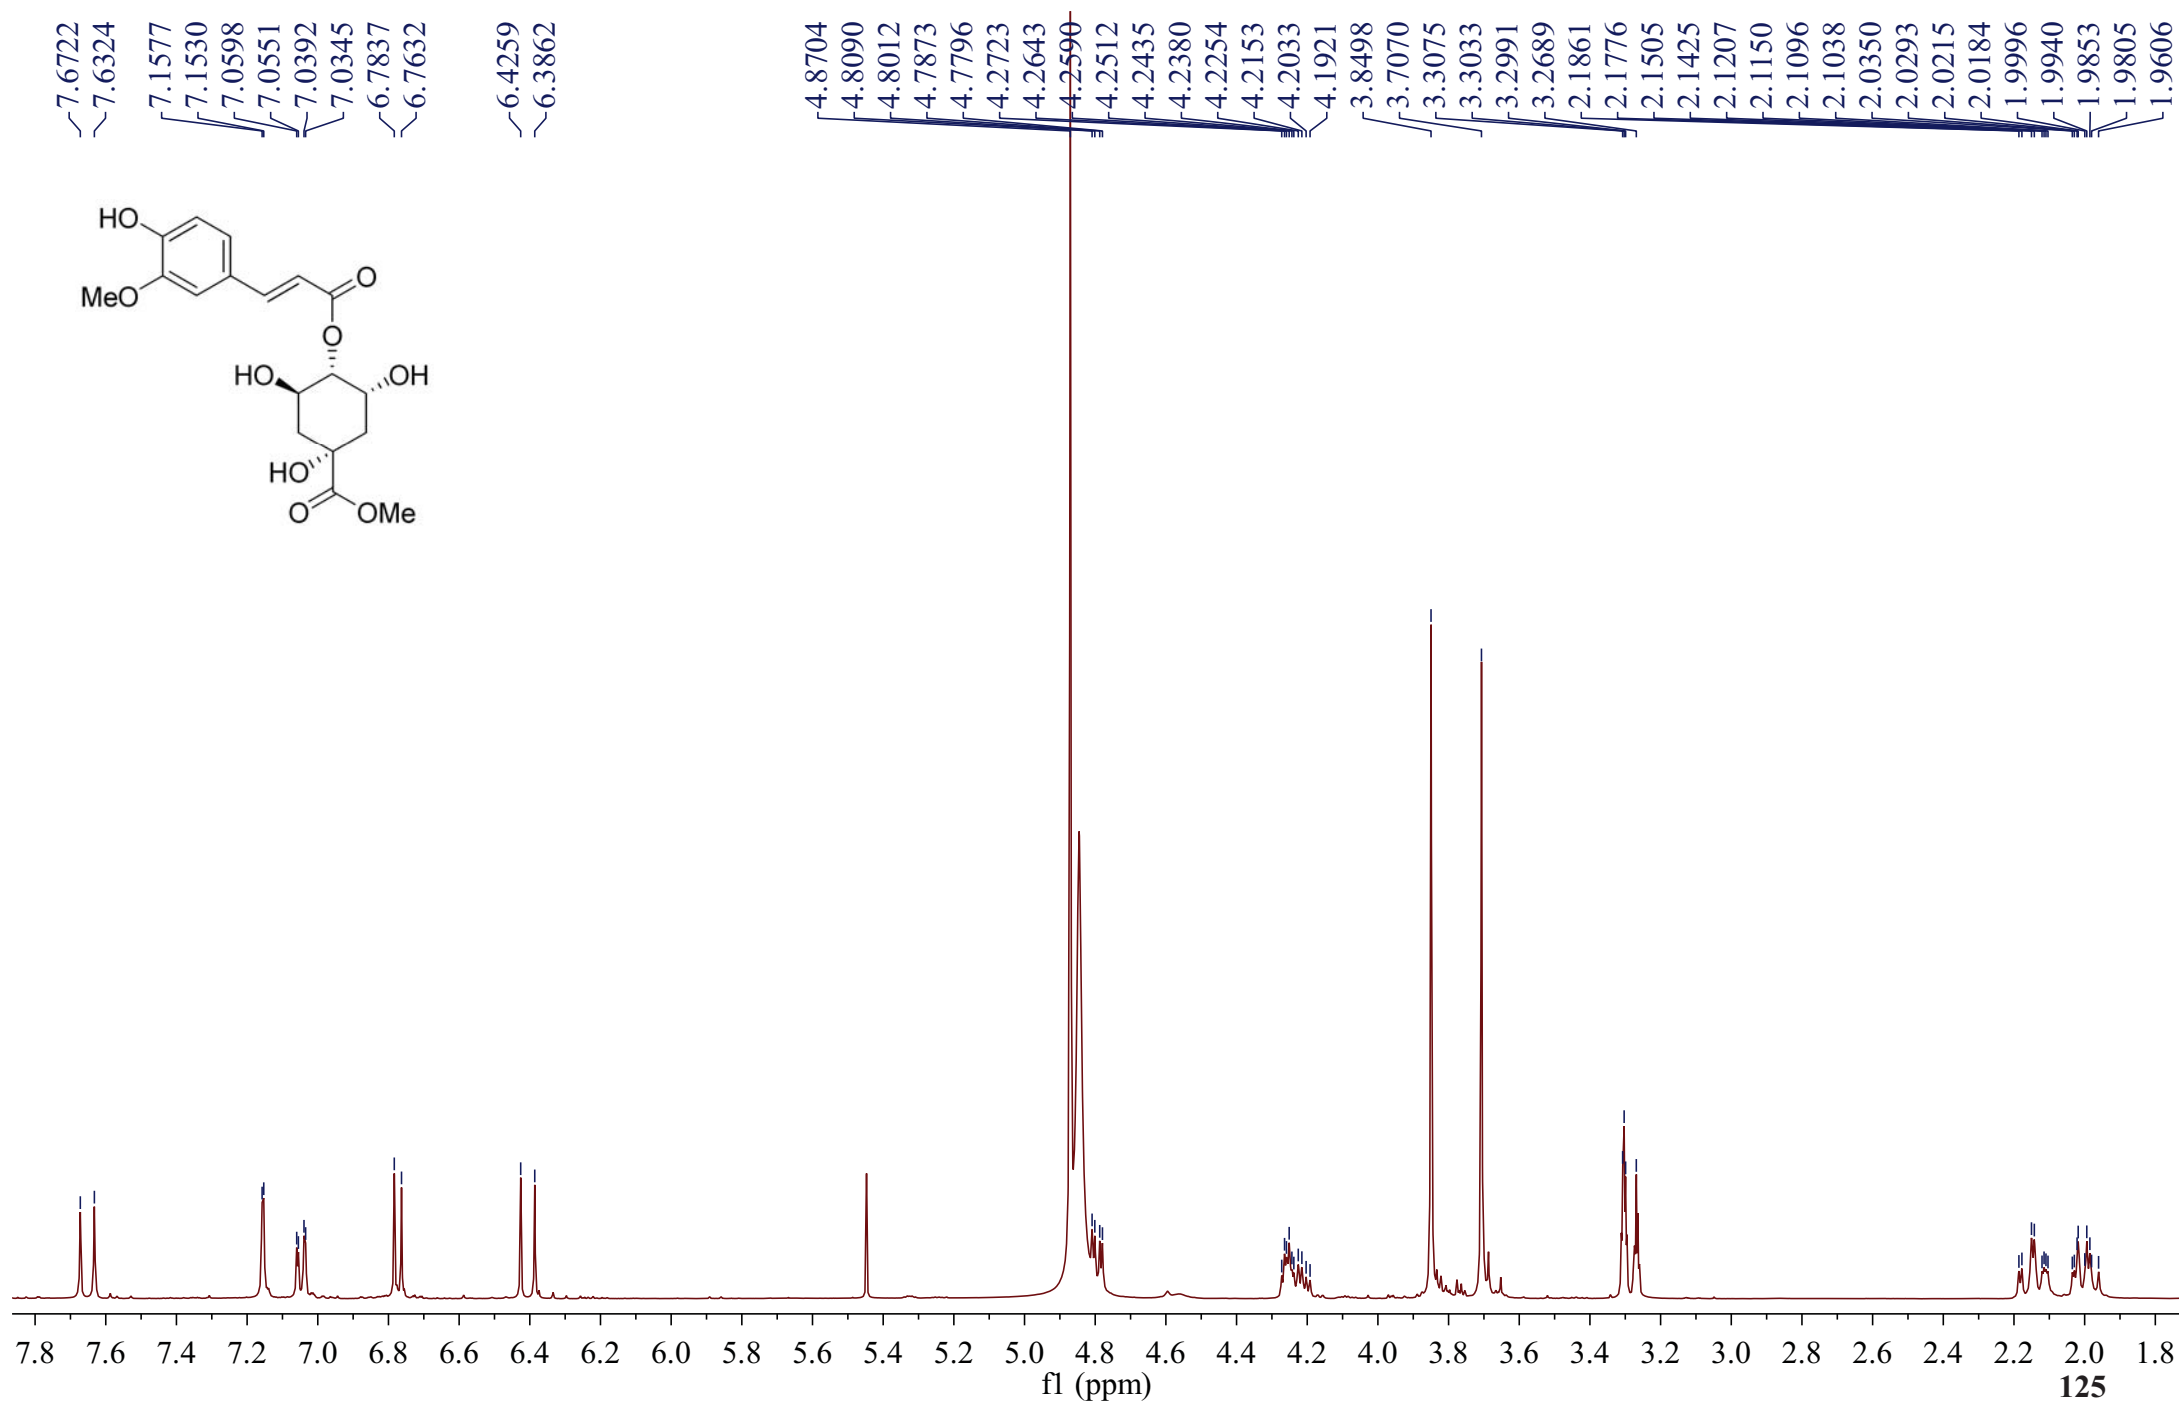

7.6722  
7.6324  
7.1577  
7.1530  
7.0598  
7.0551  
7.0392  
7.0345  
6.7837  
6.7632

6.4259  
6.3862

4.8704  
4.8090  
4.8012  
4.7873  
4.7796  
4.2723  
4.2643  
4.2590  
4.2512  
4.2435  
4.2380  
4.2254  
4.2153  
4.2033  
4.1921  
3.8498  
3.7070  
3.3075  
3.3033  
3.2991  
3.2689  
2.1861  
2.1776  
2.1505  
2.1425  
2.1207  
2.1150  
2.1096  
2.1038  
2.0350  
2.0293  
2.0215  
2.0184  
1.9996  
1.9940  
1.9853  
1.9805  
1.9606

S6.51. <sup>13</sup>C NMR and DEPT spectra of compound 30

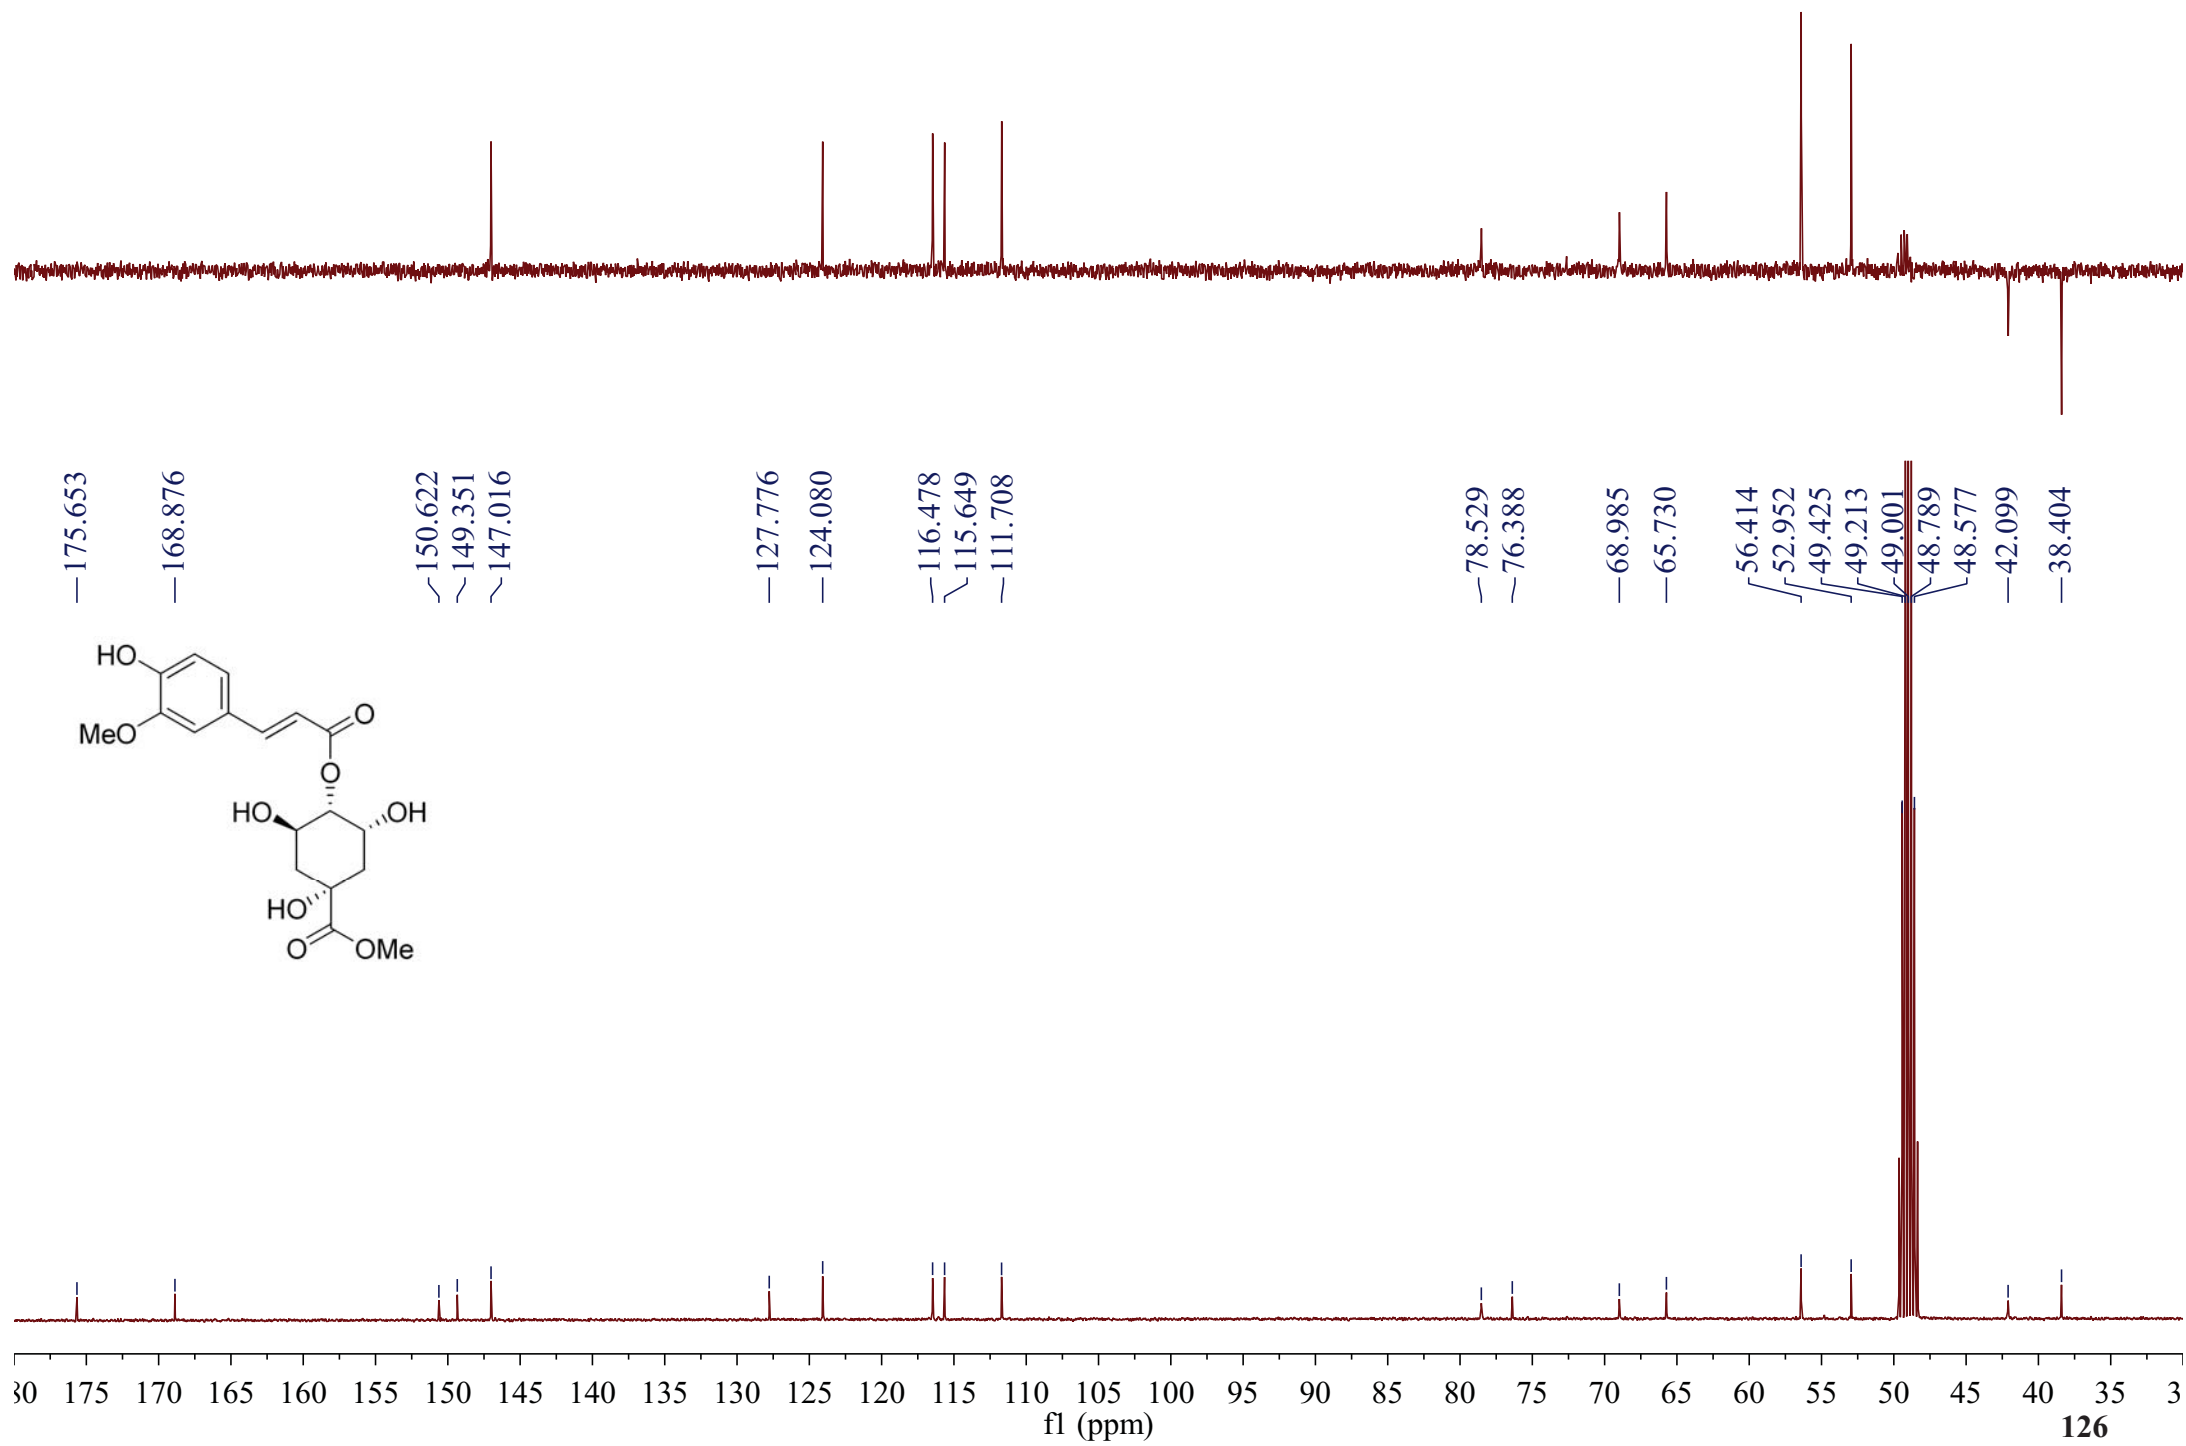

— 175.653

— 168.876

~ 150.622

~ 149.351

~ 147.016

— 127.776

— 124.080

~ 116.478

~ 115.649

~ 111.708

~ 78.529

~ 76.388

— 68.985

— 65.730

~ 56.414

~ 52.952

~ 49.425

~ 49.213

~ 49.001

~ 48.789

~ 48.577

— 42.099

— 38.404

S6.52. <sup>1</sup>H NMR spectrum of compound 31

9.5862  
9.5664

7.6178  
7.5793  
7.5655  
7.5441

6.8732  
6.8527  
6.6555  
6.6359  
6.6161  
6.5960

4.8703

3.3357  
3.3317  
3.3278  
3.3233

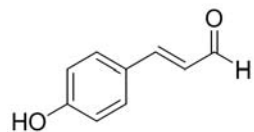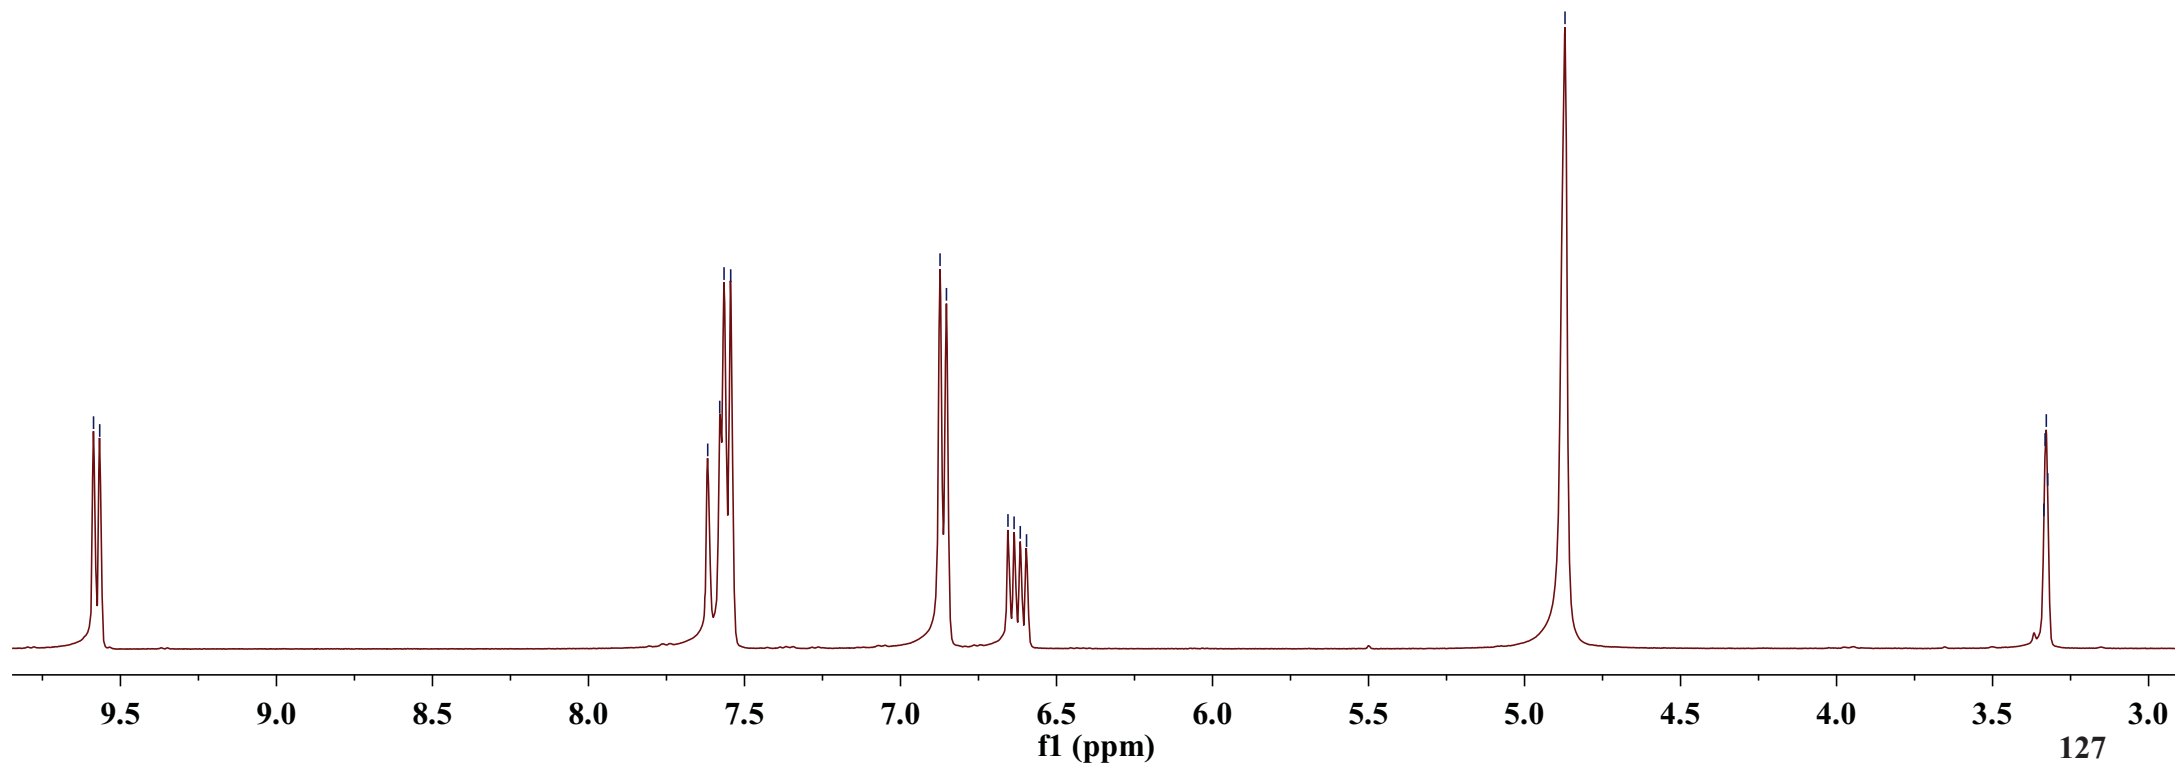

S6.53.  $^{13}\text{C}$  NMR and DEPT spectra of compound 31

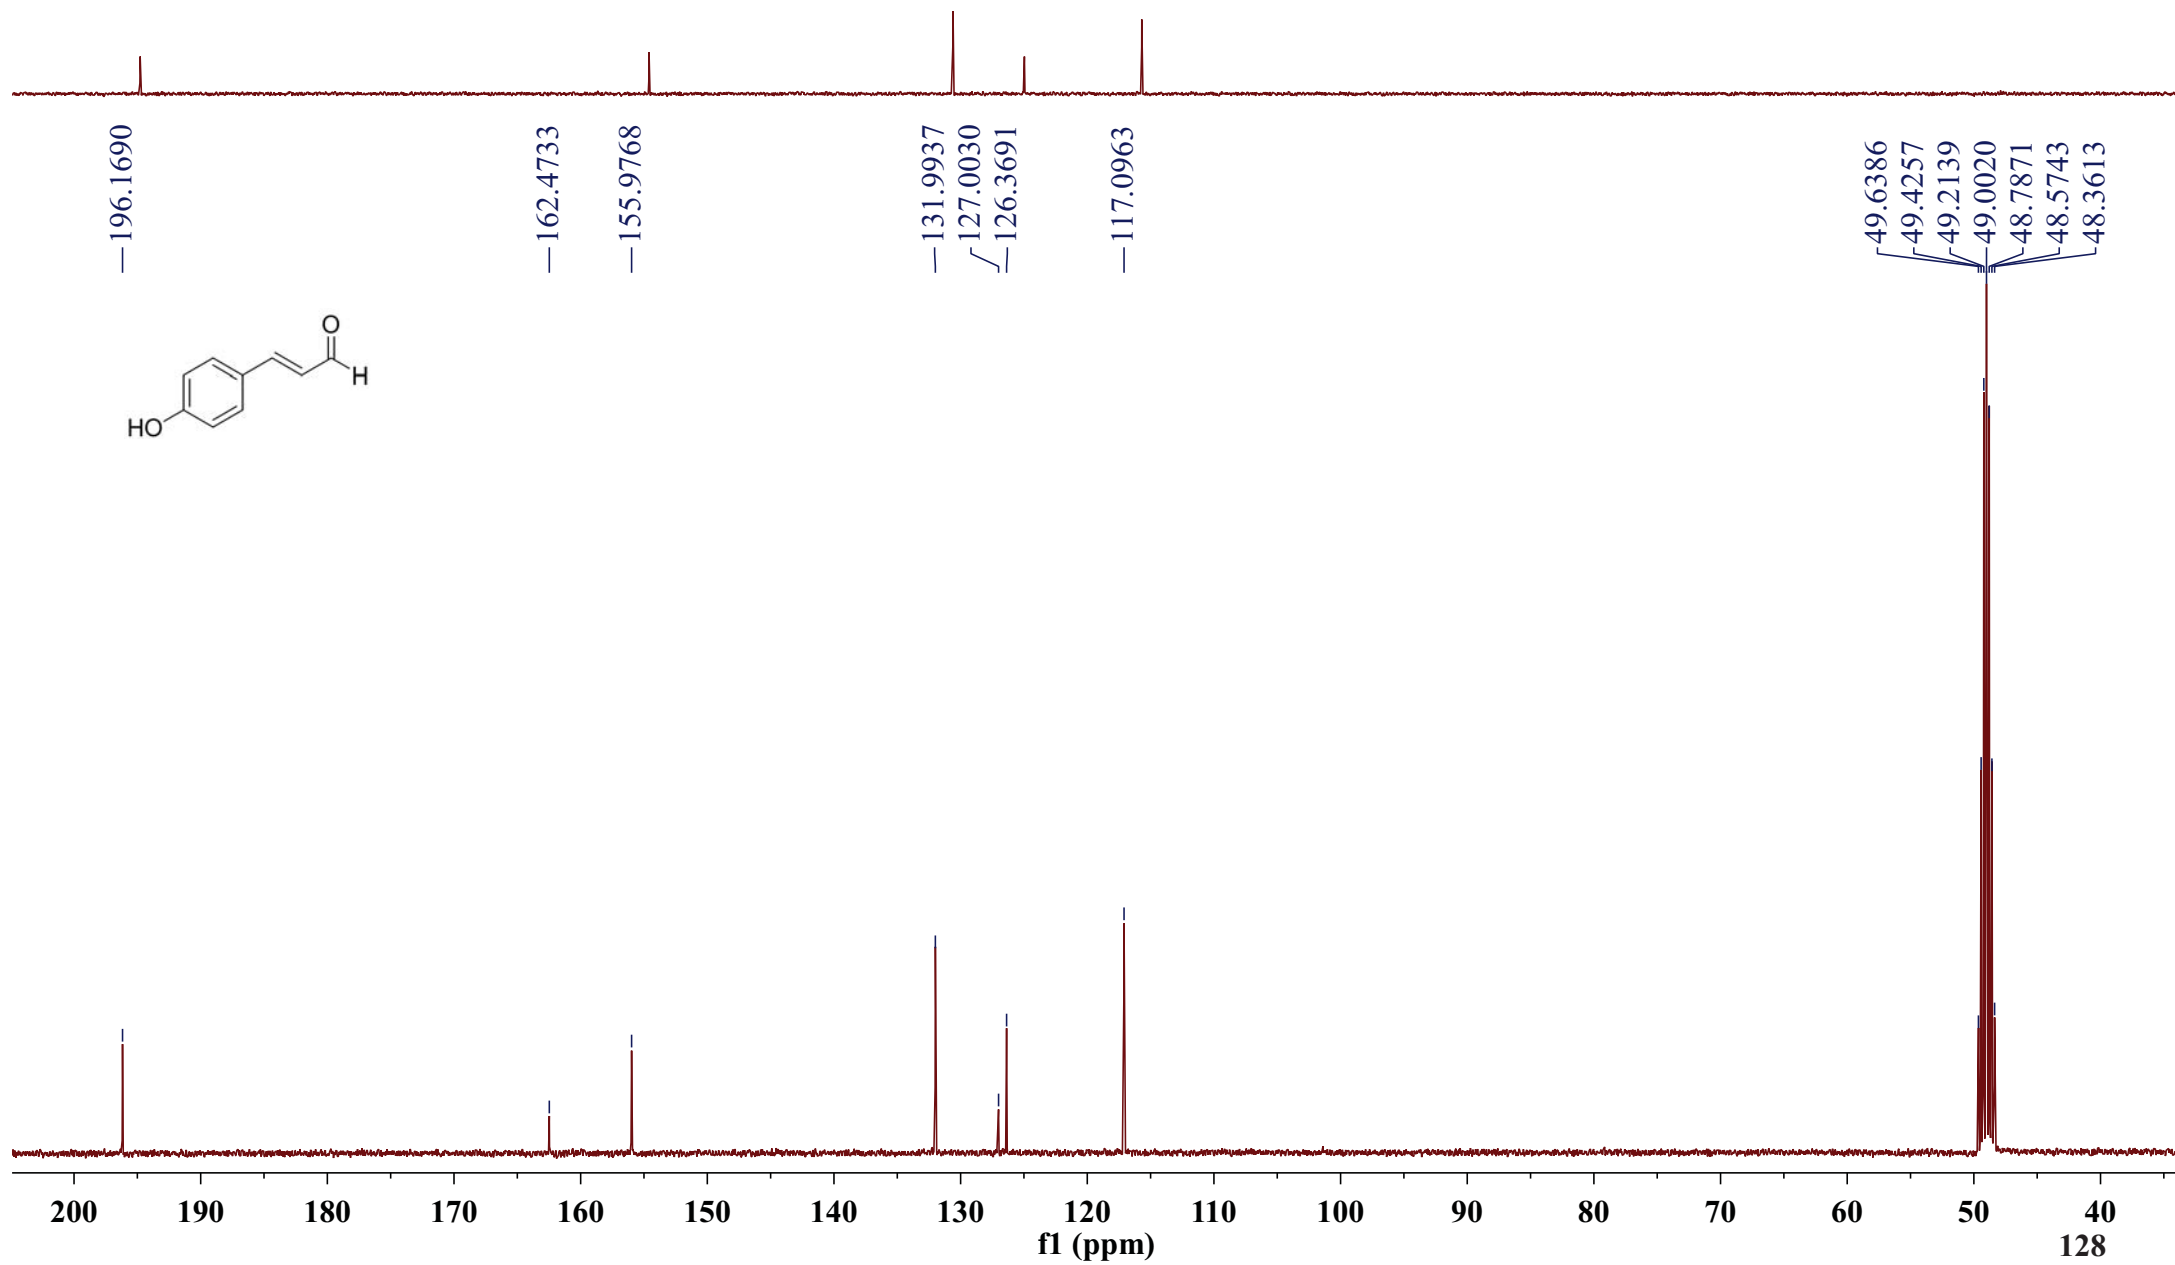



S6.54. <sup>1</sup>H NMR spectrum of compound 32

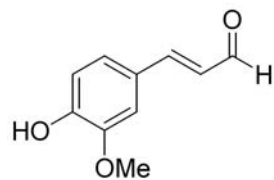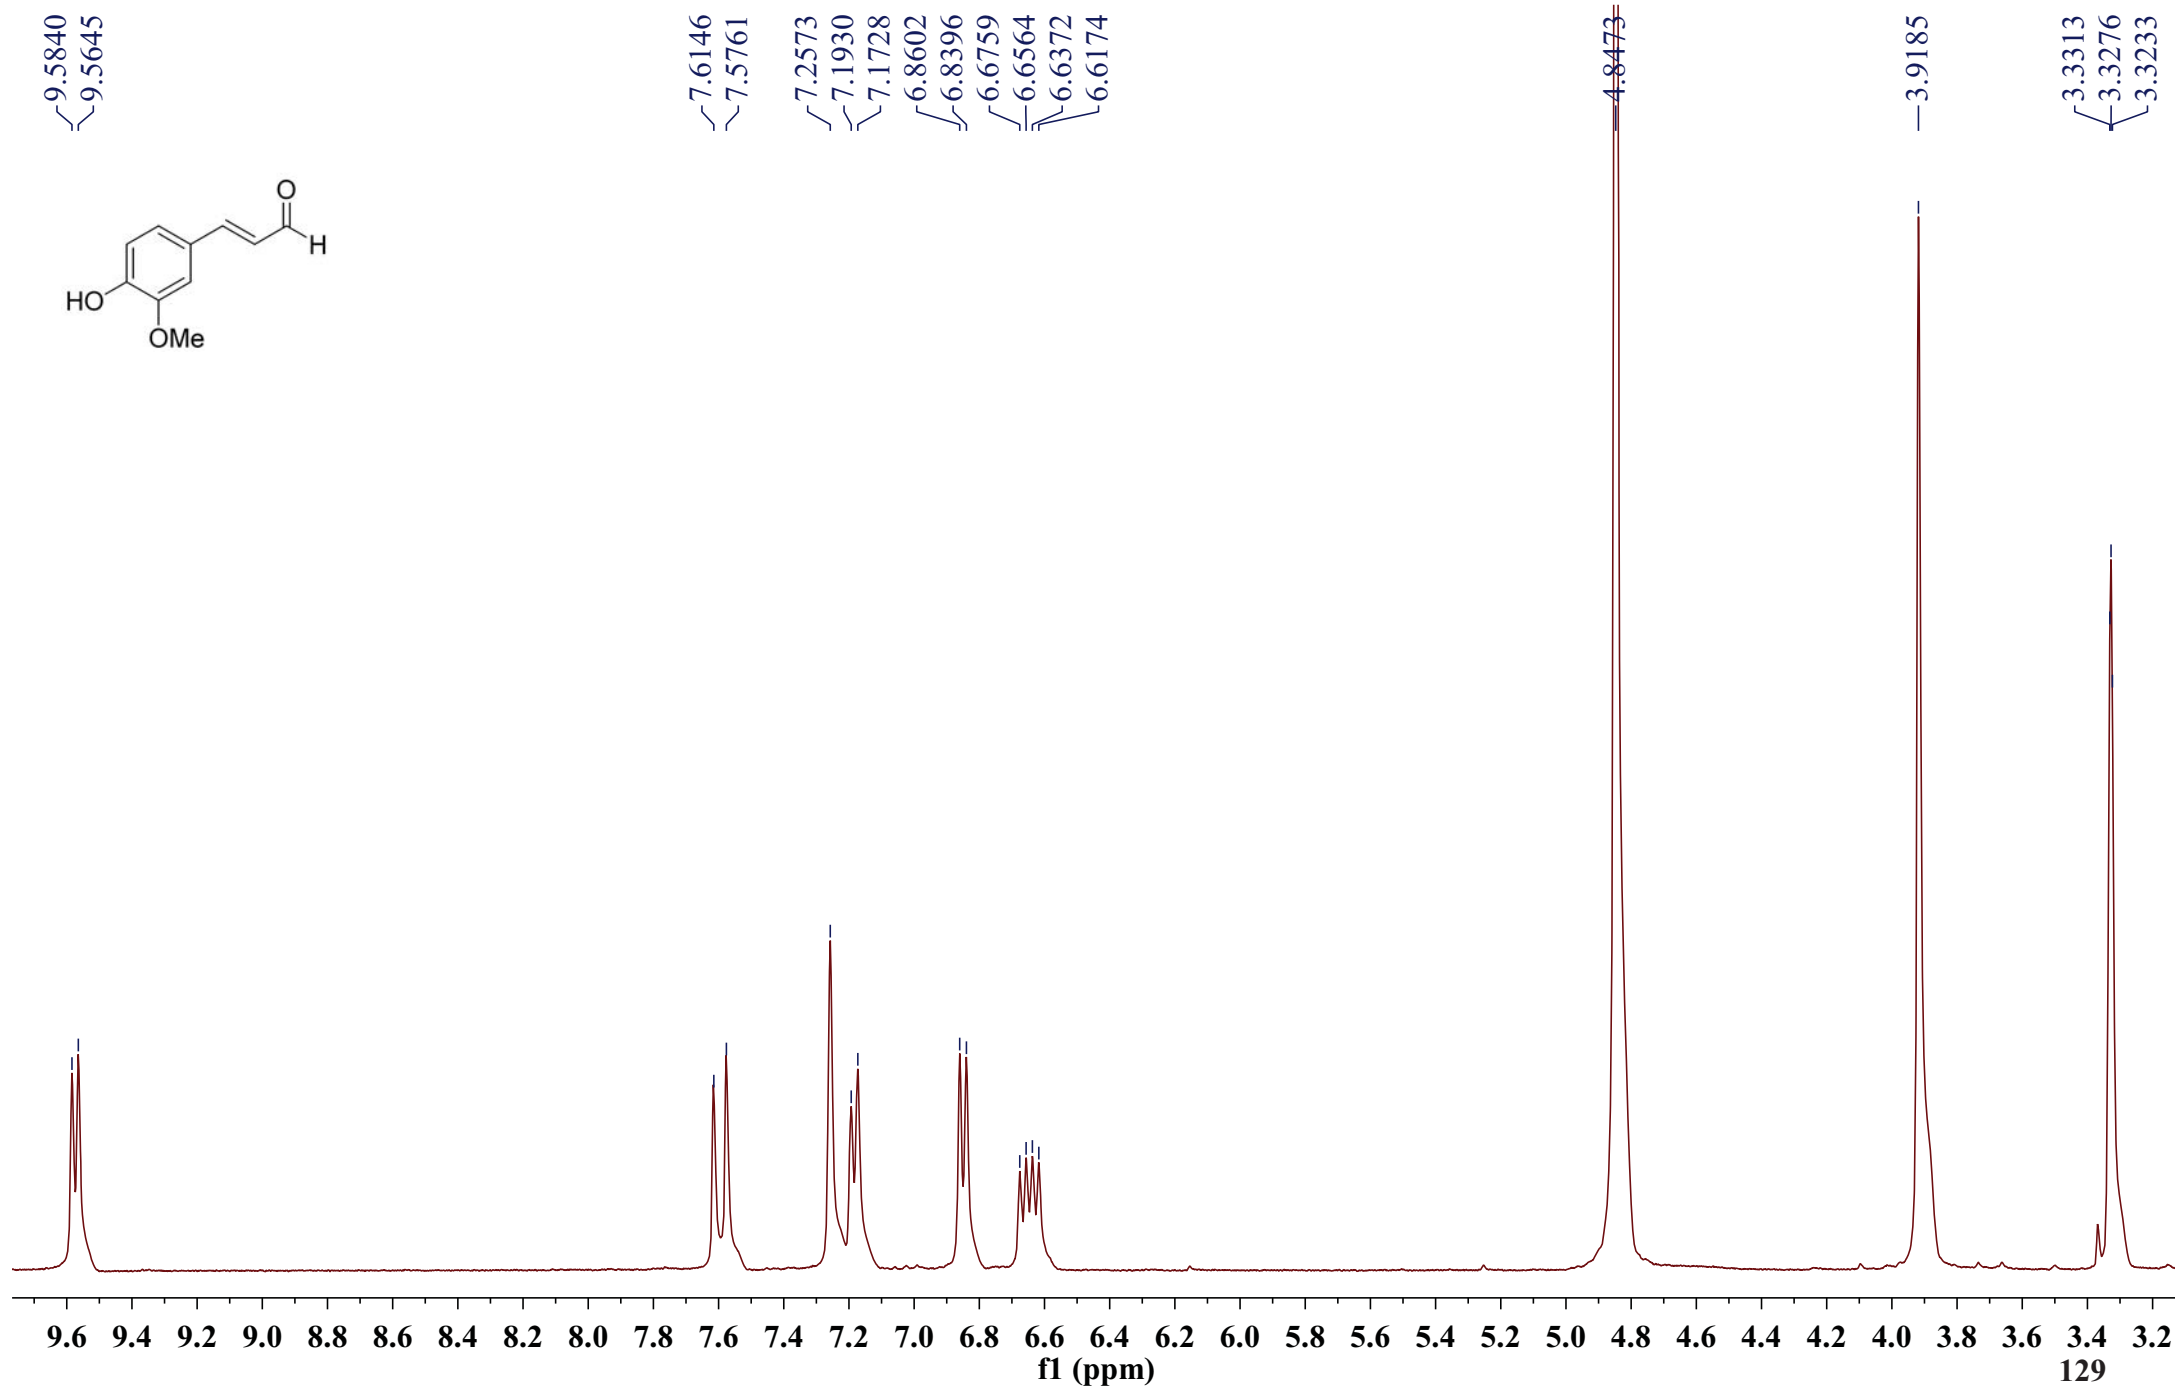



S6.56.  $^{13}\text{C}$  NMR and DEPT spectra of compound 33

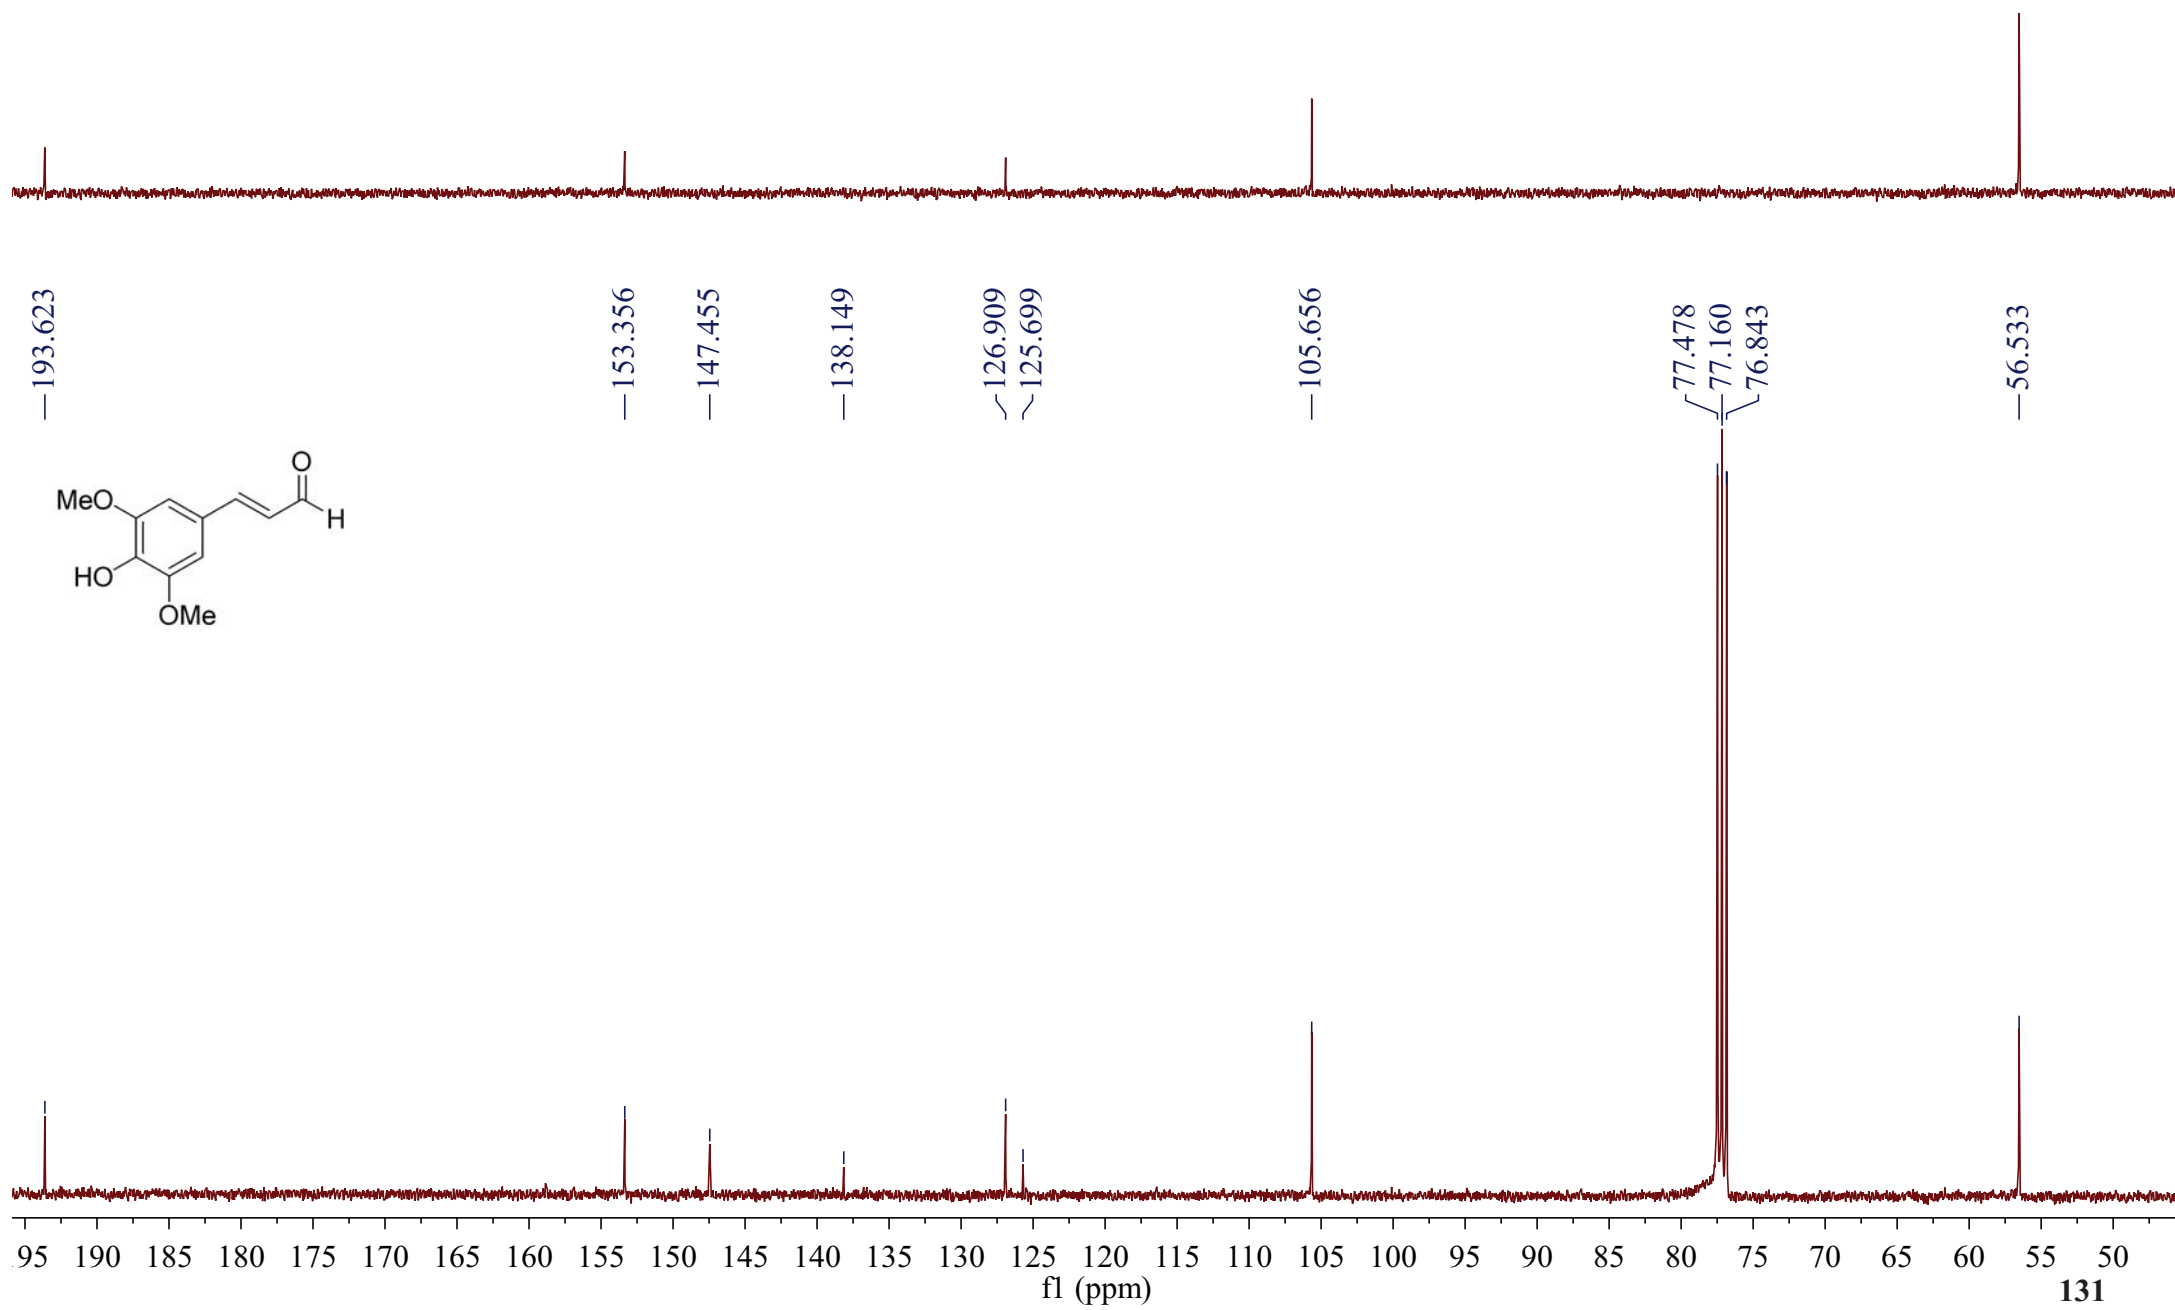

S6.57. <sup>1</sup>H NMR spectrum of compound 34

7.7125  
7.6912  
7.5670  
7.5142  
7.4929  
7.3116  
7.1046  
6.8591

6.0318  
6.0254

5.2740

4.5779  
4.5632  
4.5560  
4.5416

3.9791  
3.9325

2.7316  
2.7119  
2.6946  
2.6724  
2.3500  
2.3355  
2.3107  
2.2961  
1.9688

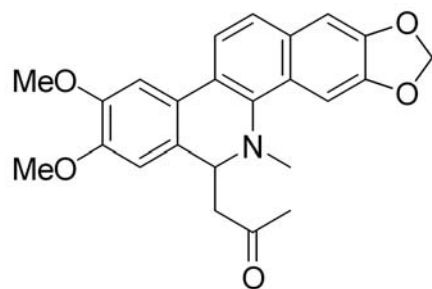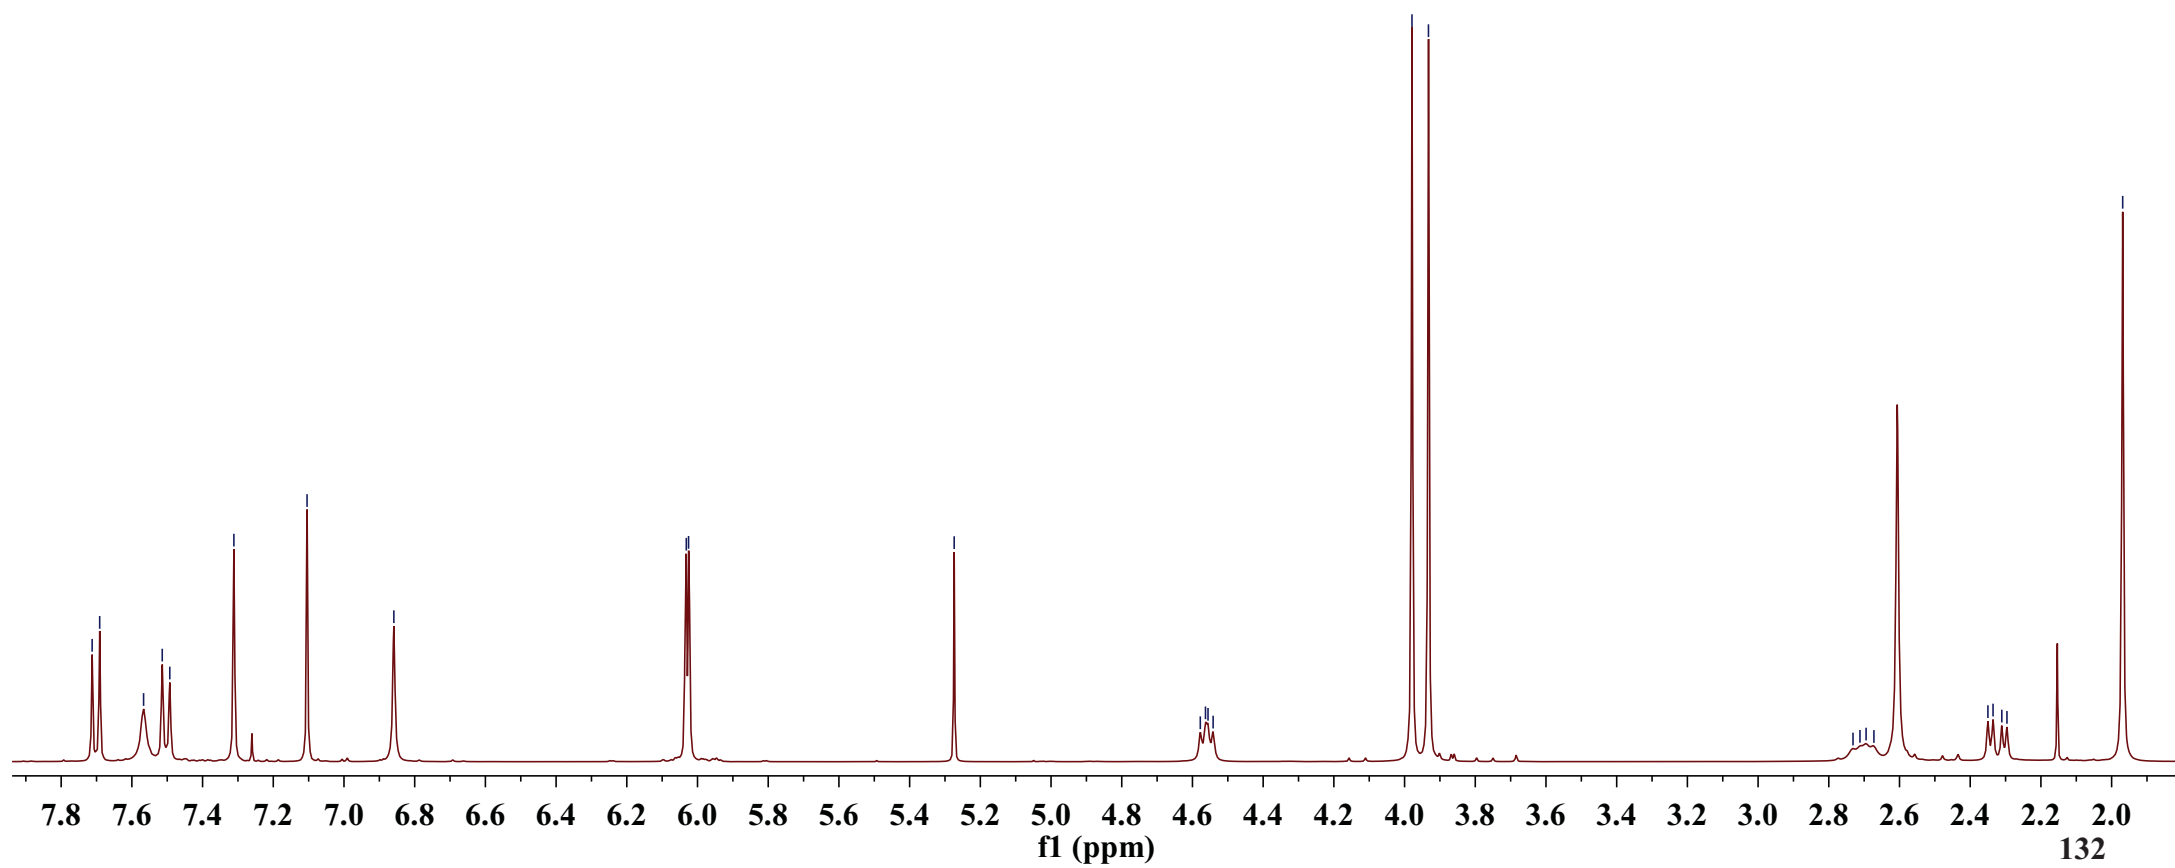

S6.58.  $^{13}\text{C}$  NMR spectrum of compound 34

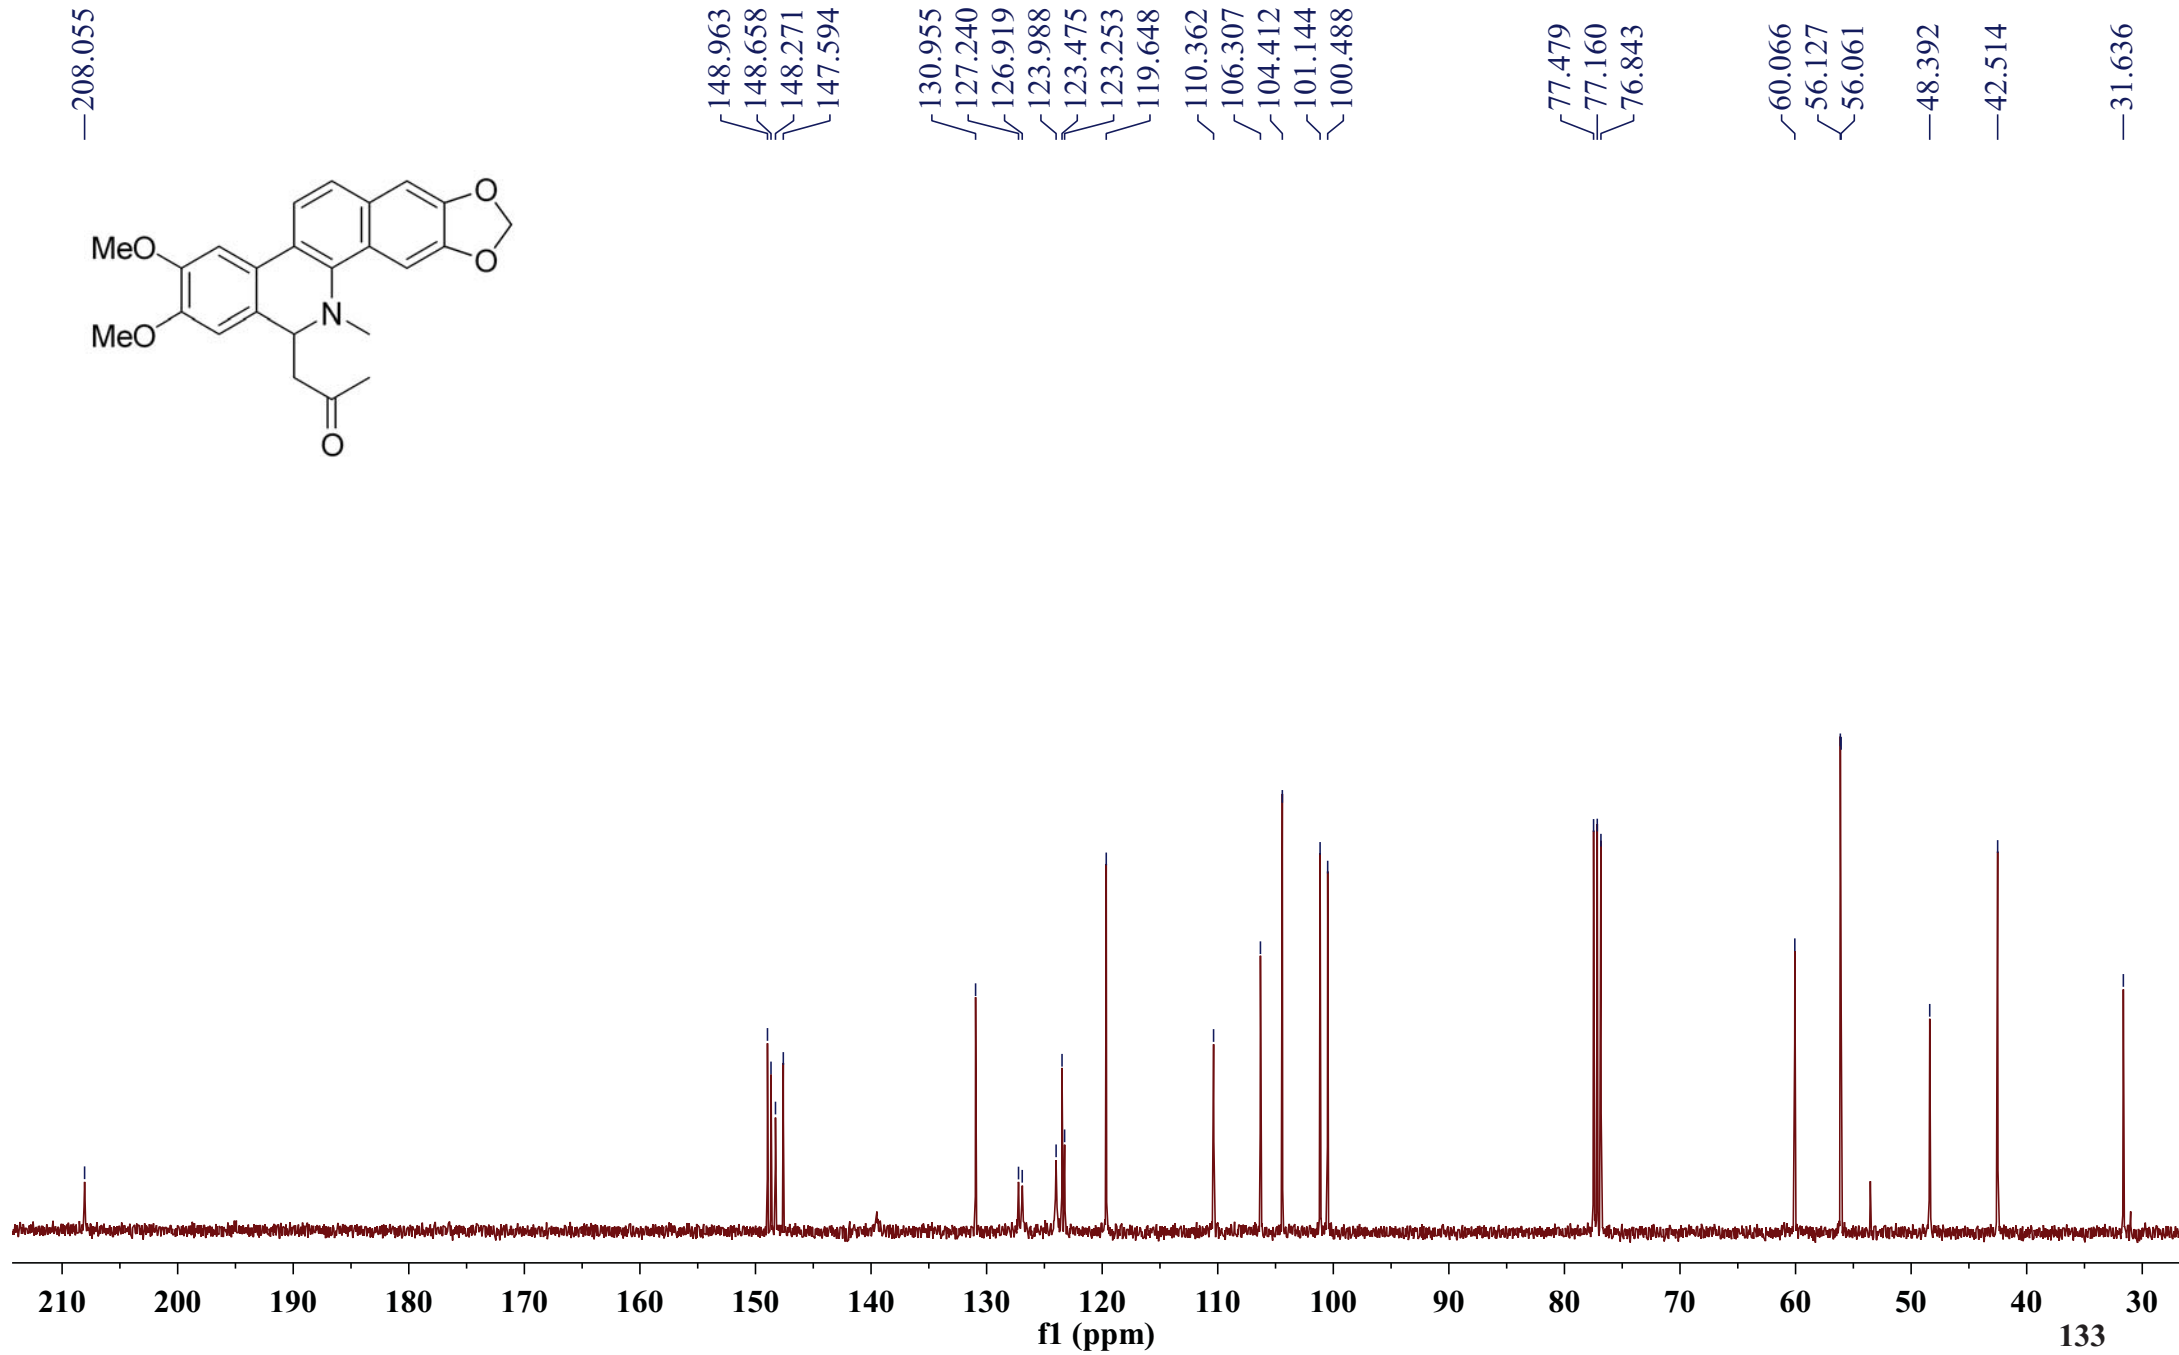

S6.59. <sup>1</sup>H NMR spectrum of compound 35

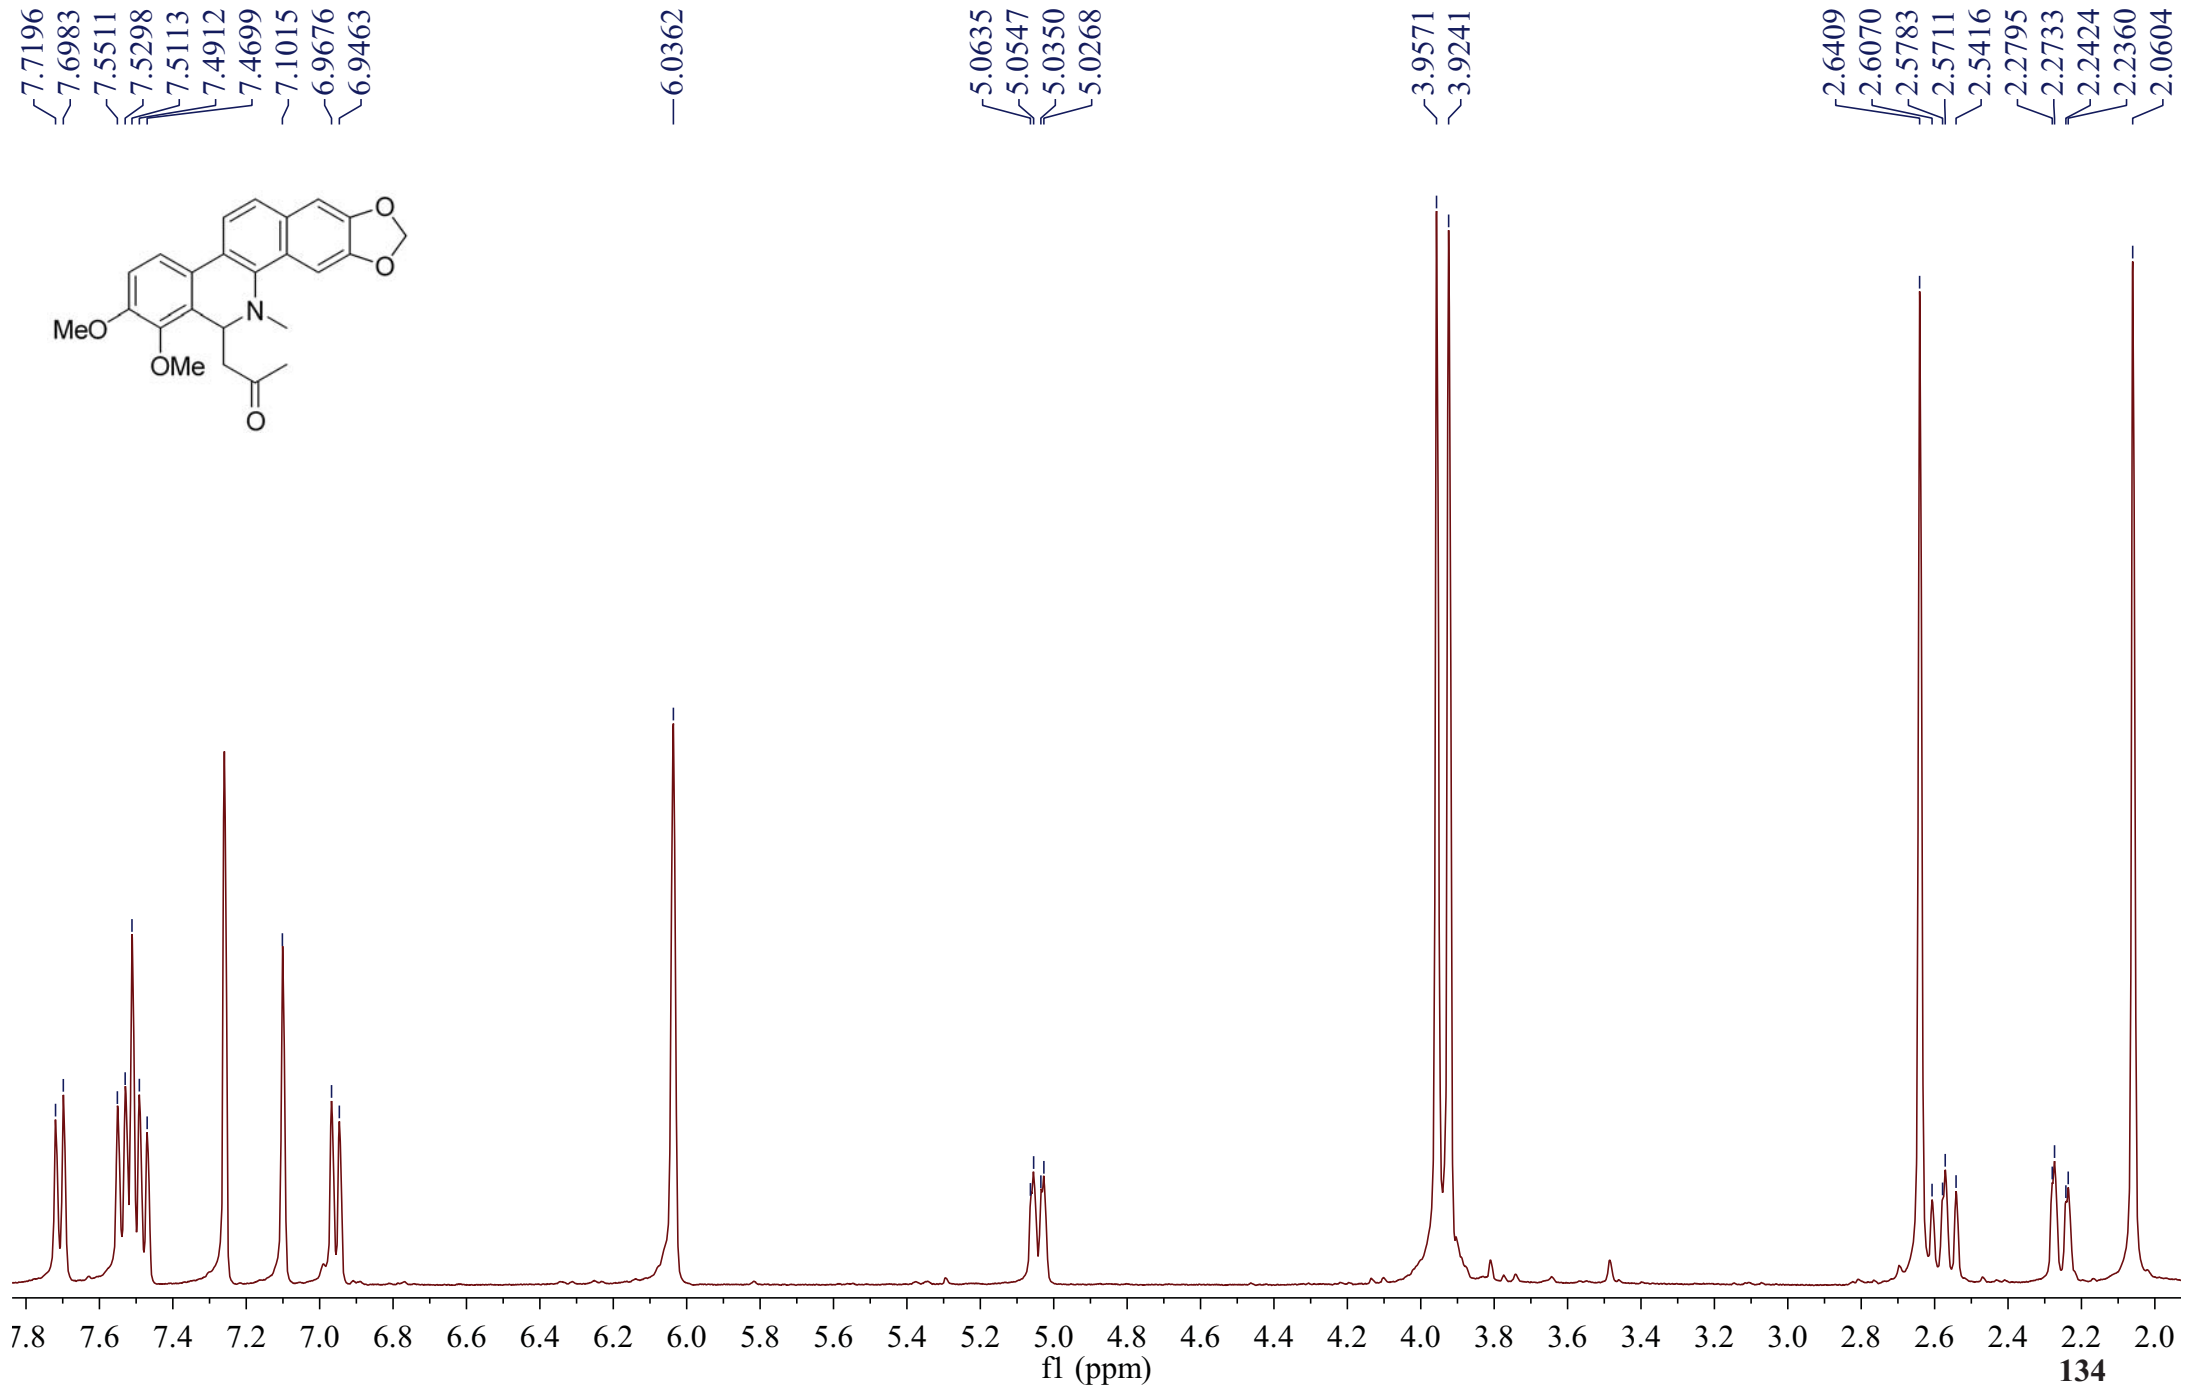

S6.60.  $^{13}\text{C}$  NMR and DEPT spectra of compound **35**

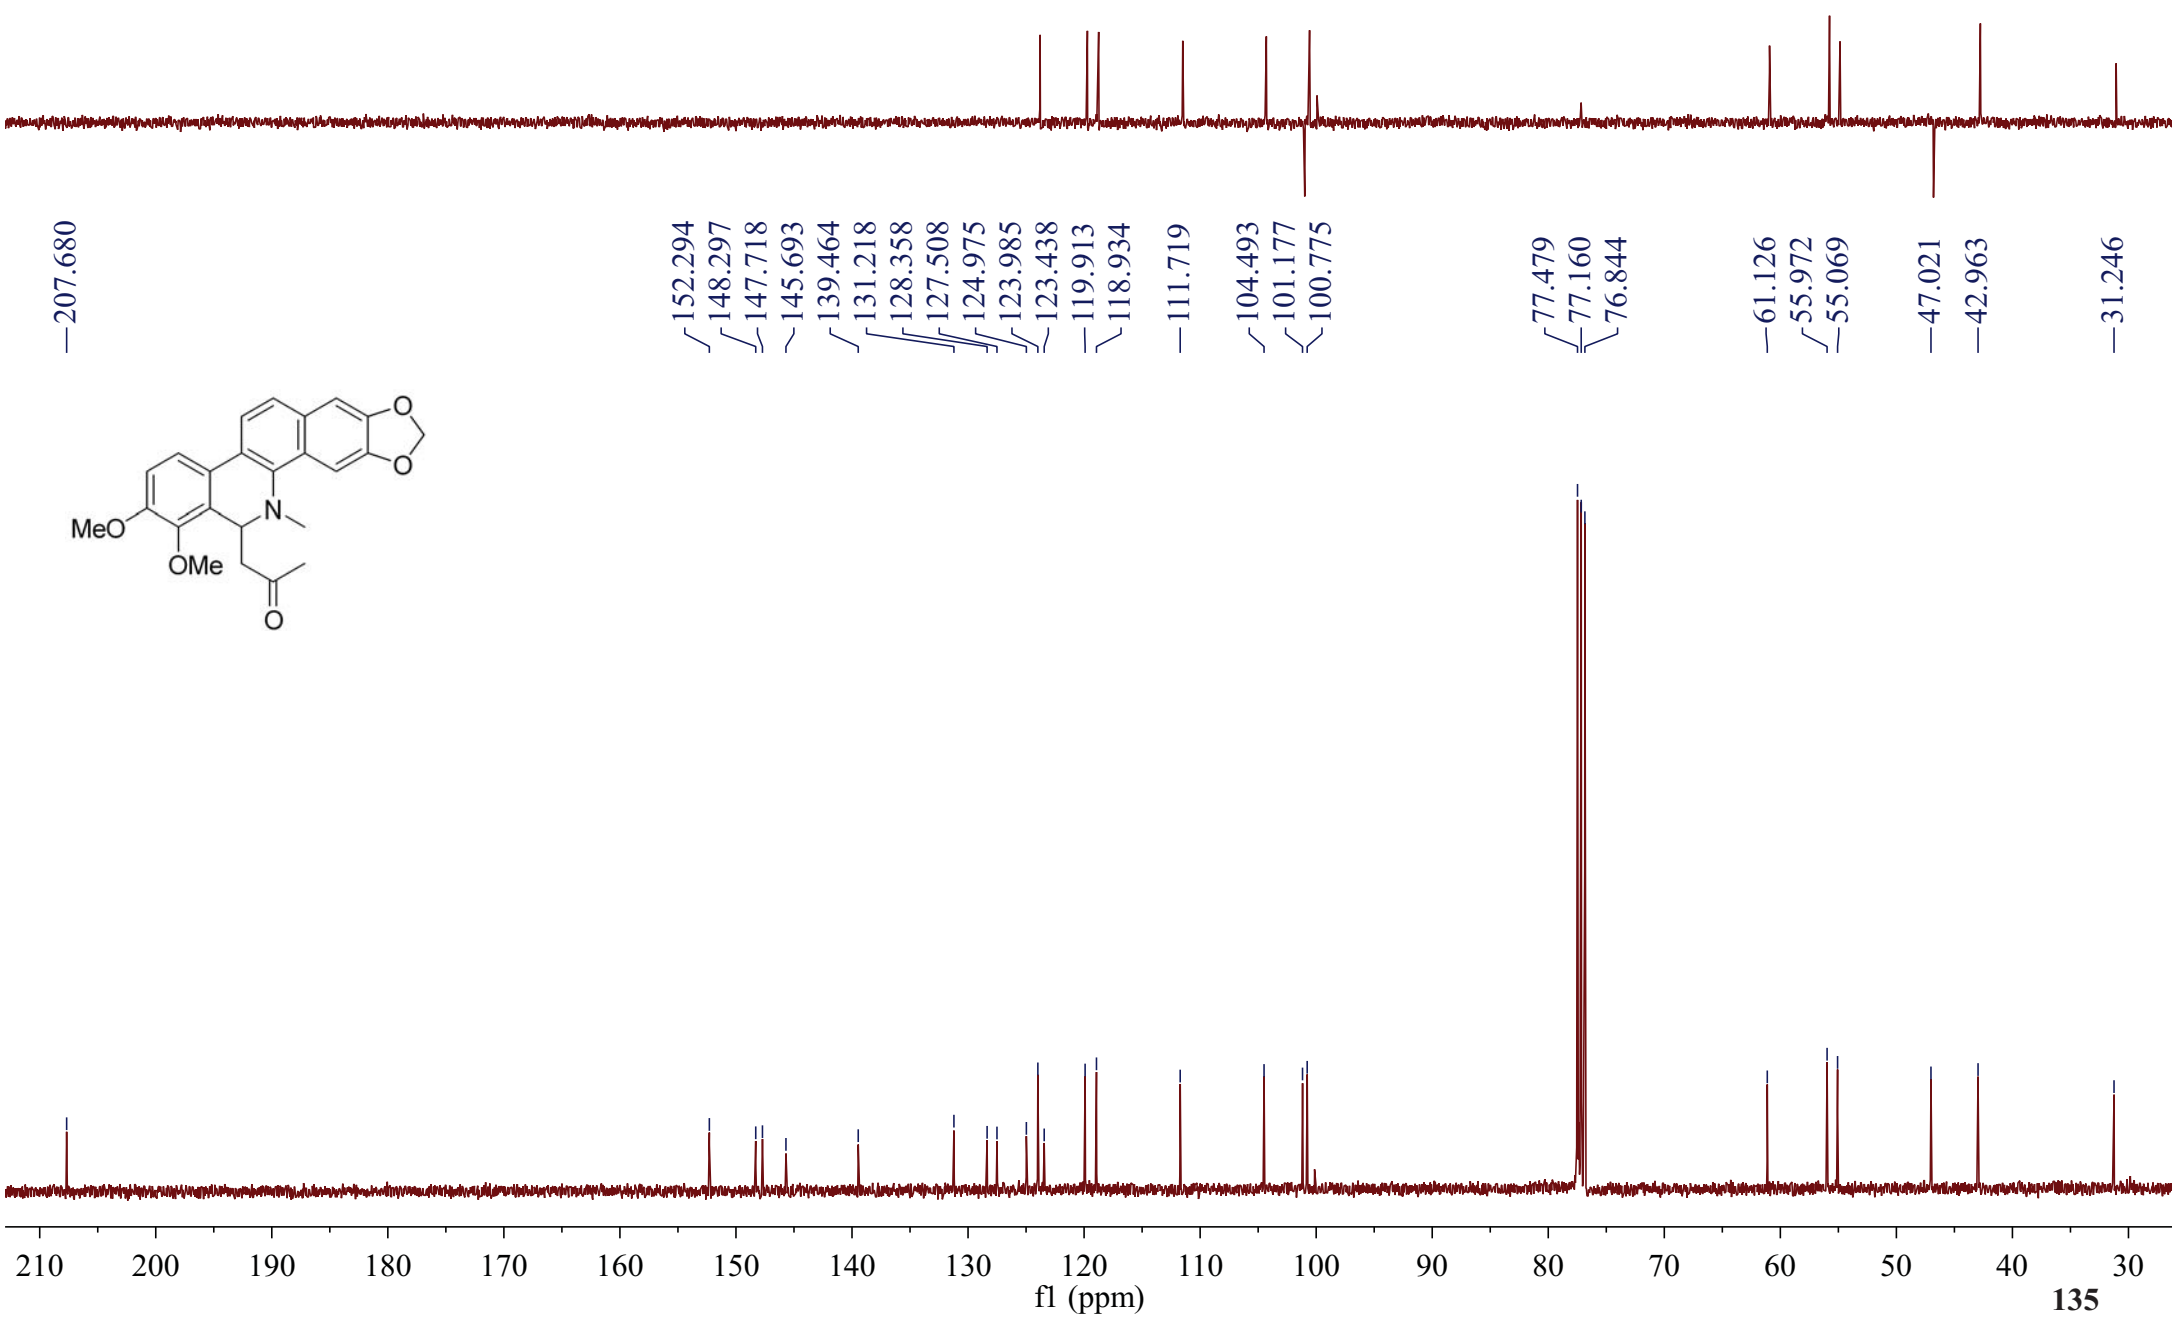

S6.61. <sup>1</sup>H NMR spectrum of compound **36**

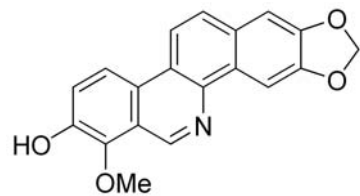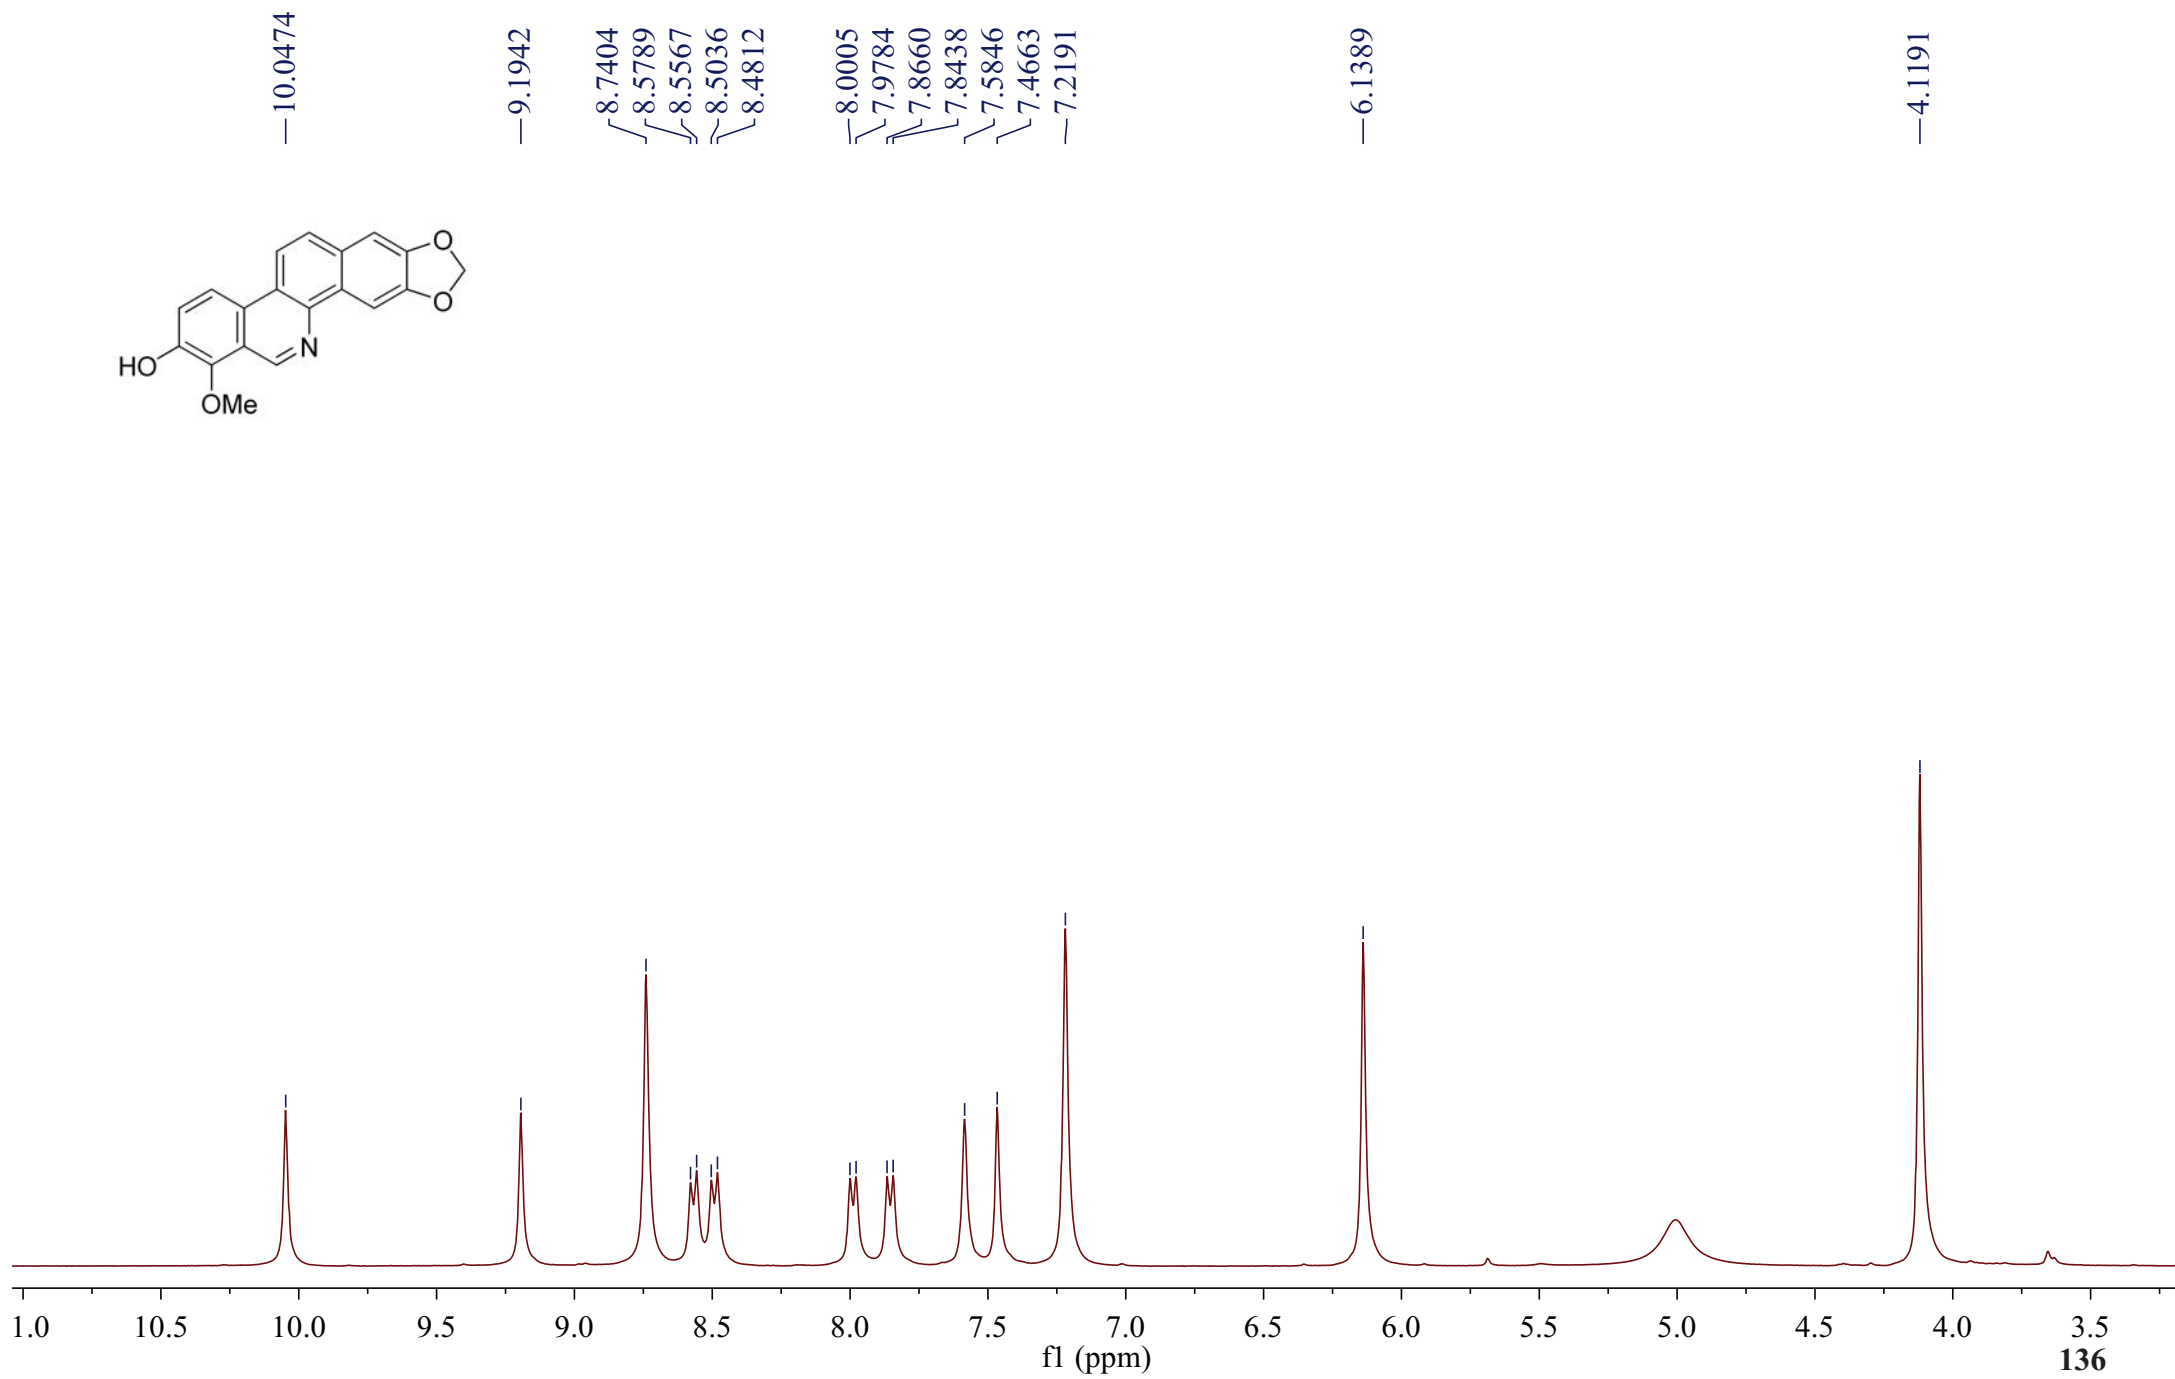



S6.62.  $^{13}\text{C}$  NMR and DEPT spectra of compound 36

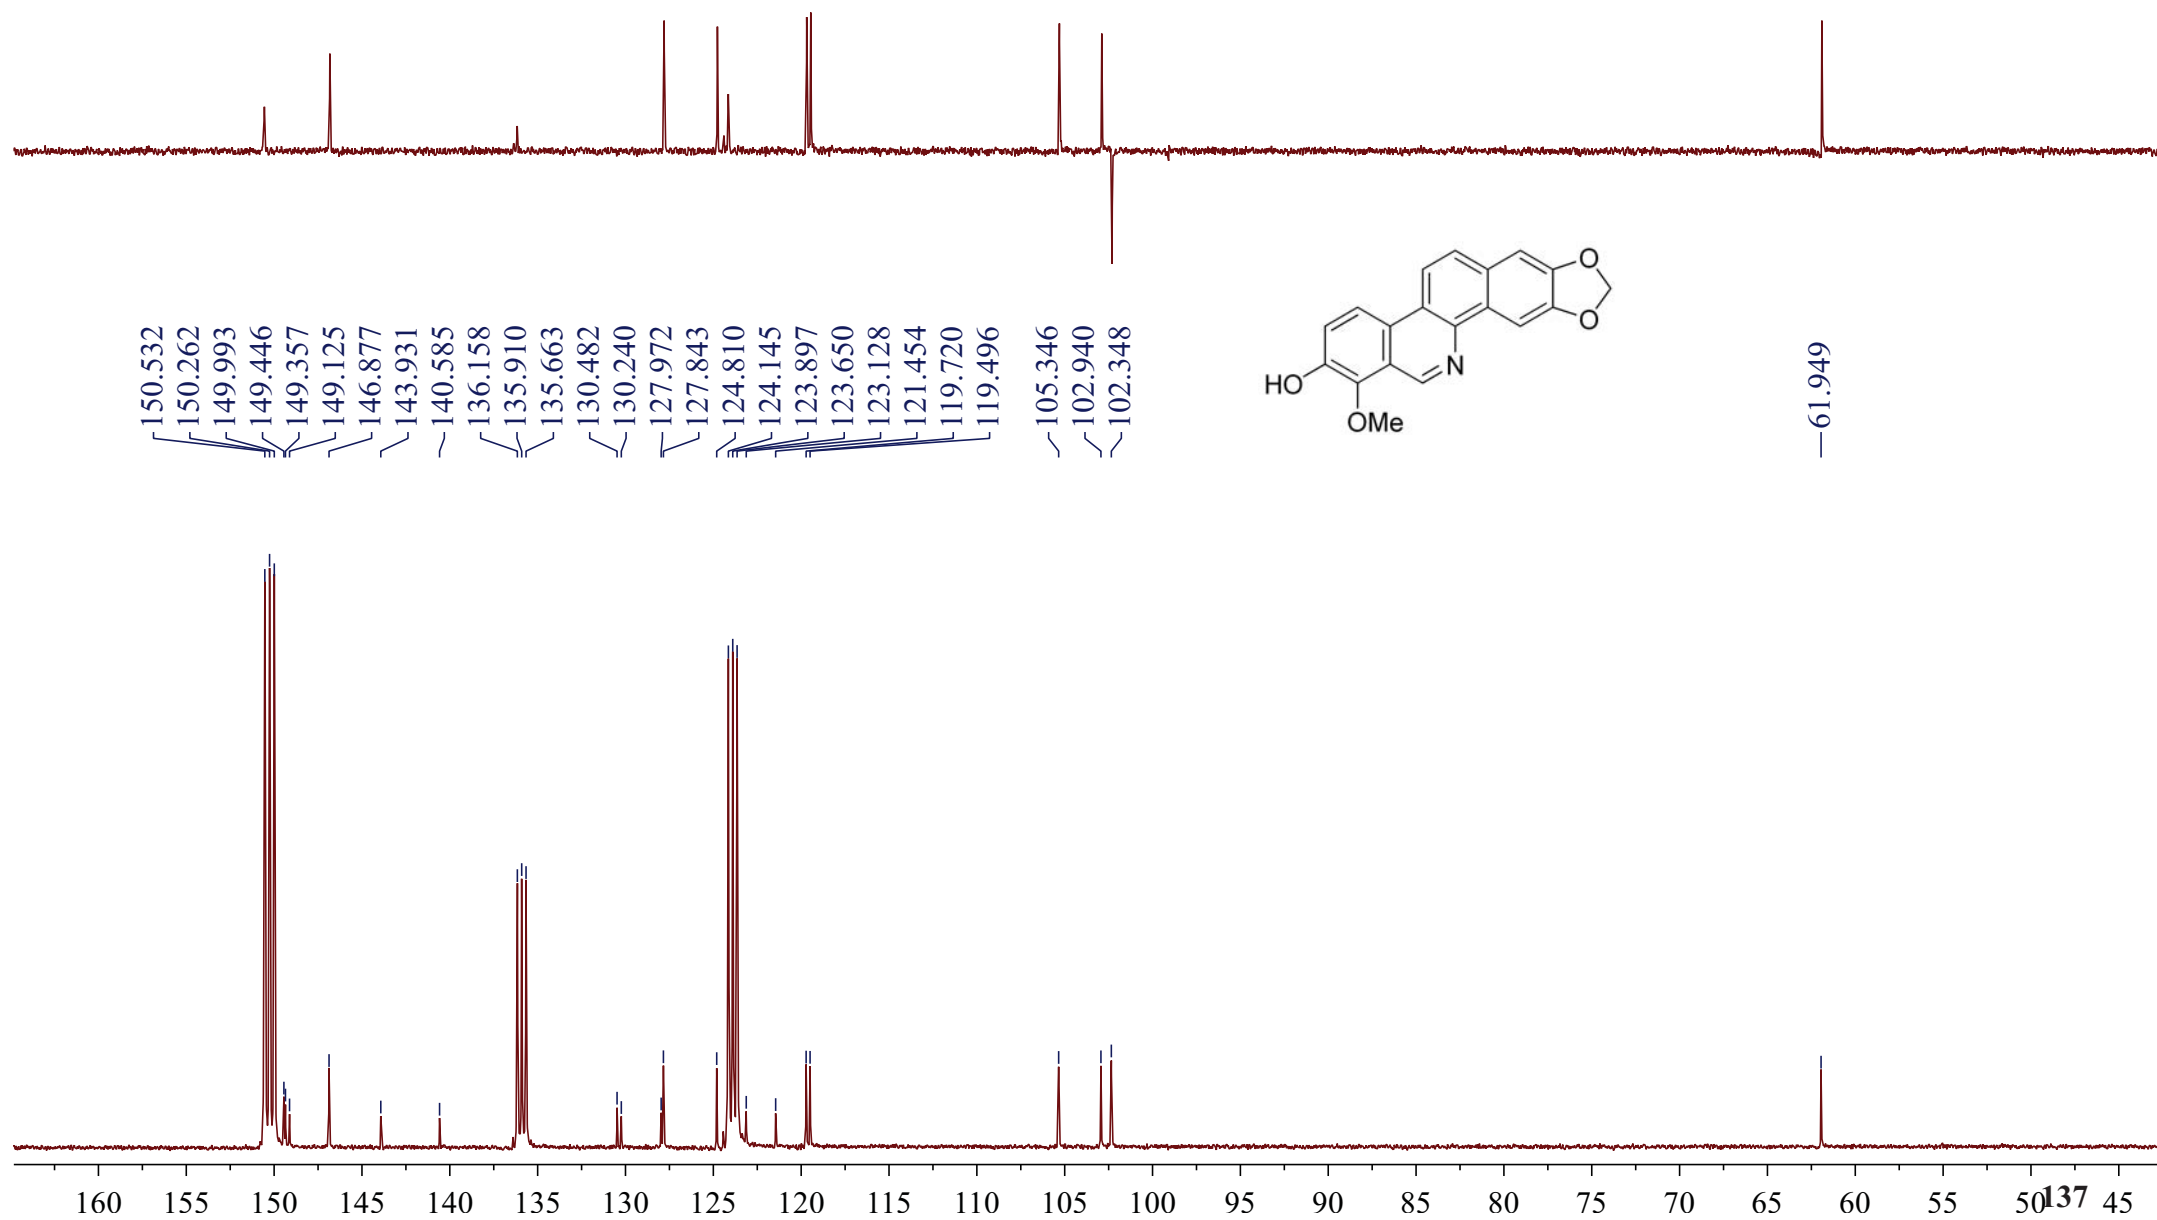

S6.63. <sup>1</sup>H NMR spectrum of compound 37

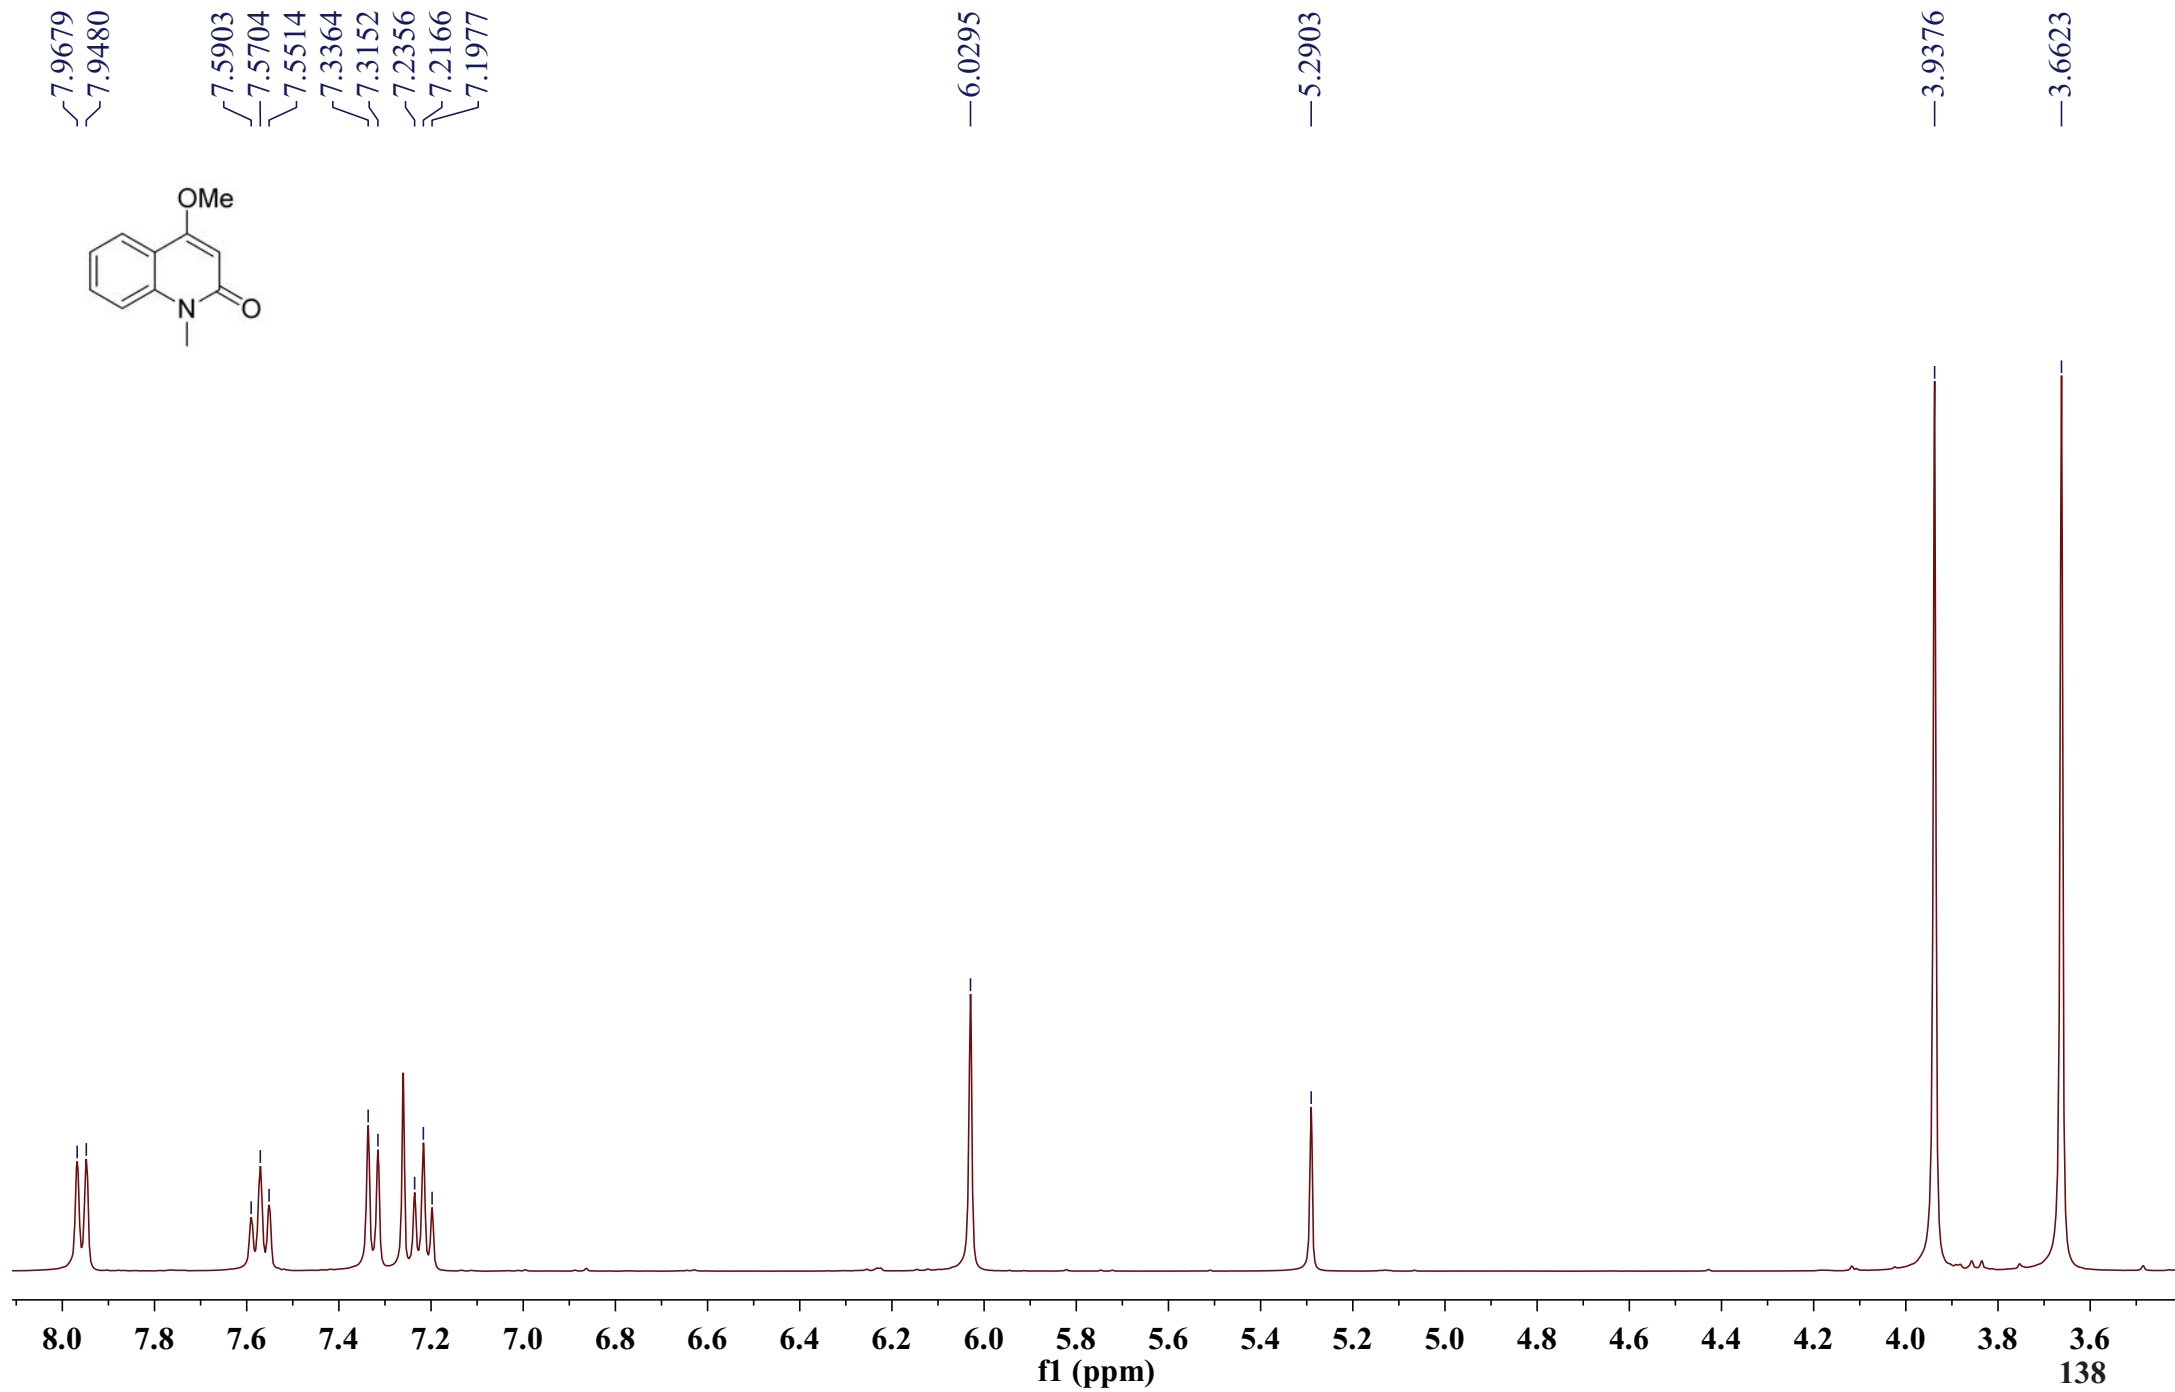

S6.64. <sup>13</sup>C NMR and DEPT spectra of compound 37

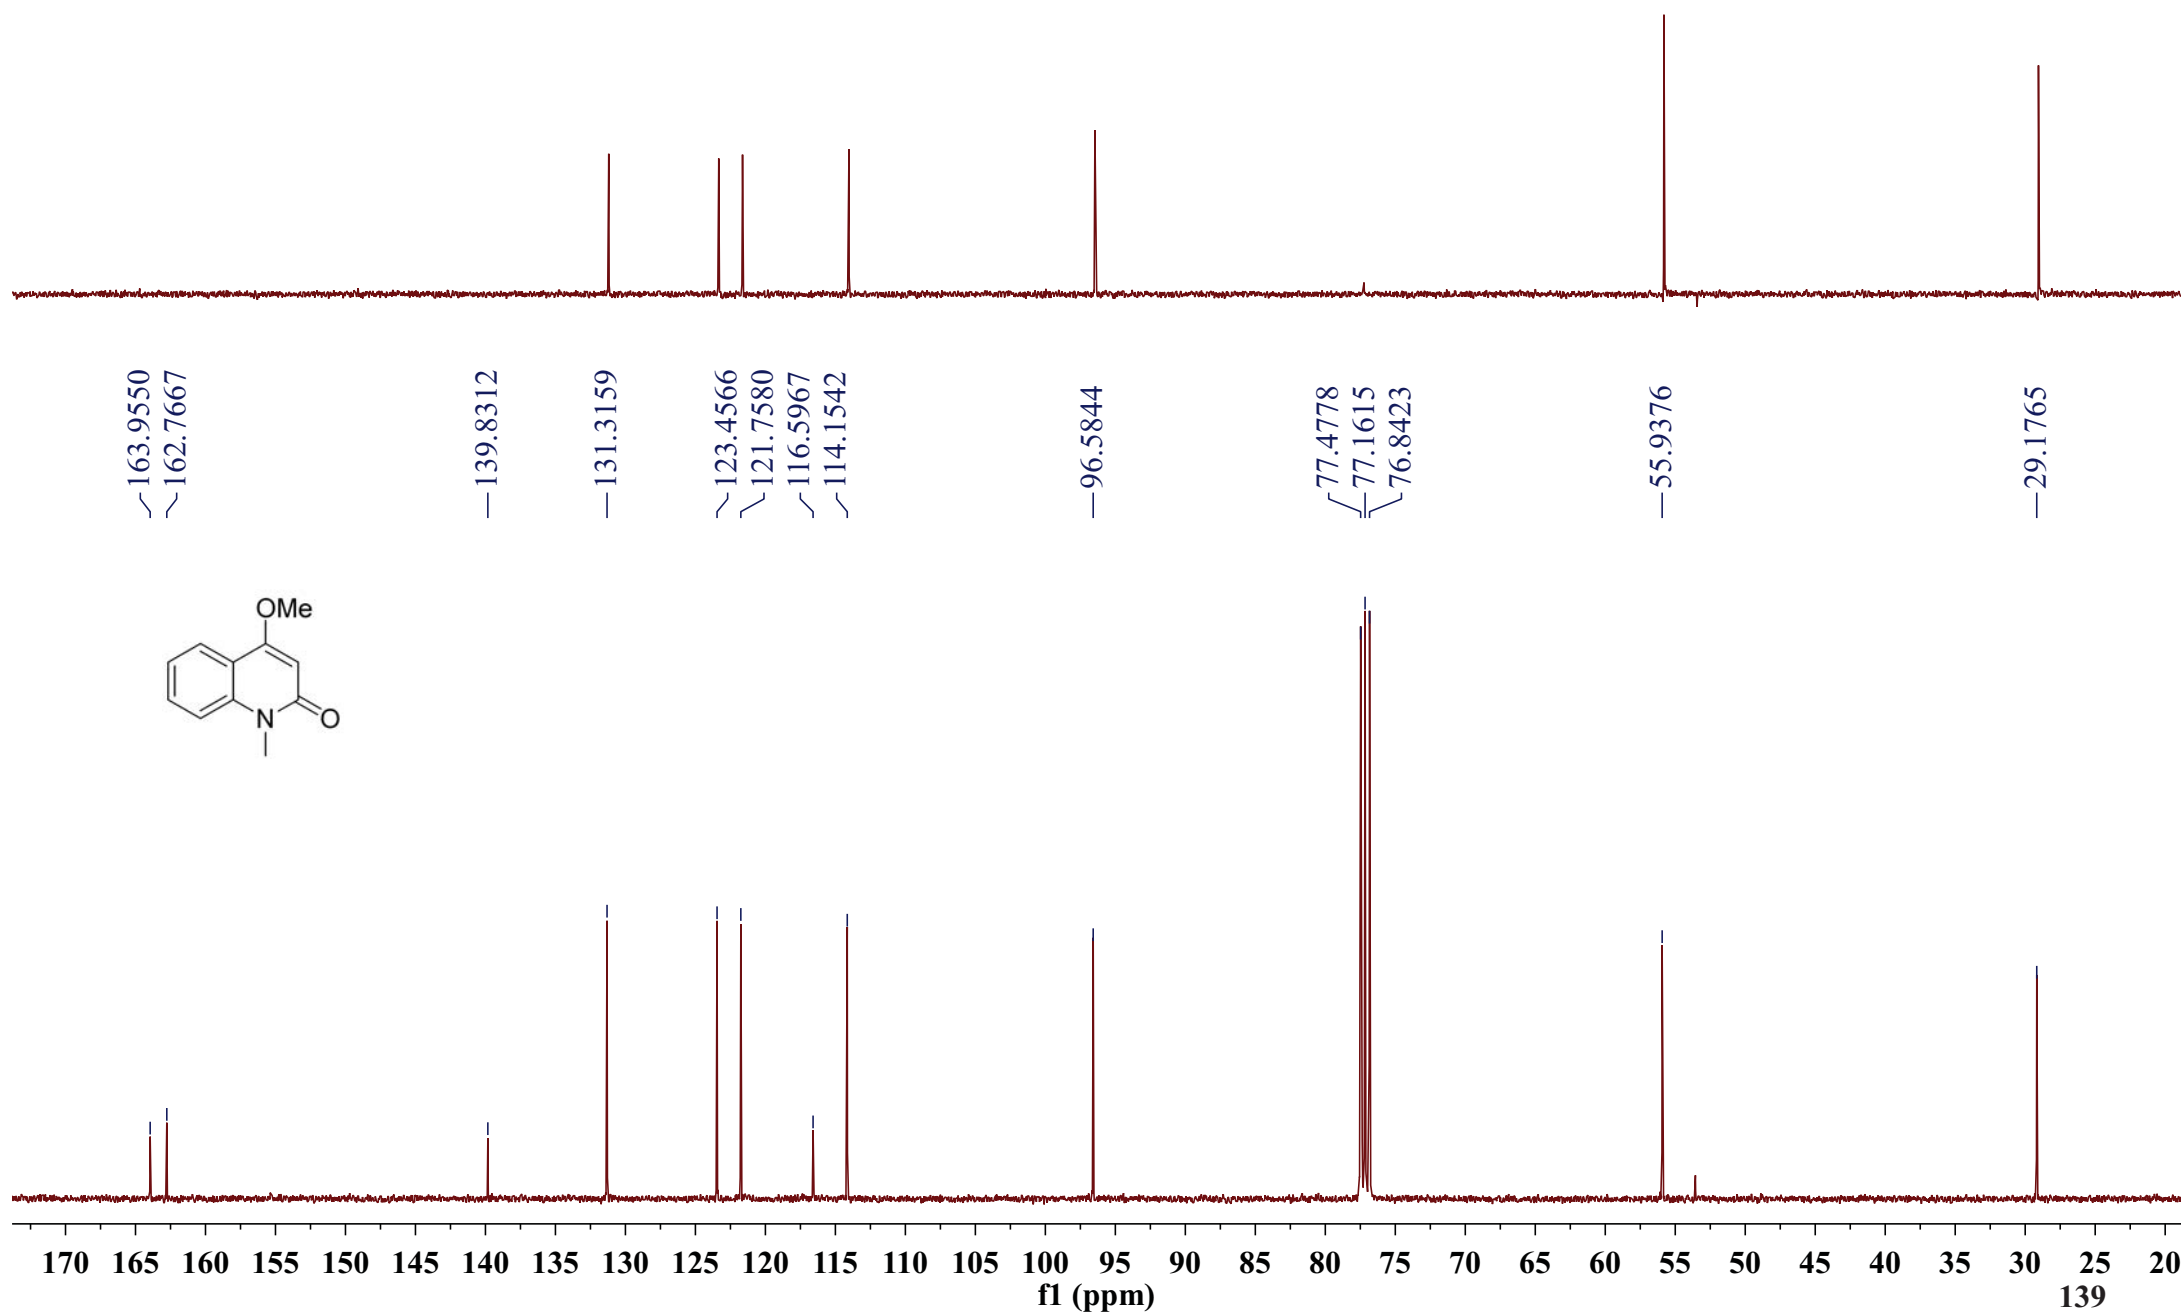

S6.65. <sup>1</sup>H NMR spectrum of compound 38

7.8376  
7.8347  
7.8160  
7.8131  
7.6264  
7.6195  
7.3580  
7.3390  
7.3365  
7.3174  
7.0530  
7.0468  
7.0330

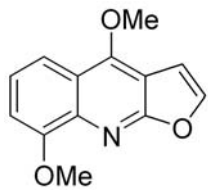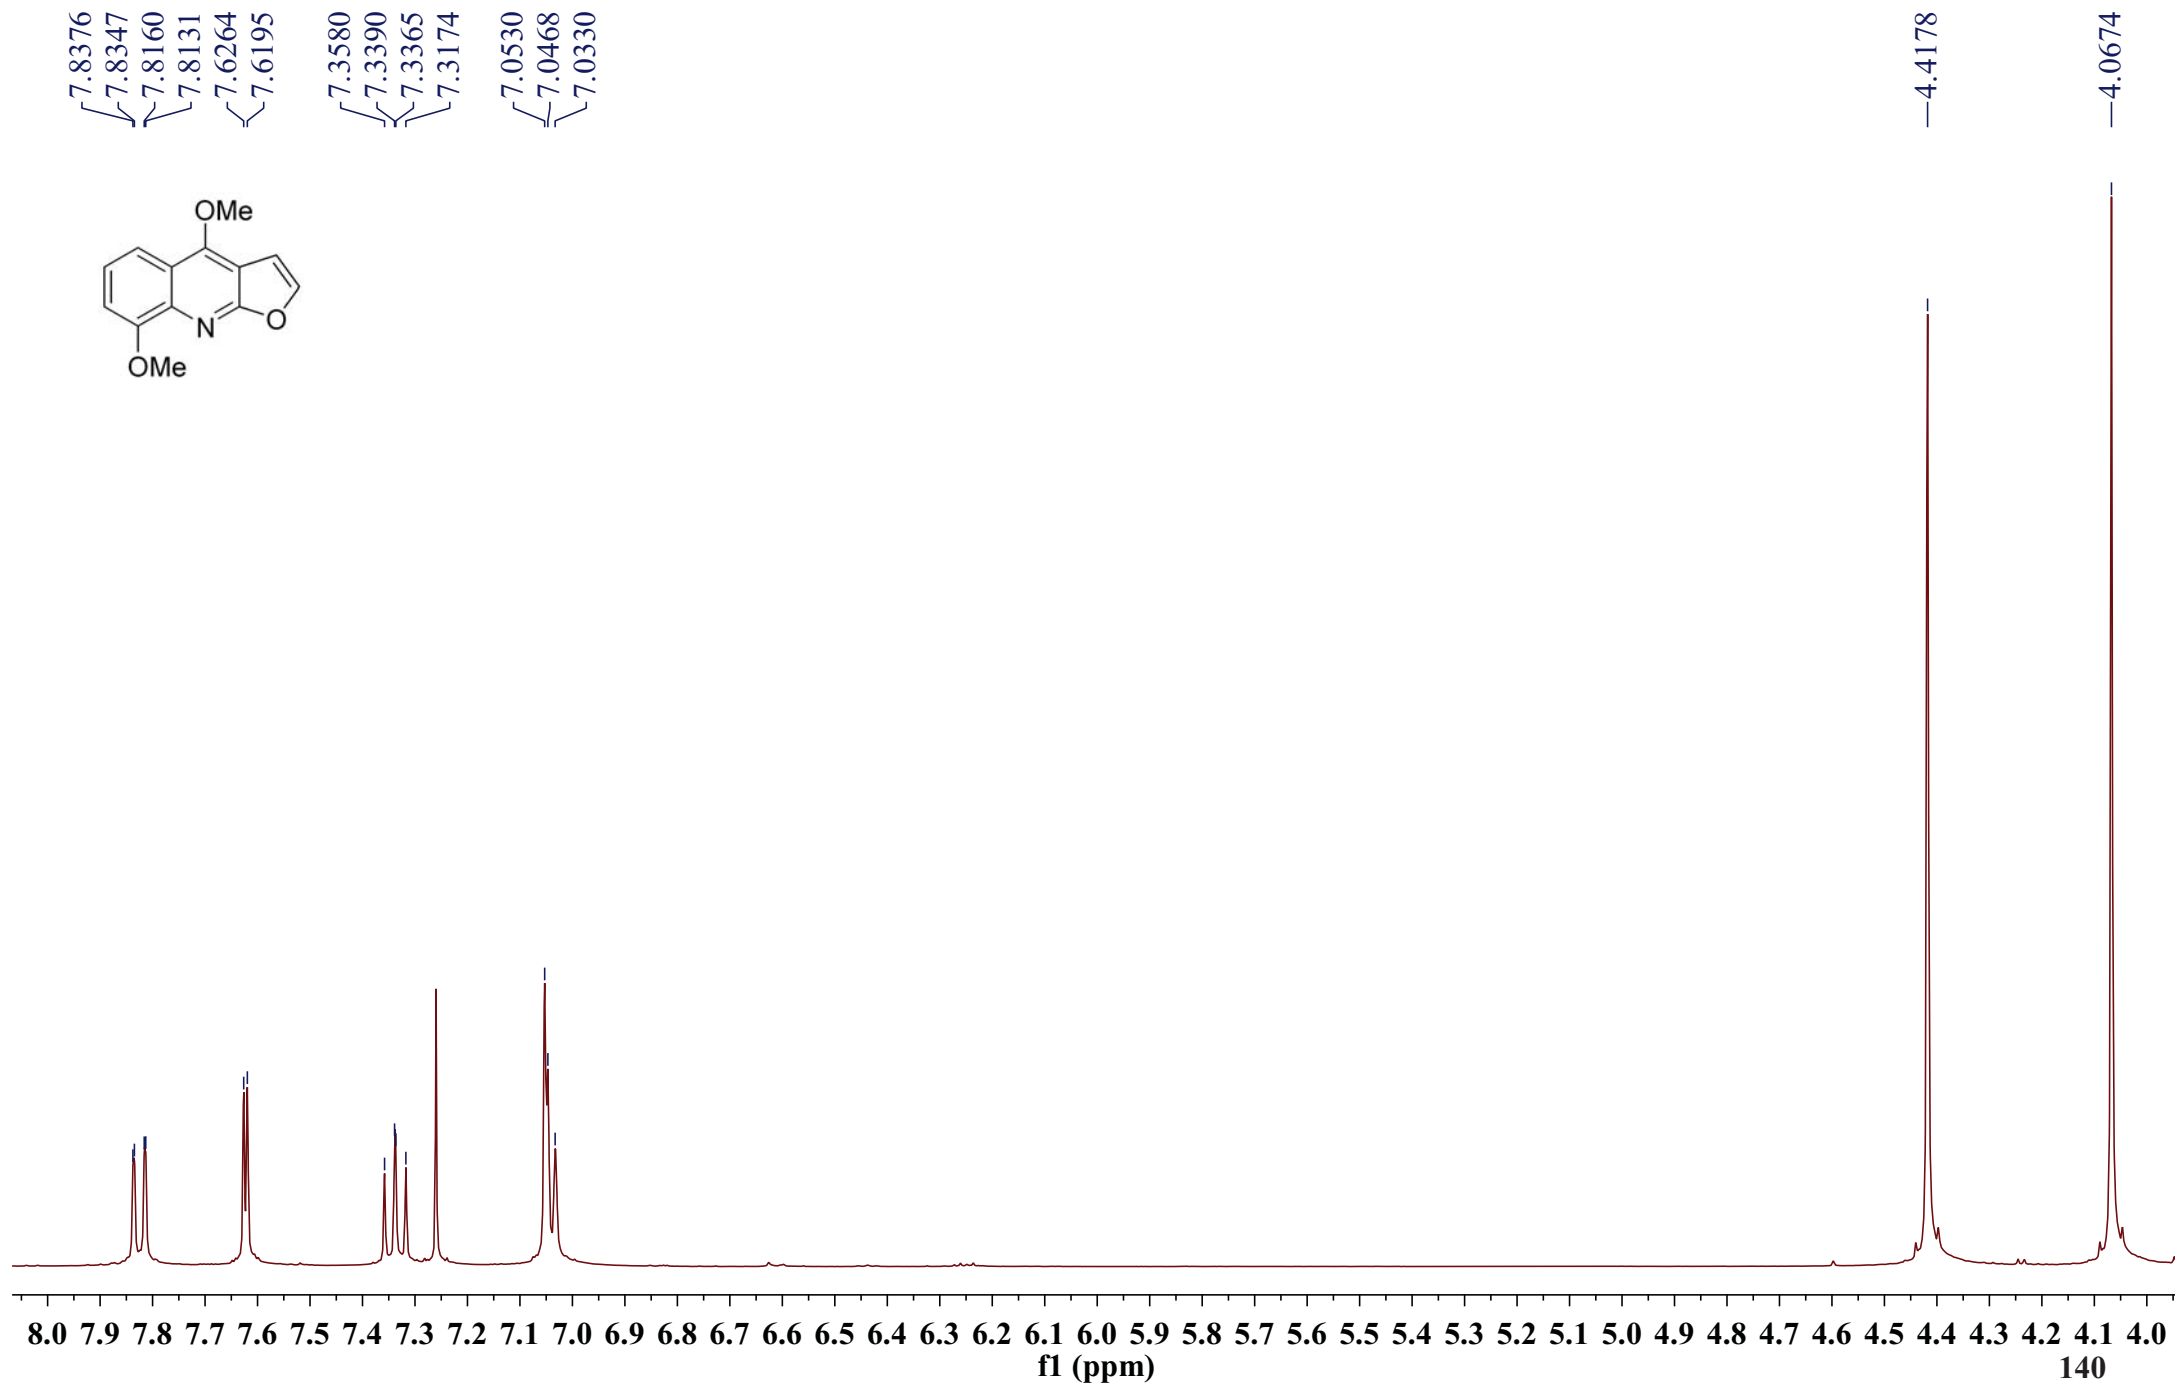

S6.66.  $^{13}\text{C}$  NMR and DEPT spectra of compound **38**

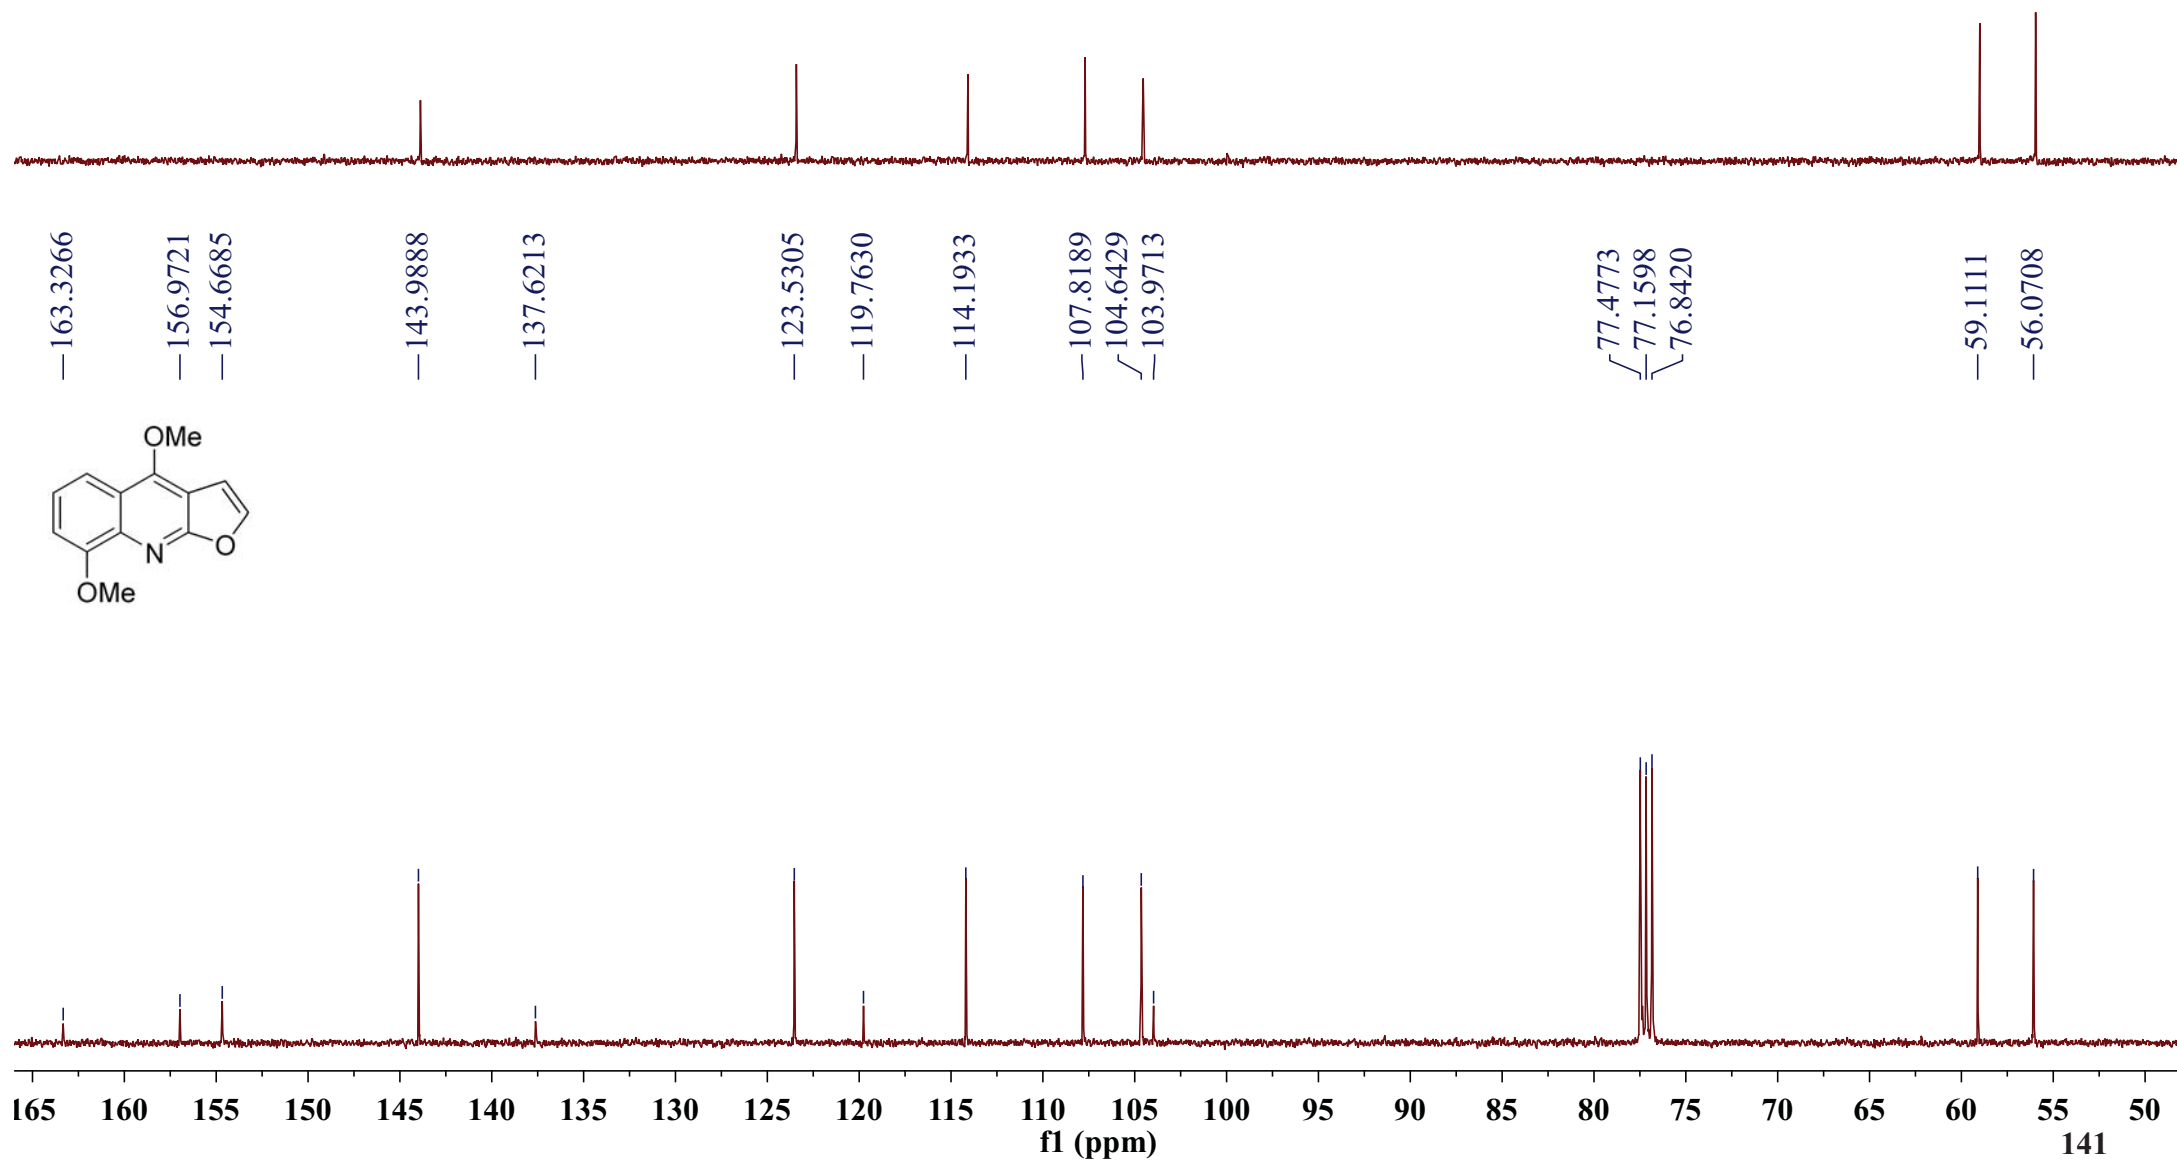

S6.67. <sup>1</sup>H NMR spectrum of compound 39

7.9746  
7.9516

7.5766  
7.5697

7.1817  
7.1586  
7.0535  
7.0466

4.4237

4.1996

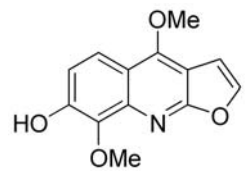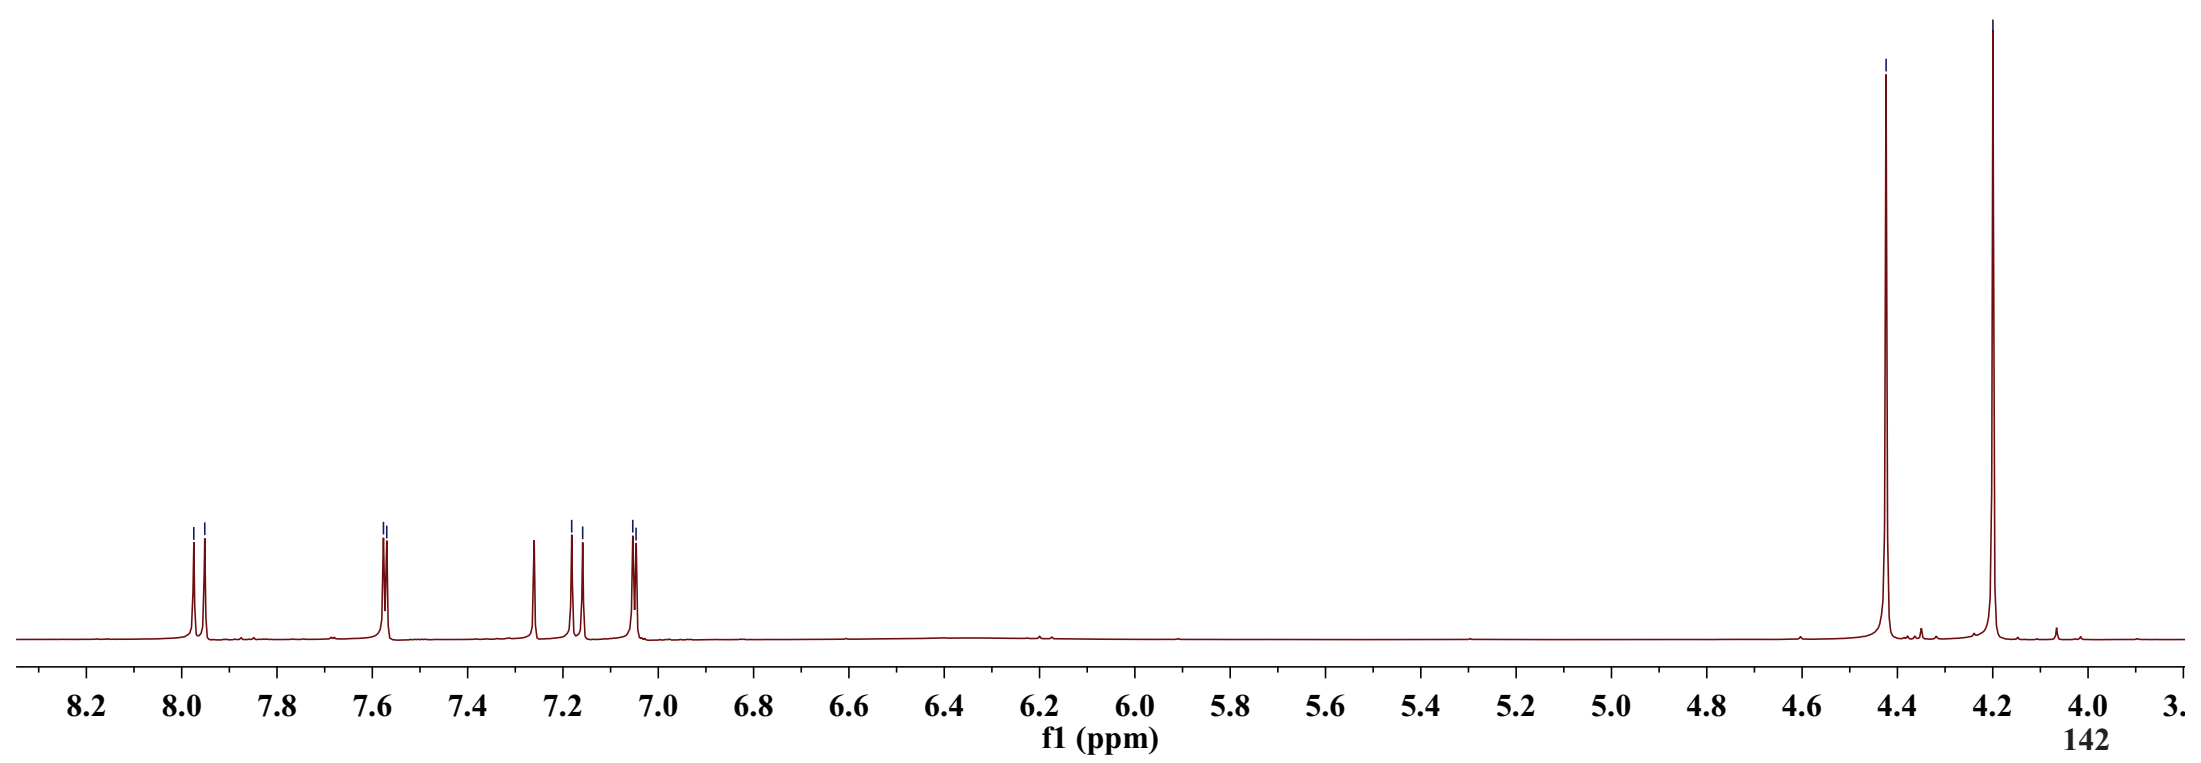

S6.68. <sup>13</sup>C NMR spectrum of compound 39

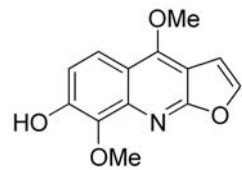

— 164.1809

— 157.5917

— 149.2129

— 142.8341

— 140.6776

— 138.7154

— 118.8705

— 114.7099

— 114.5139

— 104.9454

— 101.8066

— 77.4770

— 77.1598

— 76.8419

— 62.1217

— 59.1320

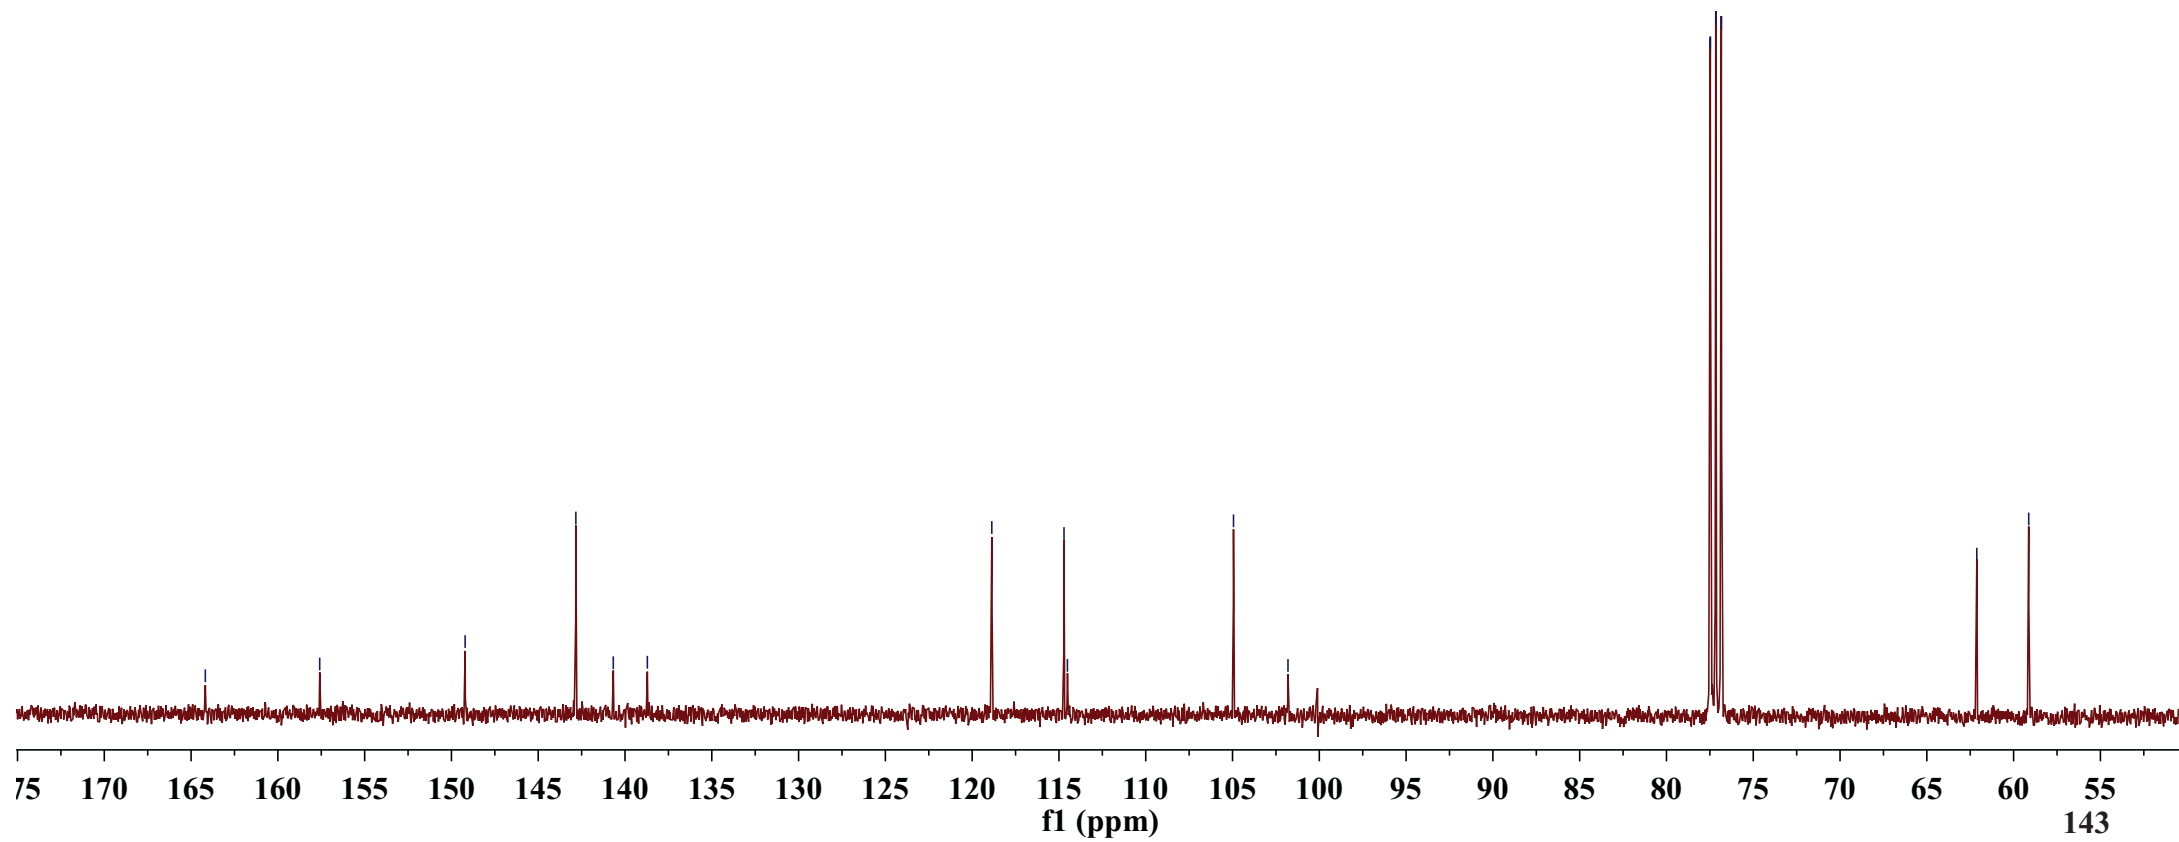

S6.69. <sup>1</sup>H NMR spectrum of compound 40

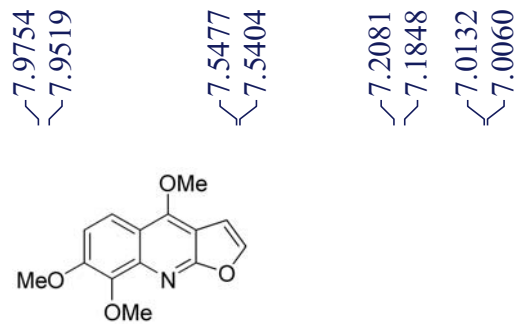

7.9754  
7.9519

7.5477  
7.5404

7.2081  
7.1848

7.0132  
7.0060

4.3955

4.0925  
4.0017

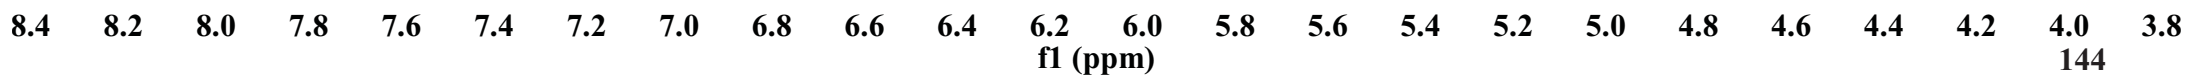



S6.70.  $^{13}\text{C}$  NMR spectrum of compound 40

—164.1888  
—157.5761  
—152.3645  
/ 143.1012  
/ 141.7742  
/ 141.0016  
/ 118.3220  
/ 114.7804  
/ 112.1044  
—104.8008  
—102.1067  
/ 77.4776  
/ 77.1599  
/ 76.8418  
~ 61.7572  
~ 59.1592  
~ 56.8421

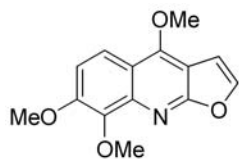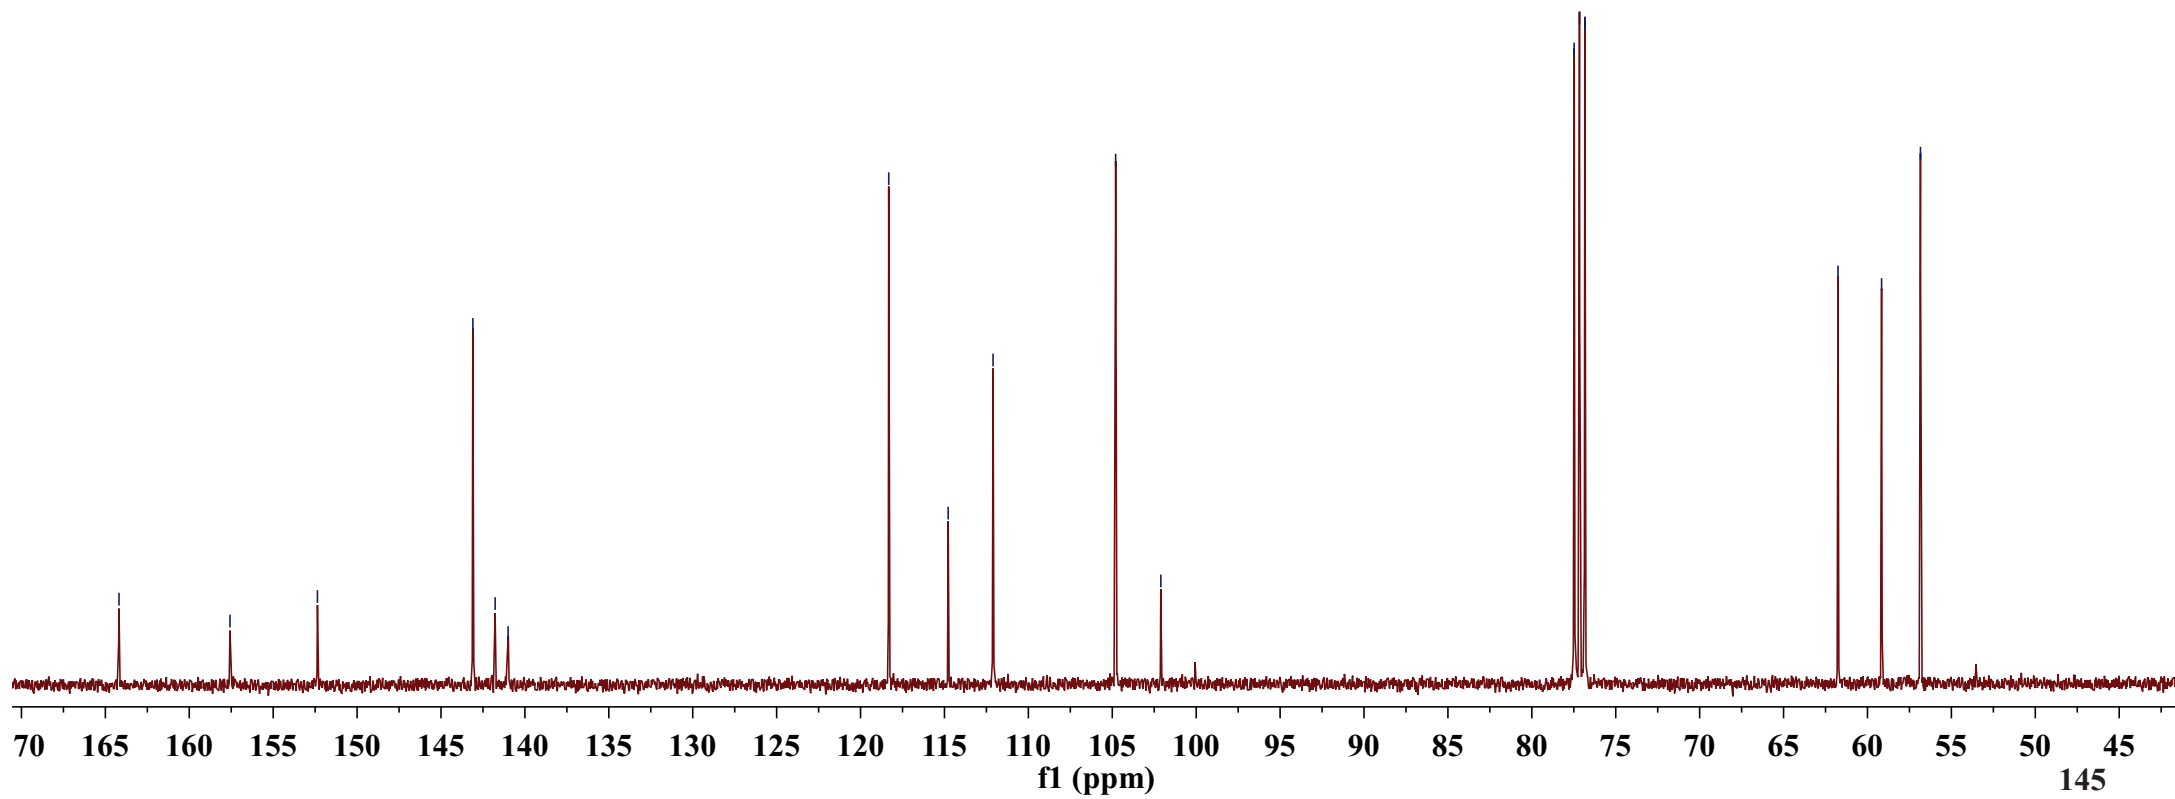

Supplement: c7ra04794k1.pdf [file c7ra04794k1.pdf]
